# Supplementary material
Source: MDPI journal article supplement (https://www.mdpi.com/2306-5729/2/3/28)
Supplement: s1 [file s1]

## Sheet: Sheet1
KEY								I - whole sample (in and on) , O - On sample	U - Undercover; F - Outside agricultural setting e.g. field, orchard, vineyard, X - Other setting, * - no data
PPDB Ref no	Pesticide	Chemical Name (CAS)	CAS RN	Plant	Scientific name	Study location	Matrix	IN or ON matrix	Field or Undercover	Min (days)	Max (days)	Mean (days)	Reference
3038	2-Allylphenol	2-prop-2-en-1-ylphenol	1745-81-9	Tomato	Solanum lycopersicum	China	Fruit	I	U	6.37	6.37	6.37	Meng Z.; Wei Y.; Xu D.; Hao S.; Hu J. Effect of 2-allylphenol against Botrytis cinerea Pers., and its residue in tomato fruit. Crop Protection, 2007, 26(11), 1711-1715.
3038	2-Allylphenol	2-prop-2-en-1-ylphenol	1745-81-9	Tomato	Solanum lycopersicum	China	Fruit	I	U	6.37	6.37	6.37	Hu J.; Zhang W.; Li J.Z. Residue analysis and dissipation of a new fungicide 2-allylphenol in tomato. Journal of Environmental sciences, 2005, 17(3), 491-493.
3025	2-Diethylaminoethyl hexanoate	2-(diethylamino)ethyl hexanoate	10369-83-2	Chinese cabbage	Brassica rapa subsp. pekinensis	*	Leaves	I	F	0.3	1.1	0.7	Liang L.; Bo R.; Jiang J.-Z.; Wang S.-l.; Ma L.-l.; Liu F.-M. Residue analysis and dissipation of diethyl aminoethyl hexanoate (DA-6) in Chinese cabbage and soil. Chinese Journal of Pesticide Science, 2011, 13(1), 99-102.
3025	2-Diethylaminoethyl hexanoate	2-(diethylamino)ethyl hexanoate	10369-83-2	Cotton	Gossypium hirsutum L.	China	Leaves	I	F	5.4	8.2	6.75	Jiang Y.; Jiang Y.; He S.; Zhang H.; Pan C. Dissipation of Diethyl Aminoethyl Hexanoate (DA-6) Residues in Pakchoi, Cotton Crops and Soil. Bulletin of Environmental Contamination and Toxicology, 2012, 88(4), 533-537.
3025	2-Diethylaminoethyl hexanoate	2-(diethylamino)ethyl hexanoate	10369-83-2	Pakchoi	Brassica rapa subsp. Chinensis	*	Leaves	I	F	0.56	0.56	0.56	Zhang H.; Xiea L.; Xu P.; Jiang S. Dissipation of the plant growth regulator hexanoic acid 2-(diethylamino) ethyl ester in pakchoi and soil. International Journal of Environmental Analytical Chemistry, 2008, 88(8), 561-569.
3025	2-Diethylaminoethyl hexanoate	2-(diethylamino)ethyl hexanoate	10369-83-2	Pakchoi	Brassica rapa subsp. Chinensis	China	Leaves	I	F	1.1	2.2	1.6	Jiang Y.; Jiang Y.; He S.; Zhang H.; Pan C. Dissipation of Diethyl Aminoethyl Hexanoate (DA-6) Residues in Pakchoi, Cotton Crops and Soil. Bulletin of Environmental Contamination and Toxicology, 2012, 88(4), 533-537.
2981	2-Tridecanone	2-Tridecanone	593-08-8	Broccoli	Brassica oleracea cv. Italian Green	KY, USA	Leaves	O	U	0.17	0.17	0.17	Antonious G.F. Persistence of 2-tridecanone on the leaves of seven vegetables. Bulletin of environmental contamination and toxicology, 2004, 1086-1093.
2981	2-Tridecanone	2-Tridecanone	593-08-8	Pepper	Capsicum annuum cv. Aristotle X3R	KY, USA	Leaves	O	U	0.15	0.15	0.15	Antonious G.F. Persistence of 2-tridecanone on the leaves of seven vegetables. Bulletin of environmental contamination and toxicology, 2004, 1086-1093.
2981	2-Tridecanone	2-Tridecanone	593-08-8	Radish	Raphanus sativis cv. Brio	KY, USA	Leaves	O	U	0.07	0.07	0.07	Antonious G.F. Persistence of 2-tridecanone on the leaves of seven vegetables. Bulletin of environmental contamination and toxicology, 2004, 1086-1093.
2981	2-Tridecanone	2-Tridecanone	593-08-8	Squash	Cucurbita maxima cv. Blue Hubbard	KY, USA	Leaves	O	U	0.06	0.06	0.06	Antonious G.F. Persistence of 2-tridecanone on the leaves of seven vegetables. Bulletin of environmental contamination and toxicology, 2004, 1086-1093.
2981	2-Tridecanone	2-Tridecanone	593-08-8	Swiss chard	Betavulgaris cv. Lucullus	KY, USA	Leaves	O	U	0.11	0.11	0.11	Antonious G.F. Persistence of 2-tridecanone on the leaves of seven vegetables. Bulletin of environmental contamination and toxicology, 2004, 1086-1093.
2981	2-Tridecanone	2-Tridecanone	593-08-8	Tomato	Lycopersicon esculentum cv. Ponderasa	KY, USA	Leaves	O	U	0.06	0.06	0.06	Antonious G.F. Persistence of 2-tridecanone on the leaves of seven vegetables. Bulletin of environmental contamination and toxicology, 2004, 1086-1093.
2981	2-Tridecanone	2-Tridecanone	593-08-8	Watermelon	Citrullus lanatus cv. Stars & Stripes	KY, USA	Leaves	O	U	0.07	0.07	0.07	Antonious G.F. Persistence of 2-tridecanone on the leaves of seven vegetables. Bulletin of environmental contamination and toxicology, 2004, 1086-1093.
4	2,4-D	(2,4-dichlorophenoxy)acetic acid	94-75-7	Bromegrass	Bromus spp.	NY, USA	Blades	O	F	3	3	3	Hagin R.D.; Linscott D.L.; Dawson J.E. 2, 4-D metabolism in resistant grasses. Journal of Agricultural and Food Chemistry, 1970, 18(5), 848-850.
4	2,4-D	(2,4-dichlorophenoxy)acetic acid	94-75-7	Kentucky bluegrass	Poa pratensis L.	Canada	Thatch	I	F	1	39.6	24.8	Thompson D G.; Stephenson G R.; Sears M.K. Persistence, distribution and dislodgeable residues of 2, 4‐d following its application to turfgrass. Pest Management Science, 1984, 15(4), 353-360
4	2,4-D	(2,4-dichlorophenoxy)acetic acid	94-75-7	Kentucky bluegrass	Poa pratensis L.	Iowa, USA	Thatch	I	F	2.7	3.6	3.15	Starrett S.K.; Christians N.E.; Austin T.Al. Movement of herbicides under two irrigation regimes applied to turfgrass. Advances in Environmental Research, 2000, 4(2), 169-176.
4	2,4-D	(2,4-dichlorophenoxy)acetic acid	94-75-7	Orchard grass	*	NY, USA	Blades	O	F	2.4	2.4	2.4	Hagin R.D.; Linscott D.L.; Dawson J.E. 2, 4-D metabolism in resistant grasses. Journal of Agricultural and Food Chemistry, 1970, 18(5), 848-850.
4	2,4-D	(2,4-dichlorophenoxy)acetic acid	94-75-7	Timothy grass	Phleum pratense	NY, USA	Blades	O	F	1.1	1.1	1.1	Hagin R.D.; Linscott D.L.; Dawson J.E. 2, 4-D metabolism in resistant grasses. Journal of Agricultural and Food Chemistry, 1970, 18(5), 848-850.
4	2,4-D	(2,4-dichlorophenoxy)acetic acid	94-75-7	Turfgrass	Mix of Poa pratensis, Lolium perenne & Festuca spp.	USA	Blades	I	X (compost)	13.1	13.1	13.1	Vandervoort C.; Zabik M.J.; Branham B.; Lickfeldt D.W. Fate of Selected Pesticides Applied to Turfgrass: Effect of Composting on Residues. Bulletin of Environmental Contamination and Toxicology, 1997, 58(1), 38-45.
4	2,4-D	(2,4-dichlorophenoxy)acetic acid	94-75-7	Turfgrass	*		Blades	I	F	18.1	24.9	21.5	Bowhey C.; McLeod H.; Stephenson G.R. Dislodgable residues of 2, 4-D on turf. In Proceedings of the British Crop Protection Conference-Weeds. 1987, 3(8a-10), 799-808
4	2,4-D	(2,4-dichlorophenoxy)acetic acid	94-75-7	Wheat	Triticum aestivum L.	*	Straw	I	F	1	1.17	1.09	Liu C.; Li L.; Wang S.; You X.; Jiang S.; Liu F. Dissipation and residue of 2,4-D isooctyl ester in wheat and soil. Environmental Monitoring and Assessment, 2012, 184(7), 4247-4251.
3026	2,4-D dimethylammonium salt	2-(2,4-dichlorophenoxy)acetic acid compound with N-methylmethanamine	2008-39-1	Wheat	Triticum aestivum L.	China	Straw	I	F	1.61	1.82	1.72	Jiang H.; Yan S.; Donglan W.; Xing S.; Mingtao F.; Xianjin L. Dissipation and residues of 2,4-D-dimethylammonium in wheat and soil. Bulletin of Environmental Contamination and Toxicology, 2010, 85(2), 157-159.
963	2,4,5-T	2,4,5-trichlorophenoxyacetic acid	93-76-5	Turfgrass	*	USA	Blades	O	F	8	14.7	11.35	Willis G.H.; McDowell L.L. Pesticide persistence on foliage. Reviews of Environmental Contamination and Toxicology, 1987, 100, 23-73.
716	3-hydroxycarbofuran	2,3-dihydro-2,2-dimethyl-3-hydroxy-7-benzofuranyl N-methylcarbamate	16655-82-6	Grapefruit	Citrus × paradisi	CA, USA	Leaves	O	F	7	11	9	Iwata Y.; Knaak J.B.; Dusch M.E.; O'Neal J.R.; Pappas J.L. Worker reentry research for carbosulfan applied to California citrus trees. Journal of Agricultural and Food Chemistry, 1983, 31(6), 1131-1136.
716	3-hydroxycarbofuran	2,3-dihydro-2,2-dimethyl-3-hydroxy-7-benzofuranyl N-methylcarbamate	16655-82-6	Lemon	Citrus x limon	CA, USA	Leaves	O	F	12	16	14	Iwata Y.; Knaak J.B.; Dusch M.E.; O'Neal J.R.; Pappas J.L., Worker reentry research for carbosulfan applied to California citrus trees. Journal of Agricultural and Food Chemistry, 1983, 31(6), 1131-1136.
716	3-hydroxycarbofuran	2,3-dihydro-2,2-dimethyl-3-hydroxy-7-benzofuranyl N-methylcarbamate	16655-82-6	Orange	Citrus x sinensis	CA, USA	Leaves	O	F	12	43	27.5	Iwata Y.; Knaak J.B.; Dusch M.E.; O'Neal J.R.; Pappas J.L., Worker reentry research for carbosulfan applied to California citrus trees. Journal of Agricultural and Food Chemistry, 1983, 31(6), 1131-1136.
8	Abamectin	avermectin B1	71751-41-2	Cabbage	Brassica oleracea capitata	China	Head	I	F	1.4	1.6	1.5	Yuan L.; Li, J.-Z.; Mo H.-H.; Guo B.-Y.; Wang H.-l. Residue and decline dynamics of abamectin in Brassica campestris and Brassica oleracea under supervised field trials. Chinese Journal of Pesticide Science, 2010, 12(2), 185-189.
8	Abamectin	avermectin B1	71751-41-2	Cabbage	Brassica oleracea capitata	China	Head	I	F	1.5	5.4	3.45	Ma Z.-Z.; Zhang, J.-F.; Yin, H.-Y.; Wu X.-J.; Liu J.-H. Research on the Residue Dynamics of Avermectin in Cabbage and Soil with the Method of SPE-Pre-column Derivatization-HPLC. Journal of Anhui Agricultural Sciences, 2011, 39(5), 2680-2682.
8	Abamectin	avermectin B1	71751-41-2	Cauliflower	Brassica oleracea botrytis	China	Head	I	F	1.47	2.16	1.82	Xie X.-C.; Zhang S.-H.; Wang D.-S.; Huangpu W.-G.; Yang T.; Jian Z. Degradation dynamics of abamectin in cauliflowers and soils. Pesticides, 2006, 45(11), 768-770.
8	Abamectin	avermectin B1	71751-41-2	Celery	Apium graveolens	Florida, USA	Stalks	I	F	4.6	11.2	7.9	Moye H.A.; Malagodi M.H.; Yoh J.; Deyrup C.L.; Chang S.M.; Leibee G.L.; Ku C.C.; Wislocki P.G. Avermectin B1a metabolism in celery: A residue study. Journal of Agricultural and Food Chemistry, 1990, 38(1), 290-297.
8	Abamectin	avermectin B1	71751-41-2	Celery	Apium graveolens	Florida, USA	Leaves	I	F	5.6	12.9	9.25	Moye H.A.; Malagodi M.H.; Yoh J.; Deyrup C.L.; Chang S.M.; Leibee G.L.; Ku C.C.; Wislocki P.G. Avermectin B1a metabolism in celery: A residue study. Journal of Agricultural and Food Chemistry, 1990, 38(1), 290-297.
8	Abamectin	avermectin B1	71751-41-2	Chinese cabbage	Brassica rapa subsp. pekinensis	China	Leaves	I	F	1.34	1.56	1.45	Li B.-T.; Pei C.-M. Determination and Dynamics of Avermectin Residue in Brassica chinensis and Soil. Modern Agrochemicals, 1999, 8(4), 27-30.
8	Abamectin	avermectin B1	71751-41-2	Chinese cabbage	Brassica rapa subsp. pekinensis	China	Leaves	I	F	1.3	1.7	1.5	Yuan L., Li J.-z., Mo, H.-h., Guo B.-y., Wang H.-l.. Residue and decline dynamics of abamectin in Brassica campestris and Brassica oleracea under supervised field trials. Chinese Journal of Pesticide Science, 2010, 12(2), 185-189.
8	Abamectin	avermectin B1	71751-41-2	Chrysanthemum	Chrysanthemum morifolium	*	Leaves	O	U	1.1	2.4	1.75	Brouwer D.H.; de Haan M.; Leenheers L.H.; de Vreede S.A.F.; van Hemmen J.J.; Half-Lives of Pesticides on Greenhouse Crops. Bulletin of Environmental Contamination and Toxicology, 1997, 58(6), 976-984.
8	Abamectin	avermectin B1	71751-41-2	Cotton	Gossypium hirsutum L.	TX, USA	Leaves	O	F	1.5	1.5	1.5	Bull D.L. Fate of methomyl on cotton. Environmental Entomology, 1974, 3(4), 723-724.
8	Abamectin	avermectin B1	71751-41-2	Gerbera	Gerbera hybrida	USA	Leaves	O	U	1.5	1.5	1.5	Schneider F.; Fredrickson S. Abamectim Dislodgeable Foliar Residues Following Reduced-volume and Conventional Pesticide Applications in a Greenhouse. State of California, Environmental Protection Agency, Department of Pesticide Regulation, Registration and Health Evaluation Division, Worker Health and Safety Branch. 1999.
8	Abamectin	avermectin B1	71751-41-2	Gojiberry	Lycium barbarum	China	Fruit	I	F	1.34	1.5	1.42	Zhang Y.; Zhang Z.-S.; Wang F.; Zhang R. Residues of Abamectin in Wolfberry. Agrochemicals, 2007, 46(1), 46-47.
8	Abamectin	avermectin B1	71751-41-2	Grapefruit	Citrus × paradisi	CA, USA	Fruit	O	F	20	20	20	Maynard M.S.; Iwata Y.; Wislocki P.G.; Ku C.C.; Jacob T.A. Fate of avermectin B1a on citrus fruits. 1. Distribution and magnitude of the avermectin B1a and carbon-14 residue on citrus fruits from a field study. Journal of Agricultural and Food Chemistry, 1989, 37 (1), 178–183.
8	Abamectin	avermectin B1	71751-41-2	Grapefruit	Citrus × paradisi	CA, USA	Fruit	I	F	23	23	23	Maynard M.S.; Iwata Y.; Wislocki P.G.; Ku C.C.; Jacob T.A. Fate of avermectin B1a on citrus fruits. 1. Distribution and magnitude of the avermectin B1a and carbon-14 residue on citrus fruits from a field study. Journal of Agricultural and Food Chemistry, 1989, 37 (1), 178–183.
8	Abamectin	avermectin B1	71751-41-2	Lemon	Citrus x limon	China	Fruit	I	F	3.82	9.17	6.5	Liao H.-Y.; Yang R.-B.; Xu H.-R.; Tang Z.; Jian T.; Gao X. Residue Dynamic of Avermectin, Clofentezine 20.8% SC in Citrus and Soil. Agrochemicals, 2010, 49(4):,268-272.
8	Abamectin	avermectin B1	71751-41-2	Lemon	Citrus x limon	CA, USA	Fruit	O	F	15	15	15	Maynard M.S.; Iwata Y.; Wislocki P.G.; Ku C.C.; Jacob T.A. Fate of avermectin B1a on citrus fruits. 1. Distribution and magnitude of the avermectin B1a and carbon-14 residue on citrus fruits from a field study. Journal of Agricultural and Food Chemistry, 1989, 37 (1), 178–183.
8	Abamectin	avermectin B1	71751-41-2	Lemon	Citrus x limon	CA, USA	Fruit	O	F	20	20	20	Maynard M.S.; Iwata Y.; Wislocki P.G.; Ku C.C.; Jacob T.A. Fate of avermectin B1a on citrus fruits. 1. Distribution and magnitude of the avermectin B1a and carbon-14 residue on citrus fruits from a field study. Journal of Agricultural and Food Chemistry, 1989, 37 (1), 178–183.
8	Abamectin	avermectin B1	71751-41-2	Orange	Citrus x sinensis	CA, USA	Fruit	O	F	7	38	22.5	Maynard M.S.; Iwata Y.; Wislocki P.G.; Ku C.C.; Jacob T.A. Fate of avermectin B1a on citrus fruits. 1. Distribution and magnitude of the avermectin B1a and carbon-14 residue on citrus fruits from a field study. Journal of Agricultural and Food Chemistry, 1989, 37 (1), 178–183.
8	Abamectin	avermectin B1	71751-41-2	Orange	Citrus x sinensis	CA, USA	Fruit	O	F	31	31	31	Maynard M.S.; Iwata Y.; Wislocki P.G.; Ku C.C.; Jacob T.A. Fate of avermectin B1a on citrus fruits. 1. Distribution and magnitude of the avermectin B1a and carbon-14 residue on citrus fruits from a field study. Journal of Agricultural and Food Chemistry, 1989, 37 (1), 178–183.
8	Abamectin	avermectin B1	71751-41-2	Perilla	Perilla frutescens	Egypt	Leaves	I	F	0.7	0.7	0.7	Rahman M.M.; Na T.W.; El-Aty A.A.; Park J.H.; Al Mahmud M.N.U.; Yang A.; ... Shim J.H. Dissipation pattern and pre-harvest residue limit of abamectin in perilla leaves. Environmental Monitoring and Assessment, 2013, 185(11), 9461-9469.
8	Abamectin	avermectin B1	71751-41-2	Strawberry	Fragaria x ananassa	CA, USA	Fruit	O	F	0.98	0.98	0.98	Lanning, C.L., Wehner, T.A., Norton, J.A., Dunbar, D.M., Grosso, L.S. Correlation of Actual Strawberry Harvester Exposure with that Predicted from Abamectin Dislodgeable Foliar Residues. Journal of Agricultural and Food Chemistry, 1998, 46(6): 2340-2345. Calculated.
8	Abamectin	avermectin B1	71751-41-2	Squash	Cucurbita pepo ver refera	Egypt	Leaves	I	F	0.65	0.65	0.65	Shalaby A.A.A. Residual behavior of abamectin and cyflufenamid in squash plants. Annals of Agricultural Science, Moshtohor, 2016, 54(4), 955-960
8	Abamectin	avermectin B1	71751-41-2	Squash	Cucurbita pepo ver refera	Egypt	Peel	I	F	0.18	0.18	0.18	Shalaby A.A.A. Residual behavior of abamectin and cyflufenamid in squash plants. Annals of Agricultural Science, Moshtohor, 2016, 54(4), 955-960
8	Abamectin	avermectin B1	71751-41-2	Squash	Cucurbita pepo ver refera	Egypt	Fruit	I	F	0.37	0.37	0.37	Shalaby A.A.A. Residual behavior of abamectin and cyflufenamid in squash plants. Annals of Agricultural Science, Moshtohor, 2016, 54(4), 955-960
8	Abamectin	avermectin B1	71751-41-2	Tomato	Solanum lycopersicum Mill.	Egypt	Fruit	I	F	1.06	1.06	1.06	Abd Al-Rahman S.H.; Almaz M.M.; Ahmed N.S. Dissipation of Fungicides, Insecticides, and Acaricide in Tomato Using HPLC-DAD and QuEChERS Methodology. Food Analytical Methods, 2012, 5(3), 564-570.
8	Abamectin	avermectin B1	71751-41-2	Tomato	Solanum lycopersicum Mill.	Egypt	Fruit	I	X (flood irrigated)	4.1	4.1	4.1	Ramadan G.; Shawir M.; El-Bakary A.; Abdelgaleil S. Dissipation of four insecticides in tomato fruit using high performance liquid chromatography and QuEChERS methodology. Chilean Journal of Agricultural Research, 2016, 76(1), 129-133.
9	Acephate	O,S-dimethyl acetylphosphoramidothioate	30560-19-1	Cabbage	Brassica oleracea capitata	China	Leaves	O	F	3.1	13.5	8.3	Wu M.; Hu X.-q.; Zhao H.; Zhu Y.-h.; Xu H.; Ping L.-f.; Wang X.-q.; Li Z. Field Residue Decline Study of Acephate and Methamidophos in Crop and Soil. Chinese Journal of Pesticide Science, 2009, 11(1), 114-120.
9	Acephate	O,S-dimethyl acetylphosphoramidothioate	30560-19-1	Cotton	Gossypium hirsutum L.	India	Leaves	O	F	0.68	2.05	1.37	Battu R.S.; Sahoo S.K.; Jyot G. Persistence of Acephate and Cypermethrin on Cotton Leaves, Cottonseed, Lint and Soil. Bulletin of Environmental Contamination and Toxicology, 2009, 82(1), 124-128.
9	Acephate	O,S-dimethyl acetylphosphoramidothioate	30560-19-1	Cotton	Gossypium hirsutum L.	AZ, USA	Leaves	O	F	1.7	1.7	1.7	Willis G.H.; McDowell L.L. Pesticide persistence on foliage. Reviews of Environmental Contamination and Toxicology, 1987, 100, 23-73.
9	Acephate	O,S-dimethyl acetylphosphoramidothioate	30560-19-1	Cotton	Gossypium hirsutum L.	TX, USA	Leaves	O	F	0.7	0.7	0.7	Willis G.H.; McDowell L.L. Pesticide persistence on foliage. Reviews of Environmental Contamination and Toxicology, 1987, 100, 23-73.
9	Acephate	O,S-dimethyl acetylphosphoramidothioate	30560-19-1	Cucumber	Cucumis sativus L. var. Poinsett-76	KY, USA	Fruit	I	U	3.68	3.68	3.68	Antonious G.F. Analysis and fate of acephate and its metabolite, methamidophos, in pepper and cucumber. Journal of Environmental Science and Health, 1995, 30(3), 377-399.
9	Acephate	O,S-dimethyl acetylphosphoramidothioate	30560-19-1	Cucumber	Cucumis sativus L. var. Poinsett-76	KY, USA	Leaves	I	U	5.17	5.17	5.17	Antonious G.F. Analysis and fate of acephate and its metabolite, methamidophos, in pepper and cucumber. Journal of Environmental Science and Health, 1995, 30(3), 377-399.
9	Acephate	O,S-dimethyl acetylphosphoramidothioate	30560-19-1	Douglas fir	Pseudotsuga menziesii	Canada	Needles	I	F	2.8	3.3	3.05	Willis G.H.; McDowell L.L. Pesticide persistence on foliage. Reviews of Environmental Contamination and Toxicology, 1987, 100, 23-73.
9	Acephate	O,S-dimethyl acetylphosphoramidothioate	30560-19-1	Grapefruit	Citrus × paradisi	USA	Leaves	I	X (urban setting)	5.31	13.8	9.56	Fitzpatrick G.E.; Bogan M.D. Residue dynamics of acephate and methamidophos in urban dooryard citrus foliage, Pompano Beach, Florida - August-September 1978. Pesticides Monitoring Journal, 1980, 14(1), 3-6.
9	Acephate	O,S-dimethyl acetylphosphoramidothioate	30560-19-1	Lemon	Citrus x limon	CA, USA	Leaves	O	F	8.2	8.2	8.2	Willis G.H.; McDowell L.L. Pesticide persistence on foliage. Reviews of Environmental Contamination and Toxicology, 1987, 100, 23-73.
9	Acephate	O,S-dimethyl acetylphosphoramidothioate	30560-19-1	Lemon	Citrus x limon	China	Fruit	I	F	8.2	8.2	8.2	Wu M.; Hu X.-Q.; Zhao H.; Zhu Y.-H.; Xu H.; Ping L.-F.; Wang X.-Q.; Li Z. Field Residue Decline Study of Acephate and Methamidophos in Crop and Soil. Chinese Journal of Pesticide Science, 2009, 11(1), 114-120.
9	Acephate	O,S-dimethyl acetylphosphoramidothioate	30560-19-1	Mango	Mangifera indica L.	India	Skin	I	F	4.75	4.88	4.82	Mohapatra S.; Ahuja A.K.; Deepa M.; Sharma D. Residues of Acephate and its Metabolite Methamidophos in/on Mango Fruit (Mangifera indica L.). Bulletin of Environmental Contamination and Toxicology, 2011, 86(1), 101-104. Calcuated.
9	Acephate	O,S-dimethyl acetylphosphoramidothioate	30560-19-1	Mung bean	Vigna radiata L. var. Wilczek	India	Leaves	I	F	2.98	3.27	3.13	Kuma R.; Mandal K.; Taggar G.K.; Singh R.; Singh B. Bioefficacy and persistence of acephate in mungbean Vigna radiata (L.) Wilczek. Environmental Monitoring and Assessment, 2016, 188(7), 1-9.
9	Acephate	O,S-dimethyl acetylphosphoramidothioate	30560-19-1	Nectarine	Prunus persica var. Nucipersica (Del Rio Rey)	China	Fruit	O	F	4.1	5.5	4.8	Wu X.; Xue J.; Pan D.; Jin L.; Shi T.; Cheng X.; ... Hua R. Dissipation and Residue of Acephate and Its Metabolite Metamidophos in Peach and Pear Under Field Conditions. International Journal of Environmental Research, 2017, 11(2), 133-139.
9	Acephate	O,S-dimethyl acetylphosphoramidothioate	30560-19-1	Olive	Olea europaea	Italy	Fruit	I	F	12	12.7	12.35	Cabras P.; Angioni A.; Garau V.L.; Pirisi F.M.; Cabitza F.; Pala, M. Acephate and buprofezin residues in olives and olive oil. Food Additives and Contaminants, 2000, 17(10), 855-858.
9	Acephate	O,S-dimethyl acetylphosphoramidothioate	30560-19-1	Orange	Citrus x sinensis	FL, USA	Leaves	I	F	3.5	3.5	3.5	Willis G.H.; McDowell L.L. Pesticide persistence on foliage. Reviews of Environmental Contamination and Toxicology, 1987, 100, 23-73.
9	Acephate	O,S-dimethyl acetylphosphoramidothioate	30560-19-1	Orange	Citrus x sinensis	USA	Leaves	I	X (urban setting)	5.31	13.8	9.56	Fitzpatrick G.E.; Bogan M.D. Residue dynamics of acephate and methamidophos in urban dooryard citrus foliage, Pompano Beach, Florida - August-September 1978. Pesticides Monitoring Journal, 1980, 14(1), 3-6.
9	Acephate	O,S-dimethyl acetylphosphoramidothioate	30560-19-1	Orange	Citrus x sinensis	USA	Leaves	O	F	8.2	8.2	8.2	Hadjidemetriou D.G.; Iwata Y.; Gunther F.A. Analysis and dissipation of dislodgable residues of acephate, dimethoate and formetanate hydrochloride on citrus foliage. Pesticide Science, 1985, 16(3), 302-310.
9	Acephate	O,S-dimethyl acetylphosphoramidothioate	30560-19-1	Orange	Citrus x sinensis	USA	Peel	I	F	8.7	8.7	8.7	Iwata Y.; Walker G.P.; O'neal J.R.; Barkley J.H. Residues of acephate, amitraz, chlorpyrifos and formetanate hydrochloride on and in fruits after low-volume applications to orange trees. Pesticide Science, 1985, 16(2), 172-178.
9	Acephate	O,S-dimethyl acetylphosphoramidothioate	30560-19-1	Pakchoi	Brassica rapa subsp. chinensis	China	Leaves	I	F	1.36	1.36	1.36	Tao C.; Li D.; Zhang X.; Chen S.; Fu L.; Piao X.; Shi J.; Jiang H.; Li C.; Li J. Residue analysis of acephate and its metabolite methamidophos in open field and greenhouse pakchoi (Brassica campestris L.) by gas chromatography-tandem mass. Environmental Monitoring and Assessment, 2010, 165(1), 685-692.
9	Acephate	O,S-dimethyl acetylphosphoramidothioate	30560-19-1	Pakchoi	Brassica rapa subsp. chinensis	China	Leaves	I	U	1.07	1.07	1.07	Tao C.; Li D.; Zhang X.; Chen S.; Fu L.; Piao X.; Shi J.; Jiang H.; Li C.; Li J. Residue analysis of acephate and its metabolite methamidophos in open field and greenhouse pakchoi (Brassica campestris L.) by gas chromatography-tandem mass. Environmental Monitoring and Assessment, 2010, 165(1), 685-692.
9	Acephate	O,S-dimethyl acetylphosphoramidothioate	30560-19-1	Peach	Prunus persica	Brazil	Fruit	I	F	12	12	12	Minelli E.V.; Angioni A.; Cabras P.; Garau,V.L.; Melis M.; Pirisi F.M.; Cabitza F.; Cubeddu M. Persistence of some pesticides in peach fruit. Italian Journal of Food Science, 1996, 8(1), 57-62.
9	Acephate	O,S-dimethyl acetylphosphoramidothioate	30560-19-1	Peach	Prunus persica	China	Fruit	O	F	4.1	5.5	4.8	Wu X.; Xue J.; Pan D.; Jin L.; Shi T.; Cheng X.; ... Hua R. Dissipation and Residue of Acephate and Its Metabolite Metamidophos in Peach and Pear Under Field Conditions. International Journal of Environmental Research, 2017, 11(2), 133-139.
9	Acephate	O,S-dimethyl acetylphosphoramidothioate	30560-19-1	Pear	Pyrus communis	China	Fruit	O	F	8.5	8.5	8.5	Wu X.; Xue J.; Pan D.; Jin L.; Shi T.; Cheng X.; ... Hua R. Dissipation and Residue of Acephate and Its Metabolite Metamidophos in Peach and Pear Under Field Conditions. International Journal of Environmental Research, 2017, 11(2), 133-139.
9	Acephate	O,S-dimethyl acetylphosphoramidothioate	30560-19-1	Pepper (chilli)	Capsicum annuum Linn.	India	Fruit	I	F	1.88	1.88	1.88	Kumar K.P.; Reddy D.J.; Reddy K.N.; Babu T.R.; Narendranath V.V. Dissipation and Decontamination of Triazophos and Acephate Residues in Chilli (Capsicum annum Linn). Pesticide Research Journal, 2000, 12(1), 26-29.
9	Acephate	O,S-dimethyl acetylphosphoramidothioate	30560-19-1	Pepper (bell)	Capsicum annuum var. Lady bell	KY, USA	Leaves	I	U	4.8	4.8	4.8	Antonious G.F. Analysis and fate of acephate and its metabolite, methamidophos, in pepper and cucumber. Journal of Environmental Science and Health, 1995, 30(3), 377-399.
9	Acephate	O,S-dimethyl acetylphosphoramidothioate	30560-19-1	Pepper (bell)	Capsicum annuum var. Lady bell	Ky, USA	Fruit	I	U	6.04	6.04	6.04	Antonious G.F. Analysis and fate of acephate and its metabolite, methamidophos, in pepper and cucumber. Journal of Environmental Science and Health, 1995, 30(3), 377-399.
9	Acephate	O,S-dimethyl acetylphosphoramidothioate	30560-19-1	Radish	Raphanus sativus	China	Leaves	I	F	3.2	11.6	7.4	Wu M.; Hu X.-Q.; Zhao H.; Zhu Y.-H.; Xu H.; Ping L.-F.; Wang X.-Q.; Li Z. Field Residue Decline Study of Acephate and Methamidophos in Crop and Soil. Chinese Journal of Pesticide Science, 2009, 11(1), 114-120.
9	Acephate	O,S-dimethyl acetylphosphoramidothioate	30560-19-1	Rice	Oryza sativa	China	Leaves	I	F	3.4	4.8	4.1	Wu M.; Hu X.-Q.; Zhao H.; Zhu Y.-H.; Xu H.; Ping L.-F.; Wang X.-Q.; Li Z. Field Residue Decline Study of Acephate and Methamidophos in Crop and Soil. Chinese Journal of Pesticide Science, 2009, 11(1), 114-120.
9	Acephate	O,S-dimethyl acetylphosphoramidothioate	30560-19-1	Tomato	Lycopersicon esculentum	USA	Leaves	I	U	6.1	6.1	6.1	Antonious G.F.; Snyder J.C. Residues and half-lives of acephate, methamidophos, and pirimiphos-methyl in leaves and fruit of greenhouse-grown tomatoes. Bulletin of Environmental Contamination and Toxicology, 1994, 52(1), 141-148.
9	Acephate	O,S-dimethyl acetylphosphoramidothioate	30560-19-1	Tomato	Lycopersicon esculentum	USA	Fruit	I	U	5.8	5.8	5.8	Antonious G.F.; Snyder J.C. Residues and half-lives of acephate, methamidophos, and pirimiphos-methyl in leaves and fruit of greenhouse-grown tomatoes. Bulletin of Environmental Contamination and Toxicology, 1994, 52(1), 141-148.
9	Acephate	O,S-dimethyl acetylphosphoramidothioate	30560-19-1	Tomato	Lycopersicon esculentum Mill. cv. Ohio MR-12	Ohio, USA	Fruit	O	U	2.9	2.9	2.9	Lindquist R.K.; Krueger H.R. Application of acephate to greenhouse tomatoes: External vs. internal foliage residues, and vegetable leafminer control. Journal of Economic Entomology, 1975, 68(1), 122-123. Calculated.
9	Acephate	O,S-dimethyl acetylphosphoramidothioate	30560-19-1	Tomato	Lycopersicon esculentum Mill. cv. Ohio MR-12	Ohio, USA	Leaves	O	U	2.9	2.9	2.9	Lindquist R.K.; Krueger H.R. Application of acephate to greenhouse tomatoes: External vs. internal foliage residues, and vegetable leafminer control. Journal of Economic Entomology, 1975, 68(1), 122-123. Calculated.
11	Acetamidprid	(1E)-N-[(6-chloro-3-pyridinyl)methyl]-N'-cyano-N-methylethanimidamide	135410-20-7	Apple	Malus pumila Mill.	China	Fruit	I	F	2.2	5.1	3.65	Liu X.-G.; Dong F.-S.; Yang S.; Zheng Y.-Q.; Yao, J.-R. Residues and Degradation of Mospilan in Apple and Soil. Agrochemicals, 2007, 46(10), 693-695.
11	Acetamidprid	(1E)-N-[(6-chloro-3-pyridinyl)methyl]-N'-cyano-N-methylethanimidamide	135410-20-7	Cherry (sweet)	Prunus avium	Serbia	Fruit	I	F	3.15	3.15	3.15	Lazić S.; Šunjka D.; Panić S.; Bjelica Z.; Vuković S. Dissipation rate and residues of acetamiprid and iprodion in sweet cherry fruit. Agroforestry, 2016, 1, 1, http://dx.doi.org/10.7251/AGRENG1601143L
11	Acetamidprid	(1E)-N-[(6-chloro-3-pyridinyl)methyl]-N'-cyano-N-methylethanimidamide	135410-20-7	Chinese cabbage	Brassica rapa subsp. pekinensis	China	Leaves	O	F	5.2	19.3	12.25	Yu Q.; Qin S.; Wang X.; Qiao X.-W. Dissipation of Acetamiprid and Imidacloprid Under Different Temperature, Light and Biological Factors on Phyllosphere of Brassica chinensis. Chinese Journal of Pesticide Science, 2006, 8(2), 147-151.
11	Acetamidprid	(1E)-N-[(6-chloro-3-pyridinyl)methyl]-N'-cyano-N-methylethanimidamide	135410-20-7	Cowpea	Vigna unguiculata	Australia	Fruit	O	F	3	3	3	Soliman M.M.M. Persistence of New Insecticides and Their Efficacy Against Insect Pests of Cowpea. Australian Journal of Basic and Applied Sciences, 2011, 5(2), 82-89.
11	Acetamidprid	(1E)-N-[(6-chloro-3-pyridinyl)methyl]-N'-cyano-N-methylethanimidamide	135410-20-7	Eggplant	Solanum melongena L.	Egypt	Fruit	I	F	1.96	1.96	1.96	Romehsup A.A.; Hendawisup M.Y. Effect of processing on acetamiprid residues in eggplant fruits, Solanum melongena L. African Journal of Agricultural Research, 2013, 8(18), 2033-2037.
11	Acetamidprid	(1E)-N-[(6-chloro-3-pyridinyl)methyl]-N'-cyano-N-methylethanimidamide	135410-20-7	Eggplant	Solanum melongena L.	Egypt	Leaves	I	F	2.31	2.31	2.31	Romehsup A.A.; Hendawisup M.Y. Effect of processing on acetamiprid residues in eggplant fruits, Solanum melongena L. African Journal of Agricultural Research, 2013, 8(18), 2033-2037.
11	Acetamidprid	(1E)-N-[(6-chloro-3-pyridinyl)methyl]-N'-cyano-N-methylethanimidamide	135410-20-7	Grape	Vitis vinifera L. cv. Savignon Blanc	Chile	Fruit	I	F	12.1	12.1	12.1	Alister C.; Araya M.; Morandé J.E.; Volosky C.; Torrico J.S.; Cordova A.; Kogan M. Effects of wine grape cultivar, application conditions and the winemaking process on the dissipation of six pesticides. Ciencia e investigación agraria: revista latinoamericana de ciencias de la agricultura, 2014, 41(3), 375-386
11	Acetamidprid	(1E)-N-[(6-chloro-3-pyridinyl)methyl]-N'-cyano-N-methylethanimidamide	135410-20-7	Grape	Vitis vinifera L. cv. Pilot Noir	Chile	Fruit	I	F	15.4	15.4	15.4	Alister C.; Araya M.; Morandé J.E.; Volosky C.; Torrico J.S.; Cordova A.; Kogan M. Effects of wine grape cultivar, application conditions and the winemaking process on the dissipation of six pesticides. Ciencia e investigación agraria: revista latinoamericana de ciencias de la agricultura, 2014, 41(3), 375-386
11	Acetamidprid	(1E)-N-[(6-chloro-3-pyridinyl)methyl]-N'-cyano-N-methylethanimidamide	135410-20-7	Mustard	Brassica juncea L.	nd	Leaves	I	F	1.02	1.59	1.3	Cited in: Gupta M.; Shanker A. Persistence of acetamiprid in tea and its transfer from made tea to infusion. Food Chemistry, 2008, 111(4), 805-810.
11	Acetamidprid	(1E)-N-[(6-chloro-3-pyridinyl)methyl]-N'-cyano-N-methylethanimidamide	135410-20-7	Okra	Abelmoschus esculentus L.	India	Fruit	I	F	2.3	2.3	2.3	Singh S.B.; Kulshrestha G. Residues of Thiamethoxam and Acetamiprid, Two Neonicotinoid Insecticides, in/on Okra Fruits (Abelmoschus esculentus L). Bulletin of Environmental Contamination and Toxicology, 2005, 75(5), 945-951.
11	Acetamidprid	(1E)-N-[(6-chloro-3-pyridinyl)methyl]-N'-cyano-N-methylethanimidamide	135410-20-7	Parsley	Petroselinum crispum	Egypt	Leaves	I	F	2.68	2.68	2.68	Abdallah O.; Abdel Ghani S.; Hrouzková S. Development of validated LC-MS/MS method for imidacloprid and acetamiprid in parsley and rocket and evaluation of their dissipation dynamics. Journal of Liquid Chromatography & Related Technologies, 2017, 1-8.
11	Acetamidprid	(1E)-N-[(6-chloro-3-pyridinyl)methyl]-N'-cyano-N-methylethanimidamide	135410-20-7	Peach	Prunus persica	Uruguay	Fruit	I	X (under rainshield)	8.77	8.77	8.77	Galietta G.; Egaña E.; Gemelli F.; Maeso D.; Casco N.; Conde P.; Nueñz S. Pesticide dissipation curves in peach, pear and tomato crops in Uruguay. Journal of Environmental Science and Health, 2011, 46(1), 35-40. Calcuated.
11	Acetamidprid	(1E)-N-[(6-chloro-3-pyridinyl)methyl]-N'-cyano-N-methylethanimidamide	135410-20-7	Pepper (chilli)	Capsicum annuum L.	India	Fruit	O	F	2.24	4.84	3.54	Sanyal D.; Chakma D.; Alam S. Persistence of a Neonicotinoid Insecticide, Acetamiprid on Chili (Capsicum annum L.). Bulletin of Environmental Contamination and Toxicology, 2008, 81(4), 365-368.
11	Acetamidprid	(1E)-N-[(6-chloro-3-pyridinyl)methyl]-N'-cyano-N-methylethanimidamide	135410-20-7	Rocket	Eruca sativa	Egypt	Leaves	I	F	4.24	4.24	4.24	Abdallah O.; Abdel Ghani S.; Hrouzková S. Development of validated LC-MS/MS method for imidacloprid and acetamiprid in parsley and rocket and evaluation of their dissipation dynamics. Journal of Liquid Chromatography & Related Technologies, 2017, 1-8.
11	Acetamidprid	(1E)-N-[(6-chloro-3-pyridinyl)methyl]-N'-cyano-N-methylethanimidamide	135410-20-7	Qat	Citrus japonica	Between Yemen and Saudi Arabia	Leaves	I	F	11.7	11.7	11.7	Al-Rajab A.J.; Alhababy A.M.; Alfaifi,T. Persistence of imidacloprid, acetamiprid and methomyl in qat leaves. Hellenic Plant Protection Journal, 2016, 9(2), 51-59
11	Acetamidprid	(1E)-N-[(6-chloro-3-pyridinyl)methyl]-N'-cyano-N-methylethanimidamide	135410-20-7	Soybean	Glycine max	China	Whole plant	I	F	4.9	5.1	5	Guo J.-H.; Cai E.-X.; Shi T.-H.; Zhang Q.-H. Residual Degradation Dynamics and Safe Usage Technology of Acetamiprid in Vegetable Soybean. Agrochemicals, 2008, 47(9), 670-673.
11	Acetamidprid	(1E)-N-[(6-chloro-3-pyridinyl)methyl]-N'-cyano-N-methylethanimidamide	135410-20-7	Spinach	Spinacia oleracea L. var. Bloomsdale	CA, USA	Seedling leaves	I	U	10	10	10	Ford K.A.; Casida J.E. Comparative Metabolism and Pharmacokinetics of Seven Neonicotinoid Insecticides in Spinach. Journal of Agricultural and Food Chemistry, 2008, 56(21), 10168-10175.
11	Acetamidprid	(1E)-N-[(6-chloro-3-pyridinyl)methyl]-N'-cyano-N-methylethanimidamide	135410-20-7	Tea	Camellia sinensis	India	Shoots	I	F	1.82	2.33	2.08	Gupta M.; Shanker A. Persistence of acetamiprid in tea and its transfer from made tea to infusion. Food Chemistry, 2008, 111(4), 805-810.
11	Acetamidprid	(1E)-N-[(6-chloro-3-pyridinyl)methyl]-N'-cyano-N-methylethanimidamide	135410-20-7	Tea	Camellia sinensis	India	Leaves	I	F	1.84	2.25	2.05	Gupta M.; Shanker A. Persistence of acetamiprid in tea and its transfer from made tea to infusion. Food Chemistry, 2008, 111(4), 805-810.
11	Acetamidprid	(1E)-N-[(6-chloro-3-pyridinyl)methyl]-N'-cyano-N-methylethanimidamide	135410-20-7	Tea	Camellia sinensis	India	Leaves	I	F	2.8	14.1	8.5	Cited in: Gupta M.; Shanker A. Persistence of acetamiprid in tea and its transfer from made tea to infusion. Food Chemistry, 2008, 111(4), 805-810.
11	Acetamidprid	(1E)-N-[(6-chloro-3-pyridinyl)methyl]-N'-cyano-N-methylethanimidamide	135410-20-7	Zucchini	Cucurbita pepo. Zucchini	Republic of Korea	Fruit	I	U	1.87	1.94	1.91	Park J.-Y.; Choi J.-H.; Kim B.-M.; Park J.-H.; Cho S.-K.; Ghafar M.W.; Abd El-Aty A.M.; Shim J.-H. Determination of acetamiprid residues in zucchini grown under greenhouse conditions: application to behavioral dynamics. Biomedical Chromatography, 2011, 25(1-2), 136-46
11	Acetamidprid	(1E)-N-[(6-chloro-3-pyridinyl)methyl]-N'-cyano-N-methylethanimidamide	135410-20-7	Zucchini	Cucurbita pepo. Zucchini	Republic of Korea	Leaves	I	U	2	2.54	2.27	Park J.-Y.; Choi J.-H.; Kim B.-M.; Park J.-H.; Cho S.-K.; Ghafar M.W.; Abd El-Aty A.M.; Shim J.-H. Determination of acetamiprid residues in zucchini grown under greenhouse conditions: application to behavioral dynamics. Biomedical Chromatography, 2011, 25(1-2), 136-46
12	Acetochlor	2-chloro-N-(ethoxymethyl)-N-(2-ethyl-6-methylphenyl)acetamide	34256-82-1	Rice	Oryza sativa	China	Whole plant	I	F	1.21	2.07	1.64	Li H., Yang R.-B., Sheng L.-S., Fu, Q. Residue and Field Decline Study of Acetochlor in Rice Field. Chinese Journal of Pesticide Science, 2009, 11(2), 269-273.
10	Acequinocyl	2-(acetyloxy)-3-dodecyl-1,4-naphthalenedione	57960-19-7	Perilla	Perilla frutescens	Republic of Korea	Leaves	I	U	2.8	3.1	1.64	Na T.W.; Rahman M.M.; Park J.H.; Yang A.; Park K.H.; Abd El-Aty A.M.; Shim J.H. Residual pattern of acequinocyl and hydroxyacequinocyl in perilla leaf grown under greenhouse conditions using ultra performance liquid chromatography-photo diode array detector with tandem mass confirmation. Journal of the Korean Society for Applied Biological Chemistry, 2012, 55(5), 657-662.
16	Acrinathrin	(S)-cyano(3-phenoxyphenyl)methyl (1R,3S)-2,2-dimethyl-3-[(1Z)-3-oxo-3-[2,2,2-trifluoro-1-(trifluoromethyl)ethoxy]-1-propenyl]cyclopropanecarboxylate	101007-06-1	Green bean	Phaseolus vulgaris	Spain	Fruit	I	U	0.98	0.98	0.98	Martinez Galera M.; Gil Garcia M.D.; Rodriguez Lallena J.A.; Lopez Lopez T.; Martinez Vidal, J.L. Dissipation of pyrethroid residues in peppers, zucchinis, and green beans exposed to field treatments in greenhouses: evaluation by decline curves. Journal of Agricultural and Food Chemistry, 2003, 51(19), 5745-5751.
16	Acrinathrin	(S)-cyano(3-phenoxyphenyl)methyl (1R,3S)-2,2-dimethyl-3-[(1Z)-3-oxo-3-[2,2,2-trifluoro-1-(trifluoromethyl)ethoxy]-1-propenyl]cyclopropanecarboxylate	101007-06-1	Pepper	Capsicum spp.	Spain	Fruit	I	U	0.77	2.08	1.43	Martinez Galera M.; Gil Garcia M.D.; Rodriguez Lallena J.A.; Lopez Lopez T.; Martinez Vidal, J.L. Dissipation of pyrethroid residues in peppers, zucchinis, and green beans exposed to field treatments in greenhouses: evaluation by decline curves. Journal of Agricultural and Food Chemistry, 2003, 51(19), 5745-5751.
16	Acrinathrin	(S)-cyano(3-phenoxyphenyl)methyl (1R,3S)-2,2-dimethyl-3-[(1Z)-3-oxo-3-[2,2,2-trifluoro-1-(trifluoromethyl)ethoxy]-1-propenyl]cyclopropanecarboxylate	101007-06-1	Pepper	Capsicum spp.	Republic of Korea	Fruit	I	U	6.76	7.11	6.94	Hem L.; Shin E.-H.; Khay S.; Park J.-H.; Park J.-Y.; Shim J.-H. Dissipation Patterns of Acrinathrin, Dinotefuran, Fenhexamid, Methoxyfenozide and Tetradifon in Pepper Grown under Greenhouse Conditions. Chonnam National University, South Korea, 2008
16	Acrinathrin	(S)-cyano(3-phenoxyphenyl)methyl (1R,3S)-2,2-dimethyl-3-[(1Z)-3-oxo-3-[2,2,2-trifluoro-1-(trifluoromethyl)ethoxy]-1-propenyl]cyclopropanecarboxylate	101007-06-1	Zucchini	Cucurbita pepo. Zucchini	Spain	Fruit	I	U	1.01	1.32	1.17	Martinez Galera M.; Gil Garcia M.D.; Rodriguez Lallena J.A.; Lopez Lopez T.; Martinez Vidal, J.L. Dissipation of pyrethroid residues in peppers, zucchinis, and green beans exposed to field treatments in greenhouses: evaluation by decline curves. Journal of Agricultural and Food Chemistry, 2003, 51(19), 5745-5751.
19	Aldicarb	2-methyl-2-(methylthio)propanal O-[(methylamino)carbonyl]oxime	116-06-3	Apple	Malus pumila Mill.	*	Flesh	I	*	4.8	4.8	4.8	Stuart I.A.; Ansell R.O.; MacLachlan J.; Bather P.A. Surface partitioning studies of N-methylcarbamate-treated post-harvest crops using SFE-HPLC-postcolumn reaction-fluorescence. The Analyst, 1999, 124(3), 275-280.
19	Aldicarb	2-methyl-2-(methylthio)propanal O-[(methylamino)carbonyl]oxime	116-06-3	Apple	Malus pumila Mill.	*	Peel	I	*	4.8	4.8	4.8	Stuart I.A.; Ansell R.O.; MacLachlan J.; Bather P.A. Surface partitioning studies of N-methylcarbamate-treated post-harvest crops using SFE-HPLC-postcolumn reaction-fluorescence. The Analyst, 1999, 124(3), 275-280.
19	Aldicarb	2-methyl-2-(methylthio)propanal O-[(methylamino)carbonyl]oxime	116-06-3	Banana	Musa spp.	*	Flesh	I	*	4	4	4	Stuart I.A.; Ansell R.O.; MacLachlan J.; Bather P.A. Surface partitioning studies of N-methylcarbamate-treated post-harvest crops using SFE-HPLC-postcolumn reaction-fluorescence. The Analyst, 1999, 124(3), 275-280.
19	Aldicarb	2-methyl-2-(methylthio)propanal O-[(methylamino)carbonyl]oxime	116-06-3	Banana	Musa spp.	*	Peel	I	*	6.5	6.5	6.5	Stuart I.A.; Ansell R.O.; MacLachlan J.; Bather P.A. Surface partitioning studies of N-methylcarbamate-treated post-harvest crops using SFE-HPLC-postcolumn reaction-fluorescence. The Analyst, 1999, 124(3), 275-280.
19	Aldicarb	2-methyl-2-(methylthio)propanal O-[(methylamino)carbonyl]oxime	116-06-3	Cotton	Gossypium hirsutum L. var. Deltapine-Smoothleaf	TX, USA	Leaves	I	U	1	1	1	Coppedge J.R.; Lindquist D.A.; Bull D.L.; Dorough H.W. Fate of 2-methyl-2-(methylthio) propionaldehyde O-(methylcarbamoyl) oxime (Temik) in cotton plants and soil. Journal of Agricultural and Food Chemistry, 1967, 15(5), 902-910.
19	Aldicarb	2-methyl-2-(methylthio)propanal O-[(methylamino)carbonyl]oxime	116-06-3	Cotton	Gossypium hirsutum L. var. Deltapine-Smoothleaf		Leaves	I	U	12.6	12.6	12.6	Andrawes N.R.; Romine R.R.; Bagley W.P. Metabolism and residues of Temik aldicarb pesticide in cotton foliage and seed under field conditions. Journal of Agricultural and Food Chemistry, 1973, 21(3),379-386. Calculated
19	Aldicarb	2-methyl-2-(methylthio)propanal O-[(methylamino)carbonyl]oxime	116-06-3	Onion	Allium cepa	*	Flesh	I	*	5.8	5.8	5.8	Stuart I.A.; Ansell R.O.; MacLachlan J.; Bather P.A. Surface partitioning studies of N-methylcarbamate-treated post-harvest crops using SFE-HPLC-postcolumn reaction-fluorescence. The Analyst, 1999, 124(3), 275-280.
19	Aldicarb	2-methyl-2-(methylthio)propanal O-[(methylamino)carbonyl]oxime	116-06-3	Onion	Allium cepa	*	Fruit skin	I	*	4	4	4	Stuart I.A.; Ansell R.O.; MacLachlan J.; Bather P.A. Surface partitioning studies of N-methylcarbamate-treated post-harvest crops using SFE-HPLC-postcolumn reaction-fluorescence. The Analyst, 1999, 124(3), 275-280.
19	Aldicarb	2-methyl-2-(methylthio)propanal O-[(methylamino)carbonyl]oxime	116-06-3	Pear	Pyrus communis	*	Flesh	I	*	6.7	6.7	6.7	Stuart I.A.; Ansell R.O.; MacLachlan J.; Bather P.A. Surface partitioning studies of N-methylcarbamate-treated post-harvest crops using SFE-HPLC-postcolumn reaction-fluorescence. The Analyst, 1999, 124(3), 275-280.
19	Aldicarb	2-methyl-2-(methylthio)propanal O-[(methylamino)carbonyl]oxime	116-06-3	Pear	Pyrus communis	*	Fruit skin	I	*	5.1	5.1	5.1	Stuart I.A.; Ansell R.O.; MacLachlan J.; Bather P.A. Surface partitioning studies of N-methylcarbamate-treated post-harvest crops using SFE-HPLC-postcolumn reaction-fluorescence. The Analyst, 1999, 124(3), 275-280.
19	Aldicarb	2-methyl-2-(methylthio)propanal O-[(methylamino)carbonyl]oxime	116-06-3	Potato	Solanum tuberosum L. var. Cobbler	NC, USA	Leaves	I	F	1	1	1	Andrawes N.R.; Bagley W.P.; Herrett R.A. Metabolism of 2-methyl-2-(methylthio) propionaldehyde O-(methylcarbamoyl) oxime (Temik aldicarb pesticide) in potato plants. Journal of Agricultural and Food Chemistry, 1971, 19(4), 731-737.
19	Aldicarb	2-methyl-2-(methylthio)propanal O-[(methylamino)carbonyl]oxime	116-06-3	Potato	Solanum tuberosum	*	Tuber flesh	I	*	5.9	5.9	5.9	Stuart I.A.; Ansell R.O.; MacLachlan J.; Bather P.A. Surface partitioning studies of N-methylcarbamate-treated post-harvest crops using SFE-HPLC-postcolumn reaction-fluorescence. The Analyst, 1999, 124(3), 275-280.
19	Aldicarb	2-methyl-2-(methylthio)propanal O-[(methylamino)carbonyl]oxime	116-06-3	Potato	Solanum tuberosum	*	Tuber skin	I	*	5.2	5.2	5.2	Stuart I.A.; Ansell R.O.; MacLachlan J.; Bather P.A. Surface partitioning studies of N-methylcarbamate-treated post-harvest crops using SFE-HPLC-postcolumn reaction-fluorescence. The Analyst, 1999, 124(3), 275-280.
19	Aldicarb	2-methyl-2-(methylthio)propanal O-[(methylamino)carbonyl]oxime	116-06-3	Sugarbeet	Beta vulgaris subsp. vulgaris convar. vulgaris var. altissima	Belgium	Leaves	I	F	6.13	12.6	9.37	Dejonckheere W.; Melkebeke G.; Steurbaut W.; Kips R.H. Uptake and residues of aldicarb in sugarbeet leaves. Pesticide Science, 1982, 13(4), 341-350. Calcuated.
20	Aldoxycarb	2-methyl-2-(methylsulfonyl)propanal O-[(methylamino)carbonyl]oxime	1646-88-4	Sugarbeet	Beta vulgaris subsp. vulgaris convar. vulgaris var. altissima	Belgium	Leaves	I	F	6.73	23.1	14.92	Dejonckheere W.; Melkebeke G.; Steurbaut W.; Kips R.H. Uptake and residues of aldicarb in sugarbeet leaves. Pesticide Science, 1982, 13(4), 341-350.
21	Aldrin	(1R,4S,4aS,5S,8R,8aR)-rel-1,2,3,4,10,10-hexachloro-1,4,4a,5,8,8alpha-hexahydro-1,4:5,8-dimethanonaphthalene	309-00-2	Alfalfa	Medicago sativa	WI, USA	Leaves	I	F	1.7	1.7	1.7	Willis G.H.; McDowell L.L. Pesticide persistence on foliage. Reviews of Environmental Contamination and Toxicology, 1987, 100, 23-73.
21	Aldrin	(1R,4S,4aS,5S,8R,8aR)-rel-1,2,3,4,10,10-hexachloro-1,4,4a,5,8,8alpha-hexahydro-1,4:5,8-dimethanonaphthalene	309-00-2	Apple	Malus pumila Mill.	UK	Leaves	O	F	7	7	7	Harrison R.B.; Holmes D.C.; Roburn J.; Tatton J.O.G. The fate of some organochlorine pesticides on leaves. Journal of the Science of Food and Agriculture, 1967, 18, 10–15.
23	Alloxydim	methyl 2,2-dimethyl-4,6-dioxo-5-[(1E)-1-[(2-propenyloxy)imino]butyl]cyclohexanecarboxylate	55634-91-8	Sugarbeet	Beta vulgaris subsp. vulgaris convar. vulgaris var. altissima	UK	Leaves	O	F	3	3	3	Harrison R.B.; Holmes D.C.; Roburn J.; Tatton J.O.G. The fate of some organochlorine pesticides on leaves. Journal of the Science of Food and Agriculture, 1967, 18, 10–15.
24	Alpha cypermethrin	(R)-cyano(3-phenoxyphenyl)methyl (1S,3S)-rel-3-(2,2-dichloroethenyl)-2,2-dimethylcyclopropanecarboxylate	67375-30-8	Mustard	Brassica Campestris Linn	India	Leaves	I	F	2.3	8.7	5.5	Kumar R.; Dikshit A.K. Studies on the Metabolism of Alphamethrin - A Pyrethroid Insecticide, in Mustard (Brassica Campestris Linn.). Pesticide Research Journal, 2002, 14(2), 313-318.
24	Alpha-cypermetrin	(R)-cyano(3-phenoxyphenyl)methyl (1S,3S)-rel-3-(2,2-dichloroethenyl)-2,2-dimethylcyclopropanecarboxylate	67375-30-8	Mustard (white)	Sinapis alba L.	Poland	Above ground plant	I	F	3.1	4.6	3.85	Słowik-Borowiec M. Dissipation kinetics of alpha-cypermethrin and lambda-cyhalothrin residues in aboveground part of white mustard (Sinapis alba L.). Journal of Environmental Science and Health, Part B, 2016, 51(9), 628-633.
24	Alpha cypermethrin	(R)-cyano(3-phenoxyphenyl)methyl (1S,3S)-rel-3-(2,2-dichloroethenyl)-2,2-dimethylcyclopropanecarboxylate	67375-30-8	Tea	Camellia sinensis	India	Leaves	I	F	3.7	3.9	3.8	Barooah A.K.; Borthakur M.C. Residues of Alphamethrin in Tea and its Potential Daily Intake. Pesticide Research Journal, 1994, 6(2), 161-166.
24	Alpha cypermethrin	(R)-cyano(3-phenoxyphenyl)methyl (1S,3S)-rel-3-(2,2-dichloroethenyl)-2,2-dimethylcyclopropanecarboxylate	67375-30-8	Tea	Camellia sinensis	India	Shoots	I	F	3.5	3.8	3.65	Barooah A.K.; Borthakur M.C. Residues of Alphamethrin in Tea and its Potential Daily Intake. Pesticide Research Journal, 1994, 6(2), 161-166.
24	Alpha cypermethrin	(R)-cyano(3-phenoxyphenyl)methyl (1S,3S)-rel-3-(2,2-dichloroethenyl)-2,2-dimethylcyclopropanecarboxylate	67375-30-8	Tomato	Solanum lycopersicum cv. Caramba	Spain	Fruit	I	U	7.3	7.3	7.3	Juraske R.; Antón A.; Castells F. Estimating half-lives of pesticides in/on vegetation for use in multimedia fate and exposure models. Chemosphere, 2008, 70(10), 1748-1755.
1661	Alpha-Endosulfan	(3alpha,5alphabeta,6alpha,9alpha,9alphabeta)-6,7,8,9,10,10-hexachloro-1,5,5alpha,6,9,9alpha-hexahydro-6,9-methano-2,4,3-benzodioxathiepin 3-oxide	959-98-8	Chickpea	Cicer arietinum var. Mahamaya	India	Leaves	I	F	2.63	2.78	2.71	Chowdhury A.G.; Das C.; Kole R.K.; Banerjee H.; Bhattacharyya A. Residual fate and persistence of endosulfan (50 WDG) in Bengal gram (Cicer arietinum). Environmental Monitoring and Assessment, 2007, 132(1-3), 467-473.
1661	Alpha-Endosulfan	(3alpha,5alphabeta,6alpha,9alpha,9alphabeta)-6,7,8,9,10,10-hexachloro-1,5,5alpha,6,9,9alpha-hexahydro-6,9-methano-2,4,3-benzodioxathiepin 3-oxide	959-98-8	Eggplant	Solanum macrocarpon L.	West Africa	Leaves	O	F	0.7	0.7	0.7	Rosendahl I.; Laabs V.; Atcha-Ahowé C.; James B.; Amelung W. Insecticide dissipation from soil and plant surfaces in tropical horticulture of southern Benin, West Africa. Journal of Environmental Monitoring, 2009, 11, 1157-1164.
1661	Alpha-Endosulfan	(3alpha,5alphabeta,6alpha,9alpha,9alphabeta)-6,7,8,9,10,10-hexachloro-1,5,5alpha,6,9,9alpha-hexahydro-6,9-methano-2,4,3-benzodioxathiepin 3-oxide	959-98-8	Muskmelon	Cucumis melo	KY, USA	Fruit	O	F	0.95	0.95	0.95	Antonious G.; Hill R.; Ross K.; Coolong T. Dissipation, half-lives, and mass spectrometric identification of endosulfan isomers and the sulfate metabolite on three field-grown vegetables. Journal of Environmental Science and Health, 2002, 47(5), 369-378
1661	Alpha-Endosulfan	(3alpha,5alphabeta,6alpha,9alpha,9alphabeta)-6,7,8,9,10,10-hexachloro-1,5,5alpha,6,9,9alpha-hexahydro-6,9-methano-2,4,3-benzodioxathiepin 3-oxide	959-98-8	Pepper (chilli)	Capsicum annuum L. cv Bell Boy Hybrid	*	Fruit	O	*	1.47	1.58	1.53	Pokharkar D.S.; Dethe M.D. Gas‐liquid chromatographic studies on residues of endosulfan on chilli fruits. Journal of Environmental Science and Health, 1981, 16(4), 439-451.
1661	Alpha-Endosulfan	(3alpha,5alphabeta,6alpha,9alpha,9alphabeta)-6,7,8,9,10,10-hexachloro-1,5,5alpha,6,9,9alpha-hexahydro-6,9-methano-2,4,3-benzodioxathiepin 3-oxide	959-98-8	Pepper (sweet)	Capsicum annuum L. cv Bell Boy Hybrid	KY, USA	Leaves	O	F	0.6	3	1.8	Antonious G.F.; Byers M.E.; Snyder J.C. Residues and fate of endosulfan on field‐grown pepper and tomato. 1998, Pest Management Science, 54(1), 61-67.
1661	Alpha-Endosulfan	(3alpha,5alphabeta,6alpha,9alpha,9alphabeta)-6,7,8,9,10,10-hexachloro-1,5,5alpha,6,9,9alpha-hexahydro-6,9-methano-2,4,3-benzodioxathiepin 3-oxide	959-98-8	Pepper (sweet)	Capsicum annuum L. cv Bell Boy Hybrid	KY, USA	Fruit	I	F	1.22	1.22	1.22	Antonious G.F.; Byers M.E.; Snyder J.C. Residues and fate of endosulfan on field‐grown pepper and tomato. 1998, Pest Management Science, 54(1), 61-67.
1661	Alpha-Endosulfan	(3alpha,5alphabeta,6alpha,9alpha,9alphabeta)-6,7,8,9,10,10-hexachloro-1,5,5alpha,6,9,9alpha-hexahydro-6,9-methano-2,4,3-benzodioxathiepin 3-oxide	959-98-8	Tea	Camellia sinensis	India	Shoots	I	F	1.4	1.4	1.4	Barooah A.K.; Borthakur M. Dissipation of Pesticides in Tea Shoots and the Effect of Washing. Pesticide Research Journal, 2008, 20(1), 121-124.
1661	Alpha-Endosulfan	(3alpha,5alphabeta,6alpha,9alpha,9alphabeta)-6,7,8,9,10,10-hexachloro-1,5,5alpha,6,9,9alpha-hexahydro-6,9-methano-2,4,3-benzodioxathiepin 3-oxide	959-98-8	Tomato	Lycopersicon esculentum Mill. cv. Mountain Spring F1	KY, USA	Fruit	O	F	0.5	2.8	1.65	Antonious G.F.; Byers M.E.; Snyder J.C. Residues and fate of endosulfan on field‐grown pepper and tomato. 1998, Pest Management Science, 54(1), 61-67.
1661	Alpha-Endosulfan	(3alpha,5alphabeta,6alpha,9alpha,9alphabeta)-6,7,8,9,10,10-hexachloro-1,5,5alpha,6,9,9alpha-hexahydro-6,9-methano-2,4,3-benzodioxathiepin 3-oxide	959-98-8	Tomato	Lycopersicon esculentum Mill. cv. Mountain Spring F1	KY, USA	Leaves	O	F	0.8	3.5	2.15	Antonious G.F.; Byers M.E.; Snyder J.C. Residues and fate of endosulfan on field‐grown pepper and tomato. 1998, Pest Management Science, 54(1), 61-67.
1661	Alpha-Endosulfan	(3alpha,5alphabeta,6alpha,9alpha,9alphabeta)-6,7,8,9,10,10-hexachloro-1,5,5alpha,6,9,9alpha-hexahydro-6,9-methano-2,4,3-benzodioxathiepin 3-oxide	959-98-8	Tomato	Lycopersicon esculentum Mill. var. Power	Ghana	Leaves	I	F	0.16	0.16	0.2	Ntow W.J.; Ameyibor J.; Kelderman P.; Drechsel P.; Gijzen, H J. Dissipation of endosulfan in field-grown tomato (Lycopersicon esculentum) and cropped soil at Akumadan, Ghana. Journal of Agricultural and Food Chemistry, 2007, 55(26), 10864-10871.
1193	Aminocarb	4-(dimethylamino)-3-methylphenyl methylcarbamate	2032-59-9	Balsam fir	Abies balsamea	Canada	Needles	O	F	4.5	4.5	4.5	Sundaram K.M.; Szeto S.Y. Persistence of aminocarb in balsam fir foliage, forest litter, and soil after aerial application of three formulations. Journal of Agricultural and Food Chemistry, 1984, 32(5), 1138-1141.
1193	Aminocarb	4-(dimethylamino)-3-methylphenyl methylcarbamate	2032-59-9	Green bean	Phaseolus vulgaris	*	Whole plant	I	F	0.1	0.1	0.1	Kuhr R.J. Metabolism of carbamate insecticide chemicals in plants and insects. Journal of Agricultural and Food Chemistry, 1970, 18(6), 1023-1030.
1193	Aminocarb	4-(dimethylamino)-3-methylphenyl methylcarbamate	2032-59-9	White spruce	Picea glauca (Moench) Voss	Canada	Leaves	I	F	8.2	13.5	10.85	Sundaram K.M.S. A comparative evaluation of dislodgable and penetrated residues, and persistence characteristics of aminocarb and fenitrothion, following application of several formulations on to conifer trees. Journal of Environmental Science & Health Part B, 1986, 21(6), 539-560.
1193	Aminocarb	4-(dimethylamino)-3-methylphenyl methylcarbamate	2032-59-9	White spruce	Picea glauca (Moench) Voss	Canada	Leaves	O	F	12.3	26	19.2	Sundaram K.M.S. A comparative evaluation of dislodgable and penetrated residues, and persistence characteristics of aminocarb and fenitrothion, following application of several formulations on to conifer trees. Journal of Environmental Science & Health Part B, 1986, 21(6), 539-560.
1137	Amisulbrom	3-((3-bromo-6-fluoro-2-methyl-1H-indol-1-yl)sulfonyl)-N,N-dimethyl-1H-1,2,4-triazole-1-sulfonamide	348635-87-0	Cabbage (winter grown)	Brassica oleracea capitata	Republic of Korea	Leaves	O	F	3.7	4.1	3.9	Ahn K.G.; Kim G.H.; Kim G.P.; Kim M.J.; Hong S.B.; Hwang, Y.S.; ... Choung M.G. Establishment of Pre-Harvest Residue Limit (PHRL) of the Fungicide Amisulbrom during Cultivation of Winter-Grown Cabbage. Korean Journal of Environmental Agriculture, 2015, 34(2), 120-127.
1137	Amisulbrom	3-((3-bromo-6-fluoro-2-methyl-1H-indol-1-yl)sulfonyl)-N,N-dimethyl-1H-1,2,4-triazole-1-sulfonamide	348635-87-0	Cucumber	Cucumis sativus	Republic of Korea	Fruit	I	U	2.4	3.6	3	Hwang K.W.; Kim T.W.; Yoo J.H.; Park B.S.; Moon J.K. Dissipation pattern of amisulbrom in cucumber under greenhouse condition for establishing pre-harvest residue limit. The Korean Journal of Pesticide Science, 2012, 16(4), 288-293.
1137	Amisulbrom	3-((3-bromo-6-fluoro-2-methyl-1H-indol-1-yl)sulfonyl)-N,N-dimethyl-1H-1,2,4-triazole-1-sulfonamide	348635-87-0	Melon	Cucumis melo	Republic of Korea	Fruit	I	U	7	8.8	7.9	Kabir M.H.; El-Aty A.A.; Rahman M.M.; Chung H.S.; Lee H.S.; Park S.H.; ... Shim J.H. Dissipation pattern and risk quotients assessment of amisulbrom in Korean melon cultivated in plastic house conditions. Environmental Monitoring and Assessment, 2017, 189(6), 302.
30	Amitraz	N'-(2,4-dimethylphenyl)-N-[[(2,4-dimethylphenyl)imino]methyl]-N-methylmethanimidamide	33089-61-1	Gojiberry	Lycium barbarum	China	Fruit	I	F	5	5	5	Fu Y.; Yang T.; Zhao J.; Zhang L.; Chen R.; Wu Y. Determination of eight pesticides in Lycium barbarum by LC-MS/MS and dietary risk assessment. Food Chemistry, 2017, 218, 192-198.
30	Amitraz	N'-(2,4-dimethylphenyl)-N-[[(2,4-dimethylphenyl)imino]methyl]-N-methylmethanimidamide	33089-61-1	Orange	Citrus x sinensis	CA, USA	Peel	I	F	3.6	11	7.3	Iwata, Y., Walker, G.P., O'neal, J.R., Barkley, J.H., 1985. Residues of acephate, amitraz, chlorpyrifos and formetanate hydrochloride on and in fruits after low-volume applications to orange trees. Pesticide Science 16(2), 172-178.
1690	Anabasine	3-(2S)-2-piperidinylpyridine	494-52-0	Mustard greens	Brassica juncea	CA, USA	Leaves	I	F	0.5	5.1	2.8	Gunther F.A.; Blinn R.C.; Benjamini E.; Kinkade W.R.; Anderson; L.D. Insecticide Residues, Magnitudes and Natures of Nicotine Residues on and in Field-Treated Texas Mustard Greens. Journal of Agricultural and Food Chemistry, 1959, 7(5), 330-335.
1175	Anilofos	S-(2-((4-chlorophenyl)(1-methylethyl)amino)-2-oxoethyl) O,O-dimethyl phosphorodithioate	64249-01-0	Rice	Oryza sativa	China	Stalk	I	F	1.34	1.34	1.34	Lu Z.-M.; Lin Y.; Huang Q.-H.; Zou H.-J.; Zeng Q.; Liu X. Residue and dynamic degradation analysis of Anilofos in paddy field system. Journal of Fujian Agriculture and Forestry University, 2007, 36(5), 466-470.
1175	Anilofos	S-(2-((4-chlorophenyl)(1-methylethyl)amino)-2-oxoethyl) O,O-dimethyl phosphorodithioate	64249-01-0	Rice	Oryza sativa	China	Whole plant	I	F	2	3	2.5	Han L.; Liu D.; Fan Z.; Qian C.; Jiang S. Degradation of Anilofos in Paddy Soil and Its Residue in Rice Plant. Journal of China Agricultural University, 2000, 5(1), 112-116.
1175	Anilofos	S-(2-((4-chlorophenyl)(1-methylethyl)amino)-2-oxoethyl) O,O-dimethyl phosphorodithioate	64249-01-0	Rice	Oryza sativa	China	Leaves	I	F	1.41	1.41	1.41	Lu Z.-M.; Lin Y.; Huang Q.-H.; Zou H.-J.; Zeng Q.; Liu X. Residue and dynamic degradation analysis of Anilofos in paddy field system. Journal of Fujian Agriculture and Forestry University, 2007, 36(5), 466-470.
1175	Anilofos	S-(2-((4-chlorophenyl)(1-methylethyl)amino)-2-oxoethyl) O,O-dimethyl phosphorodithioate	64249-01-0	Rice	Oryza sativa	China	Grain	I	F	3.76	3.76	3.76	Li Z. Study on Residues of Anilofos in Rice Plant Grain Soil and Water. Pesticides, 2000, 39(1), 25-26.
1334	Aramite	2-(4-tert-butylphenoxy)-l-methylethyl 2-chloroethyl sulphite	140-57-8	Alfalfa	Medicago sativa	CA, USA	Leaves	O	F	5	5	5	Akesson N.B.; Yates W.E. Problems relating to application of agricultural chemicals and resulting drift residues. Annual Review of Entomology, 9, 285-318
1334	Aramite	2-(4-tert-butylphenoxy)-l-methylethyl 2-chloroethyl sulphite	140-57-8	Cotton	Gossypium hirsutum L.	CA, USA	Leaves	I	F	1	1	1	Gunther F.A.; Reynolds H.T.; Jeppson L.R. Field compatibility of aramite and sulfur in California. Journal of Economic Entomolology, 1953, 46(4), 674-677
1334	Aramite	2-(4-tert-butylphenoxy)-l-methylethyl 2-chloroethyl sulphite	140-57-8	Lima bean	Phaseolus lunatus	CA, USA	Leaves	I	F	1	1	1	Gunther F.A.; Reynolds H.T.; Jeppson L.R. Field compatibility of aramite and sulfur in California. Journal of Economic Entomolology, 1953, 46(4), 674-677
1334	Aramite	2-(4-tert-butylphenoxy)-l-methylethyl 2-chloroethyl sulphite	140-57-8	Orange	Citrus x sinensis	CA, USA	Peel	I	F	7	7	7	Gunther F.; Blinn R.; Kolbezen M.; Barkley J.; Harris W.; Simon H. Microestimation of 2-(p-tert-butylphenoxy) isopropyl-2-chloroethyl sulfite residues. Analytical Chemistry, 1951, 23(12), 1835-1842.
1334	Aramite	2-(4-tert-butylphenoxy)-l-methylethyl 2-chloroethyl sulphite	140-57-8	Orange	Citrus x sinensis	CA, USA	Leaves	I	F	9	9	9	Gunther F.A.; Reynolds H.T.; Jeppson L.R. Field compatibility of aramite and sulfur in California. Journal of Economic Entomolology, 1953, 46(4), 674-677
46	Azadirachtin	dimethyl (2aR,3S,4S,4aR,5S,7aS,8S,10R,10aS,10bR)-10-(acetyloxy)octahydro-3,5-dihydroxy-4-methyl-8-[[(2E)-2-methyl-1-oxo-2-butenyl]oxy]-4-[(1aR,2S,3aS,6aS,7S,7aS)-3a,6a,7,7a-tetrahydro-6a-hydroxy-7a-methyl-2,7-methanofuro[2,3-b]oxireno[e]oxepin-1a(2H)-yl]-1H,7H-naphtho[1,8-bc:4,4a-cŒ]difuran-5,10a(8H)-dicarboxylate	11141-17-6	Balsam fir	Abies balsamea	Canada	Needles	I	F	0.71	0.92	0.82	Sundaram K.M.S.; Curry, J. Initial deposits and persistence of azadirachtin in fir and oak foliage after spray application of 'Margosan-O'® formulation. Pesticide Science, 1994, 41(2), 129-138.
46	Azadirachtin	dimethyl (2aR,3S,4S,4aR,5S,7aS,8S,10R,10aS,10bR)-10-(acetyloxy)octahydro-3,5-dihydroxy-4-methyl-8-[[(2E)-2-methyl-1-oxo-2-butenyl]oxy]-4-[(1aR,2S,3aS,6aS,7S,7aS)-3a,6a,7,7a-tetrahydro-6a-hydroxy-7a-methyl-2,7-methanofuro[2,3-b]oxireno[e]oxepin-1a(2H)-yl]-1H,7H-naphtho[1,8-bc:4,4a-cŒ]difuran-5,10a(8H)-dicarboxylate	11141-17-6	Green ash	Fraxinus pennsylvanica	Canada	Leaves	I	F	7.5	12.3	9.9	Grimalt S.; Thompson D.; Chartrand D.; McFarlane J.; Helson B.; Lyons B.; Meating J.; Scarr T. Foliar residue dynamics of azadirachtins following direct stem injection into white and green ash trees for control of emerald ash borer. Pest Management Science, 2011, 67(10), 1277-1284.
46	Azadirachtin	dimethyl (2aR,3S,4S,4aR,5S,7aS,8S,10R,10aS,10bR)-10-(acetyloxy)octahydro-3,5-dihydroxy-4-methyl-8-[[(2E)-2-methyl-1-oxo-2-butenyl]oxy]-4-[(1aR,2S,3aS,6aS,7S,7aS)-3a,6a,7,7a-tetrahydro-6a-hydroxy-7a-methyl-2,7-methanofuro[2,3-b]oxireno[e]oxepin-1a(2H)-yl]-1H,7H-naphtho[1,8-bc:4,4a-cŒ]difuran-5,10a(8H)-dicarboxylate	11141-17-6	Olive	Olea europaea cv. Tonda di Cagliari	Italy	Fruit	O	F	0.8	0.8	0.8	Caboni P.; Cabras M.; Angioni A.; Russo M.; Cabras P. Persistence of Azadirachtin Residues on Olives after Field Treatment. Journal of Agricultural and Food Chemistry, 2002, 50(12), 3491-3494.
46	Azadirachtin	dimethyl (2aR,3S,4S,4aR,5S,7aS,8S,10R,10aS,10bR)-10-(acetyloxy)octahydro-3,5-dihydroxy-4-methyl-8-[[(2E)-2-methyl-1-oxo-2-butenyl]oxy]-4-[(1aR,2S,3aS,6aS,7S,7aS)-3a,6a,7,7a-tetrahydro-6a-hydroxy-7a-methyl-2,7-methanofuro[2,3-b]oxireno[e]oxepin-1a(2H)-yl]-1H,7H-naphtho[1,8-bc:4,4a-cŒ]difuran-5,10a(8H)-dicarboxylate	11141-17-6	Peach	Prunus persica cv. Spring belle	Italy	Leaves	O	F	1.05	3.83	2.44	Sarais G.; Angioni A.; Lai F.; Cabras P.; Caboni P. Persistence of Two Neem Formulations on Peach Leaves and Fruit: Effect of the Distribution. Journal of Agricultural and Food Chemistry, 2009, 57(6), 2457-2461.
46	Azadirachtin	dimethyl (2aR,3S,4S,4aR,5S,7aS,8S,10R,10aS,10bR)-10-(acetyloxy)octahydro-3,5-dihydroxy-4-methyl-8-[[(2E)-2-methyl-1-oxo-2-butenyl]oxy]-4-[(1aR,2S,3aS,6aS,7S,7aS)-3a,6a,7,7a-tetrahydro-6a-hydroxy-7a-methyl-2,7-methanofuro[2,3-b]oxireno[e]oxepin-1a(2H)-yl]-1H,7H-naphtho[1,8-bc:4,4a-cŒ]difuran-5,10a(8H)-dicarboxylate	11141-17-6	Peach	Prunus persica cv. Spring belle	Italy	Skin	O	F	1.11	3.2	2.16	Sarais G.; Angioni A.; Lai F.; Cabras P.; Caboni P. Persistence of Two Neem Formulations on Peach Leaves and Fruit: Effect of the Distribution. Journal of Agricultural and Food Chemistry, 2009, 57(6), 2457-2461.
46	Azadirachtin	dimethyl (2aR,3S,4S,4aR,5S,7aS,8S,10R,10aS,10bR)-10-(acetyloxy)octahydro-3,5-dihydroxy-4-methyl-8-[[(2E)-2-methyl-1-oxo-2-butenyl]oxy]-4-[(1aR,2S,3aS,6aS,7S,7aS)-3a,6a,7,7a-tetrahydro-6a-hydroxy-7a-methyl-2,7-methanofuro[2,3-b]oxireno[e]oxepin-1a(2H)-yl]-1H,7H-naphtho[1,8-bc:4,4a-cŒ]difuran-5,10a(8H)-dicarboxylate	11141-17-6	Peach	Prunus persica cv. Spring belle	Italy	Fruit	O	F	2	4.57	3.29	Sarais G.; Angioni A.; Lai F.; Cabras P.; Caboni P. Persistence of Two Neem Formulations on Peach Leaves and Fruit: Effect of the Distribution. Journal of Agricultural and Food Chemistry, 2009, 57(6), 2457-2461.
46	Azadirachtin	dimethyl (2aR,3S,4S,4aR,5S,7aS,8S,10R,10aS,10bR)-10-(acetyloxy)octahydro-3,5-dihydroxy-4-methyl-8-[[(2E)-2-methyl-1-oxo-2-butenyl]oxy]-4-[(1aR,2S,3aS,6aS,7S,7aS)-3a,6a,7,7a-tetrahydro-6a-hydroxy-7a-methyl-2,7-methanofuro[2,3-b]oxireno[e]oxepin-1a(2H)-yl]-1H,7H-naphtho[1,8-bc:4,4a-cŒ]difuran-5,10a(8H)-dicarboxylate	11141-17-6	Peach	Prunus persica cv. Spring belle	Italy	Wax	O	F	4.52	21.18	12.85	Sarais G.; Angioni A.; Lai F.; Cabras P.; Caboni P. Persistence of Two Neem Formulations on Peach Leaves and Fruit: Effect of the Distribution. Journal of Agricultural and Food Chemistry, 2009, 57(6), 2457-2461.
46	Azadirachtin	dimethyl (2aR,3S,4S,4aR,5S,7aS,8S,10R,10aS,10bR)-10-(acetyloxy)octahydro-3,5-dihydroxy-4-methyl-8-[[(2E)-2-methyl-1-oxo-2-butenyl]oxy]-4-[(1aR,2S,3aS,6aS,7S,7aS)-3a,6a,7,7a-tetrahydro-6a-hydroxy-7a-methyl-2,7-methanofuro[2,3-b]oxireno[e]oxepin-1a(2H)-yl]-1H,7H-naphtho[1,8-bc:4,4a-cŒ]difuran-5,10a(8H)-dicarboxylate	11141-17-6	Red maple	Acer rubrum	Canada	Leaves	I	F	5.62	7.02	6.32	Sundaram K.M.S. Azadirachtin biopesticide: A review of studies conducted on its analytical chemistry, environmental behaviour and biological effects. Journal of Environmental Science and Health, 1996, 31(4): 913-948.									#REF!
46	Azadirachtin	dimethyl (2aR,3S,4S,4aR,5S,7aS,8S,10R,10aS,10bR)-10-(acetyloxy)octahydro-3,5-dihydroxy-4-methyl-8-[[(2E)-2-methyl-1-oxo-2-butenyl]oxy]-4-[(1aR,2S,3aS,6aS,7S,7aS)-3a,6a,7,7a-tetrahydro-6a-hydroxy-7a-methyl-2,7-methanofuro[2,3-b]oxireno[e]oxepin-1a(2H)-yl]-1H,7H-naphtho[1,8-bc:4,4a-cŒ]difuran-5,10a(8H)-dicarboxylate	11141-17-6	Red oak	Quercus rubra	Canada	Leaves	I	F	0.79	0.83	0.81	Sundaram K.M.S. Azadirachtin biopesticide: A review of studies conducted on its analytical chemistry, environmental behaviour and biological effects. Journal of Environmental Science and Health, 1996, 31(4): 913-948.
46	Azadirachtin	dimethyl (2aR,3S,4S,4aR,5S,7aS,8S,10R,10aS,10bR)-10-(acetyloxy)octahydro-3,5-dihydroxy-4-methyl-8-[[(2E)-2-methyl-1-oxo-2-butenyl]oxy]-4-[(1aR,2S,3aS,6aS,7S,7aS)-3a,6a,7,7a-tetrahydro-6a-hydroxy-7a-methyl-2,7-methanofuro[2,3-b]oxireno[e]oxepin-1a(2H)-yl]-1H,7H-naphtho[1,8-bc:4,4a-cŒ]difuran-5,10a(8H)-dicarboxylate	11141-17-6	Strawberry	Fragaria x ananassa duch cv. Tudla	Italy	Fruit	O	F	0.73	2.05	1.39	Caboni P.; Sarais G.; Angioni A.; Garcia A.J.; Lai F.; Dedola F.; Cabras P. Residues and Persistence of Neem Formulations on Strawberry after Field Treatment. Journal of Agricultural and Food Chemistry, 2006, 54(26), 10026-10032.
46	Azadirachtin	dimethyl (2aR,3S,4S,4aR,5S,7aS,8S,10R,10aS,10bR)-10-(acetyloxy)octahydro-3,5-dihydroxy-4-methyl-8-[[(2E)-2-methyl-1-oxo-2-butenyl]oxy]-4-[(1aR,2S,3aS,6aS,7S,7aS)-3a,6a,7,7a-tetrahydro-6a-hydroxy-7a-methyl-2,7-methanofuro[2,3-b]oxireno[e]oxepin-1a(2H)-yl]-1H,7H-naphtho[1,8-bc:4,4a-cŒ]difuran-5,10a(8H)-dicarboxylate	11141-17-6	Spruce	Picea spp.	Canada	Leaves	I	F	0.81	1.62	1.22	Sundaram K.M.S. Effect of additives in the neem formulations on deposition, volatilization and persistence of azadirachtin in spruce foliage. Journal of Environmental Science & Health Part B, 1997, 32(4), 523-544.
46	Azadirachtin	dimethyl (2aR,3S,4S,4aR,5S,7aS,8S,10R,10aS,10bR)-10-(acetyloxy)octahydro-3,5-dihydroxy-4-methyl-8-[[(2E)-2-methyl-1-oxo-2-butenyl]oxy]-4-[(1aR,2S,3aS,6aS,7S,7aS)-3a,6a,7,7a-tetrahydro-6a-hydroxy-7a-methyl-2,7-methanofuro[2,3-b]oxireno[e]oxepin-1a(2H)-yl]-1H,7H-naphtho[1,8-bc:4,4a-cŒ]difuran-5,10a(8H)-dicarboxylate	11141-17-6	White ash	Fraxinus americana	Canada	Leaves	I	F	5.1	5.1	5.1	Grimalt S.; Thompson D.; Chartrand D.; McFarlane J.; Helson B.; Lyons B.; Meating J.; Scarr T. Foliar residue dynamics of azadirachtins following direct stem injection into white and green ash trees for control of emerald ash borer. Pest Management Science, 2011, 67(10), 1277-1284.
46	Azadirachtin	dimethyl (2aR,3S,4S,4aR,5S,7aS,8S,10R,10aS,10bR)-10-(acetyloxy)octahydro-3,5-dihydroxy-4-methyl-8-[[(2E)-2-methyl-1-oxo-2-butenyl]oxy]-4-[(1aR,2S,3aS,6aS,7S,7aS)-3a,6a,7,7a-tetrahydro-6a-hydroxy-7a-methyl-2,7-methanofuro[2,3-b]oxireno[e]oxepin-1a(2H)-yl]-1H,7H-naphtho[1,8-bc:4,4a-cŒ]difuran-5,10a(8H)-dicarboxylate	11141-17-6	White spruce	Picea glauca	Canada	Leaves	I	F	0.81	1.62	1.22	Grimalt S.; Thompson D.; Chartrand D.; McFarlane J.; Helson B.; Lyons B.; Meating J.; Scarr T. Foliar residue dynamics of azadirachtins following direct stem injection into white and green ash trees for control of emerald ash borer. Pest Management Science, 2011, 67(10), 1277-1284.
49	Azimsulfuron	N-(((4,6-dimethoxy-2-pyrimidinyl)amino)carbonyl)-1-methyl-4-(2-methyl-2H-tetrazol-5-yl)-1H-pyrazole-5-sulfonamide	120162-55-2	Rice	Oryza sativa	China	Whole plant	I	F	2.4	4.2	3.3	Chen L.; Dai R.-C.;Chen J.-M.; Xia F.-l. Azimsulfuron WDG residue dynamics in a rice paddy environment. Pesticides, 2006, 45(3), 186-188. Calculated.
50	Azinphos ethyl	O,O-diethyl S-((4-oxo-1,2,3-benzotriazin-3(4H)-yl)methyl) phosphorodithioate	2642-71-9	Apple	Malus pumila Mill.	Greece	Fruit (in store, ambient conditions)	I	F	83	83	83	Pappas C.J.; Athanasopoulos P.E.; Kyriakidis N.B. Degradation of azinphos-ethyl in apples stored in different conditions. Journal of Agricultural and Food Chemistry, 1998, 46(6), 2092-2095
50	Azinphos ethyl	O,O-diethyl S-((4-oxo-1,2,3-benzotriazin-3(4H)-yl)methyl) phosphorodithioate	2642-71-9	Apple	Malus pumila Mill.	Greece	Fruit (in store, climate controlled conditions)	I	F	91	91	91	Pappas C.J.; Athanasopoulos P.E.; Kyriakidis N.B. Degradation of azinphos-ethyl in apples stored in different conditions. Journal of Agricultural and Food Chemistry, 1998, 46(6), 2092-2095
50	Azinphos ethyl	O,O-diethyl S-((4-oxo-1,2,3-benzotriazin-3(4H)-yl)methyl) phosphorodithioate	2642-71-9	Apple	Malus pumila Mill.	Greece	Fruit	I	F	10	10	10	Pappas C.J.; Athanasopoulos P.E.; Kyriakidis N.B. Degradation of azinphos-ethyl in apples stored in different conditions. Journal of Agricultural and Food Chemistry, 1998, 46(6), 2092-2095
51	Azinphos methyl	O,O-dimethyl S-[(4-oxo-1,2,3-benzotriazin-3(4H)-yl)methyl] phosphorodithioate	86-50-0	Alfalfa	Medicago sativa	USA	Stem	O	F	1.65	5.1	3.38	Schauber E.M.; Edge W.D.; Wolff J.O. Influence of vegetation height on the distribution and persistence of insecticide residues on alfalfa and soil. Archives of Environmental Contamination and Toxicology, 1995, 29(4), 449-454.
51	Azinphos methyl	O,O-dimethyl S-[(4-oxo-1,2,3-benzotriazin-3(4H)-yl)methyl] phosphorodithioate	86-50-0	Alfalfa	Medicago sativa	USA	Leaves	O	F	2.5	4.5	3.5	Bennett R.S.; Edge W.D.; Griffis W.L.; Matz A.C.; Wolff J.O.; Ganio L.M. Temporal and spatial distribution of azinphos-methyl applied to alfalfa. Archives of Environmental Contamination and Toxicology, 1994, 27(4), 534-540.
51	Azinphos methyl	O,O-dimethyl S-[(4-oxo-1,2,3-benzotriazin-3(4H)-yl)methyl] phosphorodithioate	86-50-0	Apple	Malus pumila Mill.	Canada	Leaves	I	F	2.8	17	9.9	Willis G.H.; McDowell L.L. Pesticide persistence on foliage. Reviews of Environmental Contamination and Toxicology, 1987, 100, 23-73.
51	Azinphos methyl	O,O-dimethyl S-[(4-oxo-1,2,3-benzotriazin-3(4H)-yl)methyl] phosphorodithioate	86-50-0	Apple	Malus pumila Mill.	Greece	Fruit	O	F	10	10	10	Athanasopoulos P.E.; Pappas C. Effects of fruit acidity and storage conditions on the rate of degradation of azinphos methyl on apples and lemons. Food Chemistry, 2000, 69(1), 69-72.
51	Azinphos methyl	O,O-dimethyl S-[(4-oxo-1,2,3-benzotriazin-3(4H)-yl)methyl] phosphorodithioate	86-50-0	Apple	Malus pumila Mill.	Greece	Fruit	O	X (cold storage)	122	122	122	Athanasopoulos P.E.; Pappas C. Effects of fruit acidity and storage conditions on the rate of degradation of azinphos methyl on apples and lemons. Food Chemistry, 2000, 69(1), 69-72.
51	Azinphos methyl	O,O-dimethyl S-[(4-oxo-1,2,3-benzotriazin-3(4H)-yl)methyl] phosphorodithioate	86-50-0	Cotton	Gossypium hirsutum L.	*	Leaves	O	F	1.3	2	1.65	Willis G.H.; McDowell L.L. Pesticide persistence on foliage. Reviews of Environmental Contamination and Toxicology, 1987, 100, 23-73.
51	Azinphos methyl	O,O-dimethyl S-[(4-oxo-1,2,3-benzotriazin-3(4H)-yl)methyl] phosphorodithioate	86-50-0	Grape	Vitis vinifera L.	CA, USA	Leaves	I	F	16	16	16	Willis G.H.; McDowell L.L. Pesticide persistence on foliage. Reviews of Environmental Contamination and Toxicology, 1987, 100, 23-73.
51	Azinphos methyl	O,O-dimethyl S-[(4-oxo-1,2,3-benzotriazin-3(4H)-yl)methyl] phosphorodithioate	86-50-0	Lemon	Citrus x limon		Fruit	O	F	5	5	5	Athanasopoulos P.E.; Pappas C. Effects of fruit acidity and storage conditions on the rate of degradation of azinphos methyl on apples and lemons. Food Chemistry, 2000, 69(1), 69-72.
51	Azinphos methyl	O,O-dimethyl S-[(4-oxo-1,2,3-benzotriazin-3(4H)-yl)methyl] phosphorodithioate	86-50-0	Lemon	Citrus x limon		Fruit	O	X (cold storage)	46	46	46	Athanasopoulos P.E.; Pappas C. Effects of fruit acidity and storage conditions on the rate of degradation of azinphos methyl on apples and lemons. Food Chemistry, 2000, 69(1), 69-72.
51	Azinphos methyl	O,O-dimethyl S-[(4-oxo-1,2,3-benzotriazin-3(4H)-yl)methyl] phosphorodithioate	86-50-0	Nectarine	Prunus persica var. Nucipersica (Del Rio Rey)	California USA	Leaves	O	F	30	30	30	Schneider F.; Spencer J.; Sanborn J.; Alcoser D.; Garza R.; Margetich S.; del Valle M. Dermal and urinary monitoring of nectarine harvesters exposed to azinphos-methyl residues in Fresno County California 1988, California Department of Food and Agriculture. 1990.
51	Azinphos methyl	O,O-dimethyl S-[(4-oxo-1,2,3-benzotriazin-3(4H)-yl)methyl] phosphorodithioate	86-50-0	Olive	Olea europaea cv. Yacouti	Italy	Fruit	I	F	9.3	9.3	9.3	Cabras P.; Angioni A.; Garau V.L.; Melis M.; Pirisi F.M.; Karim M.; Minelli E.V. Persistence of insecticide residues in olives and olive oil. Journal of Agricultural and Food Chemistry, 1997, 45(6), 2244-2247.
51	Azinphos methyl	O,O-dimethyl S-[(4-oxo-1,2,3-benzotriazin-3(4H)-yl)methyl] phosphorodithioate	86-50-0	Orange	Citrus x sinensis	Florida, USA	Leaves	O	F	3.98	4.88	4.43	Thompson N.P.; Brooks R.F. Disappearance of dislodgable residues of five organophosphate pesticides on citrus leaves and fruit during dry and wet weather in Florida. Archives of Environmental Contamination and Toxicology, 1977, 5(1), 55-61. Calcuated.
51	Azinphos methyl	O,O-dimethyl S-[(4-oxo-1,2,3-benzotriazin-3(4H)-yl)methyl] phosphorodithioate	86-50-0	Peach	Prunus persica	Brazil	Fruit	I	F	12	12	12	Minelli E.V.; Angioni A.; Cabras P.; Garau V.L.; Melis M.; Pirisi F.M.; Cabitza F.; Cubeddu M. Persistence of some pesticides in peach fruit. Italian Journal of Food Science, 1996, 8(1), 57-62.
51	Azinphos methyl	O,O-dimethyl S-[(4-oxo-1,2,3-benzotriazin-3(4H)-yl)methyl] phosphorodithioate	86-50-0	Pear	Pyrus communis	California, USA	Leaves	O	F	3	24	13.5	Schneider F.; Benson C Dislodgeable Azinphosmethyl Residues on Treated Pear Foliage, State of California, Environmental Protection Agency, 1996
51	Azinphos methyl	O,O-dimethyl S-[(4-oxo-1,2,3-benzotriazin-3(4H)-yl)methyl] phosphorodithioate	86-50-0	Pear	Pyrus communis	Uruguay	Fruit	I	X (under rainshield)	2.17	2.17	2.17	Galietta G.; Egaña E.; Gemelli F.; Maeso D.; Casco N.; Conde P.; Nueñz S. Pesticide dissipation curves In peach, pear and tomato crops in Uruguay. Journal of Environmental Science and Health, 2011, 46(1), 35-40. Calcuated.
51	Azinphos methyl	O,O-dimethyl S-[(4-oxo-1,2,3-benzotriazin-3(4H)-yl)methyl] phosphorodithioate	86-50-0	Pear	Pyrus communis	California, USA	Leaves	O	F	2.8	26.6	14.7	Rech C.; Bisbiglia M.; Margetich S. Degradation of Azinphosmethyl Residue on Pear Foliage. Worker Health and Safety Series HS-1402. California Deptartment of Food and Agriculture, Sacramento, CA, 1986, p. 24.
51	Azinphos methyl	O,O-dimethyl S-[(4-oxo-1,2,3-benzotriazin-3(4H)-yl)methyl] phosphorodithioate	86-50-0	Sorghum	Sorghum bicolor	TX, USA	Leaves	I	F	4	4	4	Willis G.H.; McDowell L.L. Pesticide persistence on foliage. Reviews of Environmental Contamination and Toxicology, 1987, 100, 23-73.
51	Azinphos-methyl	O,O-dimethyl S-[(4-oxo-1,2,3-benzotriazin-3(4H)-yl)methyl] phosphorodithioate	86-50-0	Sugarcane	Saccharum officinarum	LA, USA	Leaves	O	F	0.9	1.09	1	Southwick L.M.; Willis G.H.; Reagan T. E.; Rodriguez L.M. Residues in runoff and on leaves of azinphosmethyl and esfenvalerate applied to sugarcane. Environmental Entomology, 1995, 24(5), 1013-1017
54	Azoxystrobin	methyl (alphaE)-2-[[6-(2-cyanophenoxy)-4-pyrimidinyl]oxy]-alpha-(methoxymethylene)benzeneacetate	131860-33-8	Banana	Musa spp.	China	Flesh	I	F	7.5	13.5	10.5	Wang S.; Sun H.; Liu Y. Dissipation and residue of azoxystrobin in banana under field condition. Environmental Monitoring and Assessment, 2013, 185(9), 7757-7761.
54	Azoxystrobin	methyl (alphaE)-2-[[6-(2-cyanophenoxy)-4-pyrimidinyl]oxy]-alpha-(methoxymethylene)benzeneacetate	131860-33-8	Banana	Musa spp.	China	Whole fruit	I	F	7.6	11.6	9.6	Huan Z.; Xu Z.; Lv D.; Xie D.; Luo J. Dissipation and residues of difenoconazole and azoxystrobin in bananas and soil in two agro-climatic zones of China. Bulletin of Environmental Contamination and Toxicology, 2013, 91(6), 734-738.
54	Azoxystrobin	methyl (alphaE)-2-[[6-(2-cyanophenoxy)-4-pyrimidinyl]oxy]-alpha-(methoxymethylene)benzeneacetate	131860-33-8	Cabbage	Brassica oleracea capitata	China	Leaves	I	F	0.4	0.4	0.4	Hou F.; Zhao L.; Liu, F. Residues and dissipation of chlorothalonil and azoxystrobin in cabbage under field conditions. International Journal of Environmental Analytical Chemistry, 2016, 96(12), 1105-1116.
54	Azoxystrobin	methyl (alphaE)-2-[[6-(2-cyanophenoxy)-4-pyrimidinyl]oxy]-alpha-(methoxymethylene)benzeneacetate	131860-33-8	Gojiberry	Lycium barbarum	China	Fruit	I	F	3.4	3.4	3.4	Fu Y.; Yang T.; Zhao J.; Zhang L.; Chen R.; Wu Y. Determination of eight pesticides in Lycium barbarum by LC-MS/MS and dietary risk assessment. Food Chemistry, 2017, 218, 192-198.
54	Azoxystrobin	methyl (alphaE)-2-[[6-(2-cyanophenoxy)-4-pyrimidinyl]oxy]-alpha-(methoxymethylene)benzeneacetate	131860-33-8	Grape	Vitis vinifera	India	Fruit	I	F	7	9.1	8.05	Gajbhiye V.T.; Gupta S.; Mukherjee I.; Singh S.B.; Singh N.; Dureja P.; Kumar Y. Persistence of Azoxystrobin in/on Grapes and Soil in Different Grapes Growing Areas of India. Bulletin of Environmental Contamination and Toxicology, 2011, 86(1), 90-9
54	Azoxystrobin	methyl (alphaE)-2-[[6-(2-cyanophenoxy)-4-pyrimidinyl]oxy]-alpha-(methoxymethylene)benzeneacetate	131860-33-8	Grape	Vitis vinifera cv. Chardonnay	Italy	Fruit	O	F	15.2	15.2	15.2	Cabras P.; Angioni A.; Garau V.L.; Pirisi F.M.; Espinoza J.; Mendoza A.; Cabitza F.; Pala M.; Brandolini V. Fate of Azoxystrobin, Fluazinam, Kresoxim-methyl, Mepanipyrim, and Tetraconazole from Vine to Wine. Journal of Agricultural and Food Chemistry, 1998, 46, 3249-3251.
54	Azoxystrobin	methyl (alphaE)-2-[[6-(2-cyanophenoxy)-4-pyrimidinyl]oxy]-alpha-(methoxymethylene)benzeneacetate	131860-33-8	Grape	Vitis vinifera	Republic of Korea	Fruit	I	X (under rainshield)	13.28	13.28	13.28	Lee C.R.; Hong J.H.; Lim J.S.; Lee K.S. Residue Patterns of Azoxystrobin and Cyenopyrafen In Grape between Rainshield and Plastic House Conditions. The Korean Journal of Pesticide Science, 2011, 15(2), 97-103
54	Azoxystrobin	methyl (alphaE)-2-[[6-(2-cyanophenoxy)-4-pyrimidinyl]oxy]-alpha-(methoxymethylene)benzeneacetate	131860-33-8	Grape	Vitis vinifera	Republic of Korea	Fruit	I	U	15.58	15.58	15.58	Lee C.R.; Hong J.H.; Lim J.S.; Lee K.S. Residue Patterns of Azoxystrobin and Cyenopyrafen In Grape between Rainshield and Plastic House Conditions. The Korean Journal of Pesticide Science, 2011, 15(2), 97-103
54	Azoxystrobin	methyl (alphaE)-2-[[6-(2-cyanophenoxy)-4-pyrimidinyl]oxy]-alpha-(methoxymethylene)benzeneacetate	131860-33-8	Ginseng	Panax ginseng	China	Whole plant	I	F	1.6	1.6	1.6	Hou Z.; Wang X.; Zhao X.; Wang X.; Yuan X.; Lu, Z. Dissipation rates and residues of fungicide azoxystrobin in ginseng and soil at two different cultivated regions in China. Environmental Monitoring and Assessment, 2016, 188(7), 1-7
54	Azoxystrobin	methyl (alphaE)-2-[[6-(2-cyanophenoxy)-4-pyrimidinyl]oxy]-alpha-(methoxymethylene)benzeneacetate	131860-33-8	Lettuce	Lactuca sativa L. var. Lorciva	Spain	Leaves	I	U	4.87	6.23	5.55	Fenoll J.; Hellín P.; Camacho M.D.M.; López J.; González A.; Lacasa A.; Flores P. Dissipation rates of procymidone and azoxystrobin in greenhouse grown lettuce and under cold storage conditions. Journal of Environmental and Analytical Chemistry, 2008, 88(10), 737-746.
54	Azoxystrobin	methyl (alphaE)-2-[[6-(2-cyanophenoxy)-4-pyrimidinyl]oxy]-alpha-(methoxymethylene)benzeneacetate	131860-33-8	Mango	Mangifera indica	*	Fruit	I	F	1.2	1.25	1.23	Sundravadana S.; Alice D.; Samiyappan R.; Kuttalam S. Determination of azoxystrobin residue by UV detection high performance liquid chromatography in mango. Journal of the Brazilian Chemical Society, 2008, 19(1), 60-63.
54	Azoxystrobin	methyl (alphaE)-2-[[6-(2-cyanophenoxy)-4-pyrimidinyl]oxy]-alpha-(methoxymethylene)benzeneacetate	131860-33-8	Orange	Citrus x sinensis	China	Fruit	I	F	14	14.1	14.05	Han B.; An-qing Y.; Wu H.-M.; Wang M.-C.; Qin L. Degradation of Azoxystrobin Residue in Orange and Soil. Agrochemicals, 2009, 48(12), 899-901.
54	Azoxystrobin	methyl (alphaE)-2-[[6-(2-cyanophenoxy)-4-pyrimidinyl]oxy]-alpha-(methoxymethylene)benzeneacetate	131860-33-8	Passion fruit (yellow)	Passiflora edulis f. flavicarpa Degener	Columbia	Pulp	I	F	8	8	8	Juraske R., Fantke P., Romero Ramírez A.C., González A. Pesticide residue dynamics in passion fruits: Comparing field trial and modeling results. Chemosphere, 2012, 89, 850-855.
54	Azoxystrobin	methyl (alphaE)-2-[[6-(2-cyanophenoxy)-4-pyrimidinyl]oxy]-alpha-(methoxymethylene)benzeneacetate	131860-33-8	Passion fruit (yellow)	Passiflora edulis f. flavicarpa Degener	Columbia	Fruit	I	F	13.8	13.8	13.8	Juraske R.; Fantke P.; Romero Ramírez A.C.; González A.. Pesticide residue dynamics in passion fruits: Comparing field trial and modeling results. Chemosphere, 2012, 89, 850-855.
54	Azoxystrobin	methyl (alphaE)-2-[[6-(2-cyanophenoxy)-4-pyrimidinyl]oxy]-alpha-(methoxymethylene)benzeneacetate	131860-33-8	Peach	Prunus persica	Uruguay	Fruit	I	X (under rainshield)	0.72	0.72	0.72	Galietta G.; Egaña E.; Gemelli F.; Maeso D.; Casco N.; Conde P.; Nueñz S. Pesticide dissipation curves in peach, pear and tomato crops in Uruguay. Journal of Environmental Science and Health, 20122, 46(1), 35-40. Calcuated.
54	Azoxystrobin	methyl (alphaE)-2-[[6-(2-cyanophenoxy)-4-pyrimidinyl]oxy]-alpha-(methoxymethylene)benzeneacetate	131860-33-8	Pepper	Capsicum annuum L. cv. Almuden	Spain	Fruit	I	U	13.54	15.21	14.4	Fenoll J.; Ruiz E.; Hellín P.; Lacasa A.; Flores P. Strobilurin residue levels in greenhouse‐grown pepper and under cold‐storage conditions. Journal of the Science of Food and Agriculture, 2009, 89(2), 299-303.
54	Azoxystrobin	methyl (alphaE)-2-[[6-(2-cyanophenoxy)-4-pyrimidinyl]oxy]-alpha-(methoxymethylene)benzeneacetate	131860-33-8	Pepper (chilli)	Capsicum annuum Linn.	India	Fruit	I	F	1.7	2.17	1.94	Srinivasan V.M.; Krishnamoorthy A.S. Dissipation and Harvest Time Residue Analysis of Azoxystrobin in Chilli. Advances in Life Sciences, 2016, 5(14), 5549-5556.
54	Azoxystrobin	methyl (alphaE)-2-[[6-(2-cyanophenoxy)-4-pyrimidinyl]oxy]-alpha-(methoxymethylene)benzeneacetate	131860-33-8	Pomegranate	Punica granatum L. cv. Bhagwa	India	Fruit	I	F	2	4.75	3.46	Utture S.C.; Banerjee K.; Dasgupta S.; Patil S.H.; Jadhav M.R.; Wagh S.S.; ... & Adsule P.G. Dissipation and distribution behavior of azoxystrobin, carbendazim, and difenoconazole in pomegranate fruits. Journal of Agricultural and Food Chemistry, 2011, 59(14), 7866-7873.
54	Azoxystrobin	methyl (alphaE)-2-[[6-(2-cyanophenoxy)-4-pyrimidinyl]oxy]-alpha-(methoxymethylene)benzeneacetate	131860-33-8	Soybean	Glycine max	*	Whole plant	I	F	0.8	3.7	2.25	Yin L.-D.; Hou Z.-G.; Chen C.; Ji H.-M.; Wei X.-H.; Lu Z.-B.; Wang Y. Residues and decline study of azoxystrobin in soybean. Chinese Journal of Pesticide Science, 2011, 13(3), 304-309.
54	Azoxystrobin	methyl (alphaE)-2-[[6-(2-cyanophenoxy)-4-pyrimidinyl]oxy]-alpha-(methoxymethylene)benzeneacetate	131860-33-8	Strawberry	Fragaria x ananassa Duch cv. Tudla	Italy	Fruit	I	F	7.8	7.8	7.8	Angioni A.; Schirra M.; Garau V.L.; Melis M.; Tuberoso C.I.G.; Cabras P. Residues of azoxystrobin, fenhexamid and pyrimethanil in strawberry following field treatments and the effect of domestic washing. Food Additives and Contaminants, 2004, 21(11), 1065-1070.
54	Azoxystrobin	methyl (alphaE)-2-[[6-(2-cyanophenoxy)-4-pyrimidinyl]oxy]-alpha-(methoxymethylene)benzeneacetate	131860-33-8	Tomato	Lycopersicon esculentum Mill.	India	Fruit	O	U	0.8	2.39	1.6	Anand T.; Chandrasekaran A.; Kuttalam S.; Samiyappan R. Evaluation of azoxystrobin (Amistar 25 SC) against early leaf blight and leaf spot diseases of tomato. Journal of Agricultural Technology, 2010, 6(3), 469-485.
54	Azoxystrobin	methyl (alphaE)-2-[[6-(2-cyanophenoxy)-4-pyrimidinyl]oxy]-alpha-(methoxymethylene)benzeneacetate	131860-33-8	Tomato	Lycopersicon esculentum cv. Shiren & Caramba	Italy	Fruit	I	U	9.9	14.65	12.28	Cabizza M.; Dedola F.; Satta M. Residues behavior of some fungicides applied on two greenhouse tomato varieties different in shape and weight. Journal of Environmental Science and Health, 2012, 47(5), 379-384. Calculated.
54	Azoxystrobin	methyl (alphaE)-2-[[6-(2-cyanophenoxy)-4-pyrimidinyl]oxy]-alpha-(methoxymethylene)benzeneacetate	131860-33-8	Tomato	Lycopersicon esculentum Mill. var Marissa	Poland	Fruit	I	U	3.41	3.41	3.41	Jankowska M.; Kaczynski P.; Hrynko I.; Lozowicka B. Dissipation of six fungicides in greenhouse-grown tomatoes with processing and health risk. Environmental Science and Pollution Research, 2016, 23(12), 11885-11900
54	Azoxystrobin	methyl (alphaE)-2-[[6-(2-cyanophenoxy)-4-pyrimidinyl]oxy]-alpha-(methoxymethylene)benzeneacetate	131860-33-8	Tomato	Lycopersicon esculentum Mill. var Harzfeuer	Poland	Fruit	I	U	3.55	3.55	3.55	Jankowska M.; Kaczynski P.; Hrynko I.; Lozowicka B. Dissipation of six fungicides in greenhouse-grown tomatoes with processing and health risk. Environmental Science and Pollution Research, 2016, 23(12), 11885-11900
59	Benalaxyl	methyl N-(2,6-dimethylphenyl)-N-(phenylacetyl)-DL-alaninate	71626-11-4	Cucumber	Cucumis sativus L.	China	Fruit	I	U	1.8	2.7	2.25	Wang X.; Jia G.; Qiu J.; Diao J.; Zhu W.; Lv C.; Zhou Z. Stereoselective degradation of fungicide benalaxyl in soils and cucumber plants. Chirality, 2007, 19(4), 300-306.
59	Benalaxyl	methyl N-(2,6-dimethylphenyl)-N-(phenylacetyl)-DL-alaninate	71626-11-4	Pepper	Capsicum spp.	China	Fruit	I	U	0.45	0.63	0.54	Gu X.; Wang P.; Liu D.; Lv C.; Lu Y.; Zhou Z. Stereoselective degradation of benalaxyl in tomato, tobacco, sugar beet, capsicum, and soil. Chirality, 2008, 20(2), 125-129.
59	Benalaxyl	methyl N-(2,6-dimethylphenyl)-N-(phenylacetyl)-DL-alaninate	71626-11-4	Sugarbeet	Beta vulgaris subsp. vulgaris convar. vulgaris var. altissima	China	Leaves	I	U	2.31	2.52	2.42	Gu X.; Wang P.; Liu D.; Lv C.; Lu Y.; Zhou Z. Stereoselective degradation of benalaxyl in tomato, tobacco, sugar beet, capsicum, and soil. Chirality, 2008, 20(2), 125-129.
59	Benalaxyl	methyl N-(2,6-dimethylphenyl)-N-(phenylacetyl)-DL-alaninate	71626-11-4	Tobacco	Nicotiana tabacum	China	Leaves	I	U	3.44	4.6	4.02	Gu X.; Wang P.; Liu D.; Lv C.; Lu Y.; Zhou Z. Stereoselective degradation of benalaxyl in tomato, tobacco, sugar beet, capsicum, and soil. Chirality, 2008, 20(2), 125-129.
59	Benalaxyl	methyl N-(2,6-dimethylphenyl)-N-(phenylacetyl)-DL-alaninate	71626-11-4	Tomato	Lycopersicon esculentum Mill.	China	Fruit	I	U	0.85	2.59	1.72	Gu X.; Wang P.; Liu D.; Lv C.; Lu Y.; Zhou Z. Stereoselective degradation of benalaxyl in tomato, tobacco, sugar beet, capsicum, and soil. Chirality, 2008, 20(2), 125-129.
59	Benalaxyl	methyl N-(2,6-dimethylphenyl)-N-(phenylacetyl)-DL-alaninate	71626-11-4	Tomato	Lycopersicon esculentum Mill. hybrid RS 862699	Italy	Fruit	I	F	8.3	8.3	8.3	Gambacorta G.; Faccia M.; Lamacchia C.; Luccia A.D.; Notte E.L. Pesticide residues in tomato grown in open field. Food Control, 2005, 16(7), 629-632.
1086	Benazolin ethyl	ethyl 4-chloro-2-oxo-3(2H)-benzothiazoleacetate	25059-80-7	Oilseed rape	Brassica napus	*	Straw	I	F	3.7	5.1	4.4	Guan,W.; Zhang H. Determination and study on residue and dissipation of benazolin-ethyl and quizalofop-p-ethyl in rape and soil. International Journal of Environmental Analytical Chemistry, 2013, 93(6), 679-691.
61	Bendiocarb	2,2-dimethyl-1,3-benzodioxol-4-yl methylcarbamate	22781-23-3	Apple	Malus pumila Mill.	*	Flesh	I	*	4.2	4.2	4.2	Stuart I.A.; Ansell R.O.; MacLachlan J.; Bather P.A. Surface partitioning studies of N-methylcarbamate-treated post-harvest crops using SFE-HPLC-postcolumn reaction-fluorescence. The Analyst, 1999, 124(3), 275-280.
61	Bendiocarb	2,2-dimethyl-1,3-benzodioxol-4-yl methylcarbamate	22781-23-3	Apple	Malus pumila Mill.	*	Peel	I	*	4.5	4.5	4.5	Stuart I.A.; Ansell R.O.; MacLachlan J.; Bather P.A. Surface partitioning studies of N-methylcarbamate-treated post-harvest crops using SFE-HPLC-postcolumn reaction-fluorescence. The Analyst, 1999, 124(3), 275-280.
61	Bendiocarb	2,2-dimethyl-1,3-benzodioxol-4-yl methylcarbamate	22781-23-3	Azalea	Rhododendron spp.	USA	Leaves	O	U	18.3	18.3	18.3	Nigg H.N.; Brady S.S.; Kelly I.D. Dissipation of foliar dislodgeable residues of bendiocarb following application to azaleas. Bulletin of Environmental Contamination and Toxicology, 1992, 48(3), 416-420.
61	Bendiocarb	2,2-dimethyl-1,3-benzodioxol-4-yl methylcarbamate	22781-23-3	Banana	Musa spp.	*	Flesh	I	*	6.1	6.1	6.1	Stuart I.A.; Ansell R.O.; MacLachlan J.; Bather P.A. Surface partitioning studies of N-methylcarbamate-treated post-harvest crops using SFE-HPLC-postcolumn reaction-fluorescence. The Analyst, 1999, 124(3), 275-280.
61	Bendiocarb	2,2-dimethyl-1,3-benzodioxol-4-yl methylcarbamate	22781-23-3	Banana	Musa spp.	*	Fruit skin	I	*	8	8	8	Stuart I.A.; Ansell R.O.; MacLachlan J.; Bather P.A. Surface partitioning studies of N-methylcarbamate-treated post-harvest crops using SFE-HPLC-postcolumn reaction-fluorescence. The Analyst, 1999, 124(3), 275-280.
61	Bendiocarb	2,2-dimethyl-1,3-benzodioxol-4-yl methylcarbamate	22781-23-3	Onion	Allium cepa	*	Fruit skin	I	*	4	4	4	Stuart I.A.; Ansell R.O.; MacLachlan J.; Bather P.A. Surface partitioning studies of N-methylcarbamate-treated post-harvest crops using SFE-HPLC-postcolumn reaction-fluorescence. The Analyst, 1999, 124(3), 275-280.
61	Bendiocarb	2,2-dimethyl-1,3-benzodioxol-4-yl methylcarbamate	22781-23-3	Onion	Allium cepa	*	Flesh	I	*	5.4	5.4	5.4	Stuart I.A.; Ansell R.O.; MacLachlan J.; Bather P.A. Surface partitioning studies of N-methylcarbamate-treated post-harvest crops using SFE-HPLC-postcolumn reaction-fluorescence. The Analyst, 1999, 124(3), 275-280.
61	Bendiocarb	2,2-dimethyl-1,3-benzodioxol-4-yl methylcarbamate	22781-23-3	Pear	Pyrus communis	*	Flesh	I	*	3.9	3.9	3.9	Stuart I.A.; Ansell R.O.; MacLachlan J.; Bather P.A. Surface partitioning studies of N-methylcarbamate-treated post-harvest crops using SFE-HPLC-postcolumn reaction-fluorescence. The Analyst, 1999, 124(3), 275-280.
61	Bendiocarb	2,2-dimethyl-1,3-benzodioxol-4-yl methylcarbamate	22781-23-3	Pear	Pyrus communis	*	Fruit skin	I	*	4.6	4.6	4.6	Stuart I.A.; Ansell R.O.; MacLachlan J.; Bather P.A. Surface partitioning studies of N-methylcarbamate-treated post-harvest crops using SFE-HPLC-postcolumn reaction-fluorescence. The Analyst, 1999, 124(3), 275-280.
61	Bendiocarb	2,2-dimethyl-1,3-benzodioxol-4-yl methylcarbamate	22781-23-3	Potato	Solanum tuberosum	*	Tuber flesh	I	*	3.6	3.6	3.6	Stuart I.A.; Ansell R.O.; MacLachlan J.; Bather P.A. Surface partitioning studies of N-methylcarbamate-treated post-harvest crops using SFE-HPLC-postcolumn reaction-fluorescence. The Analyst, 1999, 124(3), 275-280.
61	Bendiocarb	2,2-dimethyl-1,3-benzodioxol-4-yl methylcarbamate	22781-23-3	Potato	Solanum tuberosum	*	Tuber skin	I	*	4.9	4.9	4.9	Stuart I.A.; Ansell R.O.; MacLachlan J.; Bather P.A. Surface partitioning studies of N-methylcarbamate-treated post-harvest crops using SFE-HPLC-postcolumn reaction-fluorescence. The Analyst, 1999, 124(3), 275-280.
62	Benfluralin	N-butyl-N-ethyl-2,6-dinitro-4-(trifluoromethyl)benzenamine	1861-40-1	Turfgrass	Poa pratensis L. Pennstar-Fylking-Prato blend	USA	Thatch	I	F	61.6	61.6	61.6	Hurto, K. A., Turgeon, A. J., & Cole, M. A. (1979). Degradation of benefin and DCPA in thatch and soil from a Kentucky bluegrass (Poa pratensis) turf. Weed Science, 154-157.
63	Benfuracarb	2,3-dihydro-2,2-dimethyl-7-benzofuranyl 2-methyl-4-(1-methylethyl)-7-oxo-8-oxa-3-thia-2,4-diazadecanoate	82560-54-1	Eggplant	Solanum melongena cv. Pant rituraj	India	Fruit	I	F	3.9	4.73	4.32	Chandra R.; Srivastava A.; Srivastava P.C. Fate of Benfuracarb Insecticide in Mollisols and Brinjal Crop. Bulletin of Environmental Contamination and Toxicology, 2009, 83(3), 348-351.
65	Benodanil	2-iodo-N-phenylbenzamide	15310-01-7	Tobacco	Nicotiana tabacum	Zimbabwe	Leaves	I	F	3.47	4.08	3.78	Cole J.S.; Zvenyika Z. The extraction, estimation and persistence of benodanil fungicide in tobacco tissues. Pesticide Science, 1981, 12(2), 199-205. Calcuated.
65	Benodanil	2-iodo-N-phenylbenzamide	15310-01-7	Tobacco	Nicotiana tabacum	Zimbabwe	Whole plant	I	F	9	10.19	9.6	Cole J.S.; Zvenyika Z. The extraction, estimation and persistence of benodanil fungicide in tobacco tissues. Pesticide Science, 1981, 12(2), 199-205. Calcuated.
66	Benomyl	methyl (1-((butylamino)carbonyl)-1H-benzimidazol-2-yl)carbamate	17804-35-2	Apple	Malus pumila	Canada	Leaves	I	F	5.2	7.2	6.05	Chiba M.; Veres D.F. Fate of benomyl and its degradation compound methyl 2-benzimidazolecarbamate on apple foliage. Journal of agricultural and food chemistry, 1981, 29(3), 588-590.
66	Benomyl	methyl (1-((butylamino)carbonyl)-1H-benzimidazol-2-yl)carbamate	17804-35-2	Citrus	Citrus spp.	CA, USA	Leaves	O	U	1.8	1.8	1.8	Liesivuori J.; Liukkonen S.; Pirhonen P. Reentry intervals after pesticide application in greenhouses. Scandinavian Journal of Work, Environment & Health, 1988, 14(suppl 1), 35-36.
66	Benomyl	methyl (1-((butylamino)carbonyl)-1H-benzimidazol-2-yl)carbamate	17804-35-2	Lettuce	Lactuca sativa	*	Leaves	O	U	1.6	1.6	1.6	Goedicke H.J. Exposition durch Rückstände auf Planzenoberflächen nach Anwendung von Pflanzenschutsmittelen im Gewächshaus. [Exposure from foliar residues after use of pesticides in greenhouses], Zeitschrift fur die Gesamte Hygiene und Ihre Grenzgebiete, 1989, 35, 531-533.
66	Benomyl	methyl (1-((butylamino)carbonyl)-1H-benzimidazol-2-yl)carbamate	17804-35-2	Rose	Rosa spp.	*	Leaves	O	U	1.8	1.8	1.8	Liesivuori J.; Liukkonen S.; Pirhonen P. Reentry intervals after pesticide application in greenhouses. Scandinavian Journal of Work, Environment & Health, 1988, 14(suppl 1), 35-36.
70	Bensultap	S,S'-(2-(dimethylamino)-1,3-propanediyl) di(benzenesulfonothioate)	17606-31-4	Soybean	Glycine max genotype Giza-22	Egypt	Leaves	I	F	6.83	6.83	6.83	Thabit T.; Nasr I.; Rashed M. Residues of bensultap and methomyl insecticides on soybean plant with special reference to their potential induced influence on some of the certain stress enzymes activity in seeds. Egypt Journal of Agricultural Research, 2008, 86(6), 2339-2349.
70	Bensultap	S,S'-(2-(dimethylamino)-1,3-propanediyl) di(benzenesulfonothioate)	17606-31-4	Soybean	Glycine max genotype Giza-22	Egypt	Peel	I	F	10.03	10.03	10.03	Thabit T.; Nasr I.; Rashed M. Residues of bensultap and methomyl insecticides on soybean plant with special reference to their potential induced influence on some of the certain stress enzymes activity in seeds. Egypt Journal of Agricultural Research, 2008, 86(6), 2339-2349.
71	Bentazone	3-(1-methylethyl)-1H-2,1,3-benzothiadiazin-4(3H)-one 2,2-dioxide	246-585-8	Wheat	Triticum aestivum L.	China	Combined plant, straw & seed	I	F	0.5	2.4	1.5	Feng X.; Yu J.; Pan L.; Song G.; Zhang H. Dissipation and Residues of Dichlorprop-P and Bentazone in Wheat-Field Ecosystem. International Journal of Environmental Research and Public Health, 2016, 13(6), 534
74	Beta-cyfluthrin	cyano(4-fluoro-3-phenoxyphenyl)methyl 3-(2,2-dichloroethenyl)-2,2-dimethylcyclopropanecarboxylate	68359-37-5	Chickpea	Cicer arietinum var. PBG 5	India	Pods & leaves	O	F	1.06	2.25	1.7	Chahil G.S.; Mandal K.; Sahoo S. K., Battu, R. S., & Singh, B. (2014). Risk assessment of ß-cyfluthrin and imidacloprid in chickpea pods and leaves. Ecotoxicology and Environmental Safety, 101, 177-183.
74	Beta-cyfluthrin	cyano(4-fluoro-3-phenoxyphenyl)methyl 3-(2,2-dichloroethenyl)-2,2-dimethylcyclopropanecarboxylate	68359-37-5	Chickpea	Cicer arietinum var. PBG 5	India	Leaves	O	F	0.58	1.04	0.81	Chahil G.S.; Mandal K.; Sahoo S. K., Battu, R. S., & Singh, B. (2014). Risk assessment of ß-cyfluthrin and imidacloprid in chickpea pods and leaves. Ecotoxicology and Environmental Safety, 101, 177-183.
74	Beta-cyfluthrin	cyano(4-fluoro-3-phenoxyphenyl)methyl 3-(2,2-dichloroethenyl)-2,2-dimethylcyclopropanecarboxylate	68359-37-5	Eggplant	Solanum melongena L. var. Pusa Kranti	India	Fruit	I	F	4.65	4.8	4.73	Sinha S.; Gopal M. Evaluating the Safety of β-Cyfluthrin Insecticide for Usage in Eggplant (Solanum melongena L.) Crop. Bulletin of Environmental Contamination and Toxicology, 2002, 68(3), 400-405.
74	Beta-cyfluthrin	cyano(4-fluoro-3-phenoxyphenyl)methyl 3-(2,2-dichloroethenyl)-2,2-dimethylcyclopropanecarboxylate	68359-37-5	Tea (green)	Camellia sinensis	India	Leaves	I	F	2.89	3.15	3.02	Paramasivam M.; Deepa M.; Selvi C.; Chandrasekaran S. Dissipation kinetics of beta-cyfluthrin and imidacloprid in tea and their transfer from processed tea to infusion. Ecotoxicology and Environmental Safety, 2017, 144, 531-536.
74	Beta-cyfluthrin	cyano(4-fluoro-3-phenoxyphenyl)methyl 3-(2,2-dichloroethenyl)-2,2-dimethylcyclopropanecarboxylate	68359-37-5	Tomato	Lycopersicon esculentum Mill.	India	Leaves	O	F	1.21	2.18	1.7	Dikshit A.K.; Pachauri D.C.; Jindal T. Maximum residue limit and risk assessment of beta-cyfluthrin and imidacloprid on tomato (Lycopersicon esculentum Mill). Bulletin of Environmental Contamination and Toxicology, 2003, 70(6), 1143-1150.
75	Beta cypermethrin	cyano(3-phenoxyphenyl)methyl 3-(2,2-dichloroethenyl)-2,2-dimethylcyclopropanecarboxylate	65731-84-2	Apple	Malus pumila	China	Fruit	I	F	5.04	6.99	6.02	Wang F. Degradation Dynamics of Beta-cypermethrin in Apple and Soil and Its Residue Safety Evaluation. Journal of Anhui Agricultural Sciences, 2010, 38(20), 10837-10838,10855.
75	Beta cypermethrin	cyano(3-phenoxyphenyl)methyl 3-(2,2-dichloroethenyl)-2,2-dimethylcyclopropanecarboxylate	65731-84-2	Cabbage	Brassica oleracea capitata	China	Head	I	F	3.7	3.7	3.7	Yuan Y.-W.; Si C.-G.; Lin H.; Wang J.; Ye Z.-H. Residual Dynamics of Chlorpyrifos, Fenvalerate and Beta-Cypermethrin in Cabbage. Journal of Agro-Environment Science, 2008, 27(3), 1199-1202.
3028	Beta-Endosulfan	3alpha,5abeta,6beta,9beta,9abeta-6,7,8,9,10,10-hexachloro-1,5,5a,6,9,9a-hexahydro-6,9-methano-2,4,3-oxidebeta-Endosulfan	33213-65-9	Eggplant	Solanum macrocarpon L.	West Africa	Leaves	O	F	0.28	0.28	0.28	Rosendahl I.; Laabs V.; Atcha-Ahowé C.; James B.; Amelung W. Insecticide dissipation from soil and plant surfaces in tropical horticulture of southern Benin, West Africa. Journal of Environmental Monitoring, 2009, 11, 1157-1164.
3028	Beta-Endosulfan	3alpha,5abeta,6beta,9beta,9abeta-6,7,8,9,10,10-hexachloro-1,5,5a,6,9,9a-hexahydro-6,9-methano-2,4,3-oxidebeta-Endosulfan	33213-65-9	Muskmelon	Cucumis melo	KY, USA	Fruit	O	F	2.53	2.53	2.53	Antonious G.; Hill R.; Ross K.; Coolong T. Dissipation, half-lives, and mass spectrometric identification of endosulfan isomers and the sulfate metabolite on three field-grown vegetables. Journal of Environmental Science and Health, 2002, 47(5), 369-378
3028	Beta-Endosulfan	3alpha,5abeta,6beta,9beta,9abeta-6,7,8,9,10,10-hexachloro-1,5,5a,6,9,9a-hexahydro-6,9-methano-2,4,3-oxidebeta-Endosulfan	33213-65-9	Pepper (bell)	Capsicum annuum L.	KY, USA	Fruit	O	F	3.04	3.04	3.04	Antonious G.; Hill R.; Ross K.; Coolong T. Dissipation, half-lives, and mass spectrometric identification of endosulfan isomers and the sulfate metabolite on three field-grown vegetables. Journal of Environmental Science and Health, 2002, 47(5), 369-378
3028	Beta-Endosulfan	3alpha,5abeta,6beta,9beta,9abeta-6,7,8,9,10,10-hexachloro-1,5,5a,6,9,9a-hexahydro-6,9-methano-2,4,3-oxidebeta-Endosulfan	33213-65-9	Pepper (bell)	Capsicum annuum L. cv Bell Boy Hybrid	KY, USA	Fruit	O	F	1.8	4.9	3.35	Antonious G.F.; Byers M.E.; Snyder J.C. Residues and fate of endosulfan on field‐grown pepper and tomato. Pest Management Science, 1998, 54(1), 61-67.
3028	Beta-Endosulfan	3alpha,5abeta,6beta,9beta,9abeta-6,7,8,9,10,10-hexachloro-1,5,5a,6,9,9a-hexahydro-6,9-methano-2,4,3-oxidebeta-Endosulfan	33213-65-9	Pepper (bell)	Capsicum annuum L. cv Bell Boy Hybrid	KY, USA	Leaves	O	F	0.9	1.8	1.35	Antonious G.F.; Byers M.E.; Snyder J.C. Residues and fate of endosulfan on field‐grown pepper and tomato. Pest Management Science, 1998, 54(1), 61-67.
3028	Beta-Endosulfan	3alpha,5abeta,6beta,9beta,9abeta-6,7,8,9,10,10-hexachloro-1,5,5a,6,9,9a-hexahydro-6,9-methano-2,4,3-oxidebeta-Endosulfan	33213-65-9	Tea	Camellia sinensis	India	Shoots	I	F	2.62	2.62	2.62	Barooah A.K.; Borthakur M. Dissipation of Pesticides in Tea Shoots and the Effect of Washing. Pesticide Research Journal, 2008, 20(1), 121-124.
3028	Beta-Endosulfan	3alpha,5abeta,6beta,9beta,9abeta-6,7,8,9,10,10-hexachloro-1,5,5a,6,9,9a-hexahydro-6,9-methano-2,4,3-oxidebeta-Endosulfan	33213-65-9	Tomato	Lycopersicon esculentum Mill. cv. Mountain Spring F1	KY, USA	Fruit	O	F	0.7	2.2	1.45	Antonious G.F.; Byers M.E.; Snyder J.C. Residues and fate of endosulfan on field‐grown pepper and tomato. Pest Management Science, 1998, 54(1), 61-67.
3028	Beta-Endosulfan	3alpha,5abeta,6beta,9beta,9abeta-6,7,8,9,10,10-hexachloro-1,5,5a,6,9,9a-hexahydro-6,9-methano-2,4,3-oxidebeta-Endosulfan	33213-65-9	Tomato	Lycopersicon esculentum Mill. cv. Mountain Spring F1	KY, USA	Leaves	O	F	0.8	4.1	2.45	Antonious G.F.; Byers M.E.; Snyder J.C. Residues and fate of endosulfan on field‐grown pepper and tomato. Pest Management Science, 1998, 54(1), 61-67.
3028	Beta-Endosulfan	3alpha,5abeta,6beta,9beta,9abeta-6,7,8,9,10,10-hexachloro-1,5,5a,6,9,9a-hexahydro-6,9-methano-2,4,3-oxidebeta-Endosulfan	33213-65-9	Tomato	Lycopersicon esculentum Mill. var. Power	Ghana	Leaves	I	F	0.92	0.92	0.92	Ntow W.J.; Ameyibor J.; Kelderman P.; Drechsel P.; Gijzen H.J. Dissipation of endosulfan in field-grown tomato (Lycopersicon esculentum) and cropped soil at Akumadan, Ghana. Journal of Agricultural and Food Chemistry, 2007, 55(26), 10864-10871.
76	Bifenazate	1-methylethyl 2-(4-methoxy[1,1'-biphenyl]-3-yl)hydrazinecarboxylate	149877-41-8	Tea (black)	Camellia sinensis	India	Shoots	I	F	1.03	1.36	1.2	Satheshkumar A.; Senthurpandian V.K.; Shanmugaselvan V.A. Dissipation kinetics of bifenazate in tea under tropical conditions. Food chemistry, 2014, 145, 1092-1096
78	Bifenthrin	(2-methyl(1,1'-biphenyl)-3-yl)methyl (1R,3R)-rel-3-((1Z)-2-chloro-3,3,3-trifluoro-1-propenyl)-2,2-dimethylcyclopropanecarboxylate	82657-04-3	Cabbage	Brassica oleracea capitata	China	Head	I	F	7.7	9	8.35	Chen L.-X.; Han B.-J.; Peng L.-X. Residue analysis and degradation of bifenthrin in cabbage and soil under tropical climate. Modern Agrochemicals, 2008, 7(5), 32-35.
78	Bifenthrin	(2-methyl(1,1'-biphenyl)-3-yl)methyl (1R,3R)-rel-3-((1Z)-2-chloro-3,3,3-trifluoro-1-propenyl)-2,2-dimethylcyclopropanecarboxylate	82657-04-3	Cabbage	Brassica oleracea capitata	China	Above ground plant	I	F	3.2	9.6	6.4	Shi K.; Li L.; Li W.; Yuan L.; Liu, F. Chronic and acute risk assessment of human exposed to novaluron-bifenthrin mixture in cabbage. Environmental Monitoring and Assessment, 2016 188(9), 528.
78	Bifenthrin	(2-methyl(1,1'-biphenyl)-3-yl)methyl (1R,3R)-rel-3-((1Z)-2-chloro-3,3,3-trifluoro-1-propenyl)-2,2-dimethylcyclopropanecarboxylate	82657-04-3	Chickpea	Cicer arietinum var Pusa 256	India	Fruit	O	F	2.89	4.3	3.6	Mukherjee I.; Singh R.; Govil J.N. Risk Assessment of a Synthetic Pyrethroid, Bifenthrin on Pulses. Bulletin of Environmental Contamination and Toxicology, 2010, 84(3), 294-300.
78	Bifenthrin	(2-methyl(1,1'-biphenyl)-3-yl)methyl (1R,3R)-rel-3-((1Z)-2-chloro-3,3,3-trifluoro-1-propenyl)-2,2-dimethylcyclopropanecarboxylate	82657-04-3	Citrus (nursery stock)	Citrus spp.	CA, USA	Seedlings	O	U	5	49	27	Schneider F.; Welsh A.M.; Quan V. Bifenthrin Dislodgeable Foliar Residues Following Reduced-volume and Conventional Pesticide Applications in Greenhouses. State of California, Environmental Protection Agency, Department of Pesticide Regulation, Registration and Health Evaluation Division, Worker Health and Safety Branch, 1997.
78	Bifenthrin	(2-methyl(1,1'-biphenyl)-3-yl)methyl (1R,3R)-rel-3-((1Z)-2-chloro-3,3,3-trifluoro-1-propenyl)-2,2-dimethylcyclopropanecarboxylate	82657-04-3	Eggplant	Solanum melongena	India	Fruit	I	F	2.5	2.5	2.5	Gupta S.; Sharma R.K.; Sinha S.R.; Gupta R.K.; Gajbhiye V.T. Persistence of Some New Insecticides in Brinjal and their Efficacy against Brinjal Leafhopper and Borer. Pesticide Research Journal, 2007, 19(2), 205-209.
78	Bifenthrin	(2-methyl(1,1'-biphenyl)-3-yl)methyl (1R,3R)-rel-3-((1Z)-2-chloro-3,3,3-trifluoro-1-propenyl)-2,2-dimethylcyclopropanecarboxylate	82657-04-3	Eggplant	Solanum macrocarpon L.	West Africa	Leaves	O	F	0.28	0.28	0.28	Rosendahl I.; Laabs V.; Atcha-Ahowé C.; James B.; Amelung W. Insecticide dissipation from soil and plant surfaces in tropical horticulture of southern Benin, West Africa. Journal of Environmental Monitoring, 2009, 11, 1157-1164.
78	Bifenthrin	(2-methyl(1,1'-biphenyl)-3-yl)methyl (1R,3R)-rel-3-((1Z)-2-chloro-3,3,3-trifluoro-1-propenyl)-2,2-dimethylcyclopropanecarboxylate	82657-04-3	Green bean	Phaseolus vulgaris	Spain	Fruit	I	F	0.89	0.89	0.89	Martinez Galera M.; Gil Garcia M.D.; Rodriguez Lallena J.A.; Lopez Lopez T.; Martinez Vidal J.L. Dissipation of pyrethroid residues in peppers, zucchinis, and green beans exposed to field treatments in greenhouses: evaluation by decline curves. Journal of Agricultural and Food Chemistry, 2003, 51(19), 5745-5751.
78	Bifenthrin	(2-methyl(1,1'-biphenyl)-3-yl)methyl (1R,3R)-rel-3-((1Z)-2-chloro-3,3,3-trifluoro-1-propenyl)-2,2-dimethylcyclopropanecarboxylate	82657-04-3	Green bean	Phaseolus vulgaris	Morocco	Fruit	I	U	0.94	1	0.97	Bouri M.; Salghi R.; Bazzi L.; Zarrouk A.; Rios A.; Zougagh M. Pesticide Residue Levels in Green Beans Cultivated in Souss Masa Valley (Morocco) After Multiple Applications of Bifenthrin and λ-Cyhalothrin. Bulletin of Environmental Contamination and Toxicology, 2012, 89(3), 638-643.
78	Bifenthrin	(2-methyl(1,1'-biphenyl)-3-yl)methyl (1R,3R)-rel-3-((1Z)-2-chloro-3,3,3-trifluoro-1-propenyl)-2,2-dimethylcyclopropanecarboxylate	82657-04-3	Okra	Abelmoschus esculantus L. cv. Moench	India	Fruit	I	F	1.32	1.58	1.45	Gupta S.; Sharma R.K.; Gupta R.K.; Sinha S.R.; Singh R.; Gajbhiye V.T. Persistence of new insecticides and their efficacy against insect pests of okra. Bulletin of Environmental Contamination and Toxicology, 2009, 82(2), 243-247.
78	Bifenthrin	(2-methyl(1,1'-biphenyl)-3-yl)methyl (1R,3R)-rel-3-((1Z)-2-chloro-3,3,3-trifluoro-1-propenyl)-2,2-dimethylcyclopropanecarboxylate	82657-04-3	Peanut	Arachis hypogaea	India	Stalk	I	F	2.1	2.5	2.3	Reddy A.R.; Divakar B.J. Estimation and dissipation of bifenthrin and chlorpyriphos residues from groundnut stalk and seed. Pestology, 2007, 31, 13-15.
78	Bifenthrin	(2-methyl(1,1'-biphenyl)-3-yl)methyl (1R,3R)-rel-3-((1Z)-2-chloro-3,3,3-trifluoro-1-propenyl)-2,2-dimethylcyclopropanecarboxylate	82657-04-3	Peach	Prunus persica	Greece	Skin	I	F	5	23	14	Papadopoulou-Mourkidou E.; Kotopoulou A.; Stylianidis D. Field dissipation of the pyrethroid insecticide/acaricide biphenthrin on the foliage of peach trees, in the peel and pulp of peaches, and in tomatoes. Annals of Applied Biology, 1989, 115(3), 405
78	Bifenthrin	(2-methyl(1,1'-biphenyl)-3-yl)methyl (1R,3R)-rel-3-((1Z)-2-chloro-3,3,3-trifluoro-1-propenyl)-2,2-dimethylcyclopropanecarboxylate	82657-04-3	Peach	Prunus persica	Greece	Pulp	I	F	5	12	8.5	Papadopoulou-Mourkidou E.; Kotopoulou A.; Stylianidis D. Field dissipation of the pyrethroid insecticide/acaricide biphenthrin on the foliage of peach trees, in the peel and pulp of peaches, and in tomatoes. Annals of Applied Biology, 1989, 115(3), 405
78	Bifenthrin	(2-methyl(1,1'-biphenyl)-3-yl)methyl (1R,3R)-rel-3-((1Z)-2-chloro-3,3,3-trifluoro-1-propenyl)-2,2-dimethylcyclopropanecarboxylate	82657-04-3	Peach	Prunus persica	Greece	Leaves	I	F	9	23	16	Papadopoulou-Mourkidou E.; Kotopoulou A.; Stylianidis D. Field dissipation of the pyrethroid insecticide/acaricide biphenthrin on the foliage of peach trees, in the peel and pulp of peaches, and in tomatoes. Annals of Applied Biology, 1989, 115(3), 405
78	Bifenthrin	(2-methyl(1,1'-biphenyl)-3-yl)methyl (1R,3R)-rel-3-((1Z)-2-chloro-3,3,3-trifluoro-1-propenyl)-2,2-dimethylcyclopropanecarboxylate	82657-04-3	Pepper	Capsicum spp.	Spain	Fruit	I	U	1.08	1.08	1.08	Martinez Galera M.; Gil Garcia M.D.; Rodriguez Lallena J.A.; Lopez Lopez T.; Martinez Vidal J.L. Dissipation of pyrethroid residues in peppers, zucchinis, and green beans exposed to field treatments in greenhouses: evaluation by decline curves. Journal of Agricultural and Food Chemistry, 2003, 51(19), 5745-5751.
78	Bifenthrin	(2-methyl(1,1'-biphenyl)-3-yl)methyl (1R,3R)-rel-3-((1Z)-2-chloro-3,3,3-trifluoro-1-propenyl)-2,2-dimethylcyclopropanecarboxylate	82657-04-3	Pigeon pea	Cajanus cajan var. Pusa 855	India	Fruit	O	F	3.34	3.34	3.34	Mukherjee I.; Singh R.; Govil J.N. Risk Assessment of a Synthetic Pyrethroid, Bifenthrin on Pulses. Bulletin of Environmental Contamination and Toxicology, 2010, 84(3), 294-300.
78	Bifenthrin	(2-methyl(1,1'-biphenyl)-3-yl)methyl (1R,3R)-rel-3-((1Z)-2-chloro-3,3,3-trifluoro-1-propenyl)-2,2-dimethylcyclopropanecarboxylate	82657-04-3	Oilseed rape	Brassica campestris	India	Leaves	O	F	1.17	1.43	1.32	Devee, A., Baruah, A.A.L.H., 2010. Persistence and Dissipation of Imidacloprid and Bifenthrin on Rapeseed Leaves. Pesticide Research Journal 22(1): 59-62.
78	Bifenthrin	(2-methyl(1,1'-biphenyl)-3-yl)methyl (1R,3R)-rel-3-((1Z)-2-chloro-3,3,3-trifluoro-1-propenyl)-2,2-dimethylcyclopropanecarboxylate	82657-04-3	Oilseed rape	Brassica campestris	India	Leaves	O	F	1.17	1.43	1.3	Devee A.; Baruah A.A.L.H. Persistence and Dissipation of Imidacloprid and Bifenthrin on Rapeseed Leaves. Pesticide Research Journal, 2010, 22(1), 59-62.
78	Bifenthrin	(2-methyl(1,1'-biphenyl)-3-yl)methyl (1R,3R)-rel-3-((1Z)-2-chloro-3,3,3-trifluoro-1-propenyl)-2,2-dimethylcyclopropanecarboxylate	82657-04-3	Tall fescue grass	Festuca arundinacea Schreb.	USA	Blades	O	F	2.4	2.4	2.4	John C.V. Determining Pesticide Dislodgeable Foliar Residues and Their Persistence Following Application to Tall Fescue Lawn Turf. PhD Thesis and associated publication
78	Bifenthrin	(2-methyl(1,1'-biphenyl)-3-yl)methyl (1R,3R)-rel-3-((1Z)-2-chloro-3,3,3-trifluoro-1-propenyl)-2,2-dimethylcyclopropanecarboxylate	82657-04-3	Tea	Camellia sinensis l. cv. Oolong	China	Leaves	I	F	9.3	9.4	9.35	Chen L.; ShangGuan L.; Wu Y.; Xu L.; Fu F. Study on the residue and degradation of fluorine-containing pesticides in Oolong tea by using gas chromatography–mass spectrometry. Food Control, 2012, 25(2), 433-440.
78	Bifenthrin	(2-methyl(1,1'-biphenyl)-3-yl)methyl (1R,3R)-rel-3-((1Z)-2-chloro-3,3,3-trifluoro-1-propenyl)-2,2-dimethylcyclopropanecarboxylate	82657-04-3	Tea	Camellia sinensis L.	India	Leaves	I	F	0.52	1.06	0.79	Tewary D.K.; Kumar V.; Ravindranath S.D.; Shanker A. Dissipation behavior of bifenthrin residues in tea and its brew. Food Control, 2005, 16(3), 231-237.
78	Bifenthrin	(2-methyl(1,1'-biphenyl)-3-yl)methyl (1R,3R)-rel-3-((1Z)-2-chloro-3,3,3-trifluoro-1-propenyl)-2,2-dimethylcyclopropanecarboxylate	82657-04-3	Tea	Camellia sinensis L. O. Kuntze	India	Leaves	I	F	1.17	1.9	1.41	Baruah A.A.L.H.; Devee A.; Choudhury K. Dissipation Studies of Bifenthrin and Dimethoate in Tea [Camellia sinensis (L.) O. Kuntze]. Pesticide Research Journal, 2010, 22(2), 195-197.
78	Bifenthrin	(2-methyl(1,1'-biphenyl)-3-yl)methyl (1R,3R)-rel-3-((1Z)-2-chloro-3,3,3-trifluoro-1-propenyl)-2,2-dimethylcyclopropanecarboxylate	82657-04-3	Tea	Camellia sinensis L. O. Kuntze	China	Leaves	I	F	2.5	2.5	2.5	Zongmao C.; Haibin W. Factors affecting residues of pesticides in tea. Pesticide Science, 1998, 23(2), 109-118.
78	Bifenthrin	(2-methyl(1,1'-biphenyl)-3-yl)methyl (1R,3R)-rel-3-((1Z)-2-chloro-3,3,3-trifluoro-1-propenyl)-2,2-dimethylcyclopropanecarboxylate	82657-04-3	Tea	Camellia sinensis L. O. Kuntze	China	Leaves	I	F	3.2	3.2	3.2	Zongmao C.; Haibin W. Degradation of Pesticides on Plant Surfaces and its Prediction - A Case Study on Tea Plant. Environmental Monitoring and Assessment, 1997, 44(1-3), 303-313.
78	Bifenthrin	(2-methyl(1,1'-biphenyl)-3-yl)methyl (1R,3R)-rel-3-((1Z)-2-chloro-3,3,3-trifluoro-1-propenyl)-2,2-dimethylcyclopropanecarboxylate	82657-04-3	Tomato	Lycopersicon esculentum Mill.	Greece	Fruit	I	F	1.83	2.32	2.08	Papadopoulou-Mourkidou E.; Kotopoulou A.; Stylianidis D. Field dissipation of the pyrethroid insecticide/acaricide biphenthrin on the foliage of peach trees, in the peel and pulp of peaches, and in tomatoes. Annals of Applied Biology, 1989, 115(3), 405
78	Bifenthrin	(2-methyl(1,1'-biphenyl)-3-yl)methyl (1R,3R)-rel-3-((1Z)-2-chloro-3,3,3-trifluoro-1-propenyl)-2,2-dimethylcyclopropanecarboxylate	82657-04-3	Tomato	Lycopersicon esculentum Mill.	Greece	Fruit	I	F	5	5	5	Papadopoulou-Mourkidou E.; Kotopoulou A.; Stylianidis D. Field dissipation of the pyrethroid insecticide/acaricide biphenthrin on the foliage of peach trees, in the peel and pulp of peaches, and in tomatoes. Annals of Applied Biology, 1989, 115(3), 405
78	Bifenthrin	(2-methyl(1,1'-biphenyl)-3-yl)methyl (1R,3R)-rel-3-((1Z)-2-chloro-3,3,3-trifluoro-1-propenyl)-2,2-dimethylcyclopropanecarboxylate	82657-04-3	Tomato	Lycopersicon esculentum Mill.	India	Fruit	I	F	1.83	2.05	1.94	Chauhan R.; Monga S.; Kumari B. Dissipation and decontamination of bifenthrin residues in tomato (Lycopersicon esculentum Mill). Bulletin of Environmental Contamination and Toxicology, 2012, 89(1), 181-186.
78	Bifenthrin	(2-methyl(1,1'-biphenyl)-3-yl)methyl (1R,3R)-rel-3-((1Z)-2-chloro-3,3,3-trifluoro-1-propenyl)-2,2-dimethylcyclopropanecarboxylate	82657-04-3	Zucchini	Cucurbita pepo var. Cylindrica	Spain	Fruit	I	U	0.11	1.06	0.59	Martinez Galera M.; Gil Garcia M.D.; Rodriguez Lallena J.A.; Lopez Lopez T.; Martinez Vidal J.L. Dissipation of pyrethroid residues in peppers, zucchinis, and green beans exposed to field treatments in greenhouses: evaluation by decline curves. Journal of Agricultural and Food Chemistry, 2003, 51(19), 5745-5751.
3106	Bismerthiazol	5,5'-(methylenediimino)bis(1,3,4-thiadiazole-2(3H)-thione	79319-85-0	Chinese cabbage	Brassica rapa subsp. pekinensis	China	Leaves	I	F	2.4	2.5	2.5	Wu J.; Zhang H.; Wan, K.; Wang C. Determination and study on dissipation and residue of bismerthiazol and its metabolite in Chinese cabbage and soil. Environmental Monitoring and Assessment, 2014, 186(2), 1195-1202.
83	Bispyribac-sodium	sodium 2,6-bis((4,6-dimethoxy-2-pyrimidinyl)oxy)benzoate	125401-92-5	Annual bluegrass	Poa annua L.	USA	Blades	I	F	7	7	7	McCullough P E.; Hart S.E.; Gianfagna T.J.; Chaves F.C. Bispyribac-sodium metabolism in annual bluegrass, creeping bentgrass, and perennial ryegrass. Weed Science, 2009, 57(5), 470-473.
83	Bispyribac-sodium	sodium 2,6-bis((4,6-dimethoxy-2-pyrimidinyl)oxy)benzoate	125401-92-5	Creeping bentgrass	Agrostis stolonifera L. var. L-93	USA	Blades	I	F	1	1	1	McCullough P E.; Hart S.E.; Gianfagna T.J.; Chaves F.C. Bispyribac-sodium metabolism in annual bluegrass, creeping bentgrass, and perennial ryegrass. Weed Science, 2009, 57(5), 470-473.
83	Bispyribac-sodium	sodium 2,6-bis((4,6-dimethoxy-2-pyrimidinyl)oxy)benzoate	125401-92-5	Perennial ryegrass	Lolium perenne L. var. Manhattan 4	USA	Blades	I	F	2	2	2	McCullough P E.; Hart S.E.; Gianfagna T.J.; Chaves F.C. Bispyribac-sodium metabolism in annual bluegrass, creeping bentgrass, and perennial ryegrass. Weed Science, 2009, 57(5), 470-473.
84	Bitertanol	beta-([1,1'-biphenyl]-4-yloxy)-a-(1,1-dimethylethyl)-1H-1,2,4-triazole-1-ethanol	55179-31-2	Apple	Malus pumila Mill.	India	Fruit	I	F	4	11.5	7.75	Sharma I.D.; Nath A. Determination of Bitertanol Residues in Apple Applied for the Control of Apple Scab (Venturia inaequalis L.). Pesticide Research Journal, 1992, 4(2), 155-158.
84	Bitertanol	beta-([1,1'-biphenyl]-4-yloxy)-a-(1,1-dimethylethyl)-1H-1,2,4-triazole-1-ethanol	55179-31-2	Apple	Malus pumila Mill.	India	Leaves	I	F	4.6	6.7	5.65	Sharma I.D.; Nath A. Determination of Bitertanol Residues in Apple Applied for the Control of Apple Scab (Venturia inaequalis L.). Pesticide Research Journal, 1992, 4(2), 155-158.
84	Bitertanol	beta-([1,1'-biphenyl]-4-yloxy)-a-(1,1-dimethylethyl)-1H-1,2,4-triazole-1-ethanol	55179-31-2	Apricot	Prunus armeniaca cv. Boccuccia	Italy	Fruit	O	F	16.9	16.9	16.9	Cabras P.; Angioni A.; Garau V.L.; Melis M.; Pirisi F.M.; Cabitza F.; Cubeddu M. Pesticide Residues on Field-Sprayed Apricots and in Apricot Drying Processes. Journal of Agricultural and Food Chemistry, 1998, 46(6), 2306-2308.
84	Bitertanol	beta-([1,1'-biphenyl]-4-yloxy)-a-(1,1-dimethylethyl)-1H-1,2,4-triazole-1-ethanol	55179-31-2	Chrysanthemum	Chrysanthemum morifolium	*	Leaves	O	U	2.5	2.5	2.5	Brouwer D.H.; de Haan M.; Leenheers L.H.; de Vreede S.A.F.; van Hemmen J.J. Half-Lives of Pesticides on Greenhouse Crops. Bulletin of Environmental Contamination and Toxicology, 1997, 58(6), 976-984.
84	Bitertanol	beta-([1,1'-biphenyl]-4-yloxy)-a-(1,1-dimethylethyl)-1H-1,2,4-triazole-1-ethanol	55179-31-2	Peanut	Arachis hypogaea	China	Fruit	I	F	2.7	3	2.85	Yu J.-l.; Song G.-C.; Li R.-J.; Wang S. Residue dynamics of bitertanol in peanut and soil. Agrochemicals, 2006, 45(8), 554-555
86	Boscalid	2-chloro-N-(4'-chloro[1,1'-biphenyl]-2-yl)-3-pyridinecarboxamide	188425-85-6	Cucumber	Cucumis sativus L.	China	Fruit	I	U	1.3	1.3	1.3	Jin-long Q.; Chen-lei M.; Jue W.; Chun-yan, H.; Hui-ming W. Uptake and Degradation of Boscalid in Cucumber Plants. Journal of Agrochemicals, 2013, 5, 017.
86	Boscalid	2-chloro-N-(4'-chloro[1,1'-biphenyl]-2-yl)-3-pyridinecarboxamide	188425-85-6	Cucumber	Cucumis sativus L.	China	Leaves	I	U	3.5	3.5	3.5	Jin-long Q.; Chen-lei M.; Jue W.; Chun-yan, H.; Hui-ming W. Uptake and Degradation of Boscalid in Cucumber Plants [J]. Agrochemicals, 2013, 5, 017.
86	Boscalid	2-chloro-N-(4'-chloro[1,1'-biphenyl]-2-yl)-3-pyridinecarboxamide	188425-85-6	Lettuce	Lactuca sativa L. cv. Lolla Rosa	Republic of Korea	Leaves	I	U	8.7	8.7	8.7	Hwang J-I.; Lee S-E.; Kim J-E.; Comparison of theoretical and experimental values for plant uptake of pesticide from soil. PLOSone, 2017, 12(2), e0172254
86	Boscalid	2-chloro-N-(4'-chloro[1,1'-biphenyl]-2-yl)-3-pyridinecarboxamide	188425-85-6	Grape	Vitis vinifera	China	Fruit	I	F	9.9	12	10.95	Zhang Y.-T.; Guo Y.-Z.; Liu L.; Shao H.; Li H.; Li N.The Residues Dynamics of Boscalid in Grape and Soil. Agrochemicals, 2011, 50(1), 51-52.
86	Boscalid	2-chloro-N-(4'-chloro[1,1'-biphenyl]-2-yl)-3-pyridinecarboxamide	188425-85-6	Green bean	Phaseolus vulgaris	Egypt	Leaves	O	F	5.3	5.3	5.3	Hanafi A.; Garau V.L.; Caboni P.; Sarais G.; Cabras P. Minor crops for export: A case study of boscalid, pyraclostrobin, lufenuron and lambda-cyhalothrin residue levels on green beans and spring onions in Egypt. Journal of Environmental Science and Health Part B, 2010, 45(6), 493-500.
86	Boscalid	2-chloro-N-(4'-chloro[1,1'-biphenyl]-2-yl)-3-pyridinecarboxamide	188425-85-6	Spring onion	Allium fistulosum	Egypt	Leaves	O	F	8.5	8.5	8.5	Hanafi A.; Garau V.L.; Caboni P.; Sarais G.; Cabras P. Minor crops for export: A case study of boscalid, pyraclostrobin, lufenuron and lambda-cyhalothrin residue levels on green beans and spring onions in Egypt. Journal of Environmental Science and Health Part B, 2010, 45(6), 493-500.
86	Boscalid	2-chloro-N-(4'-chloro[1,1'-biphenyl]-2-yl)-3-pyridinecarboxamide	188425-85-6	Strawberry	Fragaria glandiglora Ehrn	China	Fruit	I	F	4.9	6.4	5.65	Chen L.; Zhang S. Dissipation and Residues of Boscalid in Strawberries and Soils. Bulletin of Environmental Contamination and Toxicology, 2010, 84(3), 301-304.
86	Boscalid	2-chloro-N-(4'-chloro[1,1'-biphenyl]-2-yl)-3-pyridinecarboxamide	188425-85-6	Tomato	Lycopersicon esculentum Mill. var. Marissa	Poland	Fruit	I	U	2.88	2.88	2.88	Jankowska M.; Kaczynski P.; Hrynko I.; Lozowicka B. Dissipation of six fungicides in greenhouse-grown tomatoes with processing and health risk. Environmental Science and Pollution Research, 2016, 23(12), 11885-11900.
86	Boscalid	2-chloro-N-(4'-chloro[1,1'-biphenyl]-2-yl)-3-pyridinecarboxamide	188425-85-6	Tomato	Lycopersicon esculentum Mill. var. Harzfeuer	Poland	Fruit	I	U	3.09	3.09	3.09	Jankowska M.; Kaczynski P.; Hrynko I.; Lozowicka B. Dissipation of six fungicides in greenhouse-grown tomatoes with processing and health risk. Environmental Science and Pollution Research, 2016, 23(12), 11885-11900.
93	Bromophos	O-(4-bromo-2,5-dichlorophenyl) O,O-dimethyl phosphorothioate	2104-96-3	Clover	Trifolium spp.	Egypt	Leaves	O	F	1.3	1.4	1.4	El‐Sebae A.H.; El‐Sayed A.M. Persistence of malathion and bromophos on bean and clover crops. Journal of Applied Entomology, 1969, 64(1‐4), 378-384.
93	Bromophos	O-(4-bromo-2,5-dichlorophenyl) O,O-dimethyl phosphorothioate	2104-96-3	Tomato	Lycopersicon esculentum Mill.	Germany	Leaves	I	U	0.35	0.35	0.35	Stiasni M.; Deckers W.; Schmidt K.; Simon H. Translocation, penetration, and metabolism of O-(4-bromo-2,5-dichlorophenyl)-O,O-dimethyl phosphorothioate (bromophos) in tomato plants. Journal of Agricultural and Food Chemistry, 1969, 17, 1017–1020.
462	Bromomethane	bromomethane	74-83-9	Avocado	Persea americana	*	Fruit	I	F	1	1	1	Lindgren D.L.; Sinclair W.B. Tolerance of citrus and avocado fruits to fumigants effective against the oriental fruit fly. Journal of Economic Entomology, 1951, 44(6), 980-990.
462	Bromomethane	bromomethane	74-83-9	Cucumber	Cucumis sativus L.	China	Fruit	I	U	10.3	14.2	12.25	Qi Y. Degradation Dynamics of Methyl Bromide in Soil and Cucumber. Agro-Environmental Protection, 1997, 16(3), 108-111,143.
462	Bromomethane	bromomethane	74-83-9	Orange	Citrus x sinensis	*	Peel	I	F	1	1	1	Lindgren D.L.; Sinclair W.B. Tolerance of citrus and avocado fruits to fumigants effective against the oriental fruit fly. Journal of Economic Entomology, 1951, 44(6), 980-990.
95	Bromopropylate	1-methylethyl 4-bromo-alpha-(4-bromophenyl)-alpha-hydroxybenzeneacetate	18181-80-1	Artichoke	Cynara scolymus	Spain	Heart	I	F	1.9	2.13	2.02	Barba A.; Camara M.A.; Navarro Garcia S.; Sanchez‐Fresneda C.; Lopez de Hierro N.; Acebes A. Disappearance of bromopropylate residues in artichokes, strawberries and beans. Journal of Environmental Science and Health, 1991, 26(3), 323-332. Calcuated.
95	Bromopropylate	1-methylethyl 4-bromo-alpha-(4-bromophenyl)-alpha-hydroxybenzeneacetate	18181-80-1	Artichoke	Cynara scolymus	Spain	Fruit	I	F	2.01	2.1	2.06	Barba A.; Camara M.A.; Navarro Garcia S.; Sanchez‐Fresneda C.; Lopez de Hierro N.; Acebes A. Disappearance of bromopropylate residues in artichokes, strawberries and beans. Journal of Environmental Science and Health, 1991, 26(3), 323-332. Calcuated.
95	Bromopropylate	1-methylethyl 4-bromo-alpha-(4-bromophenyl)-alpha-hydroxybenzeneacetate	18181-80-1	Green bean	Phaseolus vulgaris var. Strike	Spain	Fruit	I	F	13.86	17.77	15.82	Barba A.; Camara M.A.; Navarro Garcia S.; Sanchez‐Fresneda C.; Lopez de Hierro N.; Acebes A. Disappearance of bromopropylate residues in artichokes, strawberries and beans. Journal of Environmental Science and Health, 1991, 26(3), 323-332. Calcuated.
95	Bromopropylate	1-methylethyl 4-bromo-alpha-(4-bromophenyl)-alpha-hydroxybenzeneacetate	18181-80-1	Strawberry	Fragaria x ananassa var. Chandler	Spain	Fruit	I	F	3.11	3.25	3.18	Barba A.; Camara M.A.; Navarro Garcia S.; Sanchez‐Fresneda C.; Lopez de Hierro N.; Acebes A. Disappearance of bromopropylate residues in artichokes, strawberries and beans. Journal of Environmental Science and Health, 1991, 26(3), 323-332. Calcuated.
95	Bromopropylate	1-methylethyl 4-bromo-alpha-(4-bromophenyl)-alpha-hydroxybenzeneacetate	18181-80-1	Tomato	Lycopersicon esculentum Mill.	*	Fruit	I	U	7.7	7.7	7.7	Juraske R.; Antón A.; Castells F. Estimating half-lives of pesticides in/on vegetation for use in multimedia fate and exposure models. Chemosphere, 2008, 70(10), 1748-1755.
96	Bromoxynil	3,5-dibromo-4-hydroxybenzonitrile	1689-84-5	Maize	Zea mays (summer grown)	China	Seedlings	I	F	1.1	1.18	1.14	Chen X.-X.; Li W.-M.; Wu Q.; Zhi Y.-N.; Han L.-J. Bromoxynil residues and dissipation rates in maize crops and soil. Ecotoxicology and Environmental Safety, 2011, 74(6), 1659-1663.
96	Bromoxynil	3,5-dibromo-4-hydroxybenzonitrile	1689-84-5	Wheat (spring)	Triticum aestivum L. var. Neepawa	Canada	Straw	I	F	3.19	3.19	3.19	Grover R.; Smith A.E.; Cessna A.J. Fate of Bromoxynil n-Butyrate and iso-Octanoate Applied as a Mixture to a Wheat Field. Journal of Environmental Quality, 1994, 23(6), 1304-1311. Calculated.
746	Bromoxynil octanate	2,6-dibromo-4-cyanophenyl octanoate	1689-99-2	Maize	Zea mays	China	Seedling leaves	I	F	2.2	4.2	3.2	Liu X.-G.; Dong F.-S.; Zheng Y.-Q.; Li Y.-B. Determination of Bromoxynil Octanoate in Soil and Corn by GC with Electron Capture and Mass Spectrometry Detection Under Field Conditions. Journal of AOAC International, 2009, 92(3), 919-926.
746	Bromoxynil octanate	2,6-dibromo-4-cyanophenyl octanoate	1689-99-2	Wheat (spring)	Triticum aestivum L. var. Neepawa	Canada	Straw	I	F	1.85	1.85	1.85	Grover R.; Smith A.E.; Cessna A.J. Fate of Bromoxynil n-Butyrate and iso-Octanoate Applied as a Mixture to a Wheat Field. Journal of Environmental Quality, 1994, 23(6), 1304-1311. Calcuated
99	Bupirimate	5-butyl-2-(ethylamino)-6-methyl-4-pyrimidinyl dimethylsulfamate	41483-43-6	Cucumber	Cucumis sativus L.	Netherlands	Leaves	O	U	3.5	3.5	3.5	Schipper H.J.; Brouwer D.; van Hemmen J. Exposure to pesticides during re-entry activities in greenhouses. Field study in cucumber crop, TNO report V98.1076,, 1998, TNO, Netherlands
100	Buprofezin	2-((1,1-dimethylethyl)imino)tetrahydro-3-(1-methylethyl)-5-phenyl-4H-1,3,5-thiadiazin-4-one	69327-76-0	Clementine	Citrus clementina cv. SRA 63	Italy	Pulp	I	F	3.54	3.54	3.54	Cabras P.; Angioni A.; Garau V.L.; Melis M.; Pirisi F.M.; Cabitza F.; Dedola F.; Navickiene S. Determination of Buprofezin, Pyridaben, and Tebufenpyrad Residues by Gas Chromatography - Mass-Selective Detection in Clementine Citrus. Journal of Agricultural and Food Chemistry, 1998, 46(10), 4255-4259.
100	Buprofezin	2-((1,1-dimethylethyl)imino)tetrahydro-3-(1-methylethyl)-5-phenyl-4H-1,3,5-thiadiazin-4-one	69327-76-0	Clementine	Citrus clementina cv. SRA 63	Italy	Fruit	I	F	5.82	5.82	5.82	Cabras P.; Angioni A.; Garau V.L.; Melis M.; Pirisi F.M.; Cabitza F.; Dedola F.; Navickiene S. Determination of Buprofezin, Pyridaben, and Tebufenpyrad Residues by Gas Chromatography - Mass-Selective Detection in Clementine Citrus. Journal of Agricultural and Food Chemistry, 1998, 46(10), 4255-4259.
100	Buprofezin	2-((1,1-dimethylethyl)imino)tetrahydro-3-(1-methylethyl)-5-phenyl-4H-1,3,5-thiadiazin-4-one	69327-76-0	Clementine	Citrus clementina cv. SRA 63	Italy	Peel	I	F	6.08	6.08	6.08	Cabras P.; Angioni A.; Garau V.L.; Melis M.; Pirisi F.M.; Cabitza F.; Dedola F.; Navickiene S. Determination of Buprofezin, Pyridaben, and Tebufenpyrad Residues by Gas Chromatography - Mass-Selective Detection in Clementine Citrus. Journal of Agricultural and Food Chemistry, 1998, 46(10), 4255-4259.
100	Buprofezin	2-((1,1-dimethylethyl)imino)tetrahydro-3-(1-methylethyl)-5-phenyl-4H-1,3,5-thiadiazin-4-one	69327-76-0	Eggplant	Solanum melongena var. Madonna	Spain	Fruit	I	U	3.1	6.1	4.6	Valverde-Garcia A.; Gonzalez-Pradas E.; Aguilera-Del Real A. Analysis of buprofezin residues in vegetables. Application to the degradation study on eggplant grown in a greenhouse. Journal of Agricultural and Food Chemistry, 1993, 41(12), 2319-2323.
100	Buprofezin	2-((1,1-dimethylethyl)imino)tetrahydro-3-(1-methylethyl)-5-phenyl-4H-1,3,5-thiadiazin-4-one	69327-76-0	Grape	Vitis vinifera L. var. Thompson Seedless	Chile	Fruit	I	F	3	5	4	Oulkar D.P.; Banerjee K.; Patil S.H.; Upadhyay A.K.; Taware P.B.; Deshmukh M.B.; Adsule P.G. Degradation kinetics and safety evaluation of buprofezin residues in grape (Vitis vinifera L.) and three different soils of India. Pest Management Science, 2009, 5(2), 183-188.
100	Buprofezin	2-((1,1-dimethylethyl)imino)tetrahydro-3-(1-methylethyl)-5-phenyl-4H-1,3,5-thiadiazin-4-one	69327-76-0	Grape	Vitis vinifera L. var. Savignon Blanc	Chile	Fruit	I	F	10.8	10.8	10.8	Alister C.; Araya M.; Morandé J.E.; Volosky C.; Torrico J.S.; Cordova A.; Kogan M. Effects of wine grape cultivar, application conditions and the winemaking process on the dissipation of six pesticides. Ciencia e investigación agraria: revista latinoamericana de ciencias de la agricultura, 2014, 41(3), 375-386
100	Buprofezin	2-((1,1-dimethylethyl)imino)tetrahydro-3-(1-methylethyl)-5-phenyl-4H-1,3,5-thiadiazin-4-one	69327-76-0	Grape	Vitis vinifera L. var. Pinot Noir		Fruit	I	F	9.8	9.8	9.9	Alister C.; Araya M.; Morandé J.E.; Volosky C.; Torrico J.S.; Cordova A.; Kogan M. Effects of wine grape cultivar, application conditions and the winemaking process on the dissipation of six pesticides. Ciencia e investigación agraria: revista latinoamericana de ciencias de la agricultura, 2014, 41(3), 375-386
100	Buprofezin	2-((1,1-dimethylethyl)imino)tetrahydro-3-(1-methylethyl)-5-phenyl-4H-1,3,5-thiadiazin-4-one	69327-76-0	Olive	Olea europaea	Italy	Fruit	I	F	9.5	13.4	11.45	Cabras P.; Angioni A.; Garau V.L.; Pirisi F.M.; Cabitza F.; Pala, M. Acephate and buprofezin residues in olives and olive oil. Food Additives and Contaminants, 2000, 17(10), 855-858.
100	Buprofezin	2-((1,1-dimethylethyl)imino)tetrahydro-3-(1-methylethyl)-5-phenyl-4H-1,3,5-thiadiazin-4-one	69327-76-0	Melon (Oriental)	Cucumis melon var. Makuwa	Republic of Korea	Fruit	I	F	3	3.9	3.45	Kim H.N.; Kim, S.B.; Choi, E.; Woo M.J.; Kim J.Y.; Saravanan M.; Hur, J.H. Establishment of Pre-Harvest Residue Limit for Buprofezin and Penthiopyrad during Cultivation of Oriental melon (Cucumis melon var. makuwa). The Korean Journal of Pesticide Science, 2014, 18(3), 123-129.
100	Buprofezin	2-((1,1-dimethylethyl)imino)tetrahydro-3-(1-methylethyl)-5-phenyl-4H-1,3,5-thiadiazin-4-one	69327-76-0	Pepper	Capsicum annuum L. cv. Almuden	Spain	Fruit	I	U	16.28	16.28	16.28	Fenoll J.; Ruiz E.; Hellín P.; Lacasa A.; Flores P. Dissipation rates of insecticides and fungicides in peppers grown in greenhouse and under cold storage conditions. Food Chemistry, 2009, 113(2), 727-732.
100	Buprofezin	2-((1,1-dimethylethyl)imino)tetrahydro-3-(1-methylethyl)-5-phenyl-4H-1,3,5-thiadiazin-4-one	69327-76-0	Pepper	Capsicum annuum L. cv. Almuden	Spain	Fruit	I	X (cold storage)	260.4	245.7	253.05	Fenoll J.; Ruiz E.; Hellín P.; Lacasa A.; Flores P. Dissipation rates of insecticides and fungicides in peppers grown in greenhouse and under cold storage conditions. Food Chemistry, 2009, 113(2), 727-732.
100	Buprofezin	2-((1,1-dimethylethyl)imino)tetrahydro-3-(1-methylethyl)-5-phenyl-4H-1,3,5-thiadiazin-4-one	69327-76-0	Pomegranate	Punica granatum var. Bhagwa	India	Fruit	I	F	5.75	5.75	5.75	Utture S.C.; Banerjee K.; Kolekar S.S.; Dasgupta S.; Oulkar D.P.; Patil S.H.; ... Anuse M.A. Food safety evaluation of buprofezin, dimethoate and imidacloprid residues in pomegranate. Food Chemistry, 2012, 131(3), 787-795.
106	Cadusafos	O-ethyl S,S-bis(1-methylpropyl) phosphorodithioate	95465-99-9	Chickpea	Cicer arietinum L. cv. Pulsa 362	India	Fruit	I	F	28.7	29.9	29.3	Meher H.C.; Gajbhiye V.T.; Singh G.; Kamra A.; Chawla G. Persistence and Nematicidal Efficacy of Carbosulfan, Cadusafos, Phorate, and Triazophos in Soil and Uptake by Chickpea and Tomato Crops under Tropical Conditions. Journal of Agricultural and Food Chemistry, 2010, 58(3), 1815-1822.
106	Cadusafos	O-ethyl S,S-bis(1-methylpropyl) phosphorodithioate	95465-99-9	Tomato	Lycopersicon esculentum Mill. cv. Pusa Ruby	India	Fruit	I	F	21.8	24.2	23	Meher H.C.; Gajbhiye V.T.; Singh G.; Kamra A.; Chawla G. Persistence and Nematicidal Efficacy of Carbosulfan, Cadusafos, Phorate, and Triazophos in Soil and Uptake by Chickpea and Tomato Crops under Tropical Conditions. Journal of Agricultural and Food Chemistry, 2010, 58(3), 1815-1822.
112	Camphechlor	2,2,5-endo,6-exo,8,8,9,10-Octachlorobornane	8001-35-2	Alfalfa	Medicago sativa	CA, USA	Leaves	O	F	5	5	5	Akesson N.B.; Yates W.E. Problems relating to application of agricultural chemicals and resulting drift residues. Annual Review of Entomology, 9, 285-318
112	Camphechlor	2,2,5-endo,6-exo,8,8,9,10-Octachlorobornane	8001-35-2	Alfalfa	Medicago sativa	USA	Leaves	I	F	16	16	16	Dahm P.A. Effects of weathering and commercial dehydration upon residues of aldrin, chlordane, and toxaphene applied to alfalfa. Journal of Economic Entomology, 1952, 45(5), 763-766.
112	Camphechlor	2,2,5-endo,6-exo,8,8,9,10-Octachlorobornane	8001-35-2	Birdsfoot trefoil	Lotus corniculatus	VT, USA	Leaves	O	F	4.9	4.9	4.9	Willis G.H.; McDowell L.L. Pesticide persistence on foliage. Reviews of Environmental Contamination and Toxicology, 1987, 100, 23-73.
112	Camphechlor	2,2,5-endo,6-exo,8,8,9,10-Octachlorobornane	8001-35-2	Collard	Brassica oleracea acephala	NC, USA	Leaves	I	F	2.3	2.3	2.3	Willis G.H.; McDowell L.L. Pesticide persistence on foliage. Reviews of Environmental Contamination and Toxicology, 1987, 100, 23-73.
112	Camphechlor	2,2,5-endo,6-exo,8,8,9,10-Octachlorobornane	8001-35-2	Cotton	Gossypium hirsutum L.	USA	Leaves	I	X (agro-ecosystem chamber)	19.3	19.3	19.3	Nash R.G.; Beall Jr. M.L.; Harris W.G. Toxaphene and 1,1,1-trichloro-2,2-bis(p-chlorophenyl)ethane (DDT) losses from cotton in an agroecosystem chamber. Journal of Agricultural and Food Chemistry, 1977, 25(2), 336-341.
112	Camphechlor	2,2,5-endo,6-exo,8,8,9,10-Octachlorobornane	8001-35-2	Cotton	Gossypium hirsutum L.	TX, USA	Leaves	O	F	1.6	1.6	1.6	Willis G.H.; McDowell L.L. Pesticide persistence on foliage. Reviews of Environmental Contamination and Toxicology, 1987, 100, 23-73.
112	Camphechlor	2,2,5-endo,6-exo,8,8,9,10-Octachlorobornane	8001-35-2	Cotton	Gossypium hirsutum L.	MS, USA	Leaves	I	F	7.8	7.8	7.8	Willis G.H.; McDowell L.L. Pesticide persistence on foliage. Reviews of Environmental Contamination and Toxicology, 1987, 100, 23-73.
112	Camphechlor	2,2,5-endo,6-exo,8,8,9,10-Octachlorobornane	8001-35-2	Cotton	Gossypium hirsutum L.	MD, USA	Leaves	I	F	15.1	15.1	15.1	Willis G.H.; McDowell L.L. Pesticide persistence on foliage. Reviews of Environmental Contamination and Toxicology, 1987, 100, 23-73.
112	Camphechlor	2,2,5-endo,6-exo,8,8,9,10-Octachlorobornane	8001-35-2	Cotton	Gossypium hirsutum L.	CA, USA	Leaves	I	F	25.2	25.2	25.2	Willis G.H.; McDowell L.L. Pesticide persistence on foliage. Reviews of Environmental Contamination and Toxicology, 1987, 100, 23-73.
112	Camphechlor	2,2,5-endo,6-exo,8,8,9,10-Octachlorobornane	8001-35-2	Kale	Brassica oleracea var. Sabellica	MD, USA	Leaves	I	F	2.3	2.3	2.3	Willis G.H.; McDowell L.L. Pesticide persistence on foliage. Reviews of Environmental Contamination and Toxicology, 1987, 100, 23-73.
112	Camphechlor	2,2,5-endo,6-exo,8,8,9,10-Octachlorobornane	8001-35-2	Pangola grass	Digitaria eriantha	FL, USA	Leaves	O	F	1.7	3.7	2.7	Willis G.H.; McDowell L.L. Pesticide persistence on foliage. Reviews of Environmental Contamination and Toxicology, 1987, 100, 23-73.
114	Captan	3a,4,7,7a-tetrahydro-2-[(trichloromethyl)thio]-1H-isoindole-1,3(2H)-dione	133-06-2	Apple	Malus pumila Mill. cv. Brookfield	Italy	Fruit	O	F	4.07	6.06	5.07	Passarella I.; Elia I.; Guarino B.; Bourlot G.; Nègre M. Evaluation of the field dissipation of fungicides and insecticides used on fruit bearing trees in northern Italy. Journal of Environmental Science and Health, 2009, 44(2), 137-143.
114	Captan	3a,4,7,7a-tetrahydro-2-[(trichloromethyl)thio]-1H-isoindole-1,3(2H)-dione	133-06-2	Apple	Malus pumila Mill. cv. Golden delicious	Italy	Fruit	O	F	6.01	6.06	6.04	Passarella I.; Elia I.; Guarino B.; Bourlot G.; Nègre M. Evaluation of the field dissipation of fungicides and insecticides used on fruit bearing trees in northern Italy. Journal of Environmental Science and Health, 2009, 44(2), 137-143.
114	Captan	3a,4,7,7a-tetrahydro-2-[(trichloromethyl)thio]-1H-isoindole-1,3(2H)-dione	133-06-2	Apple	Malus pumila Mill.	UK	Fruit	O	F	5.02	10.35	7.69	Xu X.-M.; Murray R.A.; Salazar J.D.; Hyder K. The temporal pattern of captan residues on apple leaves and fruit under field conditions in relation to weather and canopy structure. Pest Management Science, 2008, 64(5), 565-578.
114	Captan	3a,4,7,7a-tetrahydro-2-[(trichloromethyl)thio]-1H-isoindole-1,3(2H)-dione	133-06-2	Cauliflower	Brassica oleracea botrytis L. var. Day Dream, Dunkeld, Cristina, 4085, Sonta & Fargo	Spain	Head	I	F	0.9	0.9	0.9	Fernández-Cruz M.L.; Barreda M.; Villarroya M.; Peruga A.; Llanos S.; García-Baudín J.M. Captan and fenitrothion dissipation in field-treated cauliflowers and effect of household processing. Pest Management Science, 2006, 62(7), 637-645.
114	Captan	3a,4,7,7a-tetrahydro-2-[(trichloromethyl)thio]-1H-isoindole-1,3(2H)-dione	133-06-2	Cherry	Prunus avium	Canada	Fruit	O	F	3.57	8.45	6.01	Northover J.; Frank R.; Braun H.E. Dissipation of captan residues from cherry and peach fruits. Journal of Agricultural and Food Chemistry, 1986, 34(3), 525-529.
114	Captan	3a,4,7,7a-tetrahydro-2-[(trichloromethyl)thio]-1H-isoindole-1,3(2H)-dione	133-06-2	Chinese cabbage	Brassica rapa subsp. pekinensis cv. Kasumi	Canada	Leaves	O	F	1.7	1.7	1.7	Ripley B.D.; Ritcey G.M.; Harris C.R.; Denommé M.A.; Lissemore L.I. Comparative Persistence of Pesticides on Selected Cultivars of Speciality Vegetables. Journal of Agricultural and Food Chemistry, 2003, 51(5), 1328-1335.
114	Captan	3a,4,7,7a-tetrahydro-2-[(trichloromethyl)thio]-1H-isoindole-1,3(2H)-dione	133-06-2	Grape	Vitis vinifera	Canada	Fruit	O	F	12.84	12.84	12.84	Frank R.; Northover J.; Braun H.E. Persistence of captan on apples, grapes, and pears in Ontario, Canada, 1981-1983. Journal of Agricultural and Food Chemistry, 1985, 33(3), 514-518.
114	Captan	3a,4,7,7a-tetrahydro-2-[(trichloromethyl)thio]-1H-isoindole-1,3(2H)-dione	133-06-2	Mango	Mangifera indica	*	Fruit	I	F	2.3	2.5	2.4	Awasthi M.D.; Sharma D. Uptake of Fungicides from Post-harvest treatment and their Persistence in Ripening Mango Fruits. Pesticide Research Journal, 1997, 9(1), 41-45.
114	Captan	3a,4,7,7a-tetrahydro-2-[(trichloromethyl)thio]-1H-isoindole-1,3(2H)-dione	133-06-2	Orchard fruit	*	Netherlands	Leaves	O	F	10	17	14	de Cock J.; Heederik D.; Boleij J.S.; Kromhout H.; Hoek F.; Wegh H.; Ny E.T. Determinants of exposure to captan in fruit growing. American Industrial Hygiene Association, 1998, 59(3), 166-172.
114	Captan	3a,4,7,7a-tetrahydro-2-[(trichloromethyl)thio]-1H-isoindole-1,3(2H)-dione	133-06-2	Pear	Pyrus communis L. cv. Conference	Italy	Fruit	O	F	1.05	1.06	1.06	Passarella I.; Elia I.; Guarino B.; Bourlot G.; Nègre M. Evaluation of the field dissipation of fungicides and insecticides used on fruit bearing trees in northern Italy. Journal of Environmental Science and Health, 2009, 44(2), 137-143.
114	Captan	3a,4,7,7a-tetrahydro-2-[(trichloromethyl)thio]-1H-isoindole-1,3(2H)-dione	133-06-2	Strawberry	Fragaria x ananassa	Florida, USA	Leaves	O	F	2.53	6.83	4.68	Stamper J.H.; Nigg H.N.; Queen R.M. Dislodgeable captan residues at Florida strawberry farms. Chemosphere, 1987, 16(6), 1257-1271.
114	Captan	3a,4,7,7a-tetrahydro-2-[(trichloromethyl)thio]-1H-isoindole-1,3(2H)-dione	133-06-2	Strawberry	Fragaria x ananassa var. Pajaro	CA, USA	Fruit	O	F	6.65	6.81	6.73	Giles D.; Blewett T. Effects of Conventional and Reduced-Volume, Charged-Spray Application Techniques on Dislodgeable Foliar Residue of Captan on Strawberries. Journal of Agricultural and Food Chemistry, 1991, 39(9), 1646-1651.
114	Captan	3a,4,7,7a-tetrahydro-2-[(trichloromethyl)thio]-1H-isoindole-1,3(2H)-dione	133-06-2	Strawberry	Fragaria x ananassa	USA	Leaves	O	F	7.1	7.1	7.1	Zweig G.; Leffingwell J.T.; Popendorf W. The relationship between dermal pesticide exposure by fruit harvesters and dislodgeable foliar residues. Journal of Environmental Science and Health, 1985, 20(1), 27-59.
114	Captan	3a,4,7,7a-tetrahydro-2-[(trichloromethyl)thio]-1H-isoindole-1,3(2H)-dione	133-06-2	Strawberry	Fragaria x ananassa	CA, USA	Leaves	O	*	9	9	9	Winterlin W.; Mourer C.; Bailey J.B. Degradation of four organophosphate insecticides in grape tissues. Pesticides Monitoring Journal, 1974, 8(1), 59-65.
114	Captan	3a,4,7,7a-tetrahydro-2-[(trichloromethyl)thio]-1H-isoindole-1,3(2H)-dione	133-06-2	Tomato	Lycopersicon esculentum Mill. cv. Bond	Spain	Fruit	I	U	2.5	2.5	2.5	Juraske R.; Antón A.; Castells F.; Huijbregts M.A.J. Human intake fractions of pesticides via greenhouse tomato consumption: Comparing model estimates with measurements for Captan. Chemosphere, 2007, 67(6), 1102-1107.
114	Captan	3a,4,7,7a-tetrahydro-2-[(trichloromethyl)thio]-1H-isoindole-1,3(2H)-dione	133-06-2	Tomato	Lycopersicon esculentum Mill.	Egypt	Fruit	O	U	2.5	11.2	7.85	El-Zemaity M.S. Degradation behavior of captan and folpet on greenhouse tomatoes. Bulletin of Environmental Contamination and Toxicology, 1988, 40(1), 80-85.
115	Carbaryl	1-naphthalenyl methylcarbamate	63-25-2	Apple	Malus pumila Mill.	*	Peel	I	*	3.9	3.9	3.9	Stuart I.A.; Ansell R.O.; MacLachlan J.; Bather P.A. Surface partitioning studies of N-methylcarbamate-treated post-harvest crops using SFE-HPLC-postcolumn reaction-fluorescence. The Analyst, 1999, 124(3), 275-280.
115	Carbaryl	1-naphthalenyl methylcarbamate	63-25-2	Apple	Malus pumila Mill.		Fruit	O	F	4	4	4	Johnson D.P.; Stansbury H.A. Carbamate Insecticides, Adaptation of Sevin Insecticide (Carbaryl) Residue Method to Various Crops. Journal of Agricultural and Food Chemistry, 1965, 13(3), 235-238.
115	Carbaryl	1-naphthalenyl methylcarbamate	63-25-2	Apple	Malus pumila Mill.	*	Flesh	I	*	4.5	4.5	4.5	Stuart I.A.; Ansell R.O.; MacLachlan J.; Bather P.A. Surface partitioning studies of N-methylcarbamate-treated post-harvest crops using SFE-HPLC-postcolumn reaction-fluorescence. The Analyst, 1999, 124(3), 275-280.
115	Carbaryl	1-naphthalenyl methylcarbamate	63-25-2	Aspen	Populus tremuloides	*	Leaves	O	F	8	8	8	Pieper G.R. Residue analysis of carbaryl on forest foliage and in stream water using HPLC. Bulletin of Environmental Contamination and Toxicology, 1979, 22(1), 167-171.
115	Carbaryl	1-naphthalenyl methylcarbamate	63-25-2	Banana	Musa spp.	*	Flesh	I	*	4.7	4.7	4.7	Stuart I.A.; Ansell R.O.; MacLachlan J.; Bather P.A. Surface partitioning studies of N-methylcarbamate-treated post-harvest crops using SFE-HPLC-postcolumn reaction-fluorescence. The Analyst, 1999, 124(3), 275-280.
115	Carbaryl	1-naphthalenyl methylcarbamate	63-25-2	Banana	Musa spp.	*	Peel	I	*	7.6	7.6	7.6	Stuart I.A.; Ansell R.O.; MacLachlan J.; Bather P.A. Surface partitioning studies of N-methylcarbamate-treated post-harvest crops using SFE-HPLC-postcolumn reaction-fluorescence. The Analyst, 1999, 124(3), 275-280.
115	Carbaryl	1-naphthalenyl methylcarbamate	63-25-2	Cotton	Gossypium hirsutum	CA, USA	Leaves	O	F	1	3	2	Iwata Y.; Duesch M.E.; Carman G.E.; Gunther F.A. Worker environment research: residues from carbaryl, chlorobenzilate, dimethoate, and trichlorfon applied to citrus trees. Journal of Agricultural and Food Chemistry, 1979, 27(6), 1141-1145.
115	Carbaryl	1-naphthalenyl methylcarbamate	63-25-2	Cotton	Gossypium hirsutum	AZ, USA	Leaves	O	F	1.2	1.3	1.25	Ware G.W.; Estesen B.; Cahill W.P. Dislodgable insecticide residues on cotton. Bulletin of Environmental Contamination and Toxicology, 1975, 14(5), 606-609
115	Carbaryl	1-naphthalenyl methylcarbamate	63-25-2	Cucumber	Cucumis sativus L.	Iran	Fruit	O	U	3.2	3.2	3.2	Hassanzadeh N.; Bahramifar N.; Esmaili-Sari A. Residue content of carbaryl applied on greenhouse cucumbers and its reduction by duration of a pre-harvest interval and post-harvest household processing. Journal of the Science of Food and Agriculture, 2010, 90(13), 2249-2253.
115	Carbaryl	1-naphthalenyl methylcarbamate	63-25-2	Douglas fir	Pseudotsuga menziesii	USA	Needles	O	F	4.5	4.5	4.5	Pieper G.R. Residue analysis of carbaryl on forest foliage and in stream water using HPLC. Bulletin of Environmental Contamination and Toxicology, 1979, 22(1), 167-171.
115	Carbaryl	1-naphthalenyl methylcarbamate	63-25-2	Eggplant	Solanum melongena	India	Fruit	O	F	4.13	4.13	4.13	Dhas S.; Srivastava M. An Assessment of Carbaryl Residues on Brinjal Crop in an Agricultural Field in Bikaner, Rajasthan (India). Asian Journal of Agricultural Sciences, 2010, 2(1), 15-17.
115	Carbaryl	1-naphthalenyl methylcarbamate	63-25-2	Forest foliage	*	*	Foliage	O	X (forest)	8	8	8	Pieper G.R. Residue analysis of carbaryl on forest foliage and in stream water using HPLC. Bulletin of Environmental Contamination and Toxicology, 1979, 22(1), 167-171.
115	Carbaryl	1-naphthalenyl methylcarbamate	63-25-2	Geranium	Pelargonium spp.	USA	Leaves	O	F	3	3	3	Pieper G.R. Residue analysis of carbaryl on forest foliage and in stream water using HPLC. Bulletin of Environmental Contamination and Toxicology, 1979, 22(1), 167-171.
115	Carbaryl	1-naphthalenyl methylcarbamate	63-25-2	Green bean	Phaseolus vulgaris	*	Leaves	O	F	4	4	4	Johnson D.P.; Stansbury H.A. Carbamate Insecticides, Adaptation of Sevin Insecticide (Carbaryl) Residue Method to Various Crops. Journal of Agricultural and Food Chemistry, 1965, 13(3), 235-238.
115	Carbaryl	1-naphthalenyl methylcarbamate	63-25-2	Jute	Corchorus olitorius	India	Leaves	I	F	2.79	3.16	2.98	Halve A.K.; Galhotra R.; Garg P.K.; Pandey S.Y.; Sharma V.K. Sivasankaran K. Dissipation of carbaryl and BPMC residues in and/or on jute foliage. Tropical Pest Management , 1986, 32(1), 52-54.
115	Carbaryl	1-naphthalenyl methylcarbamate	63-25-2	Lettuce	Lactuca sativa	*	Head	O	F	4	4	4	Johnson D.P.; Stansbury H.A. Carbamate Insecticides, Adaptation of Sevin Insecticide (Carbaryl) Residue Method to Various Crops. Journal of Agricultural and Food Chemistry, 1965, 13(3), 235-238.
115	Carbaryl	1-naphthalenyl methylcarbamate	63-25-2	Lemon	Citrus x limon	CA, USA	Leaves	O	F	22	22	22	Iwata Y.; Duesch M.E.; Carman G.E.; Gunther F.A. Worker environment research: residues from carbaryl, chlorobenzilate, dimethoate, and trichlorfon applied to citrus trees. Journal of Agricultural and Food Chemistry, 1979, 27(6), 1141-1145.
115	Carbaryl	1-naphthalenyl methylcarbamate	63-25-2	Lima bean	Phaseolus lunatus L.	MD, USA	Leaves	I	F	3.5	29.5	16.5	Argauer R.J.; Webb R.E. rapid fluorometric evaluation of deposition and persistence of carbaryl in the presence of an adjuvant on bean and tomato leaves. Journal of Agriculture, and Food Chemistry, 1972, 20, 732-734
115	Carbaryl	1-naphthalenyl methylcarbamate	63-25-2	Mandarin (Kinnow)	Citrus reticulata hybrid Kinnow	India	Fruit	I	F	13.15	16	14.6	Chandel R.S.; Sharma I.D.; Patyal, S.K. Carbaryl Residues in Citrus Fruits (Kinnow mandarin) and Soil. Pesticide Research Journal, 2016, 28(1), 52-56.
115	Carbaryl	1-naphthalenyl methylcarbamate	63-25-2	Onion	Allium cepa	*	Bulb skin	I	F	3.8	3.8	3.8	Stuart I.A.; Ansell R.O.; MacLachlan J.; Bather P.A. Surface partitioning studies of N-methylcarbamate-treated post-harvest crops using SFE-HPLC-postcolumn reaction-fluorescence. The Analyst, 1999, 124(3), 275-280.
115	Carbaryl	1-naphthalenyl methylcarbamate	63-25-2	Onion	Allium cepa	*	Flesh	I	F	4	4	4	Stuart I.A.; Ansell R.O.; MacLachlan J.; Bather P.A. Surface partitioning studies of N-methylcarbamate-treated post-harvest crops using SFE-HPLC-postcolumn reaction-fluorescence. The Analyst, 1999, 124(3), 275-280.
115	Carbaryl	1-naphthalenyl methylcarbamate	63-25-2	Orange	Citrus x sinensis	CA, USA	Leaves	O	F	14	14	14	Iwata Y.; Duesch M.E.; Carman G.E.; Gunther F.A. Worker environment research: residues from carbaryl, chlorobenzilate, dimethoate, and trichlorfon applied to citrus trees. Journal of Agricultural and Food Chemistry, 1979, 27(6), 1141-1145.
115	Carbaryl	1-naphthalenyl methylcarbamate	63-25-2	Pakchoi	Brassica rapa subsp. chinensis	*	Leaves	I	F	0.5	0.5	0.5	Zhou J.-G.; Guo, Z.-Y.; Liang J.; Feng L.-P. Residue Analysis and Degradation Dynamics of Carbaryl in Pakchoi and Vegetable Soil. Agrochemicals, 2008, 47(11), 823-824,831.
115	Carbaryl	1-naphthalenyl methylcarbamate	63-25-2	Pakchoi	Brassica rapa subsp. chinensis	Guam	Leaves	O	F	2	2	2	Marutani M.; Edirveerasingam V. Shade covers Affect Degradation of Carbaryl on Field-grown Pakchoi. HortTechnology, 2003, 13(4), 637-640.
115	Carbaryl	1-naphthalenyl methylcarbamate	63-25-2	Pakchoi	Brassica rapa subsp. chinensis	Guam	Leaves	O	X (75% shade)	9	9	9	Marutani M.; Edirveerasingam V. Shade covers Affect Degradation of Carbaryl on Field-grown Pakchoi. HortTechnology, 2003, 13(4), 637-640.
115	Carbaryl	1-naphthalenyl methylcarbamate	63-25-2	Pakchoi	Brassica rapa subsp. chinensis	Guam	Leaves	O	X (56% shade)	8	8	8	Marutani M.; Edirveerasingam V. Shade covers Affect Degradation of Carbaryl on Field-grown Pakchoi. HortTechnology, 2003, 13(4), 637-640.
115	Carbaryl	1-naphthalenyl methylcarbamate	63-25-2	Pakchoi	Brassica rapa subsp. chinensis	Guam	Leaves	O	X (33% shade)	6.5	6.5	6.5	Marutani M.; Edirveerasingam V. Shade covers Affect Degradation of Carbaryl on Field-grown Pakchoi. HortTechnology, 2003, 13(4), 637-640.
115	Carbaryl	1-naphthalenyl methylcarbamate	63-25-2	Pakchoi	Brassica rapa subsp. chinensis	Guam	Leaves	O	X (13% shade)	4	4	4	Marutani M.; Edirveerasingam V. Shade covers Affect Degradation of Carbaryl on Field-grown Pakchoi. HortTechnology, 2003, 13(4), 637-640.
115	Carbaryl	1-naphthalenyl methylcarbamate	63-25-2	Pear	Pyrus communis	Uruguay	Fruit	I	X (under rainshield)	3.01	3.01	3.01	Galietta G.; Egaña E.; Gemelli F.; Maeso D.; Casco N.; Conde P.; Nueñz S. Pesticide dissipation curves in peach, pear and tomato crops in Uruguay. Journal of Environmental Science and Health, 2011, 46(1), 35-40. Calculated.
115	Carbaryl	1-naphthalenyl methylcarbamate	63-25-2	Pear	Pyrus communis	*	Flesh	I	F	3.6	3.6	3.6	Stuart I.A.; Ansell R.O.; MacLachlan J.; Bather P.A. Surface partitioning studies of N-methylcarbamate-treated post-harvest crops using SFE-HPLC-postcolumn reaction-fluorescence. The Analyst, 1999, 124(3), 275-280.
115	Carbaryl	1-naphthalenyl methylcarbamate	63-25-2	Pear	Pyrus communis	*	Fruit skin	I	F	3.6	3.6	3.6	Stuart I.A.; Ansell R.O.; MacLachlan J.; Bather P.A. Surface partitioning studies of N-methylcarbamate-treated post-harvest crops using SFE-HPLC-postcolumn reaction-fluorescence. The Analyst, 1999, 124(3), 275-280.
115	Carbaryl	1-naphthalenyl methylcarbamate	63-25-2	Potato	Solanum tuberosum	*	Tuber skin	I	F	3.9	3.9	3.9	Stuart I.A.; Ansell R.O.; MacLachlan J.; Bather P.A. Surface partitioning studies of N-methylcarbamate-treated post-harvest crops using SFE-HPLC-postcolumn reaction-fluorescence. The Analyst, 1999, 124(3), 275-280.
115	Carbaryl	1-naphthalenyl methylcarbamate	63-25-2	Potato	Solanum tuberosum	*	Tuber flesh	I	F	4.4	4.4	4.4	Stuart I.A.; Ansell R.O.; MacLachlan J.; Bather P.A. Surface partitioning studies of N-methylcarbamate-treated post-harvest crops using SFE-HPLC-postcolumn reaction-fluorescence. The Analyst, 1999, 124(3), 275-280.
115	Carbaryl	1-naphthalenyl methylcarbamate	63-25-2	Rice	Oryza sativa	Japan	Grain	I	F	4.42	4.42	4.42	Ishii Y. A comparative study of the persistence of organophosphorous and carbamate insecticides in rice plants at harvesting. Bulletin of the National Institute of Agro-Environmental Sciences, 2004, 23, 1-14. Calculated.
115	Carbaryl	1-naphthalenyl methylcarbamate	63-25-2	Rice	Oryza sativa	Japan	Husk	I	F	4.56	4.56	4.56	Ishii Y. A comparative study of the persistence of organophosphorous and carbamate insecticides in rice plants at harvesting. Bulletin of the National Institute of Agro-Environmental Sciences, 2004, 23, 1-14. Calculated.
115	Carbaryl	1-naphthalenyl methylcarbamate	63-25-2	Rice	Oryza sativa	Japan	Straw	I	F	11.83	11.83	11.83	Ishii Y. A comparative study of the persistence of organophosphorous and carbamate insecticides in rice plants at harvesting. Bulletin of the National Institute of Agro-Environmental Sciences, 2004, 23, 1-14. Calculated.
115	Carbaryl	1-naphthalenyl methylcarbamate	63-25-2	Spinach	Spinacia oleracea	*	Leaves	O	F	3	3	3	Johnson D.P.; Stansbury H.A. Carbamate Insecticides, Adaptation of Sevin Insecticide (Carbaryl) Residue Method to Various Crops. Journal of Agricultural and Food Chemistry, 1965, 13(3), 235-238.
115	Carbaryl	1-naphthalenyl methylcarbamate	63-25-2	Strawberry	Fragaria x ananassa	*	Fruit	O	F	2	2	2	Johnson D.P.; Stansbury H.A. Carbamate Insecticides, Adaptation of Sevin Insecticide (Carbaryl) Residue Method to Various Crops. Journal of Agricultural and Food Chemistry, 1965, 13(3), 235-238.
115	Carbaryl	1-naphthalenyl methylcarbamate	63-25-2	Strawberry	Fragaria x ananassa	USA	Leaves	O	F	4.1	4.1	4.1	Zweig G.; Leffingwell J.T.; Popendorf W. The relationship between dermal pesticide exposure by fruit harvesters and dislodgeable foliar residues. Journal of Environmental Science and Health, 1985, 20(1), 27-59.
115	Carbaryl	1-naphthalenyl methylcarbamate	63-25-2	Tea	Camellia sinensis cv. Oolong	Taiwan	Leaves	O	F	1.8	2.08	1.94	Wu C.-C.; Chu C.; Wang Y.-S.; Lur H.-S. Dissipation of carbofuran and carbaryl on Oolong tea during tea bushes, manufacturing and roasting processes. Journal of Environmental Science and Health, 2007, 42(6), 669-675.
115	Carbaryl	1-naphthalenyl methylcarbamate	63-25-2	Tomato	Lycopersicon esculentum Mill. cv. Mountain Spring F1 Hybrid	*	Seedling leaves	O	F	1.4	1.4	1.4	Antonious, G.F. Residues and Half-Lives of Pyrethrins on Field-Grown Pepper and Tomato. Journal of Environmental Science and Health, 2005, 39(4), 491-503.
115	Carbaryl	1-naphthalenyl methylcarbamate	63-25-2	Tomato	Lycopersicon esculentum Mill.	MD, USA	Leaves	I	F	8.3	25.4	16.9	Argauer R.J.; Webb R.E. rapid fluorometric evaluation of deposition and persistence of carbaryl in the presence of an adjuvant on bean and tomato leaves. Journal of Agriculture, and Food Chemistry, 1972, 20, 732-
115	Carbaryl	1-naphthalenyl methylcarbamate	63-25-2	Tomato	Lycopersicon esculentum Mill.	FL, USA	Leaves	I	F	1.4	1.4	1.4	Blazquez C.H.; Vidyarthi A.D.; Sheehan T.D.; Bennett M.J.; McGrew G.T. Effect of pinolene (. beta.-pinene polymer) on carbaryl foliar residues. Journal of Agricultural and Food Chemistry, 1970, 18(4), 681-684.
116	Carbendazim	methyl 1H-benzimidazol-2-ylcarbamate	10605-21-7	Amaranth (summer)	Amaranthus spp.	China	Leaves	I	F	3.1	3.7	3.4	Fan S.; Zhang F.; Deng K.; Yu C.; Liu S.; Zhao P.; Pan C. Spinach or amaranth contains highest residue of metalaxyl, fluazifop-p-butyl, chlorpyrifos, and lambda-cyhalothrin on six leaf vegetables upon open field application. Journal of Agricultural and Food Chemistry, 2013, 61(9), 2039-2044
116	Carbendazim	methyl 1H-benzimidazol-2-ylcarbamate	10605-21-7	Amaranth (autumn)	Amaranthus spp.	China	Leaves	I	F	9.9	15.9	12.9	Fan S.; Zhang F.; Deng K.; Yu C.; Liu S.; Zhao P.; Pan C. Spinach or amaranth contains highest residue of metalaxyl, fluazifop-p-butyl, chlorpyrifos, and lambda-cyhalothrin on six leaf vegetables upon open field application. Journal of Agricultural and Food Chemistry, 2013, 61(9), 2039-2044
116	Carbendazim	methyl 1H-benzimidazol-2-ylcarbamate	10605-21-7	Apple	Malus pumila Mill.	India	Fruit	I	F	3.9	3.9	3.9	Sharma I.D.; Nath A. Persistence of different pesticides in apple. ISHS Acta Horticulturae, 2005, 696, 437-440.
116	Carbendazim	methyl 1H-benzimidazol-2-ylcarbamate	10605-21-7	Apple	Malus pumila Mill.	Finland	Leaves	O	U	2.2	2.2	2.2	Liesivuori J.; Liukkonen S.; Pirhonen P. Reentry intervals after pesticide application in greenhouses. Scandinavian Journal of Work, Environment & Health, 1988, 14(suppl 1), 35-36.
116	Carbendazim	methyl 1H-benzimidazol-2-ylcarbamate	10605-21-7	Chrysanthemum	Chrysanthemum morifolium	China	Buds	I	F	3.9	4.05	3.98	Zhao J.; Cui X.; Wu J.; Wen Y. Residue and decline dynamics of carbendazim in chrysanthemum flower and soil. Chinese Journal of Pesticide Science, 2013, 4, 020
116	Carbendazim	methyl 1H-benzimidazol-2-ylcarbamate	10605-21-7	Chrysanthemum	Chrysanthemum morifolium	China	Flowers	I	F	3.31	3.45	3.38	Zhao J.; Cui X.; Wu J.; Wen Y. Residue and decline dynamics of carbendazim in chrysanthemum flower and soil. Chinese Journal of Pesticide Science, 2013, 4, 020
116	Carbendazim	methyl 1H-benzimidazol-2-ylcarbamate	10605-21-7	Creeping bentgrass	Agrostis palustris Huds	Canada	Thatch	I	F	17.5	17.5	17.5	Liu L. X.; Hsiang T. Estimating benzimidazole residues in thatch and turfgrass by bioassay. Pesticide Science, 1996, 46(2), 139-143.
116	Carbendazim	methyl 1H-benzimidazol-2-ylcarbamate	10605-21-7	Crown daisy (summer)	Glebionis coronaria	China	Leaves	I	F	2.7	3.3	3	Fan S.; Zhang F.; Deng K.; Yu C.; Liu S.; Zhao P.; Pan C. Spinach or amaranth contains highest residue of metalaxyl, fluazifop-p-butyl, chlorpyrifos, and lambda-cyhalothrin on six leaf vegetables upon open field application. Journal of Agricultural and Food Chemistry, 2013, 61(9), 2039-2044
116	Carbendazim	methyl 1H-benzimidazol-2-ylcarbamate	10605-21-7	Crown daisy (autumn)	Glebionis coronaria	China	Leaves	I	F	7.4	23.7	15.55	Fan S.; Zhang F.; Deng K.; Yu C.; Liu S.; Zhao P.; Pan C. Spinach or amaranth contains highest residue of metalaxyl, fluazifop-p-butyl, chlorpyrifos, and lambda-cyhalothrin on six leaf vegetables upon open field application. Journal of Agricultural and Food Chemistry, 2013, 61(9), 2039-2044
116	Carbendazim	methyl 1H-benzimidazol-2-ylcarbamate	10605-21-7	Eggplant	Solanum melongena	India	Fruit	I	F	4.59	5.03	4.81	Mousa M.; Sagar V.R.; Gajbhiye V.T.; Kumar R. Pesticides persistence in/on fresh and dehydrated brinjal. Journal of Food Science and Technology, 2004, 41(4), 429-431.
116	Carbendazim	methyl 1H-benzimidazol-2-ylcarbamate	10605-21-7	Ginseng	Panax notoginseng	China	Root	I	F	3.29	3.39	3.34	Wu J.; Wei H.; Sui X.; Lin J.; Wang T.; Fen G.; Xue J. Dynamics of Carbendazim Residue in Panax notoginseng and Soil. Bulletin of Environmental Contamination and Toxicology, 2010, 84(4), 469-472.
116	Carbendazim	methyl 1H-benzimidazol-2-ylcarbamate	10605-21-7	Ginseng	Panax notoginseng	China	Leaves	I	F	6.71	6.77	6.74	Wu J.; Wei H.; Sui X.; Lin J.; Wang T.; Fen G.; Xue J. Dynamics of Carbendazim Residue in Panax notoginseng and Soil. Bulletin of Environmental Contamination and Toxicology, 2010, 84(4), 469-472.
116	Carbendazim	methyl 1H-benzimidazol-2-ylcarbamate	10605-21-7	Grape	Vitis vinifera var. Anab-E-Sahi	India	Fruit	I	F	5	5	5	Mohapatra S.; Awasthi M.D.; Ahuja A.K.; Sharma D. Persistence and Dissipation of Carbendazim Residue in/on Grape Berries. Pesticide Research Journal, 1998, 10(1), 95-97.
116	Carbendazim	methyl 1H-benzimidazol-2-ylcarbamate	10605-21-7	Grape	Vitis vinifera L. var. Thompson seedless	India	Fruit	I	F	4.6	7.3	5.95	Banerjee K. Residue dynamics of carbendazim and mancozeb in grape (Vitis Vinifera L.) berries. Toxicological and Environmental Chemistry, 2005, 87(1), 77-81.
116	Carbendazim	methyl 1H-benzimidazol-2-ylcarbamate	10605-21-7	Lettuce	Lactuca sativa		Leaves	O	U	9	9	9	Goedicke H.J. Exposition durch Rückstände auf Planzenoberflächen nach Anwendung von Pflanzenschutsmittelen im Gewächshaus. [Exposure from foliar residues after use of pesticides in greenhouses], Zeitschrift fur die Gesamte Hygiene und Ihre Grenzgebiete, 1989, 35, 531-533.
116	Carbendazim	methyl 1H-benzimidazol-2-ylcarbamate	10605-21-7	Lettuce (summer)	Lactuca sativa	China	Leaves	I	F	1.7	2.6	2.15	Fan S.; Deng K.; Yu C.; Zhao P.; Bai A.; Li Y.; Pan C; Li X. Influence of different planting seasons of six leaf vegetables on residues of five pesticides. Journal of Agricultural and Food Chemistry, 2013, 61(38), 9036-9044
116	Carbendazim	methyl 1H-benzimidazol-2-ylcarbamate	10605-21-7	Lettuce (autumn)	Lactuca sativa	China	Leaves	I	F	2.7	4.3	3.5	Fan S.; Deng K.; Yu C.; Zhao P.; Bai A.; Li Y.; Pan C; Li X. Influence of different planting seasons of six leaf vegetables on residues of five pesticides. Journal of Agricultural and Food Chemistry, 2013, 61(38), 9036-9044
116	Carbendazim	methyl 1H-benzimidazol-2-ylcarbamate	10605-21-7	Mango	Mangifera indica	India	Fruit	I	F	6.5	7	6.75	Bhattacherjee A.K.; Pandey B.K.; Prakash O. Persistence and dissipation of carbendazim residues in mango fruits after pre- and post-harvest applications. Journal of Food Science and Technology, 2009, 46(4), 347-349.
116	Carbendazim	methyl 1H-benzimidazol-2-ylcarbamate	10605-21-7	Mango	Mangifera indica	India	Fruit	I	X (post harvest)	19	40	29.5	Awasthi M.D.; Sharma D. Uptake of Fungicides from Post-harvest treatment and their Persistence in Ripening Mango Fruits. Pesticide Research Journal, 1997, 9(1), 41-45.
116	Carbendazim	methyl 1H-benzimidazol-2-ylcarbamate	10605-21-7	Mango	Mangifera indica	India	Fruit	I	F	1	5	3	Devi P. A.; Paramasivam M.; Prakasam V. Degradation pattern and risk assessment of carbendazim and mancozeb in mango fruits. Environmental Monitoring and Assessment, 2015, 187(1), 4142.
116	Carbendazim	methyl 1H-benzimidazol-2-ylcarbamate	10605-21-7	Oilseed rape (summer)	Brassica napus	China	Leaves	I	F	3.4	4.3	3.85	Fan S.; Deng K.; Yu C.; Zhao P.; Bai A.; Li Y.; Pan C; Li X. Influence of different planting seasons of six leaf vegetables on residues of five pesticides. Journal of Agricultural and Food Chemistry, 2013, 61(38), 9036-9044
116	Carbendazim	methyl 1H-benzimidazol-2-ylcarbamate	10605-21-7	Oilseed rape (autumn)	Brassica napus	China	Leaves	I	F	4.3	5.8	5.05	Fan S.; Deng K.; Yu C.; Zhao P.; Bai A.; Li Y.; Pan C; Li X. Influence of different planting seasons of six leaf vegetables on residues of five pesticides. Journal of Agricultural and Food Chemistry, 2013, 61(38), 9036-9044
116	Carbendazim	methyl 1H-benzimidazol-2-ylcarbamate	10605-21-7	Oilseed rape	Brassica napus	*	Whole plant	I	F	32	32	32	You Z.-H.; Chen Z.-D.; Liu X.-C.; Xue A.-F.; Li S.-Q.; Chen H. Carbendazim residue detection and dissipation dynamics in rapeseed plants and soil. Agrochemicals, 2006, 45(8), 552-553.
116	Carbendazim	methyl 1H-benzimidazol-2-ylcarbamate	10605-21-7	Ophiopogon	Ophiopogon japonicus Thunb.	*	Root	I	F	2.01	3.6	2.81	Wei H.-D.; Lin J.; Wang T.-Y.; Wu J.-l. Residue Decline Dynamics of Carbendazim in Radix Ophiopogonis and Soil. Chinese Journal of Pesticide Science, 2009, 11(4), 467-471.
116	Carbendazim	methyl 1H-benzimidazol-2-ylcarbamate	10605-21-7	Ophiopogon	Ophiopogon japonicus Thunb.	*	Leaves	I	F	3.6	5.35	4.48	Wei H.-D.; Lin J.; Wang T.-Y.; Wu J.-l. Residue Decline Dynamics of Carbendazim in Radix Ophiopogonis and Soil. Chinese Journal of Pesticide Science, 2009, 11(4), 467-471.
116	Carbendazim	methyl 1H-benzimidazol-2-ylcarbamate	10605-21-7	Pakchoi (summer)	Brassica rapa subsp. chinensis	China	Leaves	I	F	3.5	4.2	3.85	Fan S.; Deng K.; Yu C.; Zhao P.; Bai A.; Li Y.; Pan C; Li X. Influence of different planting seasons of six leaf vegetables on residues of five pesticides. Journal of Agricultural and Food Chemistry, 2013, 61(38), 9036-9044
116	Carbendazim	methyl 1H-benzimidazol-2-ylcarbamate	10605-21-7	Pakchoi (autumn)	Brassica rapa subsp. chinensis	China	Leaves	I	F	4.3	7	5.65	Fan S.; Deng K.; Yu C.; Zhao P.; Bai A.; Li Y.; Pan C; Li X. Influence of different planting seasons of six leaf vegetables on residues of five pesticides. Journal of Agricultural and Food Chemistry, 2013, 61(38), 9036-9044
116	Carbendazim	methyl 1H-benzimidazol-2-ylcarbamate	10605-21-7	Peach	Prunus persica	Brazil	Fruit	I	F	15.5	15.5	15.5	Minelli E.V.; Angioni A.; Cabras P.; Garau V.L.; Melis M.; Pirisi F.M.; Cabitza F.; Cubeddu M. Persistence of some pesticides in peach fruit. Italian Journal of Food Science, 1996, 8(1), 57-62.
116	Carbendazim	methyl 1H-benzimidazol-2-ylcarbamate	10605-21-7	Pomegranate	Punica granatum L. cv. Bhagwa	India	Fruit	I	F	2	3.25	2.75	Utture S.C.; Banerjee K.; Dasgupta S.; Patil S.H.; Jadhav M.R.; Wagh S.S.; ... Adsule P.G. Dissipation and distribution behavior of azoxystrobin, carbendazim, and difenoconazole in pomegranate fruits. Journal of Agricultural and Food Chemistry, 2011, 59(14), 7866-7873.
116	Carbendazim	methyl 1H-benzimidazol-2-ylcarbamate	10605-21-7	Pomegranate	Punica granatum	India	Fruit	I	F	17.3	22.8	20.05	Mohapatra, S.; Lekha, S. Residue level and dissipation of carbendazim in/on pomegranate fruits and soil. Environmental Monitoring and Assessment, 2016, 188(7), 1-10.
116	Carbendazim	methyl 1H-benzimidazol-2-ylcarbamate	10605-21-7	Soybean	Glycine max	China	Whole plant	I	F	18.3	21.6	19.95	Zhang H.; Wang Y.; Lu Z.-B. The residue dynamic of carbendazim 40% SC in soybean and soil. Pesticides, 2006, 45(10), 695-696.
116	Carbendazim	methyl 1H-benzimidazol-2-ylcarbamate	10605-21-7	Spinach (summer)	Spinacia oleracea	China	Leaves	I	F	2.9	3.2	3.05	Fan S.; Deng K.; Yu C.; Zhao P.; Bai A.; Li Y.; Pan C; Li X. Influence of different planting seasons of six leaf vegetables on residues of five pesticides. Journal of Agricultural and Food Chemistry, 2013, 61(38), 9036-9044
116	Carbendazim	methyl 1H-benzimidazol-2-ylcarbamate	10605-21-7	Spinach (autumn)	Spinacia oleracea	China	Leaves	I	F	4.9	8.6	7.6	Fan S.; Deng K.; Yu C.; Zhao P.; Bai A.; Li Y.; Pan C; Li X. Influence of different planting seasons of six leaf vegetables on residues of five pesticides. Journal of Agricultural and Food Chemistry, 2013, 61(38), 9036-9044
118	Carbofuran	2,3-dihydro-2,2-dimethyl-7-benzofuranyl methylcarbamate	1563-66-2	Alfalfa	Medicago sativa	MA, USA	Leaves	O	F	1.9	1.9	1.9	Shaw F.R.; Miller D.; Miller M.C.; Yadava C.P.S. Persistence of Carbofuran and of 3-Hydroxycarbofuran on Alfalfa. Journal of Economic Entomology, 1969, 62(4), 953-953.
118	Carbofuran	2,3-dihydro-2,2-dimethyl-7-benzofuranyl methylcarbamate	1563-66-2	Chickpea	Cicer arietinum L. cv. Pusa 362	India	Fruit	I	F	11	12.1	11.55	Meher H.C.; Gajbhiye V.T.; Singh G.; Kamra A.; Chawla G. Persistence and Nematicidal Efficacy of Carbosulfan, Cadusafos, Phorate, and Triazophos in Soil and Uptake by Chickpea and Tomato Crops under Tropical Conditions. Journal of Agricultural and Food Chemistry, 2010, 58(3), 1815-1822.
118	Carbofuran	2,3-dihydro-2,2-dimethyl-7-benzofuranyl methylcarbamate	1563-66-2	Chinese cabbage	Brassica rapa subsp. pekinensis	India	Leaves	I	F	2.5	2.5	2.5	Ripley B.D.; Ritcey G.M.; Harris C.R.; Denommé M.A.; Lissemore L.I.. Comparative Persistence of Pesticides on Selected Cultivars of Specialty Vegetables. Journal of Agricultural and Food Chemistry, 2003, 51(5), 1328-1335.
118	Carbofuran	2,3-dihydro-2,2-dimethyl-7-benzofuranyl methylcarbamate	1563-66-2	Cotton	Gossypium hirsutum L.	AZ, USA	Leaves	O	F	1.1	1.1	1.1	Ware G.W.; Estesen B.; Cahill W.P. Dislodgable insecticide residues on cotton. Bulletin of Environmental Contamination and Toxicology, 1975, 14(5), 606-609
118	Carbofuran	2,3-dihydro-2,2-dimethyl-7-benzofuranyl methylcarbamate	1563-66-2	Grapefruit	Citrus × paradisi	CA, USA	Leaves	O	F	4.6	7.4	6	Iwata Y.; Knaak J.B.; Dusch M.E.; O'Neal J.R.; Pappas J.L. Worker reentry research for carbosulfan applied to California citrus trees. Journal of Agricultural and Food Chemistry, 1983, 31(6), 1131-1136.
118	Carbofuran	2,3-dihydro-2,2-dimethyl-7-benzofuranyl methylcarbamate	1563-66-2	Lemon	Citrus x limon	CA, USA	Leaves	O	F	7.4	8.8	8.1	Iwata Y.; Knaak J.B.; Dusch M.E.; O'Neal J.R.; Pappas J.L. Worker reentry research for carbosulfan applied to California citrus trees. Journal of Agricultural and Food Chemistry, 1983, 31(6), 1131-1136.
118	Carbofuran	2,3-dihydro-2,2-dimethyl-7-benzofuranyl methylcarbamate	1563-66-2	Onion	Allium cepa L.	India	Bulb	I	F	4.5	4.5	4.5	Srinivas S.P.; Banerjee K.; Jadhav M.R.; Ghaste M.S.; Lawande K.E. Bioefficacy, dissipation kinetics and safety evaluation of selected insecticides in Allium cepa L. Journal of Environmental Science and Health, 2012, 47(7), 700-709.
118	Carbofuran	2,3-dihydro-2,2-dimethyl-7-benzofuranyl methylcarbamate	1563-66-2	Orange	Citrus x sinensis	CA, USA	Leaves	O	F	10	13	11.5	Iwata Y.; Knaak J.B.; Dusch M.E.; O'Neal J.R.; Pappas J.L. Worker reentry research for carbosulfan applied to California citrus trees. Journal of Agricultural and Food Chemistry, 1983, 31(6), 1131-1136.
118	Carbofuran	2,3-dihydro-2,2-dimethyl-7-benzofuranyl methylcarbamate	1563-66-2	Orange	Citrus x sinensis	FL, USA	Leaves	O	F	3.2	3.7	3.45	Nigg H.N.; Stamper J.H.; Knaak J.B. Leaf, fruit and soil surface residues of carbosulfan and its metabolites in Florida citrus groves. Journal of Agricultural and Food Chemistry, 1984, 32(1), 80-85.
118	Carbofuran	2,3-dihydro-2,2-dimethyl-7-benzofuranyl methylcarbamate	1563-66-2	Strawberry	Fragaria x ananassa vars. Day-neutral, Tioga & Tufts	CA, USA	Fruit	I	F	1.39	3.21	2.3	Archer T.E.; Stokes J.D.; Bringhurst R.S. Fate of carbofuran and its metabolites on strawberries in the environment. Journal of Agricultural and Food Chemistry, 1977, 25(3), 536-541. Calculated.
118	Carbofuran	2,3-dihydro-2,2-dimethyl-7-benzofuranyl methylcarbamate	1563-66-2	Tea	Camellia sinensis cv. Ooolong	Taiwan	Leaves	O	F	1.65	2.35	2	Wu C.-C.; Chu C.; Wang Y.-S.; Lur H.-S. Dissipation of carbofuran and carbaryl on Oolong tea during tea bushes, manufacturing and roasting processes. Journal of Environmental Science and Health, 2007, 42(6), 669-675.
118	Carbofuran	2,3-dihydro-2,2-dimethyl-7-benzofuranyl methylcarbamate	1563-66-2	Tobacco	Nicotiana tobacum L. var. Hicks	USA	Leaves (young)	I	F	4	4	4	Ashworth R.J.; Sheets T.J. Metabolism of carbofuran in tobacco. Journal of Agricultural and Food Chemistry, 1972, 20(2), 407-412.
118	Carbofuran	2,3-dihydro-2,2-dimethyl-7-benzofuranyl methylcarbamate	1563-66-2	Tomato	Lycopersicon esculentum Mill.	India	Fruit	I	F	10	10	10	Mohapatra S.; Awasthi M.D.; Sharma D. Effect of Combination Treatment of Carbofuran and Metalaxyl on their Residue Persistence in Soil and Tomato fruit. Pesticide Research Journal, 1998, 10(1), 49-53.
118	Carbofuran	2,3-dihydro-2,2-dimethyl-7-benzofuranyl methylcarbamate	1563-66-2	Tomato	Lycopersicon esculentum Mill. cv. Pusa Ruby	India	Fruit	I	F	11.9	13.1	12.5	Meher H.C.; Gajbhiye V.T.; Singh G.; Kamra A.; Chawla G. Persistence and Nematicidal Efficacy of Carbosulfan, Cadusafos, Phorate, and Triazophos in Soil and Uptake by Chickpea and Tomato Crops under Tropical Conditions. Journal of Agricultural and Food Chemistry, 2010, 58(3), 1815-1822.
120	Carbophenothion	S-(((4-chlorophenyl)thio)methyl) O,O-diethyl phosphorodithioate	786-19-6	Lemon	Citrus x limon	CA, USA	Fruit	I	F	6	13	9.5	Gunther F.A.; Carman G.E.; Jeppson L.R.; Barkley J.H.; Blinn R.C.; Patchett G.G. Pesticide residues, residual behavior of S-(p-chlorophenylthio) methyl O, O-diethyl phosphorodithioate (trithion) on and in mature lemons and oranges. Journal of Agricultural and Food Chemistry, 1959, 7(1), 28-30.
120	Carbophenothion	S-(((4-chlorophenyl)thio)methyl) O,O-diethyl phosphorodithioate	786-19-6	Orange	Citrus x sinensis cv. Washington Navel	CA, USA	Fruit	I	F	16	21	18.5	Gunther F.A.; Carman G.E.; Jeppson L.R.; Barkley J.H.; Blinn R.C.; Patchett G.G. Pesticide residues, residual behavior of S-(p-chlorophenylthio) methyl O, O-diethyl phosphorodithioate (trithion) on and in mature lemons and oranges. Journal of Agricultural and Food Chemistry, 1959, 7(1), 28-30.
120	Carbophenothion	S-(((4-chlorophenyl)thio)methyl) O,O-diethyl phosphorodithioate	786-19-6	Orange	Citrus x sinensis	FL, USA	Leaves	O	F	1.8	7	4.6	Willis G.H.; McDowell L.L. Pesticide persistence on foliage. Reviews of Environmental Contamination and Toxicology, 1987, 100, 23-73.
120	Carbophenothion	S-(((4-chlorophenyl)thio)methyl) O,O-diethyl phosphorodithioate	786-19-6	Orange	Citrus x sinensis	Florida, USA	Leaves	O	F	2.94	6.03	4.49	Thompson N.P.; Brooks R.F. Disappearance of dislodgable residues of five organophosphate pesticides on citrus leaves and fruit during dry and wet weather in Florida. Archives of Environmental Contamination and Toxicology, 1977, 5(1), 55-61. Calculated.
120	Carbophenothion	S-(((4-chlorophenyl)thio)methyl) O,O-diethyl phosphorodithioate	786-19-6	Orange	Citrus x sinensis	Florida, USA	Leaves	I	F	3.1	7	5.05	de Batista G.C.; Stamper J.H.; Nigg H.N.; Knapp J.L. Dislodgeable residues of carbophenothion in Florida citrus: Implications for safe worker reentry. Bulletin of Environmental Contamination and Toxicology, 1985, 35(1), 213-221.
121	Carbosulfan	2,3-dihydro-2,2-dimethyl-7-benzofuranyl [(dibutylamino)thio]methylcarbamate	55285-14-8	Eggplant	Solanum melongena	India	Fruit	I	F	1.8	1.8	1.8	Gupta S.; Sharma R.K.; Sinha S.R.; Gupta R.K.; Gajbhiye V.T. Persistence of Some New Insecticides in Brinjal and their Efficacy against Brinjal Leafhopper and Borer. Pesticide Research Journal, 2007, 19(2), 205-209.
121	Carbosulfan	2,3-dihydro-2,2-dimethyl-7-benzofuranyl [(dibutylamino)thio]methylcarbamate	55285-14-8	Grapefruit	Citrus × paradisi	CA, USA	Leaves	O	F	3	3.4	3.2	Iwata Y.; Knaak J.B.; Dusch M.E.; O'Neal J.R.; Pappas J.L. Worker reentry research for carbosulfan applied to California citrus trees. Journal of Agricultural and Food Chemistry, 1983, 31(6), 1131-1136.
121	Carbosulfan	2,3-dihydro-2,2-dimethyl-7-benzofuranyl [(dibutylamino)thio]methylcarbamate	55285-14-8	Lemon	Citrus x limon	CA, USA	Leaves	O	F	3.3	4.2	3.75	Iwata Y.; Knaak J.B.; Dusch M.E.; O'Neal J.R.; Pappas J.L. Worker reentry research for carbosulfan applied to California citrus trees. Journal of Agricultural and Food Chemistry, 1983, 31(6), 1131-1136.
121	Carbosulfan	2,3-dihydro-2,2-dimethyl-7-benzofuranyl [(dibutylamino)thio]methylcarbamate	55285-14-8	Orange	Citrus x sinensis	CA, USA	Leaves	O	F	1.7	4.4	3.05	Iwata Y.; Knaak J.B.; Dusch M.E.; O'Neal J.R.; Pappas J.L. Worker reentry research for carbosulfan applied to California citrus trees. Journal of Agricultural and Food Chemistry, 1983, 31(6), 1131-1136.
121	Carbosulfan	2,3-dihydro-2,2-dimethyl-7-benzofuranyl [(dibutylamino)thio]methylcarbamate	55285-14-8	Orange	Citrus x sinensis cv. Valencia	Florida, USA	Leaves	O	F	1.8	4.2	3	Nigg H.N.; Stamper J.H.; Knaak J.B. Leaf, fruit and soil surface residues of carbosulfan and its metabolites in Florida Citrus groves. Journal of Agricultural and Food Chemistry, 1984, 32(1), 80-85.
121	Carbosulfan	2,3-dihydro-2,2-dimethyl-7-benzofuranyl [(dibutylamino)thio]methylcarbamate	55285-14-8	Orange	Citrus x sinensis cv. valencia	CA, USA	Leaves	O	F	4	4	4	Clay, V. E., & Fukuto, T. R. (1984). Metabolism of carbosulfan in Valencia orange tree leaves and fruit. Archives of environmental contamination and toxicology, 13(1), 53-62.
121	Carbosulfan	2,3-dihydro-2,2-dimethyl-7-benzofuranyl [(dibutylamino)thio]methylcarbamate	55285-14-8	Orange	Citrus x sinensis cv. Valencia	*	Fruit	I	F	4	4	4	Soler C.; Hamilton B.; Furey A.; James K.J.; Manes J.; Picó Y. Liquid Chromatography Quadrupole Time-of-Flight Mass Spectrometry Analysis of Carbosulfan, Carbofuran, 3-Hydroxycarbofuran, and Other Metabolites in Food. Analytical Chemistry, 2007, 79(4), 1492-1501
121	Carbosulfan	2,3-dihydro-2,2-dimethyl-7-benzofuranyl [(dibutylamino)thio]methylcarbamate	55285-14-8	Peach	Prunus persica	Spain	Fruit	I	F	7.4	9.53	4.87	Barba A.; Navarro García S.; Cámara M.A.; Molina R.; Buendia J. Disappearance of carbosulfan residues in peaches. Pesticide Science, 1995, 43(4), 317-320.
121	Carbosulfan	2,3-dihydro-2,2-dimethyl-7-benzofuranyl [(dibutylamino)thio]methylcarbamate	55285-14-8	Potato	Solanum tuberosum	Egypt	Leaves	O	F	2.86	2.86	2.86	Abd El-Aleem A.H.; Abu-Zahw M.M.; Abd-Allah O.I. Persistence and biochemical influence of carbosulfan and carbofuran on solanum tuberosum tubers under the egyptian environmental conditions. Egyptian Journal of Chemistry, 2009, 52(2), 217-231.
3030	Carfentrazone	alpha,2-dichloro-5-(4-(difluoromethyl)-4,5-dihydro-3-methyl-5-oxo-1H-1,2,4-triazol-1-yl)-4-fluorobenzenepropanoic acid	128621-72-7	Tall fescue grass	Festuca arundinacea Schreb.	USA	Blades	O	F	14.4	14.4	14.4	John C.V. Determining Pesticide Dislodgeable Foliar Residues and Their Persistence Following Application to Tall Fescue Lawn Turf. PhD Thesis and associated publication, 2007.
123	Carfentrazone ethyl	ethyl alpha,2-dichloro-5-(4-(difluoromethyl)-4,5-dihydro-3-methyl-5-oxo-1H-1,2,4-triazol-1-yl)-4-fluorobenzenepropanoate	128639-02-1	Rice	Oryza sativa	China	Leaves	I	F	5.2	5.7	5.45	Guo Y.-Z.; Zhang Y.-T.; Liu L.; Shao H.; Li H.; Li N. Residues Dynamics of Carfentrazone-ethyl in Rice. Agrochemicals, 2010, 49(10), 755-756.
124	Cartap	S,S'-(2-(dimethylamino)-1,3-propanediyl) dicarbamothioate	15263-53-3	Apple	Malus pumila Mill.	China	Fruit	O	F	2	3	2.5	Huang Y.C.; Huang S.Z. Residual Dynamics of cartap on apple and soil. Journal of Agro-Environment Science, 2003, 22(1), 113-115.
124	Cartap	S,S'-(2-(dimethylamino)-1,3-propanediyl) dicarbamothioate	15263-53-3	Cabbage	Brassica oleracea capitata	China	Leaves	I	F	2.8	2.8	2.8	Yingming X.; Junxin L.I.; Dai Xiaohua H.Y.; Guohong S. Residual Dynamics of Cartap in Cabbage and Soil. Modern Scientific Instruments, 2003, 1, 012.
124	Cartap	S,S'-(2-(dimethylamino)-1,3-propanediyl) dicarbamothioate	15263-53-3	Eggplant	Solanum melongena	India	Fruit	I	F	2	2	2	Rao S.V C.S.; Swarupa S.; Ravindranth D.; Reddy A.H. Dissipation of cartap hydrochloride in brinjal (Solanum melongena). Journal of Multidisciplinary Engineering Science and Technology, 2014, 1(5), 79-81
127	Chinomethionat	6-methyl-1,3-dithiolo[4,5-b]quinoxalin-2-one	219-455-3	Strawberry	Fragaria x ananassa cv. Korona	Norway	Fruit	I	U	3.67	4.36	4.02	Stensvand A.; Christiansen A. Investigation on Fungicide Residues in Greenhouse-Grown Strawberries. Journal of Agricultural and Food Chemistry, 2000, 48(3), 917-920. Calculated.
1138	Chlorantraniliprole	3-bromo-N-[4-chloro-2-methyl-6-[(methylamino)carbonyl]phenyl]-1-(3-chloro-2-pyridinyl)-1H-pyrazole-5-carboxamide	500008-45-7	Cauliflower	Brassica oleracea botrytis var. Giant Snowball	India	Curd	O	F	1.25	1.36	1.31	Kar A.; Mandal K.; Singh B. Environmental fate of chlorantraniliprole residues on cauliflower using QuEChERS technique. Environmental Monitoring and Assessment, 2013, 185(2), 1255-1263.
1138	Chlorantraniliprole	3-bromo-N-[4-chloro-2-methyl-6-[(methylamino)carbonyl]phenyl]-1-(3-chloro-2-pyridinyl)-1H-pyrazole-5-carboxamide	500008-45-7	Cucumber	Cucumis sativus	China	Fruit	I	F	2.2	2.2	2.2	Dong F.; Liu X.; Xu J.; Li J.; Li Y.; Shan W.; Song W.; Zheng Y. Determination of cyantraniliprole and its major metabolite residues in vegetable and soil using ultra-performance liquid chromatography/tandem mass spectrometry. Biomedical Chromatography, 2012, 26(3), 377-383.
1138	Chlorantraniliprole	3-bromo-N-[4-chloro-2-methyl-6-[(methylamino)carbonyl]phenyl]-1-(3-chloro-2-pyridinyl)-1H-pyrazole-5-carboxamide	500008-45-7	Maize	Zea mays L.	China	Straw	I	F	4.9	5.4	5.15	Dong F.; Liu X.; Xu J.; Li J.; Li Y.; Shan W.; Song W.; Zheng Y. Determination of cyantraniliprole and its major metabolite residues in vegetable and soil using ultra-performance liquid chromatography/tandem mass spectrometry. Biomedical Chromatography, 2012, 26(3), 377-383.
1138	Chlorantraniliprole	3-bromo-N-[4-chloro-2-methyl-6-[(methylamino)carbonyl]phenyl]-1-(3-chloro-2-pyridinyl)-1H-pyrazole-5-carboxamide	500008-45-7	Maize	Zea mays L.	China	Straw	I	F	9	10.8	9.9	He M.; Song D.; Jia H.C.; Zheng Y. Concentration and dissipation of chlorantraniliprole and thiamethoxam residues in maize straw, maize, and soil. Journal of Environmental Science and Health, Part B, 2016, 51(9), 594-601.
1138	Chlorantraniliprole	3-bromo-N-[4-chloro-2-methyl-6-[(methylamino)carbonyl]phenyl]-1-(3-chloro-2-pyridinyl)-1H-pyrazole-5-carboxamide	500008-45-7	Rice	Oryza sativa	China	Straw	I	F	3.5	3.5	3.5	Zhang J.-M.; Chai W.-G.; Wu Y.-L. Residues of chlorantraniliprole in rice field ecosystem. Chemosphere , 2012, 87(2), 132-136.
1138	Chlorantraniliprole	3-bromo-N-[4-chloro-2-methyl-6-[(methylamino)carbonyl]phenyl]-1-(3-chloro-2-pyridinyl)-1H-pyrazole-5-carboxamide	500008-45-7	Tomato	Lycopersicon esculentum Mill.	Egypt	Fruit	I	F	3.3	3.3	3.3	Malhat F.; Abdallah H.; Hegazy I. Dissipation of Chlorantraniliprole in Tomato Fruits and Soil. Bulletin of Environmental Contamination and Toxicology, 2012, 88(3), 349-351.
1138	Chlorantraniliprole	3-bromo-N-[4-chloro-2-methyl-6-[(methylamino)carbonyl]phenyl]-1-(3-chloro-2-pyridinyl)-1H-pyrazole-5-carboxamide	500008-45-7	Tomato	Lycopersicon esculentum Mill.	China	Fruit	I	F	2.8	2.8	2.8	Dong F.; Liu X.; Xu J.; Li J.; Li Y.; Shan W.; Song W.; Zheng Y. Determination of cyantraniliprole and its major metabolite residues in vegetable and soil using ultra-performance liquid chromatography/tandem mass spectrometry. Biomedical Chromatography, 2012, 26(3), 377-383.
134	Chlordane	1,2,4,5,6,7,8,8-octachloro-2,3,3a,4,7,7a-hexahydro-4,7-methano-1H-indene	57-74-9	Alfalfa	Medicago sativa	*	Leaves	I	F	9	9	9	Dahm P.A. Effects of weathering and commercial dehydration upon residues of aldrin, chlordane, and toxaphene applied to alfalfa. Journal of Economic Entomology, 1952, 45(5), 763-766.
134	Chlordane	1,2,4,5,6,7,8,8-octachloro-2,3,3a,4,7,7a-hexahydro-4,7-methano-1H-indene	57-74-9	Annual bluegrass	Poa annua L.	Canada	Thatch	I	F	76.2	76.2	76.2	Sears M.K.; Chapman R.A. Persistence and movement of four insecticides applied to turfgrass. Journal of Economic Entomology, 1979, 72(2), 272-274.
134	Chlordane	1,2,4,5,6,7,8,8-octachloro-2,3,3a,4,7,7a-hexahydro-4,7-methano-1H-indene	57-74-9	Kale	Brassica oleracea var. Sabellica	MD, USA	Leaves	I	F	2.3	2.3	2.3	Willis G.H.; McDowell L.L. Pesticide persistence on foliage. Reviews of Environmental Contamination and Toxicology, 1987, 100, 23-73.
134	Chlordane	1,2,4,5,6,7,8,8-octachloro-2,3,3a,4,7,7a-hexahydro-4,7-methano-1H-indene	57-74-9	Lemon	Citrus x limon	CA, USA	Peel	I	F	19	19	19	Blinn R.C.; Carman G.E.; Ewart W.H.; Gunther F.A. Residual Behavior of Various Insecticides on and in Lemons and Oranges. Journal of Economic Entomology, 1959, 52(1), 42-44.
1229	Chlordimeform	N'-(4-chloro-2-methylphenyl)-N,N-dimethylmethanimidamide	6164-98-3	Cotton	Gossypium hirsutum L.	AZ, USA	Leaves	O	F	0.7	1.2	0.95	Willis G.H.; McDowell L.L. Pesticide persistence on foliage. Reviews of Environmental Contamination and Toxicology, 1987, 100, 23-73.
1229	Chlordimeform	N'-(4-chloro-2-methylphenyl)-N,N-dimethylmethanimidamide	6164-98-3	Cotton	Gossypium hirsutum L.	TX, USA	Leaves	O	F	0.1	0.1	0.1	Wolfenbarger D.A.; Gomes E.D.; Robinson S H.; Parks L.H. Chlordimeform residues from cotton leaves. Journal of Economic Entomology, 1979, 72(1), 128-130.
1229	Chlordimeform	N'-(4-chloro-2-methylphenyl)-N,N-dimethylmethanimidamide	6164-98-3	Cotton	Gossypium hirsutum L.	TX, USA	Leaves	O	F	0.1	0.1	0.1	Bull D.L. Metabolism of chlordimeform in cotton plants. Environmental Entomology, 1973, 2(5), 869-872.
1229	Chlordimeform	N'-(4-chloro-2-methylphenyl)-N,N-dimethylmethanimidamide	6164-98-3	Tea	Camellia sinensis	China	Leaves	I	F	3.6	3.6	3.6	Zongmao C.; Haibin W. Factors affecting residues of pesticides in tea. Pesticide Science, 1988, 23(2), 109-118.
136	Chlorfenapyr	4-bromo-2-(4-chlorophenyl)-1-(ethoxymethyl)-5-(trifluoromethyl)-1H-pyrrole-3-carbonitrile	122453-73-0	Cabbage	Brassica oleracea capitata	*	Leaves	I	F	2.2	2.6	2.4	Cao Y.; Chen J.; Wang Y.; Liang J.; Chen L.; Lu Y. HPLC/UV analysis of chlorfenapyr residues in cabbage and soil to study the dynamics of different formulations. Science of the Total Environment, 2005, 350(1-3), 38-46.
136	Chlorfenapyr	4-bromo-2-(4-chlorophenyl)-1-(ethoxymethyl)-5-(trifluoromethyl)-1H-pyrrole-3-carbonitrile	122453-73-0	Cabbage	Brassica oleracea capitata	India	Leaves	I	F	2.93	3.62	3.28	Ditya P.; Das S.P.; Sarkar P.K.; Bhattacharyya A. Degradation Dynamics of Chlorfenapyr Residue in Chili, Cabbage and Soil. Bulletin of Environmental Contamination and Toxicology, 2010, 84(5), 602-605.
136	Chlorfenapyr	4-bromo-2-(4-chlorophenyl)-1-(ethoxymethyl)-5-(trifluoromethyl)-1H-pyrrole-3-carbonitrile	122453-73-0	Eggplant	Solanum melongena	China	Fruit	I	F	3.5	3.8	3.6	Shi K.; Li L.; Yuan L.; Li, W.; Liu, F. Residues and risk assessment of bifenthrin and chlorfenapyr in eggplant and soil under open ecosystem conditions. International Journal of Environmental Analytical Chemistry, 2016, 96(2), 173-184.
136	Chlorfenapyr	4-bromo-2-(4-chlorophenyl)-1-(ethoxymethyl)-5-(trifluoromethyl)-1H-pyrrole-3-carbonitrile	122453-73-0	Lettuce	Lactuca sativa L. cv. Lolla Rosa	Republic of Korea	Leaves	I	U	6.3	6.3	6.3	Hwang J-I.; Lee S-E.; Kim J-E.; Comparison of theoretical and experimental values for plant uptake of pesticide from soil. PLOSone, 2017, 12(2), e0172254
136	Chlorfenapyr	4-bromo-2-(4-chlorophenyl)-1-(ethoxymethyl)-5-(trifluoromethyl)-1H-pyrrole-3-carbonitrile	122453-73-0	Okra	Abelmoschus esculentus	Saudi Arabia	Leaves	I	F	2.11	3.96	3.04	Ghani S.B.A.; Abdallah O.I. Method validation and dissipation dynamics of chlorfenapyr in squash and okra. Food Chemistry, 2016, 194, 516-521
136	Chlorfenapyr	4-bromo-2-(4-chlorophenyl)-1-(ethoxymethyl)-5-(trifluoromethyl)-1H-pyrrole-3-carbonitrile	122453-73-0	Okra	Abelmoschus esculentus	Saudi Arabia	Fruit	I	F	0.2	0.21	3.04	Ghani S.B.A.; Abdallah O.I. Method validation and dissipation dynamics of chlorfenapyr in squash and okra. Food Chemistry, 2016, 194, 516-521
136	Chlorfenapyr	4-bromo-2-(4-chlorophenyl)-1-(ethoxymethyl)-5-(trifluoromethyl)-1H-pyrrole-3-carbonitrile	122453-73-0	Orange	Citrus x sinensis	Egypt	Fruit	O	F	2.85	2.85	2.85	Sdeek F.A.; Morsy A.R.; Arafa H M.; Kamel E. Dissipation behavior of Chlorfenapyr on Citrus and Tomato in Egypt. International Journal of Innovation and Applied Studies, 2016, 18(1), 131.
136	Chlorfenapyr	4-bromo-2-(4-chlorophenyl)-1-(ethoxymethyl)-5-(trifluoromethyl)-1H-pyrrole-3-carbonitrile	122453-73-0	Pakchoi	Brassica rapa subsp. chinensis	China	Leaves	I	F	1.37	1.37	1.37	Ou X.-M.; Huang M.-Z.; Wang X.-G.; Fan D. Dissipation of Chlorfenapyr Residue in Pakchoi and Soil. Bulletin of Environmental Contamination and Toxicology, 2006, 77(6), 810-815.
136	Chlorfenapyr	4-bromo-2-(4-chlorophenyl)-1-(ethoxymethyl)-5-(trifluoromethyl)-1H-pyrrole-3-carbonitrile	122453-73-0	Pepper (chilli)	Capsicum annuum L.	India	Fruit	I	F	2.93	2.96	2.95	Ditya P.; Das S.P.; Sarkar P.K.; Bhattacharyya A. Degradation Dynamics of Chlorfenapyr Residue in Chili, Cabbage and Soil. Bulletin of Environmental Contamination and Toxicology, 2010, 84(5), 602-605.
136	Chlorfenapyr	4-bromo-2-(4-chlorophenyl)-1-(ethoxymethyl)-5-(trifluoromethyl)-1H-pyrrole-3-carbonitrile	122453-73-0	Squash	Cucurbita spp.	Saudi Arabia	Leaves	I	U	3.05	4.63	3.84	Ghani S.B.A.; Abdallah O.I. Method validation and dissipation dynamics of chlorfenapyr in squash and okra. Food Chemistry, 2016, 194, 516-521
136	Chlorfenapyr	4-bromo-2-(4-chlorophenyl)-1-(ethoxymethyl)-5-(trifluoromethyl)-1H-pyrrole-3-carbonitrile	122453-73-0	Squash	Cucurbita spp.	Saudi Arabia	Fruit	I	U	3.25	6.58	3.94	Ghani S.B.A.; Abdallah O.I. Method validation and dissipation dynamics of chlorfenapyr in squash and okra. Food Chemistry, 2016, 194, 516-521
136	Chlorfenapyr	4-bromo-2-(4-chlorophenyl)-1-(ethoxymethyl)-5-(trifluoromethyl)-1H-pyrrole-3-carbonitrile	122453-73-0	Tomato	Lycopersicon esculentum Mill.	Uruguay	Fruit	I	U	7	7	7	Galietta G.; Egaña E.; Gemelli F.; Maeso D.; Casco N.; Conde P.; Nueñz S. Pesticide dissipation curves in peach, pear and tomato crops in Uruguay. Journal of Environmental Science and Health, 2011, 46(1), 35-40. Calculated.
136	Chlorfenapyr	4-bromo-2-(4-chlorophenyl)-1-(ethoxymethyl)-5-(trifluoromethyl)-1H-pyrrole-3-carbonitrile	122453-73-0	Tomato	Lycopersicon esculentum Mill.	Egypt	Fruit	O	*	2.89	2.89	2.89	Sdeek F.A.; Morsy A.R.; Arafa H M.; Kamel E. (2016). Dissipation behavior of Chlorfenapyr on Citrus and Tomato in Egypt. International Journal of Innovation and Applied Studies, 18(1), 131
137	Chlorfenson	4-chlorophenyl 4-chlorobenzenesulfonate	80-33-1	Orange	Citrus x sinensis	*	Peel	I	F	5	5	5	Gunther F.A.; Blinn R.C. Persisting Insecticide Residues in Plant Materials. Annual Review of Entomology, 1956, 1, 167-180.
138	Chlorfenvinphos	2-chloro-1-(2,4-dichlorophenyl)ethenyl diethyl phosphate	470-90-6	Lemon	Citrus x limon	Spain	Fruit	I	F	17.33	23.1	20.22	Barba A.; Navarro S.; Cámara M.A. Persistence of the mixture of chlorfenvinphos and cypermethrin (Survan©) in citrus fruits. Journal of Environmental Science and Health, 1988, 23(4), 331-341. Calculated.
139	Chlorfluazuron	N-(((3,5-dichloro-4-((3-chloro-5-(trifluoromethyl)-2-pyridinyl)oxy)phenyl)amino)carbonyl)-2,6-difluorobenzamide	71422-67-8	Jujube	Ziziphus jujuba	*	Leaves	I	F	3.1	3.1	3.1	Guo D.-l.; Wang J.; Liu B.; Mao J.-S. Residue Detection and Degradation of Chlorfluazuron in Jujube. Agrochemicals, 2010, 49(10), 748-749,759.
139	Chlorfluazuron	N-(((3,5-dichloro-4-((3-chloro-5-(trifluoromethyl)-2-pyridinyl)oxy)phenyl)amino)carbonyl)-2,6-difluorobenzamide	71422-67-8	Leafy vegetables	*	China	Leaves	I	U	3.79	4.89	4.34	Shen Q.-g.; Zhao L.. Degradation Dynamics of Chlorfluazuron in Greens and Soil Under Plastic House. Journal of Shanghai Jiaotong University (Agricultural Science), 2008, 26(4), 316-318.
139	Chlorfluazuron	N-(((3,5-dichloro-4-((3-chloro-5-(trifluoromethyl)-2-pyridinyl)oxy)phenyl)amino)carbonyl)-2,6-difluorobenzamide	71422-67-8	Peach	Prunus persica	Republic of Korea	Fruit	I	F	7.15	8.56	7.86	Choi J.-H.; Mamun I.R.; Park J.-H.; Shin E.-H.; Shim J.-H. Determination of Field-Incurred Chlorfluazuron Residues in the Peach. Bulletin of Environmental Contamination and Toxicology, 2011, 86(3), 331-335. Calculated.
139	Chlorfluazuron	N-(((3,5-dichloro-4-((3-chloro-5-(trifluoromethyl)-2-pyridinyl)oxy)phenyl)amino)carbonyl)-2,6-difluorobenzamide	71422-67-8	Rice	Oryza sativa	China	Whole plant	I	F	6.01	6.27	6.14	Huo J.-C.; Sun Y.; Xu Y.-M.; Qin X.; Dai X.-H.; Wei D. Residue detection and degradation of chlorfluazuron in rice, soil and field water. Journal of Safety and Environment, 2010, 10(6), 13-18.
139	Chlorfluazuron	N-(((3,5-dichloro-4-((3-chloro-5-(trifluoromethyl)-2-pyridinyl)oxy)phenyl)amino)carbonyl)-2,6-difluorobenzamide	71422-67-8	Tea	Camellia sinensis cv. Oolong	China	Leaves	I	F	6.98	8.22	7.6	Chen L.; ShangGuan L.; Wu Y.; Xu L.; Fu F. Study on the residue and degradation of fluorine-containing pesticides in Oolong tea by using gas chromatography–mass spectrometry. Food Control, 2012, 25(2), 433-440.
1145	Chlorimuron-ethyl	ethyl 2-(4-chloro-6-methoxypyrimidin-2-ylcarbamoylsulfamoyl)benzoate	90982-32-4	Wheat	Triticum aestivum L.	USA	Straw	O	F	4	5	4.67	Schmitz G.L.; Witt W.W.; Mueller T.C.. The Effect of Wheat (Triticum aestivum) Straw Levels on Chlorimuron, Imazaquin, and Imazethapyr Dissipation and Interception. Weed Technology, 2001, 15(1), 129-136.
143	Chlormequat chloride	2-chloro-N,N,N-trimethylethanaminium chloride	999-81-5	Cotton	Gossypium hirsutum	China	Leaves	I	F	4.45	4.48	4.47	Guo X.-L.; Xu Y.-J.; Zhang F.-H.; Yu S.; Han L.-J.; Jiang S.-R. Chlormequat residues and dissipation rates in cotton crops and soil. Ecotoxicology and Environmental Safety, 2010, 73(4), 642-646.
143	Chlormequat chloride	2-chloro-N,N,N-trimethylethanaminium chloride	999-81-5	Wheat	Triticum aestivum L.	China	Straw	I	F	3.15	4.56	3.86	Guo X.L.; Jia C.H.; Zhao, E.C.; Xu Y. J.; Han L.J. and Jiang, S R. Dissipation and residues of chlormequat in wheat and soil. Bulletin of Environmental Contamination and Toxicology, 2010, 84(2), 221-224.
144	Chlorobenzilate	ethyl 4-chloro-alpha-(4-chlorophenyl)-a-hydroxybenzeneacetate	510-15-6	Lemon	Citrus x limon	CA, USA	Leaves	O	F	6.3	26	18	Iwata Y.; Duesch M.E.; Carman G.E.; Gunther F.A. Worker environment research: residues from carbaryl, chlorobenzilate, dimethoate, and trichlorfon applied to citrus trees. Journal of Agricultural and Food Chemistry, 1979, 27(6), 1141-1145.
144	Chlorobenzilate	ethyl 4-chloro-alpha-(4-chlorophenyl)-a-hydroxybenzeneacetate	510-15-6	Orange	Citrus x sinensis	CA, USA	Leaves	O	F	3.3	17	10.15	Iwata Y.; Duesch M.E.; Carman G.E.; Gunther F.A. Worker environment research: residues from carbaryl, chlorobenzilate, dimethoate, and trichlorfon applied to citrus trees. Journal of Agricultural and Food Chemistry, 1979, 27(6), 1141-1145.
144	Chlorobenzilate	ethyl 4-chloro-alpha-(4-chlorophenyl)-a-hydroxybenzeneacetate	510-15-6	Orange	Citrus x sinensis	FL, USA	Leaves	O	F	4.3	5.2	4.75	Nigg H.N.; Stamper J.H. Dislodgeable residues of chlorobenzilate in Florida citrus: Worker reentry implications. Chemosphere, 1984, 13(10), 1143-1156.
144	Chlorobenzilate	ethyl 4-chloro-alpha-(4-chlorophenyl)-a-hydroxybenzeneacetate	510-15-6	Orange	Citrus x sinensis	FL, USA	Leaves	O	F	6.3	26	16.15	Nigg H.N.; Stamper J.H. Dislodgeable residues of chlorobenzilate in Florida citrus: Worker reentry implications. Chemosphere, 1984, 13(10), 1143-1156.
144	Chlorobenzilate	ethyl 4-chloro-alpha-(4-chlorophenyl)-a-hydroxybenzeneacetate	510-15-6	Orange	Citrus x sinensis	FL, USA	Fruit	O	F	4.3	5.2	4.75	Nigg H.N.; Stamper J.H. Dislodgeable residues of chlorobenzilate in Florida citrus: Worker reentry implications. Chemosphere, 1984, 13(10), 1143-1156.
145	Chloroneb	1,4-dichloro-2,5-dimethoxybenzene	2675-77-6	Cotton	Gossypium hirsutum var. Stoneville 213	USA	Whole plant	I	U	8.35	13.59	10.97	Rhodes R.C.; Pease H.L.; Brantley R.K. Fate of carbon-14-labeled chloroneb in plants and soils. Journal of Agricultural and Food Chemistry, 1971, 19(4), 745-749. Calculated.
145	Chloroneb	1,4-dichloro-2,5-dimethoxybenzene	2675-77-6	Cotton	Gossypium hirsutum var. Stoneville 213	USA	Whole plant	I	F	8.35	13.59	10.97	Rhodes R.C.; Pease H.L.; Brantley R.K. Fate of carbon-14-labeled chloroneb in plants and soils. Journal of Agricultural and Food Chemistry, 1971, 19(4), 745-749. Calculated.
145	Chloroneb	1,4-dichloro-2,5-dimethoxybenzene	2675-77-6	Green bean	Phaseolus vulgaris var. Wade	USA	Whole plant	I	U	6.36	7.79	7.08	Rhodes R.C.; Pease H.L.; Brantley R.K. Fate of carbon-14-labeled chloroneb in plants and soils. Journal of Agricultural and Food Chemistry, 1971, 19(4), 745-749. Calculated.
145	Chloroneb	1,4-dichloro-2,5-dimethoxybenzene	2675-77-6	Green bean	Phaseolus vulgaris var. Wade	USA	Whole plant	I	F	6.36	7.79	7.08	Rhodes R.C.; Pease H.L.; Brantley R.K. Fate of carbon-14-labeled chloroneb in plants and soils. Journal of Agricultural and Food Chemistry, 1971, 19(4), 745-749. Calculated.
145	Chloroneb	1,4-dichloro-2,5-dimethoxybenzene	2675-77-6	Kentucky bluegrass	Poa pratensis L.	USA	Thatch	I	F	8.7	69.3	39	Frederick E.K.; Bischoff M.; Throssell C.S.; Turco R.F. Degradation of chloroneb, triadimefon, and vinclozolin in soil, thatch, and grass clippings. Bulletin of Environmental Contamination and Toxicology, 1994, 53(4), 536-542.
145	Chloroneb	1,4-dichloro-2,5-dimethoxybenzene	2675-77-6	Kentucky bluegrass	Poa pratensis L.	IN, USA	Thatch	I	F	69.3	69.3	69.3	Sigler W.V.; Taylor C.P.; Throssell C.S.; Bischoff M.; Turco R.F. Environmental Fates of Fungicides in the Turfgrass Environment: A Mini review. In: Clark, J.M., Kenna, M.P. (Eds.). Fate and Management of Turfgrass Chemicals. American Chemical, 1999, Chaper 8.
150	Chlorothalonil	2,4,5,6-tetrachloro-1,3-benzenedicarbonitrile	1897-45-6	Apple	Malus pumila Mill. var. McIntosh	NY, USA	Leaves	O	F	4.1	4.1	4.1	Gilbert M. Fate of chlorothalonil in apple foliage and fruit. Journal of Agricultural and Food Chemistry, 1976, 24(5), 1004-1007.
150	Chlorothalonil	2,4,5,6-tetrachloro-1,3-benzenedicarbonitrile	1897-45-6	Apple	Malus pumila Mill.	*	Leaves	O	F	5	5	5	Cited in Northover J.; Ripley B.D. Persistence of chlorothalonil on grapes and its effect on disease control and fruit quality. Journal of Agricultural and Food Chemistry, 1980, 28(5), 971-974.
150	Chlorothalonil	2,4,5,6-tetrachloro-1,3-benzenedicarbonitrile	1897-45-6	Banana	Musa spp.	Costa Rica	Leaves	I	F	3.9	3.9	3.9	Chaves A.; Shea D.; Cope W.G. Environmental fate of chlorothalonil in a Costa Rican banana plantation. Chemosphere, 2007, 69(7), 1166-1174.
150	Chlorothalonil	2,4,5,6-tetrachloro-1,3-benzenedicarbonitrile	1897-45-6	Bentgrass	Agrostis palustris var. Huds	USA	Blades	O	F	2.2	5.6	3.9	Wu L.; Liu G.; Yates M.V.; Green R.L.; Pacheco P.; Gan J.; Yates S.R. Environmental fate of metalaxyl and chlorothalonil applied to bentgrass putting green under southern California climatic conditions. Pest Management Science, 2002, 58, 335–342.
150	Chlorothalonil	2,4,5,6-tetrachloro-1,3-benzenedicarbonitrile	1897-45-6	Betel	Piper betle	India	Leaves	I	F	4.62	6.02	5.32	Sur N.; Gupta B.D.; Banerjee H.; Bhattacharyya A. Studies on the Persistence of Chlorothalonil in/on Betelvine. Pesticide Research Journal, 1999, 11(2), 157-161.
150	Chlorothalonil	2,4,5,6-tetrachloro-1,3-benzenedicarbonitrile	1897-45-6	Cabbage (spring)	Brassica oleracea capitata	China	Head	I	F	1.8	4.1	2.95	Zhang Z.-Y.; Liu X.-J.; Yu X.-Y.; Zhang C.-Z.; Hon X.-Y. Pesticide residues in the spring cabbage (Brassica oleracea L. var. capitata) grown in open field. Food Control, 2007, 18(6), 723-730.
150	Chlorothalonil	2,4,5,6-tetrachloro-1,3-benzenedicarbonitrile	1897-45-6	Cabbage	Brassica oleracea capitata	China	Leaves	I	F	1.7	1.7	1.7	Hou F.; Zhao L.; Liu F. Residues and dissipation of chlorothalonil and azoxystrobin in cabbage under field conditions. International Journal of Environmental Analytical Chemistry, 2016, 96(12), 1105-1116.
150	Chlorothalonil	2,4,5,6-tetrachloro-1,3-benzenedicarbonitrile	1897-45-6	Chinese cabbage	Brassica rapa subsp. pekinensis	China	Leaves	I	F	4	5.9	4.95	Zhang Z.Y.; Zhang C.Z.; Liu X.J.; Hong X.Y. Dynamics of pesticide residues in the autumn Chinese cabbage (Brassica chinensis L.) grown in open fields. Pest Management Science, 2006, 62(4), 350-355.
150	Chlorothalonil	2,4,5,6-tetrachloro-1,3-benzenedicarbonitrile	1897-45-6	Chrysanthemum	Chrysanthemum morifolium	*	Leaves	O	U	3.2	5.3	4.25	Brouwer D.H.; de Haan M.; Leenheers L.H.; de Vreede S.A.F.; van Hemmen J.J. Half-Lives of Pesticides on Greenhouse Crops. Bulletin of Environmental Contamination and Toxicology, 1997, 58(6), 976-984.
150	Chlorothalonil	2,4,5,6-tetrachloro-1,3-benzenedicarbonitrile	1897-45-6	Cranberry	Vaccinium spp.	MA, USA	Fruit	I	F	12.1	13.2	12.65	Putnam R.A.; Nelson J.O.; Clark J.M. The Persistence and Degradation of Chlorothalonil and Chlorpyrifos in a Cranberry Bog. Journal of Agricultural and Food Chemistry, 2003, 51(1), 170-176.
150	Chlorothalonil	2,4,5,6-tetrachloro-1,3-benzenedicarbonitrile	1897-45-6	Creeping bentgrass	Agrostis stolonifera L. var. Penncross	WI, USA	Leaves	O	F (at 10 DegC)	9.5	9.5	9.5	Koch P.L.; Kerns J.P. Temperature Influences Persistence of Chlorothalonil and Iprodione on Creeping Bentgrass Foliage. Plant Health Progress, 2015, 16(3), 107.
150	Chlorothalonil	2,4,5,6-tetrachloro-1,3-benzenedicarbonitrile	1897-45-6	Creeping bentgrass	Agrostis stolonifera L. var. Penncross	WI, USA	Leaves	O	F (at 20 DegC)	4.3	4.3	4.3	Koch P.L.; Kerns J.P. Temperature Influences Persistence of Chlorothalonil and Iprodione on Creeping Bentgrass Foliage. Plant Health Progress, 2015, 16(3), 107.
150	Chlorothalonil	2,4,5,6-tetrachloro-1,3-benzenedicarbonitrile	1897-45-6	Creeping bentgrass	Agrostis stolonifera L. var. Penncross	WI, USA	Leaves	O	F (at 30 DegC)	4	4	4	Koch P.L.; Kerns J.P. Temperature Influences Persistence of Chlorothalonil and Iprodione on Creeping Bentgrass Foliage. Plant Health Progress, 2015, 16(3), 107.
150	Chlorothalonil	2,4,5,6-tetrachloro-1,3-benzenedicarbonitrile	1897-45-6	Cucumber	Cucumis sativus L.	Brazil	Fruit	I	U	1.1	2.2	1.65	Kurz M.H.S.; Gonçalves F.F.; Adaime M.B.; da Costa I.F.D.; Primel E.G.; Zanella, R. A Gas Chromatographic Method for the Determination of the Fungicide Chlorothalonil in Tomatoes and Cucumbers and its Application to Dissipation Studies in Experimental Greenhouses, Journal of the Brazilian Chemical Society, 2008, 19(6), 1129-1135.
150	Chlorothalonil	2,4,5,6-tetrachloro-1,3-benzenedicarbonitrile	1897-45-6	Cucumber	Cucumis sativus L.	Spain	Fruit	I	U	5.28	5.28	5.28	Valverde-Garcia A.; Gonzalez-Pradas E.; Aguilera-Del Real A.; Ureña-Amate M.D.; Camacho-Ferre F. Determination and degradation study of chlorothalonil residues in cucumbers, peppers and cherry tomatoes. Analytica Chimica Acta, 1993, 276(1), 15-23.
150	Chlorothalonil	2,4,5,6-tetrachloro-1,3-benzenedicarbonitrile	1897-45-6	Grape	Vitis vinifera L. cv. Agawan & De Chaunac	Canada	Fruit	O	F	10	15	12.5	Northover J.; Ripley B.D. Persistence of chlorothalonil on grapes and its effect on disease control and fruit quality. Journal of Agricultural and Food Chemistry, 1980, 28(5), 971-974.
150	Chlorothalonil	2,4,5,6-tetrachloro-1,3-benzenedicarbonitrile	1897-45-6	Onion	Allium cepa L.	*	Leaves	O	F	3	3	3	Northover J.; Ripley B.D. Persistence of chlorothalonil on grapes and its effect on disease control and fruit quality. Journal of Agricultural and Food Chemistry, 1980, 28(5), 971-974.
150	Chlorothalonil	2,4,5,6-tetrachloro-1,3-benzenedicarbonitrile	1897-45-6	Pepper	Capsicum spp.	Spain	Fruit	I	U	7.34	7.34	7.34	Valverde-Garcia A.; Gonzalez-Pradas E.; Aguilera-Del Real A.; Ureña-Amate M.D.; Camacho-Ferre F. Determination and degradation study of chlorothalonil residues in cucumbers, peppers and cherry tomatoes. Analytica Chimica Acta, 1993, 276(1), 15-23.
150	Chlorothalonil	2,4,5,6-tetrachloro-1,3-benzenedicarbonitrile	1897-45-6	Potato	Solanum tuberosum	*	Leaves	O	*	1.23	7.3	4.27	Bruhn J.A.; Fry W.E. A Mathematical Model of the Spatial and Temporal Dynamics of Chlorothalonil Residues on Potato Foliage. Phytopathology, 1982, 72(10), 306-312.
150	Chlorothalonil	2,4,5,6-tetrachloro-1,3-benzenedicarbonitrile	1897-45-6	Spinach	Spinacia oleracea	China	Leaves	I	F	2.63	3.39	3.01	Chen Z.-D.; Feng M.-X.; Yuan Y.-W.; Chen Y.-l.; Lian Z.-X. Research on residue dynamics laden in some commonly used pesticides in spinach. Journal of Safety and Environment, 2007, 7(3), 1-4.
150	Chlorothalonil	2,4,5,6-tetrachloro-1,3-benzenedicarbonitrile	1897-45-6	Spinach	Spinacia oleracea	India	Leaves	I	F	2.03	2.03	2.03	Divakara J.V.; Sharma D. Persistence of Chlorothalonil in Spinach Cultivated under Open and Protected Conditions. Chemical Science Review and letters, 2016, 5(20), 50-53.
150	Chlorothalonil	2,4,5,6-tetrachloro-1,3-benzenedicarbonitrile	1897-45-6	Spinach	Spinacia oleracea	India	Leaves	I	U	2.12	2.12	2.12	Divakara J.V.; Sharma D. Persistence of Chlorothalonil in Spinach Cultivated under Open and Protected Conditions. Chemical Science Review and letters, 2016, 5(20), 50-53.
150	Chlorothalonil	2,4,5,6-tetrachloro-1,3-benzenedicarbonitrile	1897-45-6	Strawberry	Fragaria x ananassa	China	Fruit	I	U	3.76	3.76	3.76	Zhang Z.-H.; Li H.-Y.; Wu M.; Yuan Y.-W.; Hu X.-Q.; Zheng W.-R. Residue and Risk Assessment of Chlorothalonil, Myclobutanil and Pyraclostrobin in Greenhouse Strawberry. Chinese Journal of Pesticide Science, 2009, 11(4), 449-455.
150	Chlorothalonil	2,4,5,6-tetrachloro-1,3-benzenedicarbonitrile	1897-45-6	Strawberry	Fragaria x ananassa	Norway	Fruit	I	U	4.25	4.47	4.36	Stensvand A.l; Christiansen A. Investigation on Fungicide Residues in Greenhouse-Grown Strawberries. Journal of Agricultural and Food Chemistry, 2000, 48(3), 917-920. Calculated.
150	Chlorothalonil	2,4,5,6-tetrachloro-1,3-benzenedicarbonitrile	1897-45-6	Tomato	Lycopersicon esculentum Mill.	Egypt	Fruit	I	*	2.06	2.06	2.06	Abd Al-Rahman S.H.; Almaz M.M.; Ahmed N.S. Dissipation of Fungicides, Insecticides, and Acaricide in Tomato Using HPLC-DAD and QuEChERS Methodology. Food Analytical Methods, 2012, 5(3), 564-570.
150	Chlorothalonil	2,4,5,6-tetrachloro-1,3-benzenedicarbonitrile	1897-45-6	Tomato	Lycopersicon esculentum Mill.	Brazil	Fruit	I	U	3.5	10.8	7.15	Kurz M.H.S.; Gonçalves F.F.; Adaime M.B.; da Costa I.F.D.; Primel E.G.; Zanella, R. A Gas Chromatographic Method for the Determination of the Fungicide Chlorothalonil in Tomatoes and Cucumbers and its Application to Dissipation Studies in Experimental Greenhouses. Journal of the Brazilian Chemical Society, 2008, 19(6), 1129-1135.
150	Chlorothalonil	2,4,5,6-tetrachloro-1,3-benzenedicarbonitrile	1897-45-6	Tomato	Lycopersicon esculentum Mill.	Brazil	Fruit	O	U	6.5	6.5	6.5	Kurz M.H.S.; Gonçalves F.F.; Adaime M.B.; da Costa I.F.D.; Primel E.G.; Zanella, R. A Gas Chromatographic Method for the Determination of the Fungicide Chlorothalonil in Tomatoes and Cucumbers and its Application to Dissipation Studies in Experimental Greenhouses, Journal of the Brazilian Chemical Society, 2008, 19(6), 1129-1135.
150	Chlorothalonil	2,4,5,6-tetrachloro-1,3-benzenedicarbonitrile	1897-45-6	Tomato	Lycopersicon esculentum Mill.		Fruit	I	U	11.53	11.53	11.53	Valverde-Garcia A.; Gonzalez-Pradas E.; Aguilera-Del Real A.; Ureña-Amate M.D.; Camacho-Ferre F. Determination and degradation study of chlorothalonil residues in cucumbers, peppers and cherry tomatoes. Analytica Chimica Acta, 1993, 276(1), 15-23.
150	Chlorothalonil	2,4,5,6-tetrachloro-1,3-benzenedicarbonitrile	1897-45-6	Tomato	Lycopersicon esculentum Mill. var. Marissa	Poland	Fruit	I	U	5	5	5	Jankowska M.; Kaczynski P.; Hrynko I.; Lozowicka B. Dissipation of six fungicides in greenhouse-grown tomatoes with processing and health risk. Environmental Science and Pollution Research, 2016, 23(12), 11885-11900.
150	Chlorothalonil	2,4,5,6-tetrachloro-1,3-benzenedicarbonitrile	1897-45-6	Tomato	Lycopersicon esculentum Mill. var. Harzfeuer	Poland	Fruit	I	U	5.32	5.32	5.32	Jankowska M.; Kaczynski P.; Hrynko I.; Lozowicka B. Dissipation of six fungicides in greenhouse-grown tomatoes with processing and health risk. Environmental Science and Pollution Research, 2016, 23(12), 11885-11900.
150	Chlorothalonil	2,4,5,6-tetrachloro-1,3-benzenedicarbonitrile	1897-45-6	Wheat	Triticum aestivum L.	*	Straw	I	F	8.2	8.2	8.2	Cao T.T. Fate and a Prediction Model of Pesticides Residues Evolution in Plants. École Polytechnique Fédérale de Lausanne, Lausanne, Switzerland. 2001.
1290	Chlorphoxim	7-(2-chlorophenyl)-4-ethoxy-3,5-dioxa-6-aza-4-phosphaoct-6-ene-8-nitrile 4-sulfide	14816-20-7	Bermuda grass (coastal)	Cynodon dactylon	GA, USA	Leaves	I	F	1.1	1.1	1.1	Leuck D.B.; Bowman M.C. Chlorphoxim residues: Their persistence in coastal bermuda grass. Journal of Economic Entomology, 66, 798-799
154	Chlorpyrifos	O,O-diethyl O-(3,5,6-trichloro-2-pyridinyl) phosphorothioate	2921-88-2	Amaranth (summer)	Amaranthus spp.	China	Leaves	I	F	0.6	1.3	0.95	Fan S.; Deng K.; Yu C.; Zhao P.; Bai A.; Li Y.; Pan C.; Li X. Influence of different planting seasons of six leaf vegetables on residues of five pesticides. Journal of Agricultural and Food Chemistry, 2013, 61(38), 9036-9044.
154	Chlorpyrifos	O,O-diethyl O-(3,5,6-trichloro-2-pyridinyl) phosphorothioate	2921-88-2	Amaranth (autumn)	Amaranthus spp.	China	Leaves	I	F	5.3	7.8	6.55	Fan S.; Deng K.; Yu C.; Zhao P.; Bai A.; Li Y.; Pan C.; Li X. Influence of different planting seasons of six leaf vegetables on residues of five pesticides. Journal of Agricultural and Food Chemistry, 2013, 61(38), 9036-9044.
154	Chlorpyrifos	O,O-diethyl O-(3,5,6-trichloro-2-pyridinyl) phosphorothioate	2921-88-2	Annual bluegrass	Poa annua L.	Canada	Thatch & roots	I	F	14.7	14.7	14.7	Sears M.K.; Chapman R.A. Persistence and movement of four insecticides applied to turfgrass. Journal of Economic Entomology, 1979, 72(2), 272-274.
154	Chlorpyrifos	O,O-diethyl O-(3,5,6-trichloro-2-pyridinyl) phosphorothioate	2921-88-2	Apple	Malus pumila Mill	Chile	Leaves	I	F	2.3	2.7	2.5	Junod J.; Zagal E.; Sandoval M.; Venegas A.; Campos J.; Radrigan R.; Barra R.; Vidal G. Variability associated with the determination of residues of chlorpyrifos when applied to an apple orchard. Journal of Soil Science and Plant Nutrition, 2009, 9(3), 176-189
154	Chlorpyrifos	O,O-diethyl O-(3,5,6-trichloro-2-pyridinyl) phosphorothioate	2921-88-2	Apple	Malus pumila Mill.	Pakistan	Fruit	O	F	4.85	5.57	5.21	Khan B.A. Studies on the Residues of Commonly Used Insecticides on Fruits and Vegetables Grown in NWFP-Pakistan. Department of Agricultural Chemistry. NWFP Agricultural University Peshawar, Pakistan, 2005, p. 193.
154	Chlorpyrifos	O,O-diethyl O-(3,5,6-trichloro-2-pyridinyl) phosphorothioate	2921-88-2	Apple	Malus pumila Mill	Chile	Fruit	I	F	5	8.3	6.65	Junod J.; Zagal E.; Sandoval M.; Venegas A.; Campos J.; Radrigan R.; Barra R.; Vidal G. Variability associated with the determination of residues of chlorpyrifos when applied to an apple orchard. Journal of Soil Science and Plant Nutrition, 2009, 9(3), 176-189
154	Chlorpyrifos	O,O-diethyl O-(3,5,6-trichloro-2-pyridinyl) phosphorothioate	2921-88-2	Apple	Malus pumila Mill.	India	Fruit	I	F	5.2	5.2	5.2	Sharma I.D.; Nath A. Persistence of different pesticides in apple. ISHS Acta Horticulturae, 2005, 696, 437-440.
154	Chlorpyrifos	O,O-diethyl O-(3,5,6-trichloro-2-pyridinyl) phosphorothioate	2921-88-2	Apple	Malus pumila Mill. cv. Brookfield	Italy	Fruit	I	F	8.6	8.6	8.6	Passarella I.; Elia I.; Guarino B.; Bourlot G.; Nègre M. Evaluation of the field dissipation of fungicides and insecticides used on fruit bearing trees in northern Italy. Journal of Environmental Science and Health, 2009, 44(2), 137-143.
154	Chlorpyrifos	O,O-diethyl O-(3,5,6-trichloro-2-pyridinyl) phosphorothioate	2921-88-2	Apple	Malus pumila Mill. cv. Golden delicious	Italy	Fruit	I	F	18	18	18	Passarella I.; Elia I.; Guarino B.; Bourlot G.; Nègre M. Evaluation of the field dissipation of fungicides and insecticides used on fruit bearing trees in northern Italy. Journal of Environmental Science and Health, 2009, 44(2), 137-143.
154	Chlorpyrifos	O,O-diethyl O-(3,5,6-trichloro-2-pyridinyl) phosphorothioate	2921-88-2	Asparagus lettuce	Lactuca sativa var. Angustana	China	Edible parts	I	U	3.9	3.9	3.9	Lu M.X.; Jiang W.W.; Wang J.L.; Jian Q.; Shen Y.; Liu X.J.; Yu X.Y. Persistence and dissipation of chlorpyrifos in brassica chinensis, lettuce, celery, asparagus lettuce, eggplant, and pepper in a greenhouse. PLOSone, 2014, 9(6), e100556.
154	Chlorpyrifos	O,O-diethyl O-(3,5,6-trichloro-2-pyridinyl) phosphorothioate	2921-88-2	Bermuda grass	Cynodon dactylon	GA, USA	Leaves	I	F	2.9	2.9	2.9	Willis G.H.; McDowell L.L. Pesticide persistence on foliage. Reviews of Environmental Contamination and Toxicology, 1987, 100, 23-73.
154	Chlorpyrifos	O,O-diethyl O-(3,5,6-trichloro-2-pyridinyl) phosphorothioate	2921-88-2	Cabbage	Brassica oleracea capitata+G1468	China	Head	I	F	2.1	2.1	2.1	Yuan Y.-W.; Si C.-G.; Lin H.; Wang J.; Ye Z.-H. Residual Dynamics of Chlorpyrifos, Fenvalerate and Beta-Cypermethrin in Cabbage. Journal of Agro-Environment Science, 2008, 27(3), 1199-1202.
154	Chlorpyrifos	O,O-diethyl O-(3,5,6-trichloro-2-pyridinyl) phosphorothioate	2921-88-2	Cabbage	Brassica oleracea capitata	India	Head	I	F	8.75	8.75	8.75	Aktar M.W.; Paramasivam M.; Purkait S.; Sengupta D. Degradation dynamics and risk assessment of chlorpyriphos in/on cabbage under different culinary processes. Orbital, 2008, 1(1), 1-8.
154	Chlorpyrifos	O,O-diethyl O-(3,5,6-trichloro-2-pyridinyl) phosphorothioate	2921-88-2	Cabbage	Brassica oleracea capitata	China	Head	I	U	11.05	11.05	11.05	Du H.-y.; Zhang Q.; Ma L. Dynamic Study on Residue of Chlorpirifos in Four Kinds of Vegetables in Greenhouse. Shandong Agricultural Sciences, 2009, (10), 58-61.
154	Chlorpyrifos	O,O-diethyl O-(3,5,6-trichloro-2-pyridinyl) phosphorothioate	2921-88-2	Cabbage	Brassica oleracea capitata	China	Head	I	F	1.65	1.82	1.7	Hong, W.Y.; Xie G X.; Wu Y.J.; Chen R. Residual dynamics of chlorpyrifos in cabbage [J]. Acta Agriculturae Zhejiangensis, 2009, 6, 022.
154	Chlorpyrifos	O,O-diethyl O-(3,5,6-trichloro-2-pyridinyl) phosphorothioate	2921-88-2	Cabbage (spring)	Brassica oleracea capitata	China	Head	I	F	2	2.9	2.45	Zhang Z.-Y.; Zhang C.-Z.; Liu X.-J.; Hong X.-Y. Dynamics of pesticide residues in the autumn Chinese cabbage (Brassica chinensis L.) grown in open fields. Pest Management Science, 2006, 62(4), 350-355.
154	Chlorpyrifos	O,O-diethyl O-(3,5,6-trichloro-2-pyridinyl) phosphorothioate	2921-88-2	Carob	Ceratonia siliqua	China	Pods	I	F	4.3	4.45	4.4	Wu H.; Li B.-Q.; Lin Q.-F.; Huang H.; Ou J.-F.; Liu G.-Q. The Residue Dynamic of Chlorpyrifos in Carob, Chili and Soil. Agrochemicals, 2007, 46(11), 767-769, 778.
154	Chlorpyrifos	O,O-diethyl O-(3,5,6-trichloro-2-pyridinyl) phosphorothioate	2921-88-2	Cauliflower	Brassica oleraceea botrytis	India	Head	O	F	1.4	1.6	1.5	Raina A.K.; Raina M. Dissipation of Chlorpyriphos on Cauliflower (Brassica oleraceea Var. botrytis). Pesticide Research Journal, 2008, 20(2), 263-265.
154	Chlorpyrifos	O,O-diethyl O-(3,5,6-trichloro-2-pyridinyl) phosphorothioate	2921-88-2	Celery	Apium graveolens	China	Whole plant	I	U	5.45	5.45	5.45	Lu M. X.; Jiang W.W.; Wang J.L.; Jian Q.; Shen Y.; Liu X.J.; Yu X.Y. Persistence and dissipation of chlorpyrifos in brassica chinensis, lettuce, celery, asparagus lettuce, eggplant, and pepper in a greenhouse. PLOSone, 2014, 9(6), e100556.
154	Chlorpyrifos	O,O-diethyl O-(3,5,6-trichloro-2-pyridinyl) phosphorothioate	2921-88-2	Chinese cabbage	Brassica rapa subsp. pekinensis	China	Leaves	I	U	5.81	5.81	5.81	Lu M. X.; Jiang W.W.; Wang J.L.; Jian Q.; Shen Y.; Liu X.J.; Yu X.Y. Persistence and dissipation of chlorpyrifos in brassica chinensis, lettuce, celery, asparagus lettuce, eggplant, and pepper in a greenhouse. PLOSone, 2014, 9(6), e100556.
154	Chlorpyrifos	O,O-diethyl O-(3,5,6-trichloro-2-pyridinyl) phosphorothioate	2921-88-2	Chinese cabbage	Brassica rapa subsp. pekinensis	China	Leaves	I	F	3.6	4.7	4.15	Zhang Z.-Y.; Zhang C.-Z.; Liu X.-J.; Hong X.-Y. Dynamics of pesticide residues in the autumn Chinese cabbage (Brassica chinensis L.) grown in open fields. Pest Management Science, 2006, 62(4), 350-355.
154	Chlorpyrifos	O,O-diethyl O-(3,5,6-trichloro-2-pyridinyl) phosphorothioate	2921-88-2	Collard	Brassica oleracea	KY, USA	Leaves	O	F	5.1	5.1	5.1	Antonious G.F.; Turley E.T.; Abubakari M.; Snyder J.C. Dissipation, half-lives, and mass spectrometric identification of chlorpyrifos and its two metabolites on field-grown collard and kale. Journal of Environmental Science and Health, Part B, 2017, 12(1), 251-255.
154	Chlorpyrifos	O,O-diethyl O-(3,5,6-trichloro-2-pyridinyl) phosphorothioate	2921-88-2	Cotton	Gossypium hirsutum L.	AZ, USA	Leaves	O	F	0.7	0.9	0.8	Willis G.H.; McDowell L.L. Pesticide persistence on foliage. Reviews of Environmental Contamination and Toxicology, 1987, 100, 23-73.
154	Chlorpyrifos	O,O-diethyl O-(3,5,6-trichloro-2-pyridinyl) phosphorothioate	2921-88-2	Cranberry	Vaccinium spp.	MA, USA	Fruit	I	X (cranberry bog)	3.3	3.8	3.55	Putnam R.A.; Nelson J.O.; Clark J.M. The Persistence and Degradation of Chlorothalonil and Chlorpyrifos in a Cranberry Bog. Journal of Agricultural and Food Chemistry, 2003, 51(1), 170-176.
154	Chlorpyrifos	O,O-diethyl O-(3,5,6-trichloro-2-pyridinyl) phosphorothioate	2921-88-2	Creeping bentgrass	Agrostis palustris var. Huds	California, USA	Blades	I	F	6.4	247.6	127	Wu L.; Green R.L.; Liu G.; Yates M.V.; Pacheco P.; Gan J.; Yates S.R. Partitioning and persistence of trichlorfon and chlorpyrifos in a creeping bentgrass putting green. Journal of Environmental Quality, 2002, 31(3), 889-895.
154	Chlorpyrifos	O,O-diethyl O-(3,5,6-trichloro-2-pyridinyl) phosphorothioate	2921-88-2	Crown daisy (summer)	Glebionis coronaria	China	Leaves	I	F	1.4	5.6	3.5	Fan S.; Deng K.; Yu C.; Zhao P.; Bai A.; Li Y.; Pan C.; Li X. Influence of different planting seasons of six leaf vegetables on residues of five pesticides. Journal of Agricultural and Food Chemistry, 2013, 61(38), 9036-9044.
154	Chlorpyrifos	O,O-diethyl O-(3,5,6-trichloro-2-pyridinyl) phosphorothioate	2921-88-2	Crown daisy (autumn)	Glebionis coronaria	China	Leaves	I	F	5	9.8	7.4	Fan S.; Deng K.; Yu C.; Zhao P.; Bai A.; Li Y.; Pan C.; Li X. Influence of different planting seasons of six leaf vegetables on residues of five pesticides. Journal of Agricultural and Food Chemistry, 2013, 61(38), 9036-9044.
154	Chlorpyrifos	O,O-diethyl O-(3,5,6-trichloro-2-pyridinyl) phosphorothioate	2921-88-2	Cucumber	Cucumis sativus L.	China	Fruit	I	U	1.6	1.6	1.6	Liang Y.; Wang W.; Shen Y.; Liu Y.; Liu X.J. Dynamics and residues of chlorpyrifos and dichlorvos in cucumber grown in greenhouse. Food Control, 2012, 26(2), 231-234.
154	Chlorpyrifos	O,O-diethyl O-(3,5,6-trichloro-2-pyridinyl) phosphorothioate	2921-88-2	Cucumber	Cucumis sativus L.	China	Fruit	I	U	8.36	8.36	8.36	Du H.-Y.; Zhang Q.; Ma L. Dynamic Study on Residue of Chlorpirifos in Four Kinds of Vegetables in Greenhouse. Shandong Agricultural Sciences, 2009, (10), 58-61.
154	Chlorpyrifos	O,O-diethyl O-(3,5,6-trichloro-2-pyridinyl) phosphorothioate	2921-88-2	Eggplant	Solanum melongena L.	India	Fruit	I	F	3.1	3.27	3.19	Mukherjee I.; Kumar A.; Kumar A. Persistence Behavior of Combination Mix Crop Protection Agents in/on Eggplant Fruits. Bulletin of Environmental Contamination and Toxicology, 2012, 88(3), 338-343.
154	Chlorpyrifos	O,O-diethyl O-(3,5,6-trichloro-2-pyridinyl) phosphorothioate	2921-88-2	Eggplant	Solanum melongena L.	China	Whole plant	I	U	3	3	3	Lu M.X.; Jiang W.W.; Wang J.L.; Jian Q.; Shen Y.; Liu X.J.; Yu X.Y. Persistence and dissipation of chlorpyrifos in brassica chinensis, lettuce, celery, asparagus lettuce, eggplant, and pepper in a greenhouse. PLOSone, 2014, 9(6), e100556
154	Chlorpyrifos	O,O-diethyl O-(3,5,6-trichloro-2-pyridinyl) phosphorothioate	2921-88-2	Garlic chives	Allium tuberosum	China	Leaves	I	F	2.38	2.42	2.4	Chen Z.-D.; Yuan Y.-W.; Chen X.-H.; Feng M.-X.; Lian Z.-X. Residual dynamics of chlorpyrifos in Allium tuberosum. Journal of Safety and Environment, 2006, 6(6), 41-43.
154	Chlorpyrifos	O,O-diethyl O-(3,5,6-trichloro-2-pyridinyl) phosphorothioate	2921-88-2	Garlic chives	Allium tuberosum	China	Root	I	F	3.42	3.81	3.62	Chen Z.-D.; Yuan Y.-W.; Chen X.-H.; Feng M.-X.; Lian Z.-X. Residual dynamics of chlorpyrifos in Allium tuberosum. Journal of Safety and Environment, 2006, 6(6), 41-43.
154	Chlorpyrifos	O,O-diethyl O-(3,5,6-trichloro-2-pyridinyl) phosphorothioate	2921-88-2	Grape (sultana)	Vitis vinifera cv. Thompson seedless	Australia	Fruit	I	F	2	10	6	McDonald G.; Buchanan G.A.; Griffiths G.R. Insecticide application and degradation in sultana grapes grown for drying. Pesticide Science, 1983, 14(5), 528-536.
154	Chlorpyrifos	O,O-diethyl O-(3,5,6-trichloro-2-pyridinyl) phosphorothioate	2921-88-2	Grape	Vitis vinifera	Spain	Fruit	I	F	4.4	4.4	4.4	Navarro S.; Oliva J.; Navarro G.; Barba A. Dissipation of Chlorpyrifos, Fenarimol, Mancozeb, Metalaxyl, Penconazole, and Vinclozolin in Grapes. American Journal of Enology and Viticulture, 2001, 51(1), 35-40.
154	Chlorpyrifos	O,O-diethyl O-(3,5,6-trichloro-2-pyridinyl) phosphorothioate	2921-88-2	Grape (wine)	Vitis vinifera cv. Cabernet	Italy	Fruit	I	F	6.7	7.8	7.3	Angioni A.; Dedola F.; Garau A.; Sarais G.; Cabras P.; Caboni P. Chlorpyrifos residues levels in fruits and vegetables after field treatment. Journal of Environmental Science and Health, Part B, 2011, 46(6), 544-549
154	Chlorpyrifos	O,O-diethyl O-(3,5,6-trichloro-2-pyridinyl) phosphorothioate	2921-88-2	Grape (table)	Vitis vinifera cv. Uva Italia	Italy	Fruit	I	F	7.7	13.9	10.8	Angioni A.; Dedola F.; Garau A.; Sarais G.; Cabras P.; Caboni P. Chlorpyrifos residues levels in fruits and vegetables after field treatment. Journal of Environmental Science and Health, Part B, 2011, 46(6), 544-549
154	Chlorpyrifos	O,O-diethyl O-(3,5,6-trichloro-2-pyridinyl) phosphorothioate	2921-88-2	Green bean	Phaseolus vulgaris cv. Helda	Spain	Fruit	I	U	4.11	4.68	4.4	Martínez Vidal J.L.; Egea González F.J.; Martínez Galera M.; Castro Cano M.L. Diminution of Chlorpyrifos and Chlorpyrifos Oxon in Tomatoes and Green Beans Grown in Greenhouses. Journal of Agricultural and Food Chemistry, 1998, 46(4), 1440-1444.
154	Chlorpyrifos	O,O-diethyl O-(3,5,6-trichloro-2-pyridinyl) phosphorothioate	2921-88-2	Green mustard	Brassica juncea L. var. Coss	Malaysia	Leaves	I	F	1.1	1.5	1.3	Chai L.-K.; Mohd-Tahir N.; Bruun Hansen H.C. Dissipation of acephate, chlorpyrifos, cypermethrin and their metabolites in a humid-tropical vegetable production system. Pest Management Science, 2009, 65(2), 189-196.
154	Chlorpyrifos	O,O-diethyl O-(3,5,6-trichloro-2-pyridinyl) phosphorothioate	2921-88-2	Kale	Brassica oleracea var. Sabellica	USA	Leaves	O	F	2.21	2.21	2.21	Antonious G.F.; Turley E.T.; Abubakari M.; Snyder J.C. Dissipation, half-lives, and mass spectrometric identification of chlorpyrifos and its two metabolites on field-grown collard and kale. Journal of Environmental Science and Health, Part B, 2017, 52(4), 251-255.
154	Chlorpyrifos	O,O-diethyl O-(3,5,6-trichloro-2-pyridinyl) phosphorothioate	2921-88-2	Kentucky bluegrass	Poa Pratensis L.	Canada	Thatch & roots	I	F	11.8	11.8	11.8	Sears M.K.; Bowhey C.; Braun H.; Stephenson G.R. Dislodgeable residues and persistence of diazinon, chlorpyrifos and isofenphos following their application to turfgrass. Pesticide Science, 1987, 20(3), 223-231.
154	Chlorpyrifos	O,O-diethyl O-(3,5,6-trichloro-2-pyridinyl) phosphorothioate	2921-88-2	Kentucky bluegrass	Poa Pratensis L.	Canada	Blades	O	F	1.98	1.98	1.98	Sears M.K.; Bowhey C.; Braun H.; Stephenson G.R. Dislodgeable residues and persistence of diazinon, chlorpyrifos and isofenphos following their application to turfgrass. Pesticide Science, 1987, 20(3), 223-231.
154	Chlorpyrifos	O,O-diethyl O-(3,5,6-trichloro-2-pyridinyl) phosphorothioate	2921-88-2	Kentucky bluegrass	Poa Pratensis L.	IA, USA	Thatch & blades	O	F	6	12	10	Horst G.L.; Shea P J.; Christians N.; Miller D.R.; Stuefer-Powell C.; Starrett S.K. Pesticide dissipation under golf course fairway conditions. Crop Science, 1996, 36(2), 362-370.
154	Chlorpyrifos	O,O-diethyl O-(3,5,6-trichloro-2-pyridinyl) phosphorothioate	2921-88-2	Kentucky bluegrass	Poa Pratensis L.	KS, USA	Blades	I	F	6.5	8.2	7.35	Starrett S.K.; Christians N.E.; Austin T.A. Movement of pesticides under two irrigation regimes applied to turfgrass. Journal of Environmental Quality, 1996, 25(3), 566-571.
154	Chlorpyrifos	O,O-diethyl O-(3,5,6-trichloro-2-pyridinyl) phosphorothioate	2921-88-2	Lettuce	Lactuca sativa spp.	China	Whole plant	I	U	3.92	3.92	3.92	Lu M.X.; Jiang W.W.; Wang J.L.; Jian Q.; Shen Y.; Liu X.J.; Yu X.Y. Persistence and dissipation of chlorpyrifos in brassica chinensis, lettuce, celery, asparagus lettuce, eggplant, and pepper in a greenhouse. PLOSone, 2014, 9(6), e100556
154	Chlorpyrifos	O,O-diethyl O-(3,5,6-trichloro-2-pyridinyl) phosphorothioate	2921-88-2	Lettuce (summer)	Lactuca sativa	China	Leaves	I	F	1.1	1.9	1.45	Fan S.; Deng K.; Yu C.; Zhao P.; Bai A.; Li Y.; Pan C.; Li X. Influence of different planting seasons of six leaf vegetables on residues of five pesticides. Journal of Agricultural and Food Chemistry, 2013, 61(38), 9036-9044.
154	Chlorpyrifos	O,O-diethyl O-(3,5,6-trichloro-2-pyridinyl) phosphorothioate	2921-88-2	Lettuce (autumn)	Lactuca sativa	China	Leaves	I	F	2.1	3.9	3	Fan S.; Deng K.; Yu C.; Zhao P.; Bai A.; Li Y.; Pan C.; Li X. Influence of different planting seasons of six leaf vegetables on residues of five pesticides. Journal of Agricultural and Food Chemistry, 2013, 61(38), 9036-9044.
154	Chlorpyrifos	O,O-diethyl O-(3,5,6-trichloro-2-pyridinyl) phosphorothioate	2921-88-2	Lettuce	Lactuca sativa cv. Red Lollo Rosa	Republic of Korea	Leaves	I	F	8	8.7	8.35	Hwang J.I.; Lee S.E.; Kim J.E. Comparison of theoretical and experimental values for plant uptake of pesticide from soil. PloS one, 2017, 12(2), e0172254.
154	Chlorpyrifos	O,O-diethyl O-(3,5,6-trichloro-2-pyridinyl) phosphorothioate	2921-88-2	Maize	Zea mays L.	USA	Leaves	O	F	1	1	1	Wauchope R.D.; Young J.R.; Chalfant R.B.; Marti L.R.; Sumner H.R. Deposition, mobility and persistence of sprinkler-irrigation-applied chlorpyrifos on corn foliage and in soil. Pest Management Science, 1991, 32(2), 235-243.
154	Chlorpyrifos	O,O-diethyl O-(3,5,6-trichloro-2-pyridinyl) phosphorothioate	2921-88-2	Maize	Zea mays L.	GA, USA	Leaves	I	F	4	4	4	Willis G.H.; McDowell L.L. Pesticide persistence on foliage. Reviews of Environmental Contamination and Toxicology, 1987, 100, 23-73.
154	Chlorpyrifos	O,O-diethyl O-(3,5,6-trichloro-2-pyridinyl) phosphorothioate	2921-88-2	Okra	Abelmoschus esculentus var. Varsha Uphaar	India	Fruit	I	F	3.15	3.46	3.31	Chauhan R.; Kumari B. Persistence and Effect of Processing on Reduction of Chlorpyriphos Residues in Okra Fruits. Bulletin of Environmental Contamination and Toxicology, 2011, 87(2), 198-201.
154	Chlorpyrifos	O,O-diethyl O-(3,5,6-trichloro-2-pyridinyl) phosphorothioate	2921-88-2	Okra	Abelmoschus esculentus L.	India	Fruit	I	F	4.52	4.52	4.52	Waghulde P.N.; Khatik M.K.; Patil V.T.; Patil P.R. Persistence and Dissipation of Pesticides in Chilly and Okra at North Maharashtra Region. Pesticide Research Journal, 2011, 23(1), 23-26.
154	Chlorpyrifos	O,O-diethyl O-(3,5,6-trichloro-2-pyridinyl) phosphorothioate	2921-88-2	Onion	Allium cepa L.	India	Bulb	I	F	2	2	2	Srinivas S.P.; Banerjee K.; Jadhav M.R.; Ghaste M.S.; Lawande K.E. Bioefficacy, dissipation kinetics and safety evaluation of selected insecticides in Allium cepa L. Journal of Environmental Science and Health, 2012, 47(7), 700-709.
154	Chlorpyrifos	O,O-diethyl O-(3,5,6-trichloro-2-pyridinyl) phosphorothioate	2921-88-2	Orange	Citrus x sinensis cv. Navelina	Italy	Leaves	I	F	6.6	6.7	6.65	Montemurro N.; Grieco F.; Lacertosa G.; Visconti A. Chlorpyrifos decline curves and residue levels from different commercial formulations applied to oranges. Journal of Agricultural and Food Chemistry, 2002, 50(21), 5975-5980.
154	Chlorpyrifos	O,O-diethyl O-(3,5,6-trichloro-2-pyridinyl) phosphorothioate	2921-88-2	Orange	Citrus x sinensis cv. Valencia	Italy	Fruit	I	F	8	13	10.5	Angioni A.; Dedola F.; Garau A.; Sarais G.; Cabras P.; Caboni P. Chlorpyrifos residues levels in fruits and vegetables after field treatment. Journal of Environmental Science and Health, 2011, 46(6), 544-549.
154	Chlorpyrifos	O,O-diethyl O-(3,5,6-trichloro-2-pyridinyl) phosphorothioate	2921-88-2	Orange	Citrus x sinensis cv. Washington Navel	California, USA	Fruit	I	F	9.2	9.2	9.2	Iwata, Y.; Walker, G.P.; O'neal, J.R.; Barkley, J.H. Residues of acephate, amitraz, chlorpyrifos and formetanate hydrochloride on and in fruits after low-volume applications to orange trees. Pesticide Science, 1985, 16(2), 172-178.
154	Chlorpyrifos	O,O-diethyl O-(3,5,6-trichloro-2-pyridinyl) phosphorothioate	2921-88-2	Oilseed rape (summer)	Brassica napus	China	Leaves	I	F	1.3	2.5	1.9	Fan S.; Deng K.; Yu C.; Zhao P.; Bai A.; Li Y.; Pan C.; Li X. Influence of different planting seasons of six leaf vegetables on residues of five pesticides. Journal of Agricultural and Food Chemistry, 2013, 61(38), 9036-9044.
154	Chlorpyrifos	O,O-diethyl O-(3,5,6-trichloro-2-pyridinyl) phosphorothioate	2921-88-2	Oilseed rape (autumn)	Brassica napus	China	Leaves	I	F	3.4	4.8	4.1	Fan S.; Deng K.; Yu C.; Zhao P.; Bai A.; Li Y.; Pan C.; Li X. Influence of different planting seasons of six leaf vegetables on residues of five pesticides. Journal of Agricultural and Food Chemistry, 2013, 61(38), 9036-9044.
154	Chlorpyrifos	O,O-diethyl O-(3,5,6-trichloro-2-pyridinyl) phosphorothioate	2921-88-2	Pakchoi (summer)	Brassica rapa subsp. chinensis	China	Leaves	I	F	1.4	2.9	2.15	Fan S.; Deng K.; Yu C.; Zhao P.; Bai A.; Li Y.; Pan C.; Li X. Influence of different planting seasons of six leaf vegetables on residues of five pesticides. Journal of Agricultural and Food Chemistry, 2013, 61(38), 9036-9044.
154	Chlorpyrifos	O,O-diethyl O-(3,5,6-trichloro-2-pyridinyl) phosphorothioate	2921-88-2	Pakchoi (autumn)	Brassica rapa subsp. chinensis	China	Leaves	I	F	1.5	6.1	3.8	Fan S.; Deng K.; Yu C.; Zhao P.; Bai A.; Li Y.; Pan C.; Li X. Influence of different planting seasons of six leaf vegetables on residues of five pesticides. Journal of Agricultural and Food Chemistry, 2013, 61(38), 9036-9044.
154	Chlorpyrifos	O,O-diethyl O-(3,5,6-trichloro-2-pyridinyl) phosphorothioate	2921-88-2	Peach	Prunus persica	Pakistan	Fruit	O	F	3.62	5.19	4.41	Khan B.A. Studies on the Residues of Commonly Used Insecticides on Fruits and Vegetables Grown in NWFP-Pakistan. Department of Agricultural Chemistry. NWFP Agricultural University Peshawar, Pakistan, 2005, p. 193.
154	Chlorpyrifos	O,O-diethyl O-(3,5,6-trichloro-2-pyridinyl) phosphorothioate	2921-88-2	Peach	Prunus persica cv. Suncrest	Italy	Fruit	I	F	9.1	14	11.55	Angioni A.; Dedola F.; Garau A.; Sarais G.; Cabras P.; Caboni P. Chlorpyrifos residues levels in fruits and vegetables after field treatment. Journal of Environmental Science and Health, 2011, 46(6), 544-549.
154	Chlorpyrifos	O,O-diethyl O-(3,5,6-trichloro-2-pyridinyl) phosphorothioate	2921-88-2	Peanut	Arachis hypogaea	India	Stalk	I	F	2.75	2.86	2.81	Reddy A.R.; Divakar B.J. Estimation and dissipation of bifenthrin and chlorpyriphos residues from groundnut stalk and seed. Pestology, 2007, 31, 13-15.
154	Chlorpyrifos	O,O-diethyl O-(3,5,6-trichloro-2-pyridinyl) phosphorothioate	2921-88-2	Peanut	Arachis hypogaea	China	Nut	I	F	12.9	12.9	12.9	Chen B.-K.; Wan L.; Wu C.-X.; Gao L.-M.; Wang G.-C. Residue and Dynamic Degradation Studies of Chlorpyrifos in Peanut and Soil. Modern Agrochemicals, 2008, 7(4), 45-48.
154	Chlorpyrifos	O,O-diethyl O-(3,5,6-trichloro-2-pyridinyl) phosphorothioate	2921-88-2	Pepper	Capsicum annuim spp.	Saudi Arabia	Fruit	O	U	3.9	3.9	3.9	Al-Eed M.A. Determination of Pirimiphos-Methyl and Chlorpyrifos-Ethyl Residues on Tomato and Pepper Fruits Grown in Greenhouse. Journal of Applied Sciences, 2006, 6(4), 979-982.
154	Chlorpyrifos	O,O-diethyl O-(3,5,6-trichloro-2-pyridinyl) phosphorothioate	2921-88-2	Pepper	Capsicum annuum spp.	China	Whole plant	I	U	2.64	2.64	2.64	Lu M.X.; Jiang W.W.; Wang J.L.; Jian Q.; Shen Y.; Liu X.J.; Yu X.Y. Persistence and dissipation of chlorpyrifos in brassica chinensis, lettuce, celery, asparagus lettuce, eggplant, and pepper in a greenhouse. PLOSone, 2014, 9(6), e100556
154	Chlorpyrifos	O,O-diethyl O-(3,5,6-trichloro-2-pyridinyl) phosphorothioate	2921-88-2	Pepper (chilli)	Capsicum annuum L.	India	Fruit	I	F	3.22	3.22	3.22	Waghulde, P.N., Khatik, M.K., Patil, V.T., Patil, P.R., 2011. Persistence and Dissipation of Pesticides in Chilly and Okra at North Maharashtra Region. Pesticide Research Journal 23(1): 23-26.
154	Chlorpyrifos	O,O-diethyl O-(3,5,6-trichloro-2-pyridinyl) phosphorothioate	2921-88-2	Pepper (chilli)	Capsicum annuum L.	China	Fruit	I	F	3.99	4.78	4.4	Wu H.; Li B.-Q.; Lin Q.-F.; Huang H.; Ou J.-F.; Liu G.-Q. The Residue Dynamic of Chlorpyrifos in Carob, Chili and Soil. Agrochemicals, 2007, 46(11), 767-769,778.
154	Chlorpyrifos	O,O-diethyl O-(3,5,6-trichloro-2-pyridinyl) phosphorothioate	2921-88-2	Pepper (chilli)	Capsicum annuum L.	India	Fruit	I	F	9.9	9.9	9.9	Mahalingappa P.B.; Reddy K.D.; Reddy K.N.; Subbaratnam G.V. Dissipation of Ethion and Chlorpyriphos Residues in/on Chilli (Capsicum Annum L.). Pesticide Research Journal, 2006, 18(1), 72-73.
154	Chlorpyrifos	O,O-diethyl O-(3,5,6-trichloro-2-pyridinyl) phosphorothioate	2921-88-2	Potato	Solanum tuberosum	Columbia	Tuber	I	F	17	17	17	Juraske R.; Vivas C.S.M.; Velsquez A.E.; Santos G.G.; Moreno M.B.B.; Gomez J.D.; Binder C.R.; Hellweg S.; Dallos J.A.G. Pesticide uptake in potatoes: Model and field experiments. Environmental Science and Technology, 2011, 45(2), 651-657.
154	Chlorpyrifos	O,O-diethyl O-(3,5,6-trichloro-2-pyridinyl) phosphorothioate	2921-88-2	Rice	Oryza sativa	China	Grain	O	F	0.67	0.67	0.67	Huang B. Study on Penetration Effect of Chlorpyrifos in Rice. Pesticides, 2000, 39(11), 23-25.
154	Chlorpyrifos	O,O-diethyl O-(3,5,6-trichloro-2-pyridinyl) phosphorothioate	2921-88-2	Rice	Oryza sativa	China	Whole plant	I	F	4.28	4.28	4.28	Zhang X.; Shen Y.; Yu X.Y.; Liu X.J. Dissipation of chlorpyrifos and residue analysis in rice, soil and water under paddy field conditions. Ecotoxicology and Environmental Safety, 2012, 78, 276-280.
154	Chlorpyrifos	O,O-diethyl O-(3,5,6-trichloro-2-pyridinyl) phosphorothioate	2921-88-2	Rose	Rosa damascena Mill.	India	Flowers	I	F	3.1	3.1	3.1	Kumar A.; Nadda G.; Shanker A. Determination of chlorpyrifos 20% EC (Dursban 20 EC) in scented rose and its products. Journal of Chromatography A, 2004, 1050(2), 193-199.
154	Chlorpyrifos	O,O-diethyl O-(3,5,6-trichloro-2-pyridinyl) phosphorothioate	2921-88-2	Rose	Rosa damascena Mill.	India	Leaves	I	F	3.4	3.4	3.4	Kumar A.; Nadda G.; Shanker A. Determination of chlorpyrifos 20% EC (Dursban 20 EC) in scented rose and its products. Journal of Chromatography A, 2004, 1050(2), 193-199.
154	Chlorpyrifos	O,O-diethyl O-(3,5,6-trichloro-2-pyridinyl) phosphorothioate	2921-88-2	Royal palm	Roystonea regia	China	Heart	I	F	1.65	1.65	1.65	Liu X.-q.; Liu C.-l.; Weng Q.-f. Detection of Chlorpyrifos Residue and Dynamic Degradation in Royal Palm. Agrochemicals, 2010, 49(3), 186-193.
154	Chlorpyrifos	O,O-diethyl O-(3,5,6-trichloro-2-pyridinyl) phosphorothioate	2921-88-2	Spinach	Spinacia oleracea	China	Leaves	I	F	3.95	4.61	4.28	Chen Z.-D.; Feng M.-X.; Yuan Y.-W.; Chen Y.-l.; Lian Z.-X. Research on residue dynamics laden in some commonly used pesticides in spinach. Journal of Safety and Environment, 2007, 7(3), 1-4.
154	Chlorpyrifos	O,O-diethyl O-(3,5,6-trichloro-2-pyridinyl) phosphorothioate	2921-88-2	Spinach	Spinacia oleracea	China	Leaves	I	U	11.78	11.78	11.78	Du H.-Y.; Zhang Q.; Ma L. Dynamic Study on Residue of Chlorpirifos in Four Kinds of Vegetables in Greenhouse. Shandong Agricultural Sciences, 2009, (10), 58-61.
154	Chlorpyrifos	O,O-diethyl O-(3,5,6-trichloro-2-pyridinyl) phosphorothioate	2921-88-2	Spinach	Spinacia oleracea	China	Leaves	I	F	1.2	1.2	1.2	Fan S.; Deng K.; Yu C.; Zhao P.; Bai A.; Li Y.; Pan C.; Li X. Influence of different planting seasons of six leaf vegetables on residues of five pesticides. Journal of Agricultural and Food Chemistry, 2013, 61(38), 9036-9044.
154	Chlorpyrifos	O,O-diethyl O-(3,5,6-trichloro-2-pyridinyl) phosphorothioate	2921-88-2	Spinach	Spinacia oleracea	China	Leaves	I	F	4.8	8.8	6.8	Fan S.; Deng K.; Yu C.; Zhao P.; Bai A.; Li Y.; Pan C.; Li X. Influence of different planting seasons of six leaf vegetables on residues of five pesticides. Journal of Agricultural and Food Chemistry, 2013, 61(38), 9036-9044.
154	Chlorpyrifos	O,O-diethyl O-(3,5,6-trichloro-2-pyridinyl) phosphorothioate	2921-88-2	Sweetcorn	Zea mays L. var. rugosa	China	Fruit	I	F	4.02	7.31	5.67	Wang P.; Rashid M.; Liu J.; Hu M.; Zhong G. Identification of multi-insecticide residues using GC-NPD and the degradation kinetics of chlorpyrifos in sweet corn and soils. Food Chemistry, 2016, 212, 420-426.
154	Chlorpyrifos	O,O-diethyl O-(3,5,6-trichloro-2-pyridinyl) phosphorothioate	2921-88-2	Tomato	Lycopersicon esculentum Mill.	Saudi Arabia	Fruit	O	U	2.5	2.5	2.5	Al-Eed M.A. Determination of Pirimiphos-Methyl and Chlorpyrifos-Ethyl Residues on Tomato and Pepper Fruits Grown in Greenhouse. Journal of Applied Sciences, 2006, 6(4), 979-982.
154	Chlorpyrifos	O,O-diethyl O-(3,5,6-trichloro-2-pyridinyl) phosphorothioate	2921-88-2	Tomato	Lycopersicon esculentum Mill. cv. Daniela	Spain	Fruit	I	U	4.1	4.27	4.19	Martínez Vidal J.L.; Egea González F.J.; Martínez Galera M.; Castro Cano M.L. Diminution of Chlorpyrifos and Chlorpyrifos Oxon in Tomatoes and Green Beans Grown in Greenhouses. Journal of Agricultural and Food Chemistry, 1998, 46(4), 1440-1444.
154	Chlorpyrifos	O,O-diethyl O-(3,5,6-trichloro-2-pyridinyl) phosphorothioate	2921-88-2	Tomato	Lycopersicon esculentum Mill.	India	Fruit	I	F	2.9	3.3	3.1	Gupta S.; Gajbhiye V.T.; Sharma R.K.; Gupta R.K. Dissipation of cypermethrin, chlorpyriphos, and profenofos in tomato fruits and soil following application of pre-mix formulations. Environmental Monitoring and Assessment, 2011, 174(1-4), 337-345.
154	Chlorpyrifos	O,O-diethyl O-(3,5,6-trichloro-2-pyridinyl) phosphorothioate	2921-88-2	Tomato	Lycopersicon esculentum Mill. cv. Voriant	Italy	Fruit	I	F	6.9	9.1	8	Angioni A.; Dedola F.; Garau A.; Sarais G.; Cabras P.; Caboni P. Chlorpyrifos residues levels in fruits and vegetables after field treatment. Journal of Environmental Science and Health, 2011, 46(6), 544-549.
154	Chlorpyrifos	O,O-diethyl O-(3,5,6-trichloro-2-pyridinyl) phosphorothioate	2921-88-2	Tomato	Lycopersicon esculentum Mill.	China	Leaves	I	U	8.14	8.14	8.14	Du H.-Y.; Zhang Q.; Ma L. Dynamic Study on Residue of Chlorpirifos in Four Kinds of Vegetables in Greenhouse. Shandong Agricultural Sciences, 2009, (10), 58-61.
154	Chlorpyrifos	O,O-diethyl O-(3,5,6-trichloro-2-pyridinyl) phosphorothioate	2921-88-2	Tomato	Lycopersicon esculentum Mill.	Egypt	Fruit	I	X (flood irrigated)	2.5	2.5	2.5	Ramadan G.; Shawir M.; El-Bakary A.; Abdelgaleil S. Dissipation of four insecticides in tomato fruit using high performance liquid chromatography and QuEChERS methodology. Chilean Journal of Agricultural Research, 2016, 76(1), 129-133
154	Chlorpyrifos	O,O-diethyl O-(3,5,6-trichloro-2-pyridinyl) phosphorothioate	2921-88-2	Turfgrass	*	*	Blades	I	F	5.7	8.6	7.15	Racke K.D. Environmental fate of chlorpyrifos. In Reviews of Environmental Contamination and Toxicology (pp. 1-150), 1993, Springer New York.
154	Chlorpyrifos	O,O-diethyl O-(3,5,6-trichloro-2-pyridinyl) phosphorothioate	2921-88-2	Turfgrass	*	NY, USA	Blades	I	F	8.6	10.6	9.6	Kuhr R.J.; Tashiro H. Distribution and persistence of chlorpyrifos and diazinon applied to turf. Bulletin of Environmental Contamination and Toxicology, 1978, 20(1), 652-656.
154	Chlorpyrifos	O,O-diethyl O-(3,5,6-trichloro-2-pyridinyl) phosphorothioate	2921-88-2	Turfgrass	*	USA	Blades	I	X (compost)	3.2	7.1	5.15	Lemmon C.R.; Pylypiw H.M. Degradation of diazinon, chlorpyrifos, isofenphos, and pendimethalin in grass and compost. Bulletin of Environmental Contamination and Toxicology, 1992, 48(3), 409-415.
154	Chlorpyrifos	O,O-diethyl O-(3,5,6-trichloro-2-pyridinyl) phosphorothioate	2921-88-2	Turfgrass	Mix of Poa pratensis, Lolium perenne & Festuca spp.	USA	Blades	I	X (composted)	4.36	4.36	4.36	Vandervoort C.; Zabik M.J.; Branham B.; Lickfeldt D.W. Fate of Selected Pesticides Applied to Turfgrass: Effect of Composting on Residues. Bulletin of Environmental Contamination and Toxicology, 1997, 58(1), 38-45.
155	Chlorpyrifos methyl	O,O-dimethyl O-(3,5,6-trichloro-2-pyridinyl) phosphorothioate	5598-13-0	Apple	Malus pumila var. Csányi Jonathan	Hungary	Fruit	I	F	0.64	4.69	2.67	Ambrus Á.; Lantos J. Evaluation of the Studies on Decline of Pesticide Residues. Journal of Agricultural and Food Chemistry, 2002, 50(17), 4846-4851.
155	Chlorpyrifos methyl	O,O-dimethyl O-(3,5,6-trichloro-2-pyridinyl) phosphorothioate	5598-13-0	Balsam fir	Abies balsamea	Canada	Needles	I	F	1	1	1	Willis G.H.; McDowell L.L. Pesticide persistence on foliage. Reviews of Environmental Contamination and Toxicology, 1987, 100, 23-73.
155	Chlorpyrifos methyl	O,O-dimethyl O-(3,5,6-trichloro-2-pyridinyl) phosphorothioate	5598-13-0	Bermuda grass	Cynodon dactylon	GA, USA	Leaves	O	F	2.4	2.4	2.4	Willis G.H.; McDowell L.L. Pesticide persistence on foliage. Reviews of Environmental Contamination and Toxicology, 1987, 100, 23-73.
155	Chlorpyrifos methyl	O,O-dimethyl O-(3,5,6-trichloro-2-pyridinyl) phosphorothioate	5598-13-0	Grape	Vitis vinifera L.	Italy	Fruit	I	F	1.28	1.28	1.28	Cabras P.; Angioni A. Pesticide Residues in Grapes, Wine, and Their Processing Products. Journal of Agricultural and Food Chemistry, 2000, 48(4), 967-973.
155	Chlorpyrifos methyl	O,O-dimethyl O-(3,5,6-trichloro-2-pyridinyl) phosphorothioate	5598-13-0	Ponderosa pine	Pinus ponderosa	California, USA	Bark	I	F	15	128	71.5	Page M. Degradation and persistence of gamma-HCH and chlorpyrifos-methyl in Ponderosa pine bark. Pesticide Science, 1983, 14(6), 571-575.
156	Chlorsulfuron	2-chloro-N-(((4-methoxy-6-methyl-1,3,5-triazin-2-yl)amino)carbonyl)benzenesulfonamide	64902-72-3	Rigid ryegrass	Lolium rigidum var. Gaudin, biotype SR4/84	*	Shoots	I	F	0.17	0.17	0.17	Cotterman J.C.; Saari L.L. Rapid metabolic inactivation is the basis for cross-resistance to chlorsulfuron in diclofop-methyl-resistant rigid ryegrass (Lolium rigidum) biotype SR4/84. Pesticide Biochemistry and Physiology, 1992, 43(3), 182-192.
156	Chlorsulfuron	2-chloro-N-(((4-methoxy-6-methyl-1,3,5-triazin-2-yl)amino)carbonyl)benzenesulfonamide	64902-72-3	Rigid ryegrass	Lolium rigidum var. Gaudin, biotype SR4/84	*	Root	I	F	0.54	0.54	0.54	Cotterman J.C.; Saari L.L. Rapid metabolic inactivation is the basis for cross-resistance to chlorsulfuron in diclofop-methyl-resistant rigid ryegrass (Lolium rigidum) biotype SR4/84. Pesticide Biochemistry and Physiology, 1992, 43(3), 182-192.
157	Chlorthal-dimethyl	dimethyl 2,3,5,6-tetrachloro-1,4-benzenedicarboxylate	1861-32-1	Kentucky bluegrass	Poa pratensis L.		Thatch & blades	I	F	37.8	37.8	37.8	Hurto K.A.; Turgeon A.J.; Cole M.A. Degradation of benefin and DCPA in thatch and soil from a Kentucky bluegrass (Poa pratensis) turf. Weed Science, 1979, 154-157.
159	Chlozolinate	ethyl 3-(3,5-dichlorophenyl)-5-methyl-2,4-dioxo-5-oxazolidinecarboxylate	84332-86-5	Grape (table)	Vitis vinifera var. Cardinal & Victoria	Greece	Fruit	I	F	8.66	15.4	12.03	Lentza-Rizos C.; Avramides E.J.; Argyropoulou A.; Papadimitriou V.; Kokkinaki K. Field Trials To Determine Residues of Chlozolinate in Table Grapes. Journal of Agricultural and Food Chemistry, 2000, 48(6), 2522-2527. Calculated.
159	Chlozolinate	ethyl 3-(3,5-dichlorophenyl)-5-methyl-2,4-dioxo-5-oxazolidinecarboxylate	84332-86-5	Tomato	Lycopersicon esculentum Mill. cv. Verome I & 81 TI UPM	Italy	Fruit	O	U	7.45	7.45	7.45	Cabras P.; Meloni M.; Pirisi F.M.; Cabitza F. Behavior of acylanilide and dicarboximidic fungicide residues on greenhouse tomatoes. Journal of Agricultural and Food Chemistry, 1985, 33(1), 86-89.
1136	Chromafenozide	3,4-dihydro-5-methyl-2H-1-benzopyran-6-carboxylic acid 2-(3,5-dimethylbenzoyl)-2-(1,1-dimethylethyl)hydrazide	143807-66-3	Strawberry	Fragaria x ananassa	Egypt	Fruit	I	F	3.53	4.07	3.8	Malhat F.; Badawy H.M.; Barakat D.A.; Saber A.N. Residues, dissipation and safety evaluation of chromafenozide in strawberry under open field conditions. Food Chemistry, 2014, 152, 18-22.
1136	Chromafenozide	3,4-dihydro-5-methyl-2H-1-benzopyran-6-carboxylic acid 2-(3,5-dimethylbenzoyl)-2-(1,1-dimethylethyl)hydrazide	143807-66-3	Tomato	Lycopersicon esculentum	Egypt	Fruit	O	F	3.5	3.5	3.5	Abdelraheem E.; Arief M.; Mohammad S.G.; Jiang W. Safety assessment of chromafenozide residue level with decline study on tomato in Egypt. Environmental Monitoring and Assessment, 2017, 189(4), 180.
165	Clodinafop-propargly	2-propynyl (2R)-2-(4-((5-chloro-3-fluoro-2-pyridinyl)oxy)phenoxy)propanoate	105512-06-9	Wheat	Triticum aestivum L.	China	Whole plant	I	F	0.67	1.24	0.96	Guan W.; Ma Y.; Zhang H. Dissipation of clodinafop-propargyl and its metabolite in wheat field ecosystem. Bulletin of Environmental Contamination and Toxicology, 2013, 90(6), 750-755.
169	Clopyralid	3,6-dichloro-2-pyridinecarboxylic acid	1702-17-6	Oilseed rape	Brassica napa	China	Leaves	I	F	3.66	4.83	4.25	Zhao P.; Wang L.; Chen L.; Pan C. Residue Dynamics of Clopyralid and Picloram in Rape Plant Rapeseed and Field Soil. Bulletin of Environmental Contamination and Toxicology, 2011, 86(1), 78-82.
169	Clopyralid	3,6-dichloro-2-pyridinecarboxylic acid	1702-17-6	Sugarbeet	Beta vulgaris subsp. vulgaris convar. vulgaris var. Altissima	China	Leaves	I	F	5.3	5.3	5.3	Zhao P.; Wang L.; Chen L.; Pan C. Residue Dynamics of Clopyralid and Picloram in Rape Plant Rapeseed and Field Soil. Bulletin of Environmental Contamination and Toxicology, 2011, 86(1), 78-82.
169	Clopyralid	3,6-dichloro-2-pyridinecarboxylic acid	1702-17-6	Turfgrass	Mix of Poa pratensis, Lolium perenne & Festuca spp.	USA	Blades	I	X (composted)	6.66	6.66	6.66	Vandervoort C.; Zabik M.J.; Branham B.; Lickfeldt D.W. Fate of Selected Pesticides Applied to Turfgrass: Effect of Composting on Residues. Bulletin of Environmental Contamination and Toxicology, 1997, 58(1), 38-45.
1153	Cloransulam-methyl	methyl 3-chloro-2-(((5-ethoxy-7-fluoro(1,2,4)triazolo(1,5-c)pyrimidin-2-yl)sulfonyl)amino)benzoate	147150-35-4	Soybean	Glycine max	China	Whole plant	I	F	0.21	0.56	0.39	Zhang Z.; Li M.; Feng M.; Zhu K.; Han L. Dissipation dynamics and final residues of cloransulam-methyl in soybean and soil. Environmental Monitoring and Assessment, 2016, 188(3), 1-11
171	Clothianidin	(C(E))-N-((2-chloro-5-thiazolyl)methyl)-N'-methyl-N'-nitroguanidine	210880-92-5	Garlic chives	Allium tuberosum	China	Whole plant	I	F	35.73	36.1	35.92	Zhang P.; He M.; Zhao Y.; Ren Y.; Wei Y.; Mu W.; Liu F. Dissipation dynamics of clothianidin and its control efficacy against Bradysia odoriphaga Yang and Zhang in Chinese chive ecosystems. Pest Management Science, 2015, 72(7), 1396–1404 .
171	Clothianidin	(C(E))-N-((2-chloro-5-thiazolyl)methyl)-N'-methyl-N'-nitroguanidine	210880-92-5	Tea	Camellia sinensis	India	Leaves	I	F	4.07	4.63	4.35	Chowdhury S.; Mukhopadhyay S.; Bhattacharyya A. Degradation Dynamics of the Insecticide: Clothianidin (Dantop 50 % WDG) in a Tea Field Ecosystem. Bulletin of Environmental Contamination and Toxicology, 2012, 89(2), 340-343.
171	Clothianidin	(C(E))-N-((2-chloro-5-thiazolyl)methyl)-N'-methyl-N'-nitroguanidine	210880-92-5	Tomato	Lycopersicon esculentum	China	Fruit	I	F	7	11.9	9.45	Li L.; Jiang G.; Liu C.; Liang H.; Sun D.; Li W. Clothianidin dissipation in tomato and soil, and distribution in tomato peel and flesh. Food Control, 2012, 25(1), 265-269.
177	Copper oxychloride	copper chloride hydroxide	1332-40-7	Potato	Solanum tuberosum var. Kufri Jyoti	India	Leaves	I	F	16.72	17.71	17.22	Kundu C.; Majumder S.; Bhattacharyya A. Persistence Behaviour of Cu-oxychloride 37.5% WDG in Potato. Pesticide Research Journal, 2010, 22(1), 73-76.
185	Cyanazine	2-((4-chloro-6-(ethylamino)-1,3,5-triazin-2-yl)amino)-2-methylpropanenitrile	21725-46-2	Russian wild ryegrass	Elymus junceus Fiscsh.	Canada	Blades	I	F	2.51	5.98	3.99	Cessna A.J.; Darwent A.L.; Moyer J.R.; Cole D.E. Dissipation of residues of MCPA and cyanazine in three forage grasses following post-emergence application as a mixture in the establishment year. Pesticide Science, 1994, 40(2), 127-132. Calculated
185	Cyanazine	2-((4-chloro-6-(ethylamino)-1,3,5-triazin-2-yl)amino)-2-methylpropanenitrile	21725-46-2	Smooth bromegrass	Bromus inermis Leyss.	Canada	Blades	I	F	2.51	5.98	3.99	Cessna A.J.; Darwent A.L.; Moyer J.R.; Cole D.E. Dissipation of residues of MCPA and cyanazine in three forage grasses following post-emergence application as a mixture in the establishment year. Pesticide Science, 1994, 40(2), 127-132. Calculated
185	Cyanazine	2-((4-chloro-6-(ethylamino)-1,3,5-triazin-2-yl)amino)-2-methylpropanenitrile	21725-46-2	Wheat grass	Agropyron intermedium (Host) Beauv.	Canada	Blades	I	F	2.51	5.98	3.99	Cessna A.J.; Darwent A.L.; Moyer J.R.; Cole D.E. Dissipation of residues of MCPA and cyanazine in three forage grasses following post-emergence application as a mixture in the establishment year. Pesticide Science, 1994, 40(2), 127-132. Calculated
1593	Cyanofenphos	O-(4-cyanophenyl) O-ethyl phenylphosphonothioate	13067-93-1	Green bean	Phaseolus vulgaris	Japan	Leaves	O	F	14	14	14	Willis G.H.; McDowell L.L. Pesticide persistence on foliage. Reviews of Environmental Contamination and Toxicology, 1987, 100, 23-73.
1023	Cyanophos	O-(4-cyanophenyl) O,O-dimethyl phosphorothioate	2636-26-2	Kidney bean	Phaseolus vulgaris	Japan	Leaves	I	F	0.54	0.54	0.54	Chiba M.; Kato S.; Yamamoto I. Metabolism of cyanox and surecide in bean plants and degradation in soil. Journal of Pesticide Science, 1976, 1, 179–191.
1662	Cyantraniliprole	3-bromo-1-(3-chloro-2-pyridinyl)-N-(4-cyano-2-methyl-6-((methylamino)carbonyl)phenyl)-1H-pyrazole-5-carboxamide	736994-63-1	Cucumber	Cucumis sativus L.	*	Fruit	I	*	2.2	2.2	2.2	Dong F.; Liu X.; Xu J.; Li J.; Li Y.; Shan W.; Song W.; Zheng Y. Determination of cyantraniliprole and its major metabolite residues in vegetable and soil using ultra-performance liquid chromatography/tandem mass spectrometry. Biomedical Chromatography, 2012, 26(3), 377-383.
1662	Cyantraniliprole	3-bromo-1-(3-chloro-2-pyridinyl)-N-(4-cyano-2-methyl-6-((methylamino)carbonyl)phenyl)-1H-pyrazole-5-carboxamide	736994-63-1	Maize	Zea mays	*	Straw	I	F	4.9	5.4	5.15	Dong F.; Liu X.; Xu J.; Li J.; Li Y.; Shan W.; Song W.; Zheng Y. Determination of cyantraniliprole and its major metabolite residues in vegetable and soil using ultra-performance liquid chromatography/tandem mass spectrometry. Biomedical Chromatography, 2012, 26(3), 377-383.
1662	Cyantraniliprole	3-bromo-1-(3-chloro-2-pyridinyl)-N-(4-cyano-2-methyl-6-((methylamino)carbonyl)phenyl)-1H-pyrazole-5-carboxamide	736994-63-1	Pakchoi	Brassica rapa subsp. chinensis	*	Head	I	F	2.9	6.4	4.7	Sun J.; Feng N.; Tang C.; Qin D. Determination of cyantraniliprole and its major metabolite residues in pakchoi and soil using ultra-performance liquid chromatography–tandem mass spectrometry. Bulletin of Environmental Contamination and Toxicology, 2012, 89(4), 845-852.
1662	Cyantraniliprole	3-bromo-1-(3-chloro-2-pyridinyl)-N-(4-cyano-2-methyl-6-((methylamino)carbonyl)phenyl)-1H-pyrazole-5-carboxamide	736994-63-1	Rice	Oryza sativa	China	Straw	I	F	3.2	6.3	4.6	Zhang C.; Hu X.; Zhao H.; Wu M.; He H.; Zhang C., ... Li Z. Residues of cyantraniliprole and its metabolite J9Z38 in rice field ecosystem. Chemosphere, 2013, 93(1), 190-195.
1662	Cyantraniliprole	3-bromo-1-(3-chloro-2-pyridinyl)-N-(4-cyano-2-methyl-6-((methylamino)carbonyl)phenyl)-1H-pyrazole-5-carboxamide	736994-63-1	Rice	Oryza sativa	China	Straw	I	F	3	5	4	Zhang J.-M.; Chai W.-G.; Wu Y.-L. Residues of chlorantraniliprole in rice field ecosystem. Chemosphere, 2012, 87(2), 132-136.
1662	Cyantraniliprole	3-bromo-1-(3-chloro-2-pyridinyl)-N-(4-cyano-2-methyl-6-((methylamino)carbonyl)phenyl)-1H-pyrazole-5-carboxamide	736994-63-1	Tomato	Lycopersicon esculentum Mill.	*	Fruit	I	*	2.8	2.8	2.8	Dong F.; Liu X.; Xu J.; Li J.; Li Y.; Shan W.; Song W.; Zheng Y. Determination of cyantraniliprole and its major metabolite residues in vegetable and soil using ultra-performance liquid chromatography/tandem mass spectrometry. Biomedical Chromatography, 2012, 26(3), 377-383.
186	Cyazofamid	4-chloro-2-cyano-N,N-dimethyl-5-(4-methylphenyl)-1H-imidazole-1-sulfonamide	120116-88-3	Tomato	Lycopersicon esculentum Mill.	China	Fruit	I	F	12.2	18.3	15.3	Xu Z.; Zhang C.; Yu J.; Zhang C.; Wu M.; He, H., ... Chen, L. Field investigations of dissipations and residues of cyazofamid in soil and tomato: risk assessment of human exposure to cyazofamid via tomato intake. Environmental Science and Pollution Research, 2016, 1-10.
186	Cyazofamid	4-chloro-2-cyano-N,N-dimethyl-5-(4-methylphenyl)-1H-imidazole-1-sulfonamide	120116-88-3	Turfgrass	nd	USA	Blades	I	F	3	19	11	Wiedmann J.L. Turfgrass dissipation of cyazofamid. In: Nett, M.T., Carleton, J.N., Massey, J.H. (Eds.). Turf Grass: Pesticide Exposure Assessment and Predictive Modeling Tools. American Chemical Society, Washington, D.C.,2009, 97-109.
1680	Cycloheximide	4-((2R)-2-((1S,3S,5S)-3,5-dimethyl-2-oxocyclohexyl)-2-hydroxyethyl)-2,6-piperidinedione	66-81-9	Cherry	Prunus avium	*	Fruit	I	F	0.98	1.26	1.12	Prescott G.C.; Emerson H.; Ford J.H. Pesticide Residues, Determination of Cycloheximide (Acti-dione) Residues in Cherries. Journal of Agricultural and Food Chemistry, 1956, 4(4), 343-345. Calculated.
3022	Cycloprate	hexadecyl cyclopropanecarboxylate	54460-46-7	Apple (dwarf)	Malus pumila Mill. var. Red Delicious	USA	Leaves	I	F	28	28	28	Quistad G.B.; Staiger L.E.; Schooley D.A. Environmental degradation of the miticide cycloprate. 2. Metabolism by apples and oranges. Journal of Agricultural and Food Chemistry, 1978, 26(1), 66-70.
3022	Cycloprate	hexadecyl cyclopropanecarboxylate	54460-46-7	Apple (dwarf)	Malus pumila Mill. var. Northern Spy	USA	Fruit	I	F	21	23	22	Quistad G.B.; Staiger L.E.; Schooley D.A. Environmental degradation of the miticide cycloprate. 2. Metabolism by apples and oranges. Journal of Agricultural and Food Chemistry, 1978, 26(1), 66-70.
3022	Cycloprate	hexadecyl cyclopropanecarboxylate	54460-46-7	Orange	Citrus x sinensis cv. Washington Navel	USA	Leaves	I	F	8	8	8	Quistad G.B.; Staiger L.E.; Schooley D.A. Environmental degradation of the miticide cycloprate. 2. Metabolism by apples and oranges. Journal of Agricultural and Food Chemistry, 1978, 26(1), 66-70.
3022	Cycloprate	hexadecyl cyclopropanecarboxylate	54460-46-7	Orange	Citrus x sinensis cv. Washington Navel	USA	Fruit	I	F	2	2	2	Quistad G.B.; Staiger L.E.; Schooley D.A. Environmental degradation of the miticide cycloprate. 2. Metabolism by apples and oranges. Journal of Agricultural and Food Chemistry, 1978, 26(1), 66-70.
1685	Cyenopyrafen	(1E)-2-cyano-2-(4-(1,1-dimethylethyl)phenyl)-1-(1,3,4-trimethyl-1H-pyrazol-5-yl)ethenyl 2,2-dimethylpropanoate	560121-52-0	Grape	Vitis vinifera	Republic of Korea	Fruit	I	X (rainshield)	7.99	7.99	7.99	Lee C.R.; Hong J.H.; Lim J.S.; Lee K.S. Residue Patterns of Azoxystrobin and Cyenopyrafen In Grape between Rainshield and Plastic House Conditions. The Korean Journal of Pesticide Science, 2011, 15(2), 97-103
1685	Cyenopyrafen	(1E)-2-cyano-2-(4-(1,1-dimethylethyl)phenyl)-1-(1,3,4-trimethyl-1H-pyrazol-5-yl)ethenyl 2,2-dimethylpropanoate	560121-52-0	Grape	Vitis vinifera	Republic of Korea	Fruit	I	U	12.65	12.65	12.65	Lee C.R.; Hong J.H.; Lim J.S.; Lee K.S. Residue Patterns of Azoxystrobin and Cyenopyrafen In Grape between Rainshield and Plastic House Conditions. The Korean Journal of Pesticide Science, 2011, 15(2), 97-103
191	Cyflufenamid	[N(Z)]-N-[[(cyclopropylmethoxy)amino][2,3-difluoro-6-(trifluoromethyl)phenyl]methylene]benzeneacetamide	180409-60-3	Squash	Cucurbita pepo ver refera	Egypt	Leaves	I	F	2.61	2.61	2.61	Shalaby A.A.A. Residual behavior of abamectin and cyflufenamid in squash plants. Annals of Agricultural Science, Moshtohor, 2016, 54(4), 955-960
191	Cyflufenamid	[N(Z)]-N-[[(cyclopropylmethoxy)amino][2,3-difluoro-6-(trifluoromethyl)phenyl]methylene]benzeneacetamide	180409-60-3	Squash	Cucurbita pepo ver refera	Egypt	Peel	I	F	0.55	0.55	0.44	Shalaby A.A.A. Residual behavior of abamectin and cyflufenamid in squash plants. Annals of Agricultural Science, Moshtohor, 2016, 54(4), 955-960
191	Cyflufenamid	[N(Z)]-N-[[(cyclopropylmethoxy)amino][2,3-difluoro-6-(trifluoromethyl)phenyl]methylene]benzeneacetamide	180409-60-3	Squash	Cucurbita pepo ver refera	Egypt	Fruit	I	F	0.43	0.43	0.43	Shalaby A.A.A. Residual behavior of abamectin and cyflufenamid in squash plants. Annals of Agricultural Science, Moshtohor, 2016, 54(4), 955-960
192	Cyfluthrin	cyano(4-fluoro-3-phenoxyphenyl)methyl 3-(2,2-dichloroethenyl)-2,2-dimethylcyclopropanecarboxylate	68359-37-5	Cabbage	Brassica oleracea capitata var. Golden Acre	India	Head	I	F	0.86	2.79	1.83	Borah S.; Dikshit A.K.; Lal O.P.; Singh R.; Sinha S.R.; Srivastava Y.N. Evaluation of Beta-Cyfluthrin: Protection of Cole Crops, Dietary Intake, and Consumer Risk Assessment. Bulletin of Environmental Contamination and Toxicology, 2003, 70(6), 1136-1142
192	Cyfluthrin	cyano(4-fluoro-3-phenoxyphenyl)methyl 3-(2,2-dichloroethenyl)-2,2-dimethylcyclopropanecarboxylate	68359-37-5	Cabbage	Brassica oleracea	China	Leaves	I	F	5.3	6.5	5.9	Weiping N.; Zhuanxian G.; Residual Dynamics of Cyfluthrin in Cabbage and Soil. Pesticide Science and Administration, 2011, 9, 014.
192	Cyfluthrin	cyano(4-fluoro-3-phenoxyphenyl)methyl 3-(2,2-dichloroethenyl)-2,2-dimethylcyclopropanecarboxylate	68359-37-5	Cauliflower	Brassica oleracea botrytis var. Pusa Snowball	India	Leaves	I	F	1.47	1.91	1.69	Borah S.; Dikshit A.K.; Lal O.P.; Singh R.; Sinha S.R.; Srivastava Y.N. Evaluation of Beta-Cyfluthrin: Protection of Cole Crops, Dietary Intake, and Consumer Risk Assessment. Bulletin of Environmental Contamination and Toxicology, 2003, 70(6), 1136-1142
192	Cyfluthrin	cyano(4-fluoro-3-phenoxyphenyl)methyl 3-(2,2-dichloroethenyl)-2,2-dimethylcyclopropanecarboxylate	68359-37-5	Cauliflower	Brassica oleracea botrytis var. Pusa Snowball	India	Curd	I	F	1.91	2.66	2.29	Borah S.; Dikshit A.K.; Lal O.P.; Singh R.; Sinha S.R.; Srivastava Y.N. Evaluation of Beta-Cyfluthrin: Protection of Cole Crops, Dietary Intake, and Consumer Risk Assessment. Bulletin of Environmental Contamination and Toxicology, 2003, 70(6): 1136-1142
192	Cyfluthrin	cyano(4-fluoro-3-phenoxyphenyl)methyl 3-(2,2-dichloroethenyl)-2,2-dimethylcyclopropanecarboxylate	68359-37-5	Chickpea	Cicer arietinum	*	Fruit	O	F	3.34	4.01	3.68	Singh N.K.; Singh S.P. Dissipation of β-cyfluthrin Residues on Chickpea. Pesticide Research Journal, 2007, 19(1), 104-105.
192	Cyfluthrin	cyano(4-fluoro-3-phenoxyphenyl)methyl 3-(2,2-dichloroethenyl)-2,2-dimethylcyclopropanecarboxylate	68359-37-5	Eggplant	Solanum melongena var. Punjab Jamuni Gola	India	Fruit	I	F	1.39	1.56	1.48	Mandal K.; Chahil G.S.; Sahoo S.K.; Battu R.S.; Singh B. Dissipation Kinetics of β-Cyfluthrin and Imidacloprid in Brinjal and Soil Under Subtropical Conditions of Punjab, India. Bulletin of Environmental Contamination and Toxicology, 2010, 84(2), 225
192	Cyfluthrin	cyano(4-fluoro-3-phenoxyphenyl)methyl 3-(2,2-dichloroethenyl)-2,2-dimethylcyclopropanecarboxylate	68359-37-5	Eggplant	Solanum melongena L.	*	Fruit	I	F	1.56	2.41	1.99	Banerjee T.; Banerjee D.; Roy S.; Banerjee H.; Pal S. A Comparative Study on the Persistence of Imidacloprid and Beta-Cyfluthrin in Vegetables. Bulletin of Environmental Contamination and Toxicology, 2012, 89(1), 193-196.
192	Cyfluthrin	cyano(4-fluoro-3-phenoxyphenyl)methyl 3-(2,2-dichloroethenyl)-2,2-dimethylcyclopropanecarboxylate	68359-37-5	Eggplant	Solanum melongena L.	India	Fruit	I	F	4.65	4.8	4.73	Sinha S.; Gopal M. Evaluating the Safety of β-Cyfluthrin Insecticide for Usage in Eggplant (Solanum melongena L.) Crop. Bulletin of Environmental Contamination and Toxicology, 2002, 68(3), 400-405.
192	Cyfluthrin	cyano(4-fluoro-3-phenoxyphenyl)methyl 3-(2,2-dichloroethenyl)-2,2-dimethylcyclopropanecarboxylate	68359-37-5	Green bean	Phaseolus vulgaris	Spain	Fruit	I	U	0.15	0.92	0.54	Martinez Galera M.; Gil Garcia M.D.; Rodriguez Lallena J.A.; Lopez Lopez T.; Martinez Vidal J.L. Dissipation of pyrethroid residues in peppers, zucchinis, and green beans exposed to field treatments in greenhouses: evaluation by decline curves. Journal of Agricultural and Food Chemistry, 2003, 51(19), 5745-5751.
192	Cyfluthrin	cyano(4-fluoro-3-phenoxyphenyl)methyl 3-(2,2-dichloroethenyl)-2,2-dimethylcyclopropanecarboxylate	68359-37-5	Lettuce	Lactuca sativa L. var. Iceberg	Italy	Head	O	F	1.6	4.3	2.95	Cabizza M.; Satta M.; Falconi S.; Onano M.; Uccheddu G. Degradation of cyprodinil, fludioxonil, cyfluthrin and pymetrozine on lettuce after different application methods. Journal of Environmental Science and Health, 2007, 42(7), 761-766.
192	Cyfluthrin	cyano(4-fluoro-3-phenoxyphenyl)methyl 3-(2,2-dichloroethenyl)-2,2-dimethylcyclopropanecarboxylate	68359-37-5	Lettuce	Lactuca sativa L. var. Romaine	Italy	Head	O	F	3.1	3.9	3.5	Cabizza M.; Satta M.; Falconi S.; Onano M.; Uccheddu G. Degradation of cyprodinil, fludioxonil, cyfluthrin and pymetrozine on lettuce after different application methods. Journal of Environmental Science and Health, 2007, 42(7), 761-766.
192	Cyfluthrin	cyano(4-fluoro-3-phenoxyphenyl)methyl 3-(2,2-dichloroethenyl)-2,2-dimethylcyclopropanecarboxylate	68359-37-5	Mango	Mangifera indica L.	India	Fruit	I	F	2.4	2.6	2.5	Mohapatra S.; Deepa M.; Jagadish G.K. Behavior of Beta Cyfluthrin and Imidacloprid in/on Mango (Mangifera indica L.). Bulletin of Environmental Contamination and Toxicology, 2011, 87(2), 202-207.
192	Cyfluthrin	cyano(4-fluoro-3-phenoxyphenyl)methyl 3-(2,2-dichloroethenyl)-2,2-dimethylcyclopropanecarboxylate	68359-37-5	Mustard	Brassica juncea var. Pusa Bold	India	Leaves	I	F	4.2	5	4.6	Gopal M.; Mukherjee I.; Chander S. Behaviour of β-Cyfluthrin and Imidacloprid in Mustard Crop: Alternative Insecticide for Aphid Control. Bulletin of Environmental Contamination and Toxicology, 2002,68(3), 406-411.
192	Cyfluthrin	cyano(4-fluoro-3-phenoxyphenyl)methyl 3-(2,2-dichloroethenyl)-2,2-dimethylcyclopropanecarboxylate	68359-37-5	Okra	Abelmoschus esculentus	India	Fruit	I	F	0.68	0.91	0.8	Sahoo S.K.; Chahil G.S.; Mandal K.; Battu R.S.; Singh B. Estimation of β-cyfluthrin and imidacloprid in okra fruits and soil by chromatography techniques. Journal of Environmental Science and Health, 2012, 47(1), 42-50.
192	Cyfluthrin	cyano(4-fluoro-3-phenoxyphenyl)methyl 3-(2,2-dichloroethenyl)-2,2-dimethylcyclopropanecarboxylate	68359-37-5	Okra	Abelmoschus esculentus	*	Fruit	I	F	1.07	1.54	1.31	Banerjee T.; Banerjee D.; Roy S.; Banerjee H.; Pal S. A Comparative Study on the Persistence of Imidacloprid and Beta-Cyfluthrin in Vegetables. Bulletin of Environmental Contamination and Toxicology, 2012, 89(1), 193-196.
192	Cyfluthrin	cyano(4-fluoro-3-phenoxyphenyl)methyl 3-(2,2-dichloroethenyl)-2,2-dimethylcyclopropanecarboxylate	68359-37-5	Orange	Citrus x sinensis	California, USA	Leaves	O	F	11	32	21.5	Fredrickson A S. Dissipation of dislodgeable foliar Cyfluthrin residue, Worker H&S Report HS-1778, California Environmental Protection Agency. 1999, Grey literature
192	Cyfluthrin	cyano(4-fluoro-3-phenoxyphenyl)methyl 3-(2,2-dichloroethenyl)-2,2-dimethylcyclopropanecarboxylate	68359-37-5	Pepper	Capsicum spp.	Spain	Fruit	I	U	0.39	1.45	0.92	Martinez Galera M.; Gil Garcia M.D.; Rodriguez Lallena J.A.; Lopez Lopez T.; Martinez Vidal J.L. Dissipation of pyrethroid residues in peppers, zucchinis, and green beans exposed to field treatments in greenhouses: evaluation by decline curves. Journal of Agricultural and Food Chemistry, 2003, 51(19), 5745-5751.
192	Cyfluthrin	cyano(4-fluoro-3-phenoxyphenyl)methyl 3-(2,2-dichloroethenyl)-2,2-dimethylcyclopropanecarboxylate	68359-37-5	Tomato	Lycopersicon esculentum Mill.	India	Fruit	O	F	1.21	2.18	1.7	Dikshit A.K.; Pachauri D.C.; Jindal T. Maximum Residue Limit and Risk Assessment of Beta-Cyfluthrin and Imidacloprid on Tomato (Lycopersicon esculentum Mill). Bulletin of Environmental Contamination and Toxicology , 2003, 70(6), 1143-1150.
192	Cyfluthrin	cyano(4-fluoro-3-phenoxyphenyl)methyl 3-(2,2-dichloroethenyl)-2,2-dimethylcyclopropanecarboxylate	68359-37-5	Tomato	Lycopersicon esculentum Mill.	*	Fruit	I	F	1.4	1.61	1.51	Banerjee T.; Banerjee D.; Roy S.; Banerjee H.; Pal S. A Comparative Study on the Persistence of Imidacloprid and Beta-Cyfluthrin in Vegetables. Bulletin of Environmental Contamination and Toxicology, 2012, 89(1), 193-196.
192	Cyfluthrin	cyano(4-fluoro-3-phenoxyphenyl)methyl 3-(2,2-dichloroethenyl)-2,2-dimethylcyclopropanecarboxylate	68359-37-5	Zucchini	Cucurbita pepo var. Cylindrica	Spain	Fruit	I	U	1.42	1.42	1.42	Martinez Galera M.; Gil Garcia M.D.; Rodriguez Lallena J.A.; Lopez Lopez T.; Martinez Vidal J.L. Dissipation of pyrethroid residues in peppers, zucchinis, and green beans exposed to field treatments in greenhouses: evaluation by decline curves. Journal of Agricultural and Food Chemistry, 2003, 51(19), 5745-5751.
193	Cyhalofop-butyl	butyl (2R)-2-(4-(4-cyano-2-fluorophenoxy)phenoxy)propanoate	122008-85-9	Barnyard grass	Echinochloa crus-galli	AR, USA	Leaves	I	F	8.66	8.66	8.66	Ottis B.V.; Mattice J.D.; Talbert R.E. Determination of Antagonism between Cyhalofop-butyl and Other Rice (Oryza sativa) Herbicides in Barnyardgrass (Echinochloa crus-galli). Journal of Agricultural and Food Chemistry, 2005, 53(10), 4064-4068.
193	Cyhalofop-butyl	butyl (2R)-2-(4-(4-cyano-2-fluorophenoxy)phenoxy)propanoate	122008-85-9	Rice	Oryza sativa	*	Whole plant	I	F	2.05	2.05	2.05	Guo Z.-Y.; Huang F.; Xu Z. Residue Dynamics of 10% Fenoxaprop-P-Ethyl·Cyhalofop-Butyl EC in Rice. Journal of Ecology and Rural Environment, 2008, 24(1), 51-54.
193	Cyhalofop-butyl	butyl (2R)-2-(4-(4-cyano-2-fluorophenoxy)phenoxy)propanoate	122008-85-9	Rice	Oryza sativa	China	Whole plant	I	F	2.09	2.42	2.26	Wu J.; Wang K.; Zhang Y.; Zhang, H. Determination and study on dissipation and residue determination of cyhalofop-butyl and its metabolite using HPLC-MS/MS in a rice ecosystem. Environmental Monitoring and Assessment, 2014, 186(10), 6959-6967.
194	Cyhalothrin	cyano(3-phenoxyphenyl)methyl (1R,3R)-rel-3-((1Z)-2-chloro-3,3,3-trifluoro-1-propenyl)-2,2-dimethylcyclopropanecarboxylate	68085-85-8	Apple (dwarf)	Malus pumila Mill. cv. Jersey Mac	Canada	Leaves	O	F	1.78	19.86	10.82	Bostanian N.J.; Belanger A.; Boudreau F.; Mailloux G. Dissipation of cyhalothrin residues on apple foliage and apples at harvest. Journal of Agricultural and Food Chemistry, 1993, 41(2), 292-295.
194	Cyhalothrin	cyano(3-phenoxyphenyl)methyl (1R,3R)-rel-3-((1Z)-2-chloro-3,3,3-trifluoro-1-propenyl)-2,2-dimethylcyclopropanecarboxylate	68085-85-8	Cabbage (spring)	Brassica oleracea capitata	China	Head	I	F	1.6	1.6	1.6	Zhang Z.-Y.; Liu X.-J.; Yu X.-Y.; Zhang C.-Z.; Hon X.-Y. Pesticide residues in the spring cabbage (Brassica oleracea L. var. capitata) grown in open field. Food Control, 2007, 18(6), 723-730.
194	Cyhalothrin	cyano(3-phenoxyphenyl)methyl (1R,3R)-rel-3-((1Z)-2-chloro-3,3,3-trifluoro-1-propenyl)-2,2-dimethylcyclopropanecarboxylate	68085-85-8	Chickpea	Cicer aretinium L. var. Pusa 203.	India	Fruit	O	F	3.7	3.7	3.7	Mukherjee I.; Gopal M.; Mathur D.S. Behavior of β-Cyfluthrin after Foliar Application on Chickpea (Cicer aretinium L.) and Pigeon Pea (Cajanus cajan L.). Bulletin of Environmental Contamination and Toxicology, 2007, 78(1), 85-89.
194	Cyhalothrin	cyano(3-phenoxyphenyl)methyl (1R,3R)-rel-3-((1Z)-2-chloro-3,3,3-trifluoro-1-propenyl)-2,2-dimethylcyclopropanecarboxylate	68085-85-8	Chinese cabbage	Brassica rapa subsp. pekinensis chinensis L.	China	Leaves	I	F	2.9	2.9	2.9	Zhang Z.-Y.; Zhang C.-Z.; Liu X.-J.; Hong X.-Y. Dynamics of pesticide residues in the autumn Chinese cabbage (Brassica chinensis L.) grown in open fields. Pest Management Science, 2006, 62(4), 350-355.
194	Cyhalothrin	cyano(3-phenoxyphenyl)methyl (1R,3R)-rel-3-((1Z)-2-chloro-3,3,3-trifluoro-1-propenyl)-2,2-dimethylcyclopropanecarboxylate	68085-85-8	Lime	Citrus aurantifolia	India	Fruit	O	F	3.4	3.4	3.4	Mohapatra S.; Sharma D.; Rekha A. Residues of λ-Cyhalothrin in/on Acid Lime (Citrus aurantifolia). Pesticide Research Journal, 2006, 18(1), 74-75.
194	Cyhalothrin	cyano(3-phenoxyphenyl)methyl (1R,3R)-rel-3-((1Z)-2-chloro-3,3,3-trifluoro-1-propenyl)-2,2-dimethylcyclopropanecarboxylate	68085-85-8	Pigeon pea	Cajanus cajan L. var. Pusa 22	India	Fruit	O	F	4.3	5	4.65	Mukherjee I.; Gopal M.; Mathur D.S. Behavior of β-Cyfluthrin after Foliar Application on Chickpea (Cicer aretinium L.) and Pigeon Pea (Cajanus cajan L.). Bulletin of Environmental Contamination and Toxicology, 2007, 78(1), 85-89.
194	Cyhalothrin	cyano(3-phenoxyphenyl)methyl (1R,3R)-rel-3-((1Z)-2-chloro-3,3,3-trifluoro-1-propenyl)-2,2-dimethylcyclopropanecarboxylate	68085-85-8	Tea	Camellia sinensis cv. Oolong	China	Leaves	I	F	10.2	10.4	10.3	Chen L.; ShangGuan L.; Wu Y.; Xu L.; Fu F. Study on the residue and degradation of fluorine-containing pesticides in Oolong tea by using gas chromatography–mass spectrometry. Food Control, 2012, 25(2), 433-440.
194	Cyhalothrin	cyano(3-phenoxyphenyl)methyl (1R,3R)-rel-3-((1Z)-2-chloro-3,3,3-trifluoro-1-propenyl)-2,2-dimethylcyclopropanecarboxylate	68085-85-8	Tea	Camellia sinensis cv. Oolong	China	Leaves	O	F	3.4	3.4	3.4	Zongmao C.; Haibin W. Degradation of Pesticides on Plant Surfaces and its Prediction - A Case Study on Tea Plant. Environmental Monitoring and Assessment, 1997, 44(1-3), 303-313.
196	Cymoxanil	2-cyano-N-((ethylamino)carbonyl)-2-(methoxyimino)acetamide	57966-95-7	Potato	Solanum tuberosum var. Kufri Chandramukhi	India	Tuber	I	F	1.08	1.3	1.19	Roy S.; Alam S.; Chowdhury A. Dissipation of Curzate (Cymoxanil 8% + Mancozeb 64%) in Potato Tuber and Cropped Soil. Pesticide Research Journal, 2010, 22(1), 5-9.
197	Cypermethrin	cyano(3-phenoxyphenyl)methyl 3-(2,2-dichloroethenyl)-2,2-dimethylcyclopropanecarboxylate	52315-07-8	Cabbage	Brassica oleracea spp.	India	Head	I	F	1.97	2.25	2.11	Jaglan R.S.; Sircar P.; Dureja P. Persistence of some Synthetic Pyrethroids in/on Cabbage. Pesticide Research Journal, 1995, 7(2), 105-109.
197	Cypermethrin	cyano(3-phenoxyphenyl)methyl 3-(2,2-dichloroethenyl)-2,2-dimethylcyclopropanecarboxylate	52315-07-8	Cabbage (spring)	Brassica oleracea capitata	China	Head	I	F	2.3	2.6	2.45	Zhang Z.-Y.; Liu X.-J.; Yu X.-Y.; Zhang C.-Z.; Hon X.-Y. Pesticide residues in the spring cabbage (Brassica oleracea L. var. capitata) grown in open field. Food Control, 2007, 18(6), 723-730.
197	Cypermethrin	cyano(3-phenoxyphenyl)methyl 3-(2,2-dichloroethenyl)-2,2-dimethylcyclopropanecarboxylate	52315-07-8	Cabbage	Brassica oleracea spp.	Egypt	Leaves	O	F	13.1	13.1	13.1	El-Sebae A.H. Fate and undesirable effects of pesticides in Egypt. In: P. Bourdeau, J.A. Haines, W. Klein, Murti, C.R.K. (Eds.). Ecotoxicology and Climate. John Wiley and Sons, Chichester, 1989, 359-371.
197	Cypermethrin	cyano(3-phenoxyphenyl)methyl 3-(2,2-dichloroethenyl)-2,2-dimethylcyclopropanecarboxylate	52315-07-8	Cauliflower	Brassica oleracea botrytis	India	Curd	I	F	1.5	2.1	1.8	Gupta S.; Sharma R.K.; Gajbhiye V.T.; Gupta R.K. Persistence of insecticides in ready-mix formulations and their efficacy against Lipaphis erysimi (Kalt) in cauliflower. Environmental Monitoring and Assessment, 2012, 185(3), 2107-2114.
197	Cypermethrin	cyano(3-phenoxyphenyl)methyl 3-(2,2-dichloroethenyl)-2,2-dimethylcyclopropanecarboxylate	52315-07-8	Cauliflower	Brassica oleracea botrytis	Pakistan	Head	O	F	2.79	4.24	3.52	Khan B.A. Studies on the Residues of Commonly Used Insecticides on Fruits and Vegetables Grown in NWFP-Pakistan. Department of Agricultural Chemistry. NWFP Agricultural University Peshawar, Pakistan, 2005, 193.
197	Cypermethrin	cyano(3-phenoxyphenyl)methyl 3-(2,2-dichloroethenyl)-2,2-dimethylcyclopropanecarboxylate	52315-07-8	Chinese broccoli	Brassica oleracea alboglabra cv. Guy Lon	Canada	Leaves	O	F	2.5	2.5	2.5	Ripley B.D.; Ritcey G.M.; Harris C.R.; Denommé M.A.; Lissemore L.I. Comparative Persistence of Pesticides on Selected Cultivars of Specialty Vegetables. Journal of Agricultural and Food Chemistry, 2003, 51(5), 1328-1335.
197	Cypermethrin	cyano(3-phenoxyphenyl)methyl 3-(2,2-dichloroethenyl)-2,2-dimethylcyclopropanecarboxylate	52315-07-8	Chinese cabbage	Brassica rapa subsp. pekinensis	China	Leaves	I	F	2.9	3.5	3.2	Zhang Z.-Y.; Zhang C.-Z.; Liu X.-J.; Hong X.-Y. Dynamics of pesticide residues in the autumn Chinese cabbage (Brassica chinensis L.) grown in open fields. Pest Management Science, 2006, 62(4), 350-355.
197	Cypermethrin	cyano(3-phenoxyphenyl)methyl 3-(2,2-dichloroethenyl)-2,2-dimethylcyclopropanecarboxylate	52315-07-8	Chinese cabbage	Brassica rapa subsp. pekinensis	Canada	Leaves	I	F	4.9	4.9	4.9	Ripley B.D.; Ritcey G.M.; Harris C.R.; Denommé M.A.; Lissemore L.I. Comparative Persistence of Pesticides on Selected Cultivars of Specialty Vegetables. Journal of Agricultural and Food Chemistry, 2003, 51(5), 1328-1335.
197	Cypermethrin	cyano(3-phenoxyphenyl)methyl 3-(2,2-dichloroethenyl)-2,2-dimethylcyclopropanecarboxylate	52315-07-8	Cotton	Gossypium hirsutum L.	CA, USA	Leaves	I	F	7.9	7.9	7.9	Cole L.M.; Casida J.E.; Ruzo L.O. Comparative degradation of the pyrethroids tralomethrin, tralocythrin, deltamethrin, and cypermethrin on cotton and bean foliage. Journal of Agricultural and Food Chemistry, 1982, 30(5), 916-920.
197	Cypermethrin	cyano(3-phenoxyphenyl)methyl 3-(2,2-dichloroethenyl)-2,2-dimethylcyclopropanecarboxylate	52315-07-8	Cotton	Gossypium hirsutum L.	India	Leaves	I	F	0.69	0.71	0.7	Battu R.S.; Sahoo S.K.; Jyot G. Persistence of Acephate and Cypermethrin on Cotton Leaves, Cottonseed, Lint and Soil. Bulletin of Environmental Contamination and Toxicology, 2009, 82(1), 124-128.
197	Cypermethrin	cyano(3-phenoxyphenyl)methyl 3-(2,2-dichloroethenyl)-2,2-dimethylcyclopropanecarboxylate	52315-07-8	Cotton	Gossypium hirsutum L.	AZ, USA	Leaves	O	F	5.8	5.8	5.8	Estesen B.J.; Buck N.A.; Ware G.W. Dislodgeable insecticide residues on foliage: carbaryl, cypermethrin and methamidophos. Bulletin of Environmental Contamination and Toxicology, 1982, 28, 490-493.
197	Cypermethrin	cyano(3-phenoxyphenyl)methyl 3-(2,2-dichloroethenyl)-2,2-dimethylcyclopropanecarboxylate	52315-07-8	Cotton	Gossypium hirsutum L.	AZ, USA	Leaves	O	F	3.7	4.6	4.2	Ware G.W.; Buck N.A.; Estesen B.J. Dislodgeable insecticide residues on cotton foliage: Comparison of ULV/cottonseed oil vs. Aqueous dilutions of 12 insecticides. Bulletin of Environmental Contamination and Toxicology, 1983, 31(5), 551-558.
197	Cypermethrin	cyano(3-phenoxyphenyl)methyl 3-(2,2-dichloroethenyl)-2,2-dimethylcyclopropanecarboxylate	52315-07-8	Cowpea	Vigna unguiculata	Australia	Fruit	O	F	2.85	2.85	2.85	Soliman M.M.M. Persistence of New Insecticides and Their Efficacy Against Insect Pests of Cowpea. Australian Journal of Basic and Applied Sciences, 2011, 5(2), 82-89.
197	Cypermethrin	cyano(3-phenoxyphenyl)methyl 3-(2,2-dichloroethenyl)-2,2-dimethylcyclopropanecarboxylate	52315-07-8	Eggplant	Solanum melongena L. var. BR112	*	Fruit	I	F	1.16	1.18	1.17	Kaur P.; Yadav G.S.; Chauhan R.; Kumari B. Persistence of Cypermethrin and Decamethrin Residues in/on Brinjal Fruits. Bulletin of Environmental Contamination and Toxicology, 2011, 87(6), 693-698.
197	Cypermethrin	cyano(3-phenoxyphenyl)methyl 3-(2,2-dichloroethenyl)-2,2-dimethylcyclopropanecarboxylate	52315-07-8	Eggplant	Solanum melongena	India	Fruit	O	F	1.88	1.88	1.88	Walia S.; Boora P.; Kumari B. Effect of Processing on Dislodging of Cypermethrin Residues on Brinjal. Bulletin of Environmental Contamination and Toxicology, 2010, 84(4), 465-468.
197	Cypermethrin	cyano(3-phenoxyphenyl)methyl 3-(2,2-dichloroethenyl)-2,2-dimethylcyclopropanecarboxylate	52315-07-8	Eggplant	Solanum melongena	India	Fruit	I	F	2.15	3.27	2.48	Mukherjee I.; Kumar A.; Kumar A. Persistence Behavior of Combination Mix Crop Protection Agents in/on Eggplant Fruits. Bulletin of Environmental Contamination and Toxicology, 2012, 88(3), 338-343.
197	Cypermethrin	cyano(3-phenoxyphenyl)methyl 3-(2,2-dichloroethenyl)-2,2-dimethylcyclopropanecarboxylate	52315-07-8	Eggplant	Solanum melongena L.	India	Fruit	I	F	2.2	2.9	2.55	Sinha S.; Gopal M. Evaluating the Safety of β-Cyfluthrin Insecticide for Usage in Eggplant (Solanum melongena L.) Crop. Bulletin of Environmental Contamination and Toxicology, 2002, 68(3), 400-405.
197	Cypermethrin	cyano(3-phenoxyphenyl)methyl 3-(2,2-dichloroethenyl)-2,2-dimethylcyclopropanecarboxylate	52315-07-8	Elm	Ulmus americana	Canada	Bark	I	F	1.6	12	6.8	Jin H.; Webster B.G.R. Persistence, Penetration, and Surface Availability of Cypermethrin and Its Major Degradation Products in Elm Bark. Journal of Agricultural and Food Chemistry, 1998, 46(7), 2851-2857.
197	Cypermethrin	cyano(3-phenoxyphenyl)methyl 3-(2,2-dichloroethenyl)-2,2-dimethylcyclopropanecarboxylate	52315-07-8	Elm	Ulmus americana	Canada	Leaf litter	I	F	8.8	29	18.9	Jin H.; Webster B.G.R. Persistence, Penetration, and Surface Availability of Cypermethrin and Its Major Degradation Products in Elm Bark. Journal of Agricultural and Food Chemistry, 1998, 46(7), 2851-2857.
197	Cypermethrin	cyano(3-phenoxyphenyl)methyl 3-(2,2-dichloroethenyl)-2,2-dimethylcyclopropanecarboxylate	52315-07-8	Green bean	Phaseolus vulgaris var. Contender	CA, USA	Fruit	O	U	4.8	4.8	4.8	Cole L.M.; Casida J.E.; Ruzo L.O. Comparative degradation of the pyrethroids tralomethrin, tralocythrin, deltamethrin, and cypermethrin on cotton and bean foliage. Journal of Agricultural and Food Chemistry, 1982, 30(5), 916-920.
197	Cypermethrin	cyano(3-phenoxyphenyl)methyl 3-(2,2-dichloroethenyl)-2,2-dimethylcyclopropanecarboxylate	52315-07-8	Green bean	Phaseolus vulgaris	CA, USA	Leaves	I	F	4.8	4.8	4.8	Cole L.M.; Casida J.E.; Ruzo L.O. Comparative degradation of the pyrethroids tralomethrin, tralocythrin, deltamethrin, and cypermethrin on cotton and bean foliage. Journal of Agricultural and Food Chemistry, 1982, 30(5), 916-920
197	Cypermethrin	cyano(3-phenoxyphenyl)methyl 3-(2,2-dichloroethenyl)-2,2-dimethylcyclopropanecarboxylate	52315-07-8	Green mustard	Brassica juncea L. cv. Coss	Malaysia	Leaves	I	F	1.6	3.1	2.35	Chai L.-K.; Mohd-Tahir N.; Bruun Hansen H.C. Dissipation of acephate, chlorpyrifos, cypermethrin and their metabolites in a humid-tropical vegetable production system. Pest Management Science, 2009, 65(2), 189-196.
197	Cypermethrin	cyano(3-phenoxyphenyl)methyl 3-(2,2-dichloroethenyl)-2,2-dimethylcyclopropanecarboxylate	52315-07-8	Lemon	Citrus x limon var. verna	*	Fruit	I	F	9.63	11	10.32	Barba A.; Navarro S.; Cámara M.A. Persistence of the mixture of chlorfenvinphos and cypermethrin (Survan©) in citrus fruits. Journal of Environmental Science and Health, 1988, 23(4), 331-341. Calculated.
197	Cypermethrin	cyano(3-phenoxyphenyl)methyl 3-(2,2-dichloroethenyl)-2,2-dimethylcyclopropanecarboxylate	52315-07-8	Lettuce	Lactuca sativa cv. Ithaca, Romaine, Grand rapids & others	Canada	Head	O	F	2.8	3.3	3.05	Ripley B.D.; Ritcey G.M.; Harris C.R.; Denommé M.A.; Lissemore L.I. Comparative Persistence of Pesticides on Selected Cultivars of Specialty Vegetables. Journal of Agricultural and Food Chemistry, 2003, 51(5), 1328-1335.
197	Cypermethrin	cyano(3-phenoxyphenyl)methyl 3-(2,2-dichloroethenyl)-2,2-dimethylcyclopropanecarboxylate	52315-07-8	Litchi	Litchi chinensis	China	Fruit	I	F	2.3	2.5	2.4	Li C.F.; He Q.; Luo S.H.; Xu W.S.; Sun H.B. Residue Studies on Cypermethrin in Litchi and Soil. Pesticides, 2004, 43(7), 331-333.
197	Cypermethrin	cyano(3-phenoxyphenyl)methyl 3-(2,2-dichloroethenyl)-2,2-dimethylcyclopropanecarboxylate	52315-07-8	Jujube	Ziziphus mauritiana	India	Fruit	I	F	10.6	12.8	11.7	Sharma D.; Awasthi M.D.; Mohapatra S. Comparative Persistence Pattern of the Residues of Organophosphate and Synthetic Pyrethroid Insecticides in/on Ber Fruits. Indian Journal of Plant Protection, 1995, 23(1), 31-34.
197	Cypermethrin	cyano(3-phenoxyphenyl)methyl 3-(2,2-dichloroethenyl)-2,2-dimethylcyclopropanecarboxylate	52315-07-8	Mango	Mangifera indica L.	*	Fruit	O	F	3.71	5.83	4.77	Awasthi M.D. Persistence of synthetic pyrethroid residues on mango fruits. ISHS Acta Horticulturae, 1989, 231, 612-616.
197	Cypermethrin	cyano(3-phenoxyphenyl)methyl 3-(2,2-dichloroethenyl)-2,2-dimethylcyclopropanecarboxylate	52315-07-8	Mango	Mangifera indica L.	India	Fruit	I	F	8.28	8.28	8.28	Dubale J.J.; Patil R.D.; Mule R.S.; Jalgaonkar V.N. Dissipation of cypermethrin in mango (Mangifera indica L.) fruits. Pestology, 2010, 34(12), 30-32.
197	Cypermethrin	cyano(3-phenoxyphenyl)methyl 3-(2,2-dichloroethenyl)-2,2-dimethylcyclopropanecarboxylate	52315-07-8	Okra	Abelmoschus esculentus	Pakistan	Fruit	O	F	2.37	4.24	3.31	Khan B.A. Studies on the Residues of Commonly Used Insecticides on Fruits and Vegetables Grown in NWFP-Pakistan. Department of Agricultural Chemistry. NWFP Agricultural University Peshawar, Pakistan,2005, p. 193.
197	Cypermethrin	cyano(3-phenoxyphenyl)methyl 3-(2,2-dichloroethenyl)-2,2-dimethylcyclopropanecarboxylate	52315-07-8	Okra	Abelmoschus esculentus	India	Fruit	I	F	3.4	3.5	3.45	Singh S.P.; Kumar K.S.; Tanwar R.S. Dissipation and Decontamination of Cypermethrin and Fluvalinate Residues in Okra. Pesticide Research Journal, 2004, 16(2), 65-67.
197	Cypermethrin	cyano(3-phenoxyphenyl)methyl 3-(2,2-dichloroethenyl)-2,2-dimethylcyclopropanecarboxylate	52315-07-8	Okra	Abelmoschus esculentus	India	Fruit	I	F	4.11	4.11	4.11	Nath P.; Kumari B.; Yadav P.R.; Kathpal T.S. Persistence and Dissipation of Readymix Formulations of Insecticides In/On Okra Fruits. Environmental Monitoring and Assessment, 2005, 107(1-3), 173-179.
197	Cypermethrin	cyano(3-phenoxyphenyl)methyl 3-(2,2-dichloroethenyl)-2,2-dimethylcyclopropanecarboxylate	52315-07-8	Orange	Citrus x sinensis	India	Fruit	O	F	1.73	2.12	1.93	Awasthi M.D.; Anand L. Persistence and safety evaluation of synthetic pyrethroids on sweet orange fruits. Phytoparasitica, 1984, 12(2), 135-138.
197	Cypermethrin	cyano(3-phenoxyphenyl)methyl 3-(2,2-dichloroethenyl)-2,2-dimethylcyclopropanecarboxylate	52315-07-8	Pasture	*	Canada	Leaves	O	F	4.8	4.8	4.8	Westcott N.D.; Reichle R.A. Persistence of deltamethrin and cypermethrin on wheat and sweetclover. Journal of Environmental Science and Health, 1987, 22(1), 91-101. Calculated.
197	Cypermethrin	cyano(3-phenoxyphenyl)methyl 3-(2,2-dichloroethenyl)-2,2-dimethylcyclopropanecarboxylate	52315-07-8	Pepper (chilli)	Capsicum annuum L.	*	Fruit	I	*	1.32	1.32	1.32	Kumar K.P.; Reddy D.J.; Reddy K.N.; Babu T.R.; Narendranath V.V. Dissipation of Cypermethrin Residues in Chilli. Pesticide Research Journal, 2000, 12(1), 130-132
197	Cypermethrin	cyano(3-phenoxyphenyl)methyl 3-(2,2-dichloroethenyl)-2,2-dimethylcyclopropanecarboxylate	52315-07-8	Pepper (chilli)	Capsicum annuum L.	India	Fruit	O	*	4.43	4.7	4.57	Singh Y.; Mandal K.; Singh B. Persistence and risk assessment of cypermethrin residues on chilli (Capsicum annuum L.). Environmental Monitoring and Assessment, 2015, 187(3), 120.
197	Cypermethrin	cyano(3-phenoxyphenyl)methyl 3-(2,2-dichloroethenyl)-2,2-dimethylcyclopropanecarboxylate	52315-07-8	Spinach	Spinacia oleracea	China	Leaves	I	F	5.03	5.88	5.46	Chen Z.-D.; Feng M.-X.; Yuan Y.-W.; Chen Y.-l.; Lian, Z.-X. Research on residue dynamics laden in some commonly used pesticides in spinach. Journal of Safety and Environment, 2007, 7(3), 1-4.
197	Cypermethrin	cyano(3-phenoxyphenyl)methyl 3-(2,2-dichloroethenyl)-2,2-dimethylcyclopropanecarboxylate	52315-07-8	Spring onion	Allium fistulosum	India	Bulb	I	F	3	3	3	Srinivas S.P.; Banerjee K.; Jadhav M.R.; Ghaste M.S.; Lawande K.E. Bioefficacy, dissipation kinetics and safety evaluation of selected insecticides in Allium cepa L. Journal of Environmental Science and Health, 2012, 47(7), 700-709.
197	Cypermethrin	cyano(3-phenoxyphenyl)methyl 3-(2,2-dichloroethenyl)-2,2-dimethylcyclopropanecarboxylate	52315-07-8	Sunflower	Helianthus annuus	Greece	Leaves	I	F	2.76	3.9	3.33	Mantzos N.; Karakitsou A.; Hela D.; Konstantinou I. Environmental fate of the insecticide cypermethrin applied as microgranular and emulsifiable concentrate formulations in sunflower cultivated field plots. Science of the Total Environment, 2016, 541, 542-550.
197	Cypermethrin	cyano(3-phenoxyphenyl)methyl 3-(2,2-dichloroethenyl)-2,2-dimethylcyclopropanecarboxylate	52315-07-8	Tea	Camellia sinensis L.	China	Leaves	I	F	2.5	2.9	2.7	Zongmao C.; Haibin W. Factors affecting residues of pesticides in tea. Pesticide Science, 1988, 23(2), 109-118.
197	Cypermethrin	cyano(3-phenoxyphenyl)methyl 3-(2,2-dichloroethenyl)-2,2-dimethylcyclopropanecarboxylate	52315-07-8	Tomato	Lycopersicon esculentum Mill.	India	Fruit	I	F	2.5	4.8	3.4	Gupta S.; Gajbhiye V.T.; Sharma R.K.; Gupta R.K. Dissipation of cypermethrin, chlorpyriphos, and profenofos in tomato fruits and soil following application of pre-mix formulations. Environmental Monitoring and Assessment, 2011, 174(1-4), 337-345.
197	Cypermethrin	cyano(3-phenoxyphenyl)methyl 3-(2,2-dichloroethenyl)-2,2-dimethylcyclopropanecarboxylate	52315-07-8	Tomato	Lycopersicon esculentum Mill.	Pakistan	Fruit	O	F	3.63	6.84	5.24	Khan B.A. Studies on the Residues of Commonly Used Insecticides on Fruits and Vegetables Grown in NWFP-Pakistan. Department of Agricultural Chemistry. NWFP Agricultural University Peshawar, Pakistan, 2005, p. 193.
197	Cypermethrin	cyano(3-phenoxyphenyl)methyl 3-(2,2-dichloroethenyl)-2,2-dimethylcyclopropanecarboxylate	52315-07-8	Tomato	Lycopersicon esculentum Mill. cv. Pusa Ruby	India	Fruit	O	F	4	4.6	4.3	Awasthi M.D. Residues of pyrethroid treatments, alone or with foliar urea, on tomato. Phytoparasitica, 1986, 14(3), 231-233.
197	Cypermethrin	cyano(3-phenoxyphenyl)methyl 3-(2,2-dichloroethenyl)-2,2-dimethylcyclopropanecarboxylate	52315-07-8	Tomato	Lycopersicon esculentum Mill.	*	Leaves	O	F	7.3	7.3	7.3	El-Sebae A.H. Fate and undesirable effects of pesticides in Egypt. In: P. Bourdeau, J.A. Haines, W. Klein, a., Murti, C.R.K. (Eds.). Ecotoxicology and Climate. John Wiley and Sons, Chichester, 1989, 359-371.
197	Cypermethrin	cyano(3-phenoxyphenyl)methyl 3-(2,2-dichloroethenyl)-2,2-dimethylcyclopropanecarboxylate	52315-07-8	Tomato	Lycopersicon esculentum Mill.	*	Fruit	O	F	11.6	11.6	11.6	El-Sebae A.H. Fate and undesirable effects of pesticides in Egypt. In: P. Bourdeau, J.A. Haines, W. Klein, a., Murti, C.R.K. (Eds.). Ecotoxicology and Climate. John Wiley and Sons, Chichester, 1989, 359-371.
197	Cypermethrin	cyano(3-phenoxyphenyl)methyl 3-(2,2-dichloroethenyl)-2,2-dimethylcyclopropanecarboxylate	52315-07-8	Wheat	Triticum aestivum L.	Canada	Staw	O	F	7.37	7.37	7.37	Westcott N.D.; Reichle R.A. Persistence of deltamethrin and cypermethrin on wheat and sweetclover. Journal of Environmental Science and Health, 1987, 22(1), 91-101.
198	Cyproconazole	alpha-(4-chlorophenyl)-alpha-(1-cyclopropylethyl)-1H-1,2,4-triazole-1-ethanol	94361-06-5	Creeping bentgrass	Agrostis stolonifera var. Penneagle	IL, ISA	Thatch & blades	I	F	12	12	12	Gardner D.S.; Branham B.E.; Lickfeldt D.W. Effect of turfgrass on soil mobility and dissipation of cyproconazole. Crop Science, 2000, 40(5), 1333-1339.
198	Cyproconazole	alpha-(4-chlorophenyl)-alpha-(1-cyclopropylethyl)-1H-1,2,4-triazole-1-ethanol	94361-06-5	Grape	Vitis vinifera	Greece	Fruit	I	F	3	4	3.5	Papadopoulou‐Mourkidou E.; Kotopoulou A.; Papadopoulos G.; Hatziphanis C. Dissipation of cyproconazole and quinalphos on/in grapes. Pesticide Science, 1995, 45(2), 111-116
198	Cyproconazole	alpha-(4-chlorophenyl)-alpha-(1-cyclopropylethyl)-1H-1,2,4-triazole-1-ethanol	94361-06-5	Peach	Prunus persica	Italy	Fruit	I	F	16	16	16	Angioni A.; Del Real A.A.; Russo M.; Melis M.; Cabitza F.; Cabras P. Triazole fungicide degradation in peaches in the field and in model systems. Food Additives and Contaminants, 2003, 20(4), 368-374.
198	Cyproconazole	alpha-(4-chlorophenyl)-alpha-(1-cyclopropylethyl)-1H-1,2,4-triazole-1-ethanol	94361-06-5	Tomato	Lycopersicon esculentum Mill. cv. Shiren & Caramba	Italy	Fruit	O	U	13.86	13.86	13.86	Cabizza M.; Dedola F.; Satta M. Residues behavior of some fungicides applied on two greenhouse tomato varieties different in shape and weight. Journal of Environmental Science and Health, 2012, 47(5), 379-384. Calculated.
198	Cyproconazole	alpha-(4-chlorophenyl)-alpha-(1-cyclopropylethyl)-1H-1,2,4-triazole-1-ethanol	94361-06-5	Turfgrass	*	*	Blades	I	F	10	10	10	Cao T.T. Fate and a Prediction Model of Pesticides Residues Evolution in Plants. 2001, École Polytechnique Fédérale de Lausanne, Lausanne, Switzerland.
198	Cyproconazole	alpha-(4-chlorophenyl)-alpha-(1-cyclopropylethyl)-1H-1,2,4-triazole-1-ethanol	94361-06-5	Wheat	Triticum aestivum L.	*	Straw	I	F	16	16	16	Cao T.T. Fate and a Prediction Model of Pesticides Residues Evolution in Plants. 2001, École Polytechnique Fédérale de Lausanne, Lausanne, Switzerland.
199	Cyprodinil	4-cyclopropyl-6-methyl-N-phenyl-2-pyrimidinamine	121552-61-2	Ginseng	Panax ginseng	China	Root	I	F	11.8	11.8	11.8	Cui L.-l.; Gao J.; Li Y.-R.; Wang C.-W.; Feng Z.-W.; Ye P.-F. Residual Decline of Cyprodinil 50% WG in Ginseng and Soil. Agrochemicals, 2011, 50(9), 668-671.
199	Cyprodinil	4-cyclopropyl-6-methyl-N-phenyl-2-pyrimidinamine	121552-61-2	Ginseng	Panax ginseng	China	Stem	I	F	15.7	15.7	15.7	Cui L.-l.; Gao J.; Li Y.-R.; Wang C.-W.; Feng Z.-W.; Ye P.-F. Residual Decline of Cyprodinil 50% WG in Ginseng and Soil. Agrochemicals, 2011, 50(9), 668-671.
199	Cyprodinil	4-cyclopropyl-6-methyl-N-phenyl-2-pyrimidinamine	121552-61-2	Ginseng	Panax ginseng	china	Leaves	I	F	16.7	16.7	16.7	Cui L.-l.; Gao J.; Li Y.-R.; Wang C.-W.; Feng Z.-W.; Ye P.-F. Residual Decline of Cyprodinil 50% WG in Ginseng and Soil. Agrochemicals, 2011, 50(9), 668-671.
199	Cyprodinil	4-cyclopropyl-6-methyl-N-phenyl-2-pyrimidinamine	121552-61-2	Grape (table)	Vitis vinifera var. Superior	Spain	Fruit	O	F	4.68	4.68	4.68	Marín A.; Oliva J.; Garcia C.; Navarro S.; Barba A. Dissipation Rates of Cyprodinil and Fludioxonil in Lettuce and Table Grape in the Field and under Cold Storage Conditions. Journal of Agricultural and Food Chemistry, 2003, 51(16), 4708-4711.
199	Cyprodinil	4-cyclopropyl-6-methyl-N-phenyl-2-pyrimidinamine	121552-61-2	Grape (table)	Vitis vinifera var. Superior	Spain	Fruit	O	X (cold storage)	29.75	29.75	29.75	Marín A.; Oliva J.; Garcia C.; Navarro S.; Barba A. Dissipation Rates of Cyprodinil and Fludioxonil in Lettuce and Table Grape in the Field and under Cold Storage Conditions. Journal of Agricultural and Food Chemistry, 2003, 51(16), 4708-4711.
199	Cyprodinil	4-cyclopropyl-6-methyl-N-phenyl-2-pyrimidinamine	121552-61-2	Grape	Vitis vinifera cv. Vermentino	Italy	Fruit	O	F	12	12	12	Cabras P.; Angioni A.; Garau V.L.; Melis M.; Pirisi F.M.; Minelli E.V.; Cabitza F.; Cubeddu M. Fate of some new fungicides (cyprodinil, fludioxonil, pyrimethanil, and tebuconazole) from vine to wine. Journal of Agricultural and Food Chemisty, 1997, 45(7), 2708-2710
199	Cyprodinil	4-cyclopropyl-6-methyl-N-phenyl-2-pyrimidinamine	121552-61-2	Leek	Allium ampeloprasum, Leek Group	China	Leaves	I	F	1.8	2.8	2.3	Liu C.; Wang S.; Li L.; Zhao H.; Jiang S.; Liu F. Analysis of cyprodinil in leek and pepper and its decline under field conditions. Environmental Monitoring and Assessment, 2011, 179(1-4), 209-215.
199	Cyprodinil	4-cyclopropyl-6-methyl-N-phenyl-2-pyrimidinamine	121552-61-2	Lettuce	Lactuca sativa var. Iceberg	Spain	Head	O	F	2.6	2.9	2.75	Cabizza M.; Satta M.; Falconi S.; Onano M.; Uccheddu G. Degradation of cyprodinil, fludioxonil, cyfluthrin and pymetrozine on lettuce after different application methods. Journal of Environmental Science and Health, 2007, 42(7), 761-766.
199	Cyprodinil	4-cyclopropyl-6-methyl-N-phenyl-2-pyrimidinamine	121552-61-2	Lettuce	Lactuca sativa var. Romaine	Spain	Head	O	F	2.2	3	2.6	Cabizza M.; Satta M.; Falconi S.; Onano M.; Uccheddu G. Degradation of cyprodinil, fludioxonil, cyfluthrin and pymetrozine on lettuce after different application methods. Journal of Environmental Science and Health, 2007, 42(7), 761-766.
199	Cyprodinil	4-cyclopropyl-6-methyl-N-phenyl-2-pyrimidinamine	121552-61-2	Nectarine	Prunus persica Prunus persica var. Nucipersica cv. Caldesi	Italy	Fruit	O	F	7.03	9.07	8.05	Passarella I.; Elia I.; Guarino B.; Bourlot G.; Nègre M. Evaluation of the field dissipation of fungicides and insecticides used on fruit bearing trees in northern Italy. Journal of Environmental Science and Health, 2009, 44(2), 137-143.
199	Cyprodinil	4-cyclopropyl-6-methyl-N-phenyl-2-pyrimidinamine	121552-61-2	Nectarine	Prunus persica Prunus persica var. Nucipersica cv. Nectaross	Italy	Fruit	O	F	25	25	25	Passarella I.; Elia I.; Guarino B.; Bourlot G.; Nègre M. Evaluation of the field dissipation of fungicides and insecticides used on fruit bearing trees in northern Italy. Journal of Environmental Science and Health, 2009, 44(2), 137-143.
199	Cyprodinil	4-cyclopropyl-6-methyl-N-phenyl-2-pyrimidinamine	121552-61-2	Pepper	Capsiucum spp.	China	Fruit	I	F	2.6	3.8	3.2	Liu C.; Wang S.; Li L.; Zhao H.; Jiang S.; Liu F. Analysis of cyprodinil in leek and pepper and its decline under field conditions. Environmental Monitoring and Assessment, 2011, 179(1-4), 209-215.
199	Cyprodinil	4-cyclopropyl-6-methyl-N-phenyl-2-pyrimidinamine	121552-61-2	Pepper	Capsicum annuum L. cv. Almuden	Spain	Fruit	I	F	6.43	7.31	6.87	Fenoll J.; Ruiz E.; Hellín P.; Lacasa A.; Flores P. Dissipation rates of insecticides and fungicides in peppers grown in greenhouse and under cold storage conditions. Food Chemistry, 2009, 113(2), 727-732.
199	Cyprodinil	4-cyclopropyl-6-methyl-N-phenyl-2-pyrimidinamine	121552-61-2	Pepper	Capsicum annuum L. cv. Almuden	Spain	Fruit	I	X (cold storage)	46.25	51.55	48.9	Fenoll J.; Ruiz E.; Hellín P.; Lacasa A.; Flores P. Dissipation rates of insecticides and fungicides in peppers grown in greenhouse and under cold storage conditions. Food Chemistry, 2009, 113(2), 727-732.
199	Cyprodinil	4-cyclopropyl-6-methyl-N-phenyl-2-pyrimidinamine	121552-61-2	Strawberry	Fragaria x ananassa	China	Fruit	I	F	5.5	14.5	10	Liu C.; Wang S.; Li L.; Zhao H.; Jiang S.; Liu F. Analysis of cyprodinil in leek and pepper and its decline under field conditions. Environmental Monitoring and Assessment, 2011, 179(1-4), 209-215.
199	Cyprodinil	4-cyclopropyl-6-methyl-N-phenyl-2-pyrimidinamine	121552-61-2	Strawberry	Fragaria x ananassa	China	Fruit	O	U	2.8	2.8	2.8	Wang Z.; Cang T.; Qi P.; Zhao X.; Xu H.; Wang X.; ... Wang X. Dissipation of four fungicides on greenhouse strawberries and an assessment of their risks. Food Control, 2015, 55, 215-220
199	Cyprodinil	4-cyclopropyl-6-methyl-N-phenyl-2-pyrimidinamine	121552-61-2	Tomato	Lycopersicon esculentum	CA, USA	Leaves	O	U	4.9	6.7	5.8	Garau V.L.; Angioni A.; Del Real A.A.; Russo M.; Cabras P. Disappearance of azoxystrobin, pyrimethanil, cyprodinil, and fludioxonil on tomatoes in a greenhouse. Journal of Agricultural and Food Chemistry, 2002, 50(7), 1929-1932.
199	Cyprodinil	4-cyclopropyl-6-methyl-N-phenyl-2-pyrimidinamine	121552-61-2	Tomato	Lycopersicon esculentum Mill. cv. Shiren & Caramba	Italy	Leaves	O	F	7	12.38	9.69	Cabizza M.; Satta M.; Falconi S.; Onano M.; Uccheddu G. Degradation of cyprodinil, fludioxonil, cyfluthrin and pymetrozine on lettuce after different application methods. Journal of Environmental Science and Health, 2007, 42(7), 761-766.
199	Cyprodinil	4-cyclopropyl-6-methyl-N-phenyl-2-pyrimidinamine	121552-61-2	Tomato	Lycopersicon esculentum Mill. var. Marissa	Poland	Fruit	I	U	2.49	2.49	2.49	Jankowska M.; Kaczynski P.; Hrynko I.; Lozowicka B. Dissipation of six fungicides in greenhouse-grown tomatoes with processing and health risk. Environmental Science and Pollution Research, 2016, 23(12), 11885-11900
199	Cyprodinil	4-cyclopropyl-6-methyl-N-phenyl-2-pyrimidinamine	121552-61-2	Tomato	Lycopersicon esculentum Mill. var. Harzfeuer	Poland	Fruit	I	U	2.67	2.67	2.67	Jankowska M.; Kaczynski P.; Hrynko I.; Lozowicka B. Dissipation of six fungicides in greenhouse-grown tomatoes with processing and health risk. Environmental Science and Pollution Research, 2016, 23(12), 11885-11900
200	Cyromazine	N-cyclopropyl-1,3,5-triazine-2,4,6-triamine	66215-27-8	Cucumber	Cucumis sativus L.	China	Fruit	O	U	14.3	14.3	14.3	Wang J.-W.; Zhou H.; Bu H.-F.; Yang W.-Y.; Zhang H.; Wu, S.-G. The Degradation Dynamics of Cyromazine and Its Metabolite Melamine on Cucumbers in Greenhouse. Agrochemicals, 2011, 50(2), 130-132,140.
200	Cyromazine	N-cyclopropyl-1,3,5-triazine-2,4,6-triamine	66215-27-8	Green bean	Phaseolus vulgaris L. cv. Helda	Greece	Whole plant	I	X (hydroponic)	15.9	19.5	17.7	Patakioutas G.; Savvas D.; Matakoulis C.; Sakellarides T.; Albanis T. Application and Fate of Cyromazine in a Closed-Cycle Hydroponic Cultivation of Bean (Phaseolus vulgaris L.). Journal of Agricultural and Food Chemistry, 2007, 55(24), 9928-9935.
1613	Dalapon	2,2-dichloropropanoic acid	75-99-0	Birdsfoot trefoil	Lotus corniculatus var. Empire	USA	Leaves	I	F	36.9	36.9	36.9	Schreiber M.M. Herbicide Residues, Dalapon Residue in Bird's-foot Trefoil. Journal of Agricultural and Food Chemistry, 1959, 7(6), 427-429.
204	DDT	1,1'-(2,2,2-trichloroethylidene)bis(4-chlorobenzene)	50-29-3	Alfalfa	Medicago sativa	CA, USA	Leaves	O	F	6	6	6	Akesson N.B.; Yates W.E. Problems relating to application of agricultural chemicals and resulting drift residues. Annual Review of Entomology, 9, 285-318
204	DDT	1,1'-(2,2,2-trichloroethylidene)bis(4-chlorobenzene)	50-29-3	Alfalfa	Medicago sativa var. Ontario varigated	USA	Leaves	I	F	6	6	6	Hopkins L.; Norton L.B.; Gyrisco G.G. Persistence of insecticide residues on forage crops. Journal of Economic Entomology, 1952, 45(2), 213-18.
204	DDT	1,1'-(2,2,2-trichloroethylidene)bis(4-chlorobenzene)	50-29-3	Clover	Trifolium spp.	NY, USA	Leaves	I	F	3.4	3.4	3.4	Willis G.H.; McDowell L.L. Pesticide persistence on foliage. Reviews of Environmental Contamination and Toxicology, 1987, 100, 23-73.
204	DDT	1,1'-(2,2,2-trichloroethylidene)bis(4-chlorobenzene)	50-29-3	Clover	Trifolium spp.	*	Leaves	I	F	12	12	12	Decker G.C. Agricultural Applications of DDT, with special Reference to the Importance of Residues. Journal of Economic Entomology, 1946, 39(5), 557-562
204	DDT	1,1'-(2,2,2-trichloroethylidene)bis(4-chlorobenzene)	50-29-3	Collard	Brassica oleracea acephala	NC, USA	Leaves	I	F	1.9	1.9	1.9	Willis G.H.; McDowell L.L. Pesticide persistence on foliage. Reviews of Environmental Contamination and Toxicology, 1987, 100, 23-73.
204	DDT	1,1'-(2,2,2-trichloroethylidene)bis(4-chlorobenzene)	50-29-3	Cotton	Gossypium hirsutum L.	AZ, USA	Leaves	O	F	1.6	1.6	1.6	Willis G.H.; McDowell L.L. Pesticide persistence on foliage. Reviews of Environmental Contamination and Toxicology, 1987, 100, 23-73.
204	DDT	1,1'-(2,2,2-trichloroethylidene)bis(4-chlorobenzene)	50-29-3	Cotton	Gossypium hirsutum L.	MS, USA	Leaves	I	F	10.3	10.3	10.3	Willis G.H.; McDowell L.L. Pesticide persistence on foliage. Reviews of Environmental Contamination and Toxicology, 1987, 100, 23-73.
204	DDT	1,1'-(2,2,2-trichloroethylidene)bis(4-chlorobenzene)	50-29-3	Cotton	Gossypium hirsutum L.	Australia	Leaves	O	F	7	12	9.5	Wilson A.G.L.; Desmarchelier J.M.; Malafant K. Persistence on cotton foliage of insecticide residues toxic to Heliothis larvae. Pesticide Science, 1983, 14(6), 623-633.
204	DDT	1,1'-(2,2,2-trichloroethylidene)bis(4-chlorobenzene)	50-29-3	Cotton	Gossypium hirsutum L.	USA	Leaves	I	X (agro-ecosystem chamber)	29	29	29	Nash R.G.; Beall Jr. M.L.; Harris W.G. Toxaphene and 1,1,1-trichloro-2,2-bis(p-chlorophenyl)ethane (DDT) losses from cotton in an agroecosystem chamber. Journal of Agricultural and Food Chemistry, 1977, 25(2), 336-341.
204	DDT	1,1'-(2,2,2-trichloroethylidene)bis(4-chlorobenzene)	50-29-3	Grape	Vitis vinifera L. cv. Agawam, Fredonia, Delaware & Seibel 10878	Canada	Leaves	I	F	23	49	36	Chiba M. DDT residues in fruit, foliage, and soil of a vineyard following a standard insect control program. Canadian Journal of Plant Science, 1970, 50(3), 219-227.
204	DDT	1,1'-(2,2,2-trichloroethylidene)bis(4-chlorobenzene)	50-29-3	Grape	Vitis vinifera L. cv. Agawam, Fredonia, Delaware & Seibel 10878	Canada	Fruit	I	F	36	52	44	Chiba M. DDT residues in fruit, foliage, and soil of a vineyard following a standard insect control program. Canadian Journal of Plant Science, 1970, 50(3), 219-227.
204	DDT	1,1'-(2,2,2-trichloroethylidene)bis(4-chlorobenzene)	50-29-3	Lettuce	Lactuca sativa	*	Leaves	O	F	2	2	2	Sloan M.J.; Rawlins W.A.; Norton L.B. Factors affecting the loss of DDT and parathion residues on lettuce. Journal of Economic Entomology, 1951, 44(5), 701-709.
204	DDT	1,1'-(2,2,2-trichloroethylidene)bis(4-chlorobenzene)	50-29-3	Peppermint	Mentha x piperita	OR, USA	Hay	I	F	5.64	23.1	14.37	Starr H.; Kiigemagi U.; Terriere L.C. Insecticide Residues, Insecticide Residues in Peppermint and Their Distillation with Peppermint Oil. Journal of Agricultural and Food Chemistry, 1963, 11(6), 482-486. Calculated.
204	DDT	1,1'-(2,2,2-trichloroethylidene)bis(4-chlorobenzene)	50-29-3	Orange	Citrus x sinensis	*	Peel	I	F	26	26	26	Gunther F.A.; Blinn R.C. Analysis of Insecticides and Acaricides. International Science Publishers Inc., New York, N.Y. & London, England, 1955, 696 pp.
204	DDT	1,1'-(2,2,2-trichloroethylidene)bis(4-chlorobenzene)	50-29-3	Orange	Citrus x sinensis	*	Leaves	I	F	39	39	39	Gunther F.A.; Blinn R.C. Analysis of Insecticides and Acaricides. International Science Publishers Inc., New York, N.Y. & London, England, 1955, 696 pp.
204	DDT	1,1'-(2,2,2-trichloroethylidene)bis(4-chlorobenzene)	50-29-3	Peach	Prunus persica	*	Leaves	I	F	12	12	12	Decker G.C. Agricultural Applications of DDT, with special Reference to the Importance of Residues. Journal of Economic Entomology, 1946, 39(5), 557-562
204	DDT	1,1'-(2,2,2-trichloroethylidene)bis(4-chlorobenzene)	50-29-3	Peach	Prunus persica	*	Fruit	I	F	28	28	28	Brunson M.H.; Koblitsky L. Parathion, DDT and EPN deposits on peach foliage and fruit. Journal of Economic Entomology, 1952, 45(6), 953-957.
204	DDT	1,1'-(2,2,2-trichloroethylidene)bis(4-chlorobenzene)	50-29-3	Pear	Pyrus communis	Egypt	Fruit	O	F	8.56	13.08	10.82	Rawash I.A.; El-Gayar F.M.; Gaaboub I.A.; El-Shazli A.Y. Residue analysis of DDT, malathion and kelthane on pears. Toxicology, 1975, 4(2), 157-163. Calculated.
205	Deltamethrin	(S)-cyano(3-phenoxyphenyl)methyl (1R,3R)-3-(2,2-dibromoethenyl)-2,2-dimethylcyclopropanecarboxylate	52918-63-5	Alfalfa	Medicago sativa	*	Leaves	O	F	4	4	4	Mestres G.; Mestres R. Crop groupings: A survey of its possibilities for deltamethrin registrations. Archives of Environmental Contamination and Toxicology, 1985, 14(3), 321-324.
205	Deltamethrin	(S)-cyano(3-phenoxyphenyl)methyl (1R,3R)-3-(2,2-dibromoethenyl)-2,2-dimethylcyclopropanecarboxylate	52918-63-5	Alfalfa	Medicago sativa	*	Leaves	O	F	5.8	5.8	5.8	Hill B.D.; Inaba D.J. Fate and persistence of residues on wheat used to explain efficacy differences between deltamethrin suspension concentrate and emulsifiable concentrate formulations. Pesticide Science, 1990, 29(1), 57-66.
205	Deltamethrin	(S)-cyano(3-phenoxyphenyl)methyl (1R,3R)-3-(2,2-dibromoethenyl)-2,2-dimethylcyclopropanecarboxylate	52918-63-5	Apple	Malus pumila Mill.	*	Fruit	O	F	5	5	5	Mestres G.; Mestres R. Crop groupings: A survey of its possibilities for deltamethrin registrations. Archives of Environmental Contamination and Toxicology, 1985, 14(3), 321-324.
205	Deltamethrin	(S)-cyano(3-phenoxyphenyl)methyl (1R,3R)-3-(2,2-dibromoethenyl)-2,2-dimethylcyclopropanecarboxylate	52918-63-5	Artichoke	Cynara scolymus	*	Stem	O	F	15	15	15	Mestres G.; Mestres R. Crop groupings: A survey of its possibilities for deltamethrin registrations. Archives of Environmental Contamination and Toxicology, 1985, 14(3), 321-324.
205	Deltamethrin	(S)-cyano(3-phenoxyphenyl)methyl (1R,3R)-3-(2,2-dibromoethenyl)-2,2-dimethylcyclopropanecarboxylate	52918-63-5	Banana	Musa spp.	*	Flesh	O	F	6	6	6	Mestres G.; Mestres R. Crop groupings: A survey of its possibilities for deltamethrin registrations. Archives of Environmental Contamination and Toxicology, 1985, 14(3), 321-324.
205	Deltamethrin	(S)-cyano(3-phenoxyphenyl)methyl (1R,3R)-3-(2,2-dibromoethenyl)-2,2-dimethylcyclopropanecarboxylate	52918-63-5	Bean	Phaseolus vulgaris L. var. Contender	CA, USA	Leaves	O	U	4.1	4.1	4.1	Cole L.M.; Casida J.E. Ruzo L.O. Comparative degradation of the pyrethroids tralomethrin, tralocythrin, deltamethrin, and cypermethrin on cotton and bean foliage. Journal of Agricultural and Food Chemistry, 1982, 30(5), 916-920.
205	Deltamethrin	(S)-cyano(3-phenoxyphenyl)methyl (1R,3R)-3-(2,2-dibromoethenyl)-2,2-dimethylcyclopropanecarboxylate	52918-63-5	Blackcurrant	Ribes nigrum	*	Fruit	O	F	12	12	12	Mestres G.; Mestres R. Crop groupings: A survey of its possibilities for deltamethrin registrations. Archives of Environmental Contamination and Toxicology, 1985, 14(3), 321-324.
205	Deltamethrin	(S)-cyano(3-phenoxyphenyl)methyl (1R,3R)-3-(2,2-dibromoethenyl)-2,2-dimethylcyclopropanecarboxylate	52918-63-5	Broccoli	Brassica oleracea var. Italica	*	Head	O	F	4	8	6	Mestres G.; Mestres R. Crop groupings: A survey of its possibilities for deltamethrin registrations. Archives of Environmental Contamination and Toxicology, 1985, 14(3), 321-324.
205	Deltamethrin	(S)-cyano(3-phenoxyphenyl)methyl (1R,3R)-3-(2,2-dibromoethenyl)-2,2-dimethylcyclopropanecarboxylate	52918-63-5	Cabbage (spring)	Brassica oleracea capitata	China	Head	I	F	1.5	1.5	1.5	Zhang Z.-Y.; Liu X.-J.; Yu X.-Y.; Zhang C.-Z.; Hon X.-Y. Pesticide residues in the spring cabbage (Brassica oleracea L. var. capitata) grown in open field. Food Control, 2007, 18(6), 723-730.
205	Deltamethrin	(S)-cyano(3-phenoxyphenyl)methyl (1R,3R)-3-(2,2-dibromoethenyl)-2,2-dimethylcyclopropanecarboxylate	52918-63-5	Cabbage (spring)	Brassica oleracea capitata	China	Leaves	I	F	1.5	1.5	1.5	Zhang Z.-Y.; Liu X.-J.; Yu X.-Y.; Zhang C.-Z.; Hon X.-Y. Pesticide residues in the spring cabbage (Brassica oleracea L. var. capitata) grown in open field. Food Control, 2007, 18(6), 723-730.
205	Deltamethrin	(S)-cyano(3-phenoxyphenyl)methyl (1R,3R)-3-(2,2-dibromoethenyl)-2,2-dimethylcyclopropanecarboxylate	52918-63-5	Chinese cabbage	Brassica rapa subsp. pekinensis	China	Leaves	I	F	4.3	4.3	4.3	Zhang Z.Y.; Zhang C.Z.; Liu X.J.; Hong X.Y. Dynamics of pesticide residues in the autumn Chinese cabbage (Brassica chinensis L.) grown in open fields. Pest Management Science, 2006, 62(4), 350-355.
205	Deltamethrin	(S)-cyano(3-phenoxyphenyl)methyl (1R,3R)-3-(2,2-dibromoethenyl)-2,2-dimethylcyclopropanecarboxylate	52918-63-5	Cabbage	Brassica oleracea capitata	India	Head	I	F	2.47	2.48	2.48	Jaglan R.S.; Sircar P.; Dureja P. Persistence of some Synthetic Pyrethroids in/on Cabbage. Pesticide Research Journal, 1995, 7(2), 105-109.
205	Deltamethrin	(S)-cyano(3-phenoxyphenyl)methyl (1R,3R)-3-(2,2-dibromoethenyl)-2,2-dimethylcyclopropanecarboxylate	52918-63-5	Cabbage	Brassica oleracea capitata	*	Head	O	F	4	4	4	Mestres G.; Mestres R. Crop groupings: A survey of its possibilities for deltamethrin registrations. Archives of Environmental Contamination and Toxicology, 1985, 14(3), 321-324.
205	Deltamethrin	(S)-cyano(3-phenoxyphenyl)methyl (1R,3R)-3-(2,2-dibromoethenyl)-2,2-dimethylcyclopropanecarboxylate	52918-63-5	Carrot	Daucus carota subsp. Sativus	*	Root	O	F	5	5	5	Mestres G.; Mestres R. Crop groupings: A survey of its possibilities for deltamethrin registrations. Archives of Environmental Contamination and Toxicology, 1985, 14(3), 321-324.
205	Deltamethrin	(S)-cyano(3-phenoxyphenyl)methyl (1R,3R)-3-(2,2-dibromoethenyl)-2,2-dimethylcyclopropanecarboxylate	52918-63-5	Cauliflower	Brassica oleracea botrytis	India	Curd	I	F	2.2	2.6	2.4	Gupta S.; Sharma R.K.; Gajbhiye V.T.; Gupta R.K. Persistence of insecticides in ready-mix formulations and their efficacy against Lipaphis erysimi (Kalt) in cauliflower. Environmental Monitoring and Assessment, 2012, 185(3), 2107-2114.
205	Deltamethrin	(S)-cyano(3-phenoxyphenyl)methyl (1R,3R)-3-(2,2-dibromoethenyl)-2,2-dimethylcyclopropanecarboxylate	52918-63-5	Cherry	Prunus avium	*	Fruit	O	F	15	15	15	Mestres G.; Mestres R. Crop groupings: A survey of its possibilities for deltamethrin registrations. Archives of Environmental Contamination and Toxicology, 1985, 14(3), 321-324.
205	Deltamethrin	(S)-cyano(3-phenoxyphenyl)methyl (1R,3R)-3-(2,2-dibromoethenyl)-2,2-dimethylcyclopropanecarboxylate	52918-63-5	Cotton	Gossypium hirsutum L.	CA, USA	Leaves	I	F	7.7	7.7	7.7	Cole L.M.; Casida J.E.; Ruzo L.O. Comparative degradation of the pyrethroids tralomethrin, tralocythrin, deltamethrin, and cypermethrin on cotton and bean foliage. Journal of Agricultural and Food Chemistry, 1982, 30(5), 916-920
205	Deltamethrin	(S)-cyano(3-phenoxyphenyl)methyl (1R,3R)-3-(2,2-dibromoethenyl)-2,2-dimethylcyclopropanecarboxylate	52918-63-5	Cotton	Gossypium hirsutum L.	CA, USA	Leaves	I	F	7.7	7.7	7.7	Ruzo L.O.; Casida J.E. Degradation of decamethrin on cotton plants. Journal of Agricultural and Food Chemistry, 1979, 27(3), 572-575
205	Deltamethrin	(S)-cyano(3-phenoxyphenyl)methyl (1R,3R)-3-(2,2-dibromoethenyl)-2,2-dimethylcyclopropanecarboxylate	52918-63-5	Cotton	Gossypium hirsutum L.	AZ, USA	Leaves	O	F	2.2	2.2	2.2	Estesen B.J.; Buck N.A.; Ware G.W. Dislodgeable insecticide residues on cotton foliage: permethrin, curacron, fenvalerate, sulprofos, decis and endosulfan. Bulletin of Environmental Contamination and Toxicology, 1979, 22, 245-248
205	Deltamethrin	(S)-cyano(3-phenoxyphenyl)methyl (1R,3R)-3-(2,2-dibromoethenyl)-2,2-dimethylcyclopropanecarboxylate	52918-63-5	Cotton	Gossypium hirsutum L.	USA	Leaves	O	F	10	10	10	Frank J.P. Tralomethrin - Risk Characterization Document. Health Assessment Section. Medical Toxicology Branch, Department Pesticide Regulation. California Environmental Protection Agency, Sacramento, CA, 1996, p. 69.
205	Deltamethrin	(S)-cyano(3-phenoxyphenyl)methyl (1R,3R)-3-(2,2-dibromoethenyl)-2,2-dimethylcyclopropanecarboxylate	52918-63-5	Cowpea	Vigna unguiculata	Australia	Fruit	I	F	1.45	1.45	1.45	Soliman M.M.M. Persistence of New Insecticides and Their Efficacy Against Insect Pests of Cowpea. Australian Journal of Basic and Applied Sciences, 2011, 5(2), 82-89.
205	Deltamethrin	(S)-cyano(3-phenoxyphenyl)methyl (1R,3R)-3-(2,2-dibromoethenyl)-2,2-dimethylcyclopropanecarboxylate	52918-63-5	Cowpea	Vigna unguiculata L. cv. Walpers	India	Pods	I	F	2.3	2.3	2.3	Panickar B.K.; Jhala R.C.; Shah P.G. Dissipation of Fenvalerate, Deltamethrin and Endosulfan in/on Pods of Cowpea [Vigna unguiculata (Linnaeus) Walpers]. Pesticide Research Journal, 2005, 17(2), 74-76.
205	Deltamethrin	(S)-cyano(3-phenoxyphenyl)methyl (1R,3R)-3-(2,2-dibromoethenyl)-2,2-dimethylcyclopropanecarboxylate	52918-63-5	Cucumber	Cucumis sativus L.	*	Fruit	O	F	2	2	2	Mestres G.; Mestres R. Crop groupings: A survey of its possibilities for deltamethrin registrations. Archives of Environmental Contamination and Toxicology, 1985, 14(3), 321-324.
205	Deltamethrin	(S)-cyano(3-phenoxyphenyl)methyl (1R,3R)-3-(2,2-dibromoethenyl)-2,2-dimethylcyclopropanecarboxylate	52918-63-5	Eggplant	Solanum melongena L. cv. Pusa Kranti	India	Fruit	I	F	1.2	4.3	2.75	Raha P.; Banerjee H.; Das A.K.; Adityachaudhury N. Persistence kinetics of endosulfan, fenvalerate, and decamethrin in and on eggplant (Solanum melongena L.). Journal of Agricultural and Food Chemistry, 1993, 41(6), 923-928.
205	Deltamethrin	(S)-cyano(3-phenoxyphenyl)methyl (1R,3R)-3-(2,2-dibromoethenyl)-2,2-dimethylcyclopropanecarboxylate	52918-63-5	Eggplant	Solanum melongena L. cv. Pusa Kranti	India	Leaves	I	F	1.67	1.67	1.67	Raha P.; Banerjee H.; Das A.K.; Adityachaudhury N. Persistence kinetics of endosulfan, fenvalerate, and decamethrin in and on eggplant (Solanum melongena L.). Journal of Agricultural and Food Chemistry, 1993, 41(6), 923-928.
205	Deltamethrin	(S)-cyano(3-phenoxyphenyl)methyl (1R,3R)-3-(2,2-dibromoethenyl)-2,2-dimethylcyclopropanecarboxylate	52918-63-5	Eggplant	Solanum melongena L. var. BR112	India	Fruit	I	F	1.33	1.42	1.38	Kaur P.; Yadav G.S.; Chauhan R.; Kumari B. Persistence of Cypermethrin and Decamethrin Residues in/on Brinjal Fruits. Bulletin of Environmental Contamination and Toxicology, 2011, 87(6), 693-698.
205	Deltamethrin	(S)-cyano(3-phenoxyphenyl)methyl (1R,3R)-3-(2,2-dibromoethenyl)-2,2-dimethylcyclopropanecarboxylate	52918-63-5	Eggplant	Solanum melongena L.	West Africa	Leaves	O	F	3.63	3.63	3.63	Rosendahl I.; Laabs V.; Atcha-Ahowé C.; James B.; Amelung W. Insecticide dissipation from soil and plant surfaces in tropical horticulture of southern Benin, West Africa. Journal of Environmental Monitoring, 2009, 11, 1157-1164.
205	Deltamethrin	(S)-cyano(3-phenoxyphenyl)methyl (1R,3R)-3-(2,2-dibromoethenyl)-2,2-dimethylcyclopropanecarboxylate	52918-63-5	Grape	Vitis vinifera L.	*	Fruit	O	F	7	7	7	Mestres G.; Mestres R. Crop groupings: A survey of its possibilities for deltamethrin registrations. Archives of Environmental Contamination and Toxicology, 1985, 14(3), 321-324.
205	Deltamethrin	(S)-cyano(3-phenoxyphenyl)methyl (1R,3R)-3-(2,2-dibromoethenyl)-2,2-dimethylcyclopropanecarboxylate	52918-63-5	Green bean	Phaseolus vulgaris	Spain	Fruit	I	U	0.66	1	0.83	Martinez Galera M.; Gil Garcia M.D.; Rodriguez Lallena J.A.; Lopez Lopez T.; Martinez Vidal J.L. Dissipation of pyrethroid residues in peppers, zucchinis, and green beans exposed to field treatments in greenhouses: evaluation by decline curves. Journal of Agricultural and Food Chemistry, 2003, 51(19), 5745-5751.
205	Deltamethrin	(S)-cyano(3-phenoxyphenyl)methyl (1R,3R)-3-(2,2-dibromoethenyl)-2,2-dimethylcyclopropanecarboxylate	52918-63-5	Green bean	Phaseolus vulgaris	*	Fruit	O	F	4	8	6	Mestres G.; Mestres R. Crop groupings: A survey of its possibilities for deltamethrin registrations. Archives of Environmental Contamination and Toxicology, 1985, 14(3), 321-324.
205	Deltamethrin	(S)-cyano(3-phenoxyphenyl)methyl (1R,3R)-3-(2,2-dibromoethenyl)-2,2-dimethylcyclopropanecarboxylate	52918-63-5	Green bean	Phaseolus vulgaris	*	Leaves	O	F	4.1	4.1	4.1	Antonious G.F. Residues and Half-Lives of Pyrethrins on Field-Grown Pepper and Tomato. Journal of Environmental Science and Health, 2005, 39(4), 491-503.
205	Deltamethrin	(S)-cyano(3-phenoxyphenyl)methyl (1R,3R)-3-(2,2-dibromoethenyl)-2,2-dimethylcyclopropanecarboxylate	52918-63-5	Green bean	Phaseolus vulgaris	CA, USA	Leaves	I	F	4.1	4.1	4.1	Cole L.M.; Casida J.E.; Ruzo L.O. Comparative degradation of the pyrethroids tralomethrin, tralocythrin, deltamethrin, and cypermethrin on cotton and bean foliage. Journal of Agricultural and Food Chemistry, 1982, 30(5), 916-920
205	Deltamethrin	(S)-cyano(3-phenoxyphenyl)methyl (1R,3R)-3-(2,2-dibromoethenyl)-2,2-dimethylcyclopropanecarboxylate	52918-63-5	Green bean	Phaseolus vulgaris	*	Leaves	O	U	6	6	6	Mestres R.;, Francois C.; Causse C.; Vian L.; Winnett G. Survey of exposure to pesticides in greenhouses. Bulletin of Environmental Contamination and Toxicology, 1985, 35(1), 750-756.
205	Deltamethrin	(S)-cyano(3-phenoxyphenyl)methyl (1R,3R)-3-(2,2-dibromoethenyl)-2,2-dimethylcyclopropanecarboxylate	52918-63-5	Leek	Allium ampeloprasum, Leek Group	*	Leaves	O	F	8	8	8	Mestres G.; Mestres R. Crop groupings: A survey of its possibilities for deltamethrin registrations. Archives of Environmental Contamination and Toxicology, 1985, 14(3), 321-324.
205	Deltamethrin	(S)-cyano(3-phenoxyphenyl)methyl (1R,3R)-3-(2,2-dibromoethenyl)-2,2-dimethylcyclopropanecarboxylate	52918-63-5	Lettuce	Lactuca sativa	*	Leaves	O	F	4	4	4	Mestres G.; Mestres R. Crop groupings: A survey of its possibilities for deltamethrin registrations. Archives of Environmental Contamination and Toxicology, 1985, 14(3), 321-324.
205	Deltamethrin	(S)-cyano(3-phenoxyphenyl)methyl (1R,3R)-3-(2,2-dibromoethenyl)-2,2-dimethylcyclopropanecarboxylate	52918-63-5	Lettuce	Lactuca sativa	Belgium	Leaves	O	U	4.53	22.36	13.45	Dejonckheere W.; Verstraeten R.; Steurbaut W.; Melkebeke G.; Kips R.H. Permethrin and deltamethrin residues on lettuce. Pesticide Science, 1982, 13(4), 351-356. Calculated.
205	Deltamethrin	(S)-cyano(3-phenoxyphenyl)methyl (1R,3R)-3-(2,2-dibromoethenyl)-2,2-dimethylcyclopropanecarboxylate	52918-63-5	Lettuce	Lactuca sativa	Belgium	Head	O	F	9	9	9	Dejonckheere W.; Verstraeten R.; Steurbaut W.; Melkebeke G.; Kips R.H. Permethrin and deltamethrin residues on lettuce. Pesticide Science, 1982, 13(4), 351-356. Calculated.
205	Deltamethrin	(S)-cyano(3-phenoxyphenyl)methyl (1R,3R)-3-(2,2-dibromoethenyl)-2,2-dimethylcyclopropanecarboxylate	52918-63-5	Mango	Mangifera indica L.	*	Fruit	O	F	3.81	4.68	4.25	Awasthi M.D. Persistence of synthetic pyrethroid residues on mango fruits. ISHS Acta Horticulturae, 1989, 231, 612-616.
205	Deltamethrin	(S)-cyano(3-phenoxyphenyl)methyl (1R,3R)-3-(2,2-dibromoethenyl)-2,2-dimethylcyclopropanecarboxylate	52918-63-5	Maize (green)	Zea mays L.	*	Leaves	O	F	4	4	4	Mestres R.;, Francois C.; Causse C.; Vian L.; Winnett G. Survey of exposure to pesticides in greenhouses. Bulletin of Environmental Contamination and Toxicology, 1985, 35(1), 750-756.
205	Deltamethrin	(S)-cyano(3-phenoxyphenyl)methyl (1R,3R)-3-(2,2-dibromoethenyl)-2,2-dimethylcyclopropanecarboxylate	52918-63-5	Mung bean	Vigna radiata L. Wilczek	India	Fruit	I	F	2.5	3.3	2.9	Sukul P. Dissipation of deltamethrin and fenvalerate residues in green gram (Vigna radiata (L.) Wilczek) under Indian climatic condition. Bulletin of Environmental Contamination and Toxicology, 1995, 85(4), 562-567.
205	Deltamethrin	(S)-cyano(3-phenoxyphenyl)methyl (1R,3R)-3-(2,2-dibromoethenyl)-2,2-dimethylcyclopropanecarboxylate	52918-63-5	Nectarine	Prunus persica var. Nucipersica	*	Fruit	O	F	6	13	9.5	Mestres G.; Mestres R. Crop groupings: A survey of its possibilities for deltamethrin registrations. Archives of Environmental Contamination and Toxicology, 1985, 14(3), 321-324.
205	Deltamethrin	(S)-cyano(3-phenoxyphenyl)methyl (1R,3R)-3-(2,2-dibromoethenyl)-2,2-dimethylcyclopropanecarboxylate	52918-63-5	Oilseed rape	Brassica campestris	India	Leaves	O	F	1.51	1.51	1.51	Devee, A.; Baruah, A.A.L.H. Persistence and Dissipation of Imidacloprid and Bifenthrin on Rapeseed Leaves. Pesticide Research Journal, 2010, 22(1), 59-62.
205	Deltamethrin	(S)-cyano(3-phenoxyphenyl)methyl (1R,3R)-3-(2,2-dibromoethenyl)-2,2-dimethylcyclopropanecarboxylate	52918-63-5	Oilseed rape	Brassica napus	*	Leaves	O	F	4	4	4	Mestres G.; Mestres R. Crop groupings: A survey of its possibilities for deltamethrin registrations. Archives of Environmental Contamination and Toxicology, 1985, 14(3), 321-324.
205	Deltamethrin	(S)-cyano(3-phenoxyphenyl)methyl (1R,3R)-3-(2,2-dibromoethenyl)-2,2-dimethylcyclopropanecarboxylate	52918-63-5	Okra	Abelmoschus esculentus	India	Fruit	I	F	1.03	1.15	1.09	Sen S.; Chowdhury A.. Long-term residue and persistence study of deltamethrin in Brinjal. Pestology, 1999, 23(9), 35-38.
205	Deltamethrin	(S)-cyano(3-phenoxyphenyl)methyl (1R,3R)-3-(2,2-dibromoethenyl)-2,2-dimethylcyclopropanecarboxylate	52918-63-5	Olive	Olea europaea	*	Fruit	O	F	15	15	15	Mestres G.; Mestres R. Crop groupings: A survey of its possibilities for deltamethrin registrations. Archives of Environmental Contamination and Toxicology, 1985, 14(3), 321-324.
205	Deltamethrin	(S)-cyano(3-phenoxyphenyl)methyl (1R,3R)-3-(2,2-dibromoethenyl)-2,2-dimethylcyclopropanecarboxylate	52918-63-5	Onion	Allium cepa	*	Leaves	O	F	4	8	6	Mestres G.; Mestres R. Crop groupings: A survey of its possibilities for deltamethrin registrations. Archives of Environmental Contamination and Toxicology, 1985, 14(3), 321-324.
205	Deltamethrin	(S)-cyano(3-phenoxyphenyl)methyl (1R,3R)-3-(2,2-dibromoethenyl)-2,2-dimethylcyclopropanecarboxylate	52918-63-5	Orange	Citrus x sinensis	India	Fruit	O	F	2.6	2.9	2.75	Awasthi M.D.; Anand L. Persistence and safety evaluation of synthetic pyrethroids on sweet orange fruits. Phytoparasitica, 1984, 12(2), 135-138.
205	Deltamethrin	(S)-cyano(3-phenoxyphenyl)methyl (1R,3R)-3-(2,2-dibromoethenyl)-2,2-dimethylcyclopropanecarboxylate	52918-63-5	Passion fruit (yellow)	Passiflora edulis f. flavicarpa Degener	Columbia	Pulp	I	F	3.5	3.5	3.5	Juraske R.; Fantke P.; Romero Ramírez A.C.; González A. Pesticide residue dynamics in passion fruits: Comparing field trial and modeling results. Chemosphere, 2012, 89, 850-855.
205	Deltamethrin	(S)-cyano(3-phenoxyphenyl)methyl (1R,3R)-3-(2,2-dibromoethenyl)-2,2-dimethylcyclopropanecarboxylate	52918-63-5	Passion fruit (yellow)	Passiflora edulis f. flavicarpa Degener	Columbia	Fruit	I	F	4.4	4.4	4.4	Juraske R.; Fantke P.; Romero Ramírez A.C.; González A. Pesticide residue dynamics in passion fruits: Comparing field trial and modeling results. Chemosphere, 2012, 89, 850-855.
205	Deltamethrin	(S)-cyano(3-phenoxyphenyl)methyl (1R,3R)-3-(2,2-dibromoethenyl)-2,2-dimethylcyclopropanecarboxylate	52918-63-5	Pasture	*	*	Leaves	O	F	12	12	12	Hill B.D.; Inaba D.J. Fate and persistence of residues on wheat used to explain efficacy differences between deltamethrin suspension concentrate and emulsifiable concentrate formulations. Pesticide Science, 1990, 29(1), 57-66.
205	Deltamethrin	(S)-cyano(3-phenoxyphenyl)methyl (1R,3R)-3-(2,2-dibromoethenyl)-2,2-dimethylcyclopropanecarboxylate	52918-63-5	Peach	Prunus persica	*	Fruit	O	F	3	5	4	Mestres G.; Mestres R. Crop groupings: A survey of its possibilities for deltamethrin registrations. Archives of Environmental Contamination and Toxicology, 1985, 14(3), 321-324.
205	Deltamethrin	(S)-cyano(3-phenoxyphenyl)methyl (1R,3R)-3-(2,2-dibromoethenyl)-2,2-dimethylcyclopropanecarboxylate	52918-63-5	Pepper	Capsicum spp.	Spain	Fruit	I	U	0.29	1.23	0.76	Martinez Galera, M., Gil Garcia, M. D., Rodriguez Lallena, J. A., Lopez Lopez, T., & Martinez Vidal, J. L. (2003). Dissipation of pyrethroid residues in peppers, zucchinis, and green beans exposed to field treatments in greenhouses: evaluation by decline curves. Journal of Agricultural and Food Chemistry, 51(19), 5745-5751.
205	Deltamethrin	(S)-cyano(3-phenoxyphenyl)methyl (1R,3R)-3-(2,2-dibromoethenyl)-2,2-dimethylcyclopropanecarboxylate	52918-63-5	Pepper	Capsicum annuum L. var. Chilgok-gun	India	Fruit	O	F	0.36	2.06	1.21	Pandher S.; Sahoo S.K.; Battu R.S.; Singh B.; Saiyad M.S.; Patel A.R.; Shah P.G.; Reddy C.N.; Reddy D.J.; Reddy K.N.; Rao C.S.; Banerjee T.; Banerjee D.; Hudait R.; Banerjee H.; Tripathy V.; Sharma K.K. Persistence and dissipation kinetics of deltamethrin on chili in different agro-climatic zones of India. Bulletin of Environmental Contamination and Toxicology, 2012, 88(5), 764-768.
205	Deltamethrin	(S)-cyano(3-phenoxyphenyl)methyl (1R,3R)-3-(2,2-dibromoethenyl)-2,2-dimethylcyclopropanecarboxylate	52918-63-5	Pepper	Capsicum annuum L. var. Chilgok-gun	Republic of Korea	Fruit	I	U	3.2	3.7	3.45	Kwon C.H.; Lee Y.D. Distribution and dissipation of deltamethrin, dimethomorph, imidacloprid, mepanipyrim, and metalaxyl applied to chili peppers. Journal of the Korean Society for Applied Biological Chemistry, 2015, 58(6), 821-829.
205	Deltamethrin	(S)-cyano(3-phenoxyphenyl)methyl (1R,3R)-3-(2,2-dibromoethenyl)-2,2-dimethylcyclopropanecarboxylate	52918-63-5	Plum	Prunus domestica	*	Fruit	O	F	5	5	5	Mestres G.; Mestres R. Crop groupings: A survey of its possibilities for deltamethrin registrations. Archives of Environmental Contamination and Toxicology, 1985, 14(3), 321-324.
205	Deltamethrin	(S)-cyano(3-phenoxyphenyl)methyl (1R,3R)-3-(2,2-dibromoethenyl)-2,2-dimethylcyclopropanecarboxylate	52918-63-5	Raspberry	Rubus idaeus	*	Fruit	O	F	11	11	11	Mestres G.; Mestres R. Crop groupings: A survey of its possibilities for deltamethrin registrations. Archives of Environmental Contamination and Toxicology, 1985, 14(3), 321-324.
205	Deltamethrin	(S)-cyano(3-phenoxyphenyl)methyl (1R,3R)-3-(2,2-dibromoethenyl)-2,2-dimethylcyclopropanecarboxylate	52918-63-5	Spinach	Spinacia oleracea	*	Leaves	O	F	4	6	5	Mestres G.; Mestres R. Crop groupings: A survey of its possibilities for deltamethrin registrations. Archives of Environmental Contamination and Toxicology, 1985, 14(3), 321-324.
205	Deltamethrin	(S)-cyano(3-phenoxyphenyl)methyl (1R,3R)-3-(2,2-dibromoethenyl)-2,2-dimethylcyclopropanecarboxylate	52918-63-5	Strawberry	Fragaria x ananassa	*	Fruit	O	F	7	7	7	Mestres G.; Mestres R. Crop groupings: A survey of its possibilities for deltamethrin registrations. Archives of Environmental Contamination and Toxicology, 1985, 14(3), 321-324.
205	Deltamethrin	(S)-cyano(3-phenoxyphenyl)methyl (1R,3R)-3-(2,2-dibromoethenyl)-2,2-dimethylcyclopropanecarboxylate	52918-63-5	Sugarbeet	Beta vulgaris subsp. vulgaris convar. vulgaris var. Altissima	*	Root	O	F	5	5	5	Mestres G.; Mestres R. Crop groupings: A survey of its possibilities for deltamethrin registrations. Archives of Environmental Contamination and Toxicology, 1985, 14(3), 321-324.
205	Deltamethrin	(S)-cyano(3-phenoxyphenyl)methyl (1R,3R)-3-(2,2-dibromoethenyl)-2,2-dimethylcyclopropanecarboxylate	52918-63-5	Tea	Camellia sinensis L.	China	Leaves	I	F	3.2	3.2	3.2	Zongmao C.; Haibin W. Factors affecting residues of pesticides in tea. Pesticide Science, 1988, 23(2), 109-118.
205	Deltamethrin	(S)-cyano(3-phenoxyphenyl)methyl (1R,3R)-3-(2,2-dibromoethenyl)-2,2-dimethylcyclopropanecarboxylate	52918-63-5	Tomato	Lycopersicon esculentum Mill. cv. Pusa Ruby		Fruit	O	F	1.4	1.8	1.6	Awasthi, M.D. Residues of pyrethroid treatments, alone or with foliar urea, on tomato. Phytoparasitica, 1986, 14(3), 231-233.
205	Deltamethrin	(S)-cyano(3-phenoxyphenyl)methyl (1R,3R)-3-(2,2-dibromoethenyl)-2,2-dimethylcyclopropanecarboxylate	52918-63-5	Tomato	Lycopersicon esculentum	*	Fruit	O	F	7	10	8.5	Mestres G.; Mestres R. Crop groupings: A survey of its possibilities for deltamethrin registrations. Archives of Environmental Contamination and Toxicology, 1985, 14(3), 321-324.
205	Deltamethrin	(S)-cyano(3-phenoxyphenyl)methyl (1R,3R)-3-(2,2-dibromoethenyl)-2,2-dimethylcyclopropanecarboxylate	52918-63-5	Wheat	Triticum aestivum L. em Thell cv. Neepawa	Canada	Leaves	O	F	4.3	12	8.15	Hill B.D.; Inaba D.J. Fate and persistence of residues on wheat used to explain efficacy differences between deltamethrin suspension concentrate and emulsifiable concentrate formulations. Pesticide Science, 1990, 29(1), 57-66.
205	Deltamethrin	(S)-cyano(3-phenoxyphenyl)methyl (1R,3R)-3-(2,2-dibromoethenyl)-2,2-dimethylcyclopropanecarboxylate	52918-63-5	Wheat	Triticum aestivum L.	*	Straw	I	F	6	6	6	Cao T.T. Fate and a Prediction Model of Pesticides Residues Evolution in Plants. École Polytechnique Fédérale de Lausanne, Lausanne, Switzerland, 2001.
205	Deltamethrin	(S)-cyano(3-phenoxyphenyl)methyl (1R,3R)-3-(2,2-dibromoethenyl)-2,2-dimethylcyclopropanecarboxylate	52918-63-5	Wheat	Triticum aestivum L.	Canada	Straw	O	F	8.56	8.56	8.56	Westcott N.D.; Reichle R.A.. Persistence of deltamethrin and cypermethrin on wheat and sweetclover. Journal of Environmental Science and Health, 1987, 22(1), 91-101. Calculated.
205	Deltamethrin	(S)-cyano(3-phenoxyphenyl)methyl (1R,3R)-3-(2,2-dibromoethenyl)-2,2-dimethylcyclopropanecarboxylate	52918-63-5	Zucchini	Cucurbita pepo var. Cylindrica	Spain	Fruit	I	U	0.36	0.61	0.49	Martinez Galera M.; Gil Garcia M.D.; Rodriguez Lallena J.A.; Lopez Lopez T.; Martinez Vidal J.L. Dissipation of pyrethroid residues in peppers, zucchinis, and green beans exposed to field treatments in greenhouses: evaluation by decline curves. Journal of Agricultural and Food Chemistry, 2003, 51(19), 5745-5751.
1537	Demeton	O,O-diethyl O-(2-(ethylthio)ethyl) phosphorothioate mixture with O,O-diethyl S-(2-(ethylthio)ethyl) phosphorothioate	8065-48-3	Beetroot	Veta vulgaris	CA, USA	Leaves	O	F	8.8	8.8	8.8	Vail P.V.; Stone M.W.; Maitlen J.C.; George D.A.; Butler L.I. Performance of insecticides against cabbage and green peach aphids on leafy vegetables and persistence of residues during cool weather. Journal of Economic Entomology, 1967, 6, 537-541
1537	Demeton	O,O-diethyl O-(2-(ethylthio)ethyl) phosphorothioate mixture with O,O-diethyl S-(2-(ethylthio)ethyl) phosphorothioate	8065-48-3	Chard	Beta vulgaris subsp. Vulgaris	CA, USA	Leaves	O	F	8.2	8.2	8.2	Willis G.H.; McDowell L.L. Pesticide persistence on foliage. Reviews of Environmental Contamination and Toxicology, 1987, 100, 23-73.
1537	Demeton	O,O-diethyl O-(2-(ethylthio)ethyl) phosphorothioate mixture with O,O-diethyl S-(2-(ethylthio)ethyl) phosphorothioate	8065-48-3	Chickpea	Cicer arietinum	*	Fruit	I	F	5	5	5	Gunther F.A.; Blinn R.C. Persisting Insecticide Residues in Plant Materials. Annual Review of Entomology, 1956, 1, 167-180.
1537	Demeton	O,O-diethyl O-(2-(ethylthio)ethyl) phosphorothioate mixture with O,O-diethyl S-(2-(ethylthio)ethyl) phosphorothioate	8065-48-3	Collard	Brassica oleracea acephala	FL, USA	Leaves	I	F	6.2	6.2	6.2	Willis G.H.; McDowell L.L. Pesticide persistence on foliage. Reviews of Environmental Contamination and Toxicology, 1987, 100, 23-73.
1537	Demeton	O,O-diethyl O-(2-(ethylthio)ethyl) phosphorothioate mixture with O,O-diethyl S-(2-(ethylthio)ethyl) phosphorothioate	8065-48-3	Collard	Brassica oleracea acephala	CA, USA	Leaves	*	F	6.7	6.7	6.7	Willis G.H.; McDowell L.L. Pesticide persistence on foliage. Reviews of Environmental Contamination and Toxicology, 1987, 100, 23-73.
1537	Demeton	O,O-diethyl O-(2-(ethylthio)ethyl) phosphorothioate mixture with O,O-diethyl S-(2-(ethylthio)ethyl) phosphorothioate	8065-48-3	Lettuce	Lactuca sativa	CA, USA	Leaves	*	*	3.9	3.9	3.9	Willis G.H.; McDowell L.L. Pesticide persistence on foliage. Reviews of Environmental Contamination and Toxicology, 1987, 100, 23-73.
1537	Demeton	O,O-diethyl O-(2-(ethylthio)ethyl) phosphorothioate mixture with O,O-diethyl S-(2-(ethylthio)ethyl) phosphorothioate	8065-48-3	Mustard	Brassica juncea L.	FL, USA	Leaves	I	F	4.8	4.8	4.8	Willis G.H.; McDowell L.L. Pesticide persistence on foliage. Reviews of Environmental Contamination and Toxicology, 1987, 100, 23-73.
1537	Demeton	O,O-diethyl O-(2-(ethylthio)ethyl) phosphorothioate mixture with O,O-diethyl S-(2-(ethylthio)ethyl) phosphorothioate	8065-48-3	Orange	Citrus x sinensis	*	Peel	I	F	30	30	30	Metcalf R.L.; March R.B.; Fukuto T R.; Maxon M.G. The nature and significance of Systox residues in plant materials. Journal of Economic Entomology, 1955, 48(4), 364-369.
1537	Demeton	O,O-diethyl O-(2-(ethylthio)ethyl) phosphorothioate mixture with O,O-diethyl S-(2-(ethylthio)ethyl) phosphorothioate	8065-48-3	Potato	Lactuca sativa	*	Tuber	I	F	16	16	16	Metcalf R.L.; March R.B.; Fukuto T R.; Maxon M.G. The nature and significance of Systox residues in plant materials. Journal of Economic Entomology, 1955, 48(4), 364-369.
1537	Demeton	O,O-diethyl O-(2-(ethylthio)ethyl) phosphorothioate mixture with O,O-diethyl S-(2-(ethylthio)ethyl) phosphorothioate	8065-48-3	Tea	Camellia sinensis	*	Leaves	I	F	8	8	8	Zongmao C.; Haibin W. Factors affecting residues of pesticides in tea. Pesticide Science, 1988, 23(2), 109-118.
1537	Demeton	O,O-diethyl O-(2-(ethylthio)ethyl) phosphorothioate mixture with O,O-diethyl S-(2-(ethylthio)ethyl) phosphorothioate	8065-48-3	Turnip	Brassica rapa subsp. Rapa	CA, USA	Leaves	*	F	11.5	11.5	11.5	Willis G.H.; McDowell L.L. Pesticide persistence on foliage. Reviews of Environmental Contamination and Toxicology, 1987, 100, 23-73.
206	Demeton-S-methyl	S-(2-(ethylthio)ethyl) O,O-dimethyl phosphorothioate	213-052-6	Mango	Mangifera indica L.	India	Fruit	I	F	3	3	3	Regupathy A.; Habeebullah B.; Kuttalam S.; Balasubramanian M.; Manavalan R.S.A. Dissipation of dimethoate, methyl demeton and fenthion in mango fruits. International Journal of Entomology, India, 1982, 1(1), 7-9
210	Diafenthiuron	N-(2,6-bis(1-methylethyl)-4-phenoxyphenyl)-N'-(1,1-dimethylethyl)thiourea	80060-09-9	Cardamom (fresh)	Elettaria cardamomum L. Maton	India	Capsules	I	F	1.95	2.82	2.4	Stanley J.; Chandrasekaran S.; Preetha G.; Kuttalam S.; Jasmine R.S. Estimation of Diafenthiuron Residues in Cardamom (Elettaria cardamomum (L.) Maton) Using Normal Phase HPLC: Dissipation Pattern and Safe Waiting Period in Green and Cured Cardamom Capsules. Chromatography Research International, 2014, http://dx.doi.org/10.1155/2014/289747
210	Diafenthiuron	N-(2,6-bis(1-methylethyl)-4-phenoxyphenyl)-N'-(1,1-dimethylethyl)thiourea	80060-09-9	Cardamom (cured)	Elettaria cardamomum L. Maton	India	Capsules	I	F	1.59	3.02	2.31	Rajabaskar D.; Regupathy A. Persistence of Diafenthiuron in Cardamom. Pesticide Research Journal, 2008, 20(2), 247-249.
210	Diafenthiuron	N-(2,6-bis(1-methylethyl)-4-phenoxyphenyl)-N'-(1,1-dimethylethyl)thiourea	80060-09-9	Chinese cabbage	Brassica rapa subsp. pekinensis	Republic of Korea	Leaves	O	U	3.1	3.1	3.1	Keum Y.S.; Liu K.H.; Seo J.S.; Kim J.H.; Kim K.; Kim Y.H.; Kim P.J. Dissipation of foliar residues of diafenthiuron and its metabolites. Bulletin of Environmental Contamination and Toxicology, 2002, 68(6), 845-851.
210	Diafenthiuron	N-(2,6-bis(1-methylethyl)-4-phenoxyphenyl)-N'-(1,1-dimethylethyl)thiourea	80060-09-9	Chinese cabbage	Brassica rapa subsp. pekinensis	Republic of Korea	Leaves	I	U	4.2	4.4	4.3	Keum Y.S.; Liu K.H.; Seo J.S.; Kim J.H.; Kim K.; Kim Y.H.; Kim P.J. Dissipation of foliar residues of diafenthiuron and its metabolites. Bulletin of Environmental Contamination and Toxicology, 2002, 68(6), 845-851.
1101	Dialifos	S-(2-chloro-1-(1,3-dihydro-1,3-dioxo-2H-isoindol-2-yl)ethyl) O,O-diethyl phosphorodithioate	10311-84-9	Grape	Vitis vinifera L.	CA, USA	Fruit	O	F	8.9	13.4	11.1	Knaak J.B.; Peoples S.A.; Jackson T.J.; Fredrickson A.S.; Enos R.; Maddy K.T.; Bailey J.B.; Diisch M.E.; Gunther F.A.; Wintedin W.L. Reentry Problems Involving the Use of Dialifor on Grapes in the San Joaquin Valley of California. Archives of Environmental Contamination and Toxicology, 1978, 7(1), 465-481.
1101	Dialifos	S-(2-chloro-1-(1,3-dihydro-1,3-dioxo-2H-isoindol-2-yl)ethyl) O,O-diethyl phosphorodithioate	10311-84-9	Grape	Vitis vinifera L.	CA, USA	Fruit	I	F	11.5	14.9	13.2	Knaak J.B.; Peoples S.A.; Jackson T.J.; Fredrickson A.S.; Enos R.; Maddy K.T.; Bailey J.B.; Diisch M.E.; Gunther F.A.; Wintedin W.L. Reentry Problems Involving the Use of Dialifor on Grapes in the San Joaquin Valley of California. Archives of Environmental Contamination and Toxicology, 1978, 7(1), 465-481.
1101	Dialifos	S-(2-chloro-1-(1,3-dihydro-1,3-dioxo-2H-isoindol-2-yl)ethyl) O,O-diethyl phosphorodithioate	10311-84-9	Grape	Vitis vinifera L.	CA, USA	Leaves	O	F	11.9	11.9	11.9	Willis G.H.; McDowell L.L. Pesticide persistence on foliage. Reviews of Environmental Contamination and Toxicology, 1987, 100, 23-73.
1101	Dialifos	S-(2-chloro-1-(1,3-dihydro-1,3-dioxo-2H-isoindol-2-yl)ethyl) O,O-diethyl phosphorodithioate	10311-84-9	Lemon	Citrus x limon L. cv. Eureka	CA, USA	Fruit	I	F	60	80	70	Westlake W.E.; Duesch M.E.; Gunther F.A.; Jeppson L.R. Persistence of O,O-diethyl S-(2-chloro-1-phthalimidoethyl)phosphorodithioate (Torak) on and in lemons, oranges, and dried citrus pulp cattle feed, and toxicity of the residues to mites. Journal of Agricultural and Food Chemistry, 1971, 19(6), 1191.
1101	Dialifos	S-(2-chloro-1-(1,3-dihydro-1,3-dioxo-2H-isoindol-2-yl)ethyl) O,O-diethyl phosphorodithioate	10311-84-9	Orange	Citrus x sinensis L. cv. Valencia	CA, USA	Fruit	I	F	40	60	50	Westlake W.E.; Duesch M.E.; Gunther F.A.; Jeppson L.R. Persistence of O,O-diethyl S-(2-chloro-1-phthalimidoethyl)phosphorodithioate (Torak) on and in lemons, oranges, and dried citrus pulp cattle feed, and toxicity of the residues to mites. Journal of Agricultural and Food Chemistry, 1971, 19(6), 1191.
212	Diazinon	O,O-diethyl O-(6-methyl-2-(1-methylethyl)-4-pyrimidinyl) phosphorothioate	333-41-5	Alfalfa	Medicago sativa	Iran	Leaves	I	F	1.8	1.8	1.8	Talebi K. Dissipation of Phosalone and Diazinon in Fresh and Dried Alfalfa. Journal of Environmental Science and Health, 2006, 41(5), 595-603.
212	Diazinon	O,O-diethyl O-(6-methyl-2-(1-methylethyl)-4-pyrimidinyl) phosphorothioate	333-41-5	Annual bluegrass	Poa annua L.	Canada	Turf	I	F	2.6	2.6	2.6	Sears M.K.; Chapman R.A. Persistence and movement of four insecticides applied to turfgrass. Journal of Economic Entomology, 1979, 72(2), 272-274. Calculated
212	Diazinon	O,O-diethyl O-(6-methyl-2-(1-methylethyl)-4-pyrimidinyl) phosphorothioate	333-41-5	Chinese broccoli	Brassica oleracea alboglabra cv. Guy Lon	Canada	Leaves	O	F	2	2.5	2.25	Ripley B.D.; Ritcey G.M.; Harris C.R.; Denommé M.A.; Lissemore L.I. Comparative Persistence of Pesticides on Selected Cultivars of Speciality Vegetables. Journal of Agricultural and Food Chemistry, 2003, 51(5), 1328-1335.
212	Diazinon	O,O-diethyl O-(6-methyl-2-(1-methylethyl)-4-pyrimidinyl) phosphorothioate	333-41-5	Chinese cabbage	Brassica campestris	Republic of Korea	Leaves	I	U	1.3	1.5	1.4	Khay S.; Abd El Aty A.M.; Lim K.T.; Shim J.H. Residues of Diazinon in Growing Chinese cabbage: A study Under Greenhouse Conditions. Korean Journal of Environmental Agriculture, 2006, 25(2), 174-179.
212	Diazinon	O,O-diethyl O-(6-methyl-2-(1-methylethyl)-4-pyrimidinyl) phosphorothioate	333-41-5	Cotton	Gossypium hirsutum L.	AZ, USA	Leaves	O	F	1.2	2.5	1.85	Willis G.H.; McDowell L.L. Pesticide persistence on foliage. Reviews of Environmental Contamination and Toxicology, 1987, 100, 23-73.
212	Diazinon	O,O-diethyl O-(6-methyl-2-(1-methylethyl)-4-pyrimidinyl) phosphorothioate	333-41-5	Endive	Cichorium endivia	Canada	Leaves	I	F	2.2	2.2	2.2	Willis G.H.; McDowell L.L. Pesticide persistence on foliage. Reviews of Environmental Contamination and Toxicology, 1987, 100, 23-73.
212	Diazinon	O,O-diethyl O-(6-methyl-2-(1-methylethyl)-4-pyrimidinyl) phosphorothioate	333-41-5	Kale	Brassica oleracea var. Sabellica	DC, USA	Leaves	I	F	5.3	5.3	5.3	Willis G.H.; McDowell L.L. Pesticide persistence on foliage. Reviews of Environmental Contamination and Toxicology, 1987, 100, 23-73.
212	Diazinon	O,O-diethyl O-(6-methyl-2-(1-methylethyl)-4-pyrimidinyl) phosphorothioate	333-41-5	Kentucky bluegrass	Poa pratensis L.	Canada	Blades	O	F	1.1	5.4	3.25	Sears M.K.; Bowhey C.; Braun H.; Stephenson G.R. Dislodgeable residues and persistence of diazinon, chlorpyrifos and isofenphos following their application to turfgrass. Pesticide Science, 1987, 20(3), 223-231.
212	Diazinon	O,O-diethyl O-(6-methyl-2-(1-methylethyl)-4-pyrimidinyl) phosphorothioate	333-41-5	Kentucky bluegrass	Poa pratensis L.	NY, USA	Blades	I	F	5.3	6.9	6.1	Kuhr R.J.; Tashiro H. Distribution and persistence of chlorpyrifos and diazinon applied to turf. Bulletin of Environmental Contamination and Toxicology, 1978, 20(1), 652-656.
212	Diazinon	O,O-diethyl O-(6-methyl-2-(1-methylethyl)-4-pyrimidinyl) phosphorothioate	333-41-5	Maize	Zea mays L.	IA, USA	Leaves	I	F	0.4	1.8	1.1	Willis G.H.; McDowell L.L. Pesticide persistence on foliage. Reviews of Environmental Contamination and Toxicology, 1987, 100, 23-73.
212	Diazinon	O,O-diethyl O-(6-methyl-2-(1-methylethyl)-4-pyrimidinyl) phosphorothioate	333-41-5	Norway maple	Acer platanoides	MS, USA	Leaf litter	O	F	2.13	8.25	5.19	Moore M.T.; Lizotte R.E.; Smith S. Toxicity Evaluation of Diazinon Contaminated Leaf Litter. Bulletin of Environmental Contamination and Toxicology, 2007, 78(2), 168-171. Calculated.
212	Diazinon	O,O-diethyl O-(6-methyl-2-(1-methylethyl)-4-pyrimidinyl) phosphorothioate	333-41-5	Olive	Olea europaea cv. Yacouti	Italy	Fruit	I	F	9.6	9.6	9.6	Cabras P.; Angioni A.; Garau V.L.; Melis M.; Pirisi F.M.; Karim M.; Minelli E.V. Persistence of insecticide residues in olives and olive oil. Journal of Agricultural and Food Chemistry, 1997, 45(6), 2244-2247.
212	Diazinon	O,O-diethyl O-(6-methyl-2-(1-methylethyl)-4-pyrimidinyl) phosphorothioate	333-41-5	Peach	Prunus persica	Brazil	Fruit	I	F	5.2	5.2	5.2	Minelli E.V.; Angioni A.; Cabras P.; Garau V.L.; Melis M.; Pirisi F.M.; Cabitza F.; Cubeddu M. Persistence of some pesticides in peach fruit. Italian Journal of Food Science, 1996, 8(1), 57-62.
212	Diazinon	O,O-diethyl O-(6-methyl-2-(1-methylethyl)-4-pyrimidinyl) phosphorothioate	333-41-5	Spring onion	Allium fistulosum L.	Venezuela	Leaves	I	X (growing trays - barbacoas)	1.03	1.03	1.03	Ettiene G.; Ortega S.; Sepúlveda J.; Medina D.; Buscema I.; Sandoval L. Dissipation of Organophosphorus Pesticides in Green Onion (Allium fistulosum L), Cultivated in Forced System Called "Barbacoas". Bulletin of Environmental Contamination and Toxicology, 2006, 76(3), 415-421.
212	Diazinon	O,O-diethyl O-(6-methyl-2-(1-methylethyl)-4-pyrimidinyl) phosphorothioate	333-41-5	Tomato	Lycopersicon esculentum Mill.	*	Leaves	O	F	0.8	0.8	0.8	Antonious G.F. Residues and Half-Lives of Pyrethrins on Field-Grown Pepper and Tomato. Journal of Environmental Science and Health, 2005, 39(4), 491-503.
212	Diazinon	O,O-diethyl O-(6-methyl-2-(1-methylethyl)-4-pyrimidinyl) phosphorothioate	333-41-5	Tomato	Lycopersicon esculentum Mill. cv. Rio Grande	Venezuela	Fruit	I	F	1.14	1.14	1.14	Prieto A.; Molero D.; González G.; Buscema I.; Ettiene G.; Medina D. Persistence of Methamidophos, Diazinon, and Malathion in Tomatoes. Bulletin of Environmental Contamination and Toxicology, 2002, 69(4), 479-485.
212	Diazinon	O,O-diethyl O-(6-methyl-2-(1-methylethyl)-4-pyrimidinyl) phosphorothioate	333-41-5	Tomato	Lycopersicon esculentum Mill.	OH, USA	Fruit	O	U	0.8	0.8	0.8	Lindquist R.K.; Krueger H.R. Application of acephate to greenhouse tomatoes: External vs. internal foliage residues, and vegetable leafminer control. Journal of Economic Entomology, 1975, 68(1), 122-123. THIS IS PROBABLY Lindquist, R. K., Krueger, H. R., Mason, J. F., & Spadafora, R. R. (1973). Application of diazinon to greenhouse tomatoes: vegetable leaf miner control and residues in foliage an…
212	Diazinon	O,O-diethyl O-(6-methyl-2-(1-methylethyl)-4-pyrimidinyl) phosphorothioate	333-41-5	Turfgrass	*	USA	Blades	I	X (in compost)	2.1	4.1	3.1	Lemmon C.R.; Pylypiw H.M. Degradation of diazinon, chlorpyrifos, isofenphos, and pendimethalin in grass and compost. Bulletin of Environmental Contamination and Toxicology, 1992, 48(3), 409-415.
212	Diazinon	O,O-diethyl O-(6-methyl-2-(1-methylethyl)-4-pyrimidinyl) phosphorothioate	333-41-5	Wheat	Triticum aestivum L.	TX, USA	Leaves	I	F	5	5	5	Willis G.H.; McDowell L.L. Pesticide persistence on foliage. Reviews of Environmental Contamination and Toxicology, 1987, 100, 23-73.
213	Dicamba	3,6-dichloro-2-methoxybenzoic acid	1918-00-9	Kentucky bluegrass	Poa pratensis L.	Canada	Thatch	I	F	5.5	23.2	8.5	Roy J.W.; Hall J.C.; Parkin G.W.; Wagner-Riddle C.; Clegg B.S. Seasonal leaching and biodegradation of dicamba in turfgrass. Journal of Environmental Quality, 2001, 30(4), 1360-1370.
213	Dicamba	3,6-dichloro-2-methoxybenzoic acid	1918-00-9	Kentucky bluegrass	Poa pratensis L.	Iowa, USA	Thatch	I	F	2.4	3.3	2.85	Starrett S.K.; Christians N.E.; Al Austin T. Movement of herbicides under two irrigation regimes applied to turfgrass. Advances in Environmental Research, 2000, 4(2), 169-176.
213	Dicamba	3,6-dichloro-2-methoxybenzoic acid	1918-00-9	Grass	*	AZ, USA	Blades	O	F	8.3	10.7	9.5	Willis G.H.; McDowell L.L. Pesticide persistence on foliage. Reviews of Environmental Contamination and Toxicology, 1987, 100, 23-73.
216	Dichlofluanid	1,1-dichloro-N-((dimethylamino)sulfonyl)-1-fluoro-N-phenylmethanesulfenamide	1085-98-9	Grape	Vitis vinifera L. var. Tempranillo	Spain	Fruit	I	F	21	25.67	23.34	Vaquero-Fernández L.; Sanz-Asensio J.; López-Alonso M.; Martínez-Soria M.T. Fate and distribution of pyrimethanil, metalaxyl, dichlofluanid and penconazol fungicides from treated grapes intended for winemaking. Food Additives and Contaminants, 2009, 26(2), 164-171.
216	Dichlofluanid	1,1-dichloro-N-((dimethylamino)sulfonyl)-1-fluoro-N-phenylmethanesulfenamide	1085-98-9	Strawberry	Fragaria x ananassa	New Zealand	Fruit	O	F	5	7	6	Tate K.G.; van der Mespel G.J.; Brewerton H.V.; Gibbs M.M.; McGrath H.J.W. Dichlofluanid ('Euparen') residues on strawberries. New Zealand Journal of Experimental Agriculture, 1973, 1(1), 100-104.
216	Dichlofluanid	1,1-dichloro-N-((dimethylamino)sulfonyl)-1-fluoro-N-phenylmethanesulfenamide	1085-98-9	Strawberry	Fragaria x ananassa var. Senga Sengana	Czechoslovakia	Fruit	O	F	7.5	7.6	7.55	Seifert J.; Blattny C.; Henzlerová H.; Davídek J. Persistence of fungicide euparen on strawberry and/or in some canned products of strawberry. Bulletin of Environmental Contamination and Toxicology, 1978, 20(1), 702-706.
219	Dichlorprop-P	(2R)-2-(2,4-dichlorophenoxy)propanoic acid	15165-67-0	Wheat	Triticum aestivum L.	China	Combined plant, straw & seed	I	F	1.9	2.5	2.2	Feng X.; Yu J.; Pan L.; Song G.; Zhang H. Dissipation and Residues of Dichlorprop-P and Bentazone in Wheat-Field Ecosystem. International Journal of Environmental Research and Public Health, 2016, 13(6), 534
220	Dichlorvos	2,2-dichloroethenyl dimethyl phosphate	62-73-7	Apple	Malus pumila Mill.	India	Fruit	I	F	2.2	2.2	2.2	Sharma I.D.; Nath A. Persistence of different pesticides in apple. ISHS Acta Horticulturae, 2005, 696, 437-440.
220	Dichlorvos	2,2-dichloroethenyl dimethyl phosphate	62-73-7	Cabbage	Brassica oleracea capitata	China	Leaves	I	F	1.2	1.6	1.4	Li W.; Ma Y.; Li L.; Qin D.-M.; Wu Y.-J. The dissipation rates of trichlorfon and its degradation product dichlorvos in cabbage and soil. Chemosphere, 2011, 82(6), 829-833.
220	Dichlorvos	2,2-dichloroethenyl dimethyl phosphate	62-73-7	Cauliflower	Brassica oleracea botrytis var. Snowball-16		Curd	I	F	2.08	2.08	2.08	Deivendran A.; Kumari B.; Yadav G.S. Dissipation of Endosulfan and Dichlorvos Residues In/On Cauliflower Curds. Environmental Monitoring and Assessment, 2006, 116(1-3), 307-313.
220	Dichlorvos	2,2-dichloroethenyl dimethyl phosphate	62-73-7	Chrysanthemum	Chrysanthemum morifolium	*	Leaves	O	U	0.2	0.2	0.2	Brouwer D.H.; de Haan M.; Leenheers L.H.; de Vreede S.A.F.; van Hemmen J.J. Half-Lives of Pesticides on Greenhouse Crops. Bulletin of Environmental Contamination and Toxicology, 1997, 58(6), 976-984.
220	Dichlorvos	2,2-dichloroethenyl dimethyl phosphate	62-73-7	Cucumber	Cucumis sativus L.	China	Fruit	I	U	3.48	3.48	3.48	Liang Y.; Wang W.; Shen Y.; Liu Y.; Liu X.J. Dynamics and residues of chlorpyrifos and dichlorvos in cucumber grown in greenhouse. Food Control, 2012, 26(2), 231-234.
220	Dichlorvos	2,2-dichloroethenyl dimethyl phosphate	62-73-7	Tea	Camellia sinensis	*	Leaves	I	F	0.2	0.2	0.2	Zongmao C.; Haibin W. Factors affecting residues of pesticides in tea. Pesticide Science, 1988, 23(2), 109-118.
221	Diclofop-methyl	methyl 2-(4-(2,4-dichlorophenoxy)phenoxy)propanoate	51338-27-3	Chinese cabbage	Brassica rapa subsp. pekinensis	China	Leaves	I	F	1.27	1.48	1.38	Gu X.; Wang P.; Liu D.; Lu Y.; Zhou Z. Stereoselective degradation of diclofop-methyl in soil and Chinese cabbage. Pesticide Biochemistry and Physiology, 2008, 92(1), 1-7.
222	Dicloran	2,6-dichloro-4-nitrobenzenamine	99-30-9	Lettuce	Lactuca sativa	Belgium	Leaves	I	F	13.86	33.01	23.44	Dejonckheere W.; Steurbaut W.; Kips R.H. Residues of quintozene, hexachlorobenzene, dichloran and pentachloroaniline in soil and lettuce. Bulletin of Environmental Contamination and Toxicology, 1975, 13(6), 720-729. Calculated.
223	Dicofol	4-chloro-alpha-(4-chlorophenyl)-alpha-(trichloromethyl)benzenemethanol	115-32-2	Alfalfa	Medicago sativa	CA, USA	Leaves	O	F	6	6	6	Akesson N.B.; Yates W.E. Problems relating to application of agricultural chemicals and resulting drift residues. Annual Review of Entomology, 9, 285-318
223	Dicofol	4-chloro-alpha-(4-chlorophenyl)-alpha-(trichloromethyl)benzenemethanol	115-32-2	Cucumber	Cucumis sativus L.	India	Fruit	O	F	1.4	1.9	1.65	Singh B.; Singh B.; Battu R.S.; Jyot G. Persistence of Dicofol Residues on Cucumber, Cucumis sativus (Linn.). Pesticide Research Journal, 2007, 19(2), 244-245.
223	Dicofol	4-chloro-alpha-(4-chlorophenyl)-alpha-(trichloromethyl)benzenemethanol	115-32-2	Cucumber	Cucumis sativus L.	*	Fruit	O	U	5	5	5	Goedicke H.J. Rückstandstoxicologische Bewertungen des Einsetzes von Pflanzenschutzmittelen und Mitteln zur Steurung Biologische Prozesse in Gemüseunter Glas und Plasten [Residue based toxicological considerations for the use of pesticides in greenhouse crops] Die Nahrung, 1988, 32, 565-570.
223	Dicofol	4-chloro-alpha-(4-chlorophenyl)-alpha-(trichloromethyl)benzenemethanol	115-32-2	Lemon	Citrus x limon	*	Leaves	O	U	3.8	3.8	3.8	Mestres R.; Francois C.; Causse C.; Vian L.; Winnett G. Survey of exposure to pesticides in greenhouses. Bulletin of Environmental Contamination and Toxicology, 1985, 35(1), 750-756.
223	Dicofol	4-chloro-alpha-(4-chlorophenyl)-alpha-(trichloromethyl)benzenemethanol	115-32-2	Lime (acid)	Citrus latifolia T.	India	Fruit	I	F	2.7	2.9	2.8	Mohapatra S.; Rekha A. Persistence of Dicofol Residues in/on Acid Lime. Pesticide Research Journal, 2005, 17(1), 64-65.
223	Dicofol	4-chloro-alpha-(4-chlorophenyl)-alpha-(trichloromethyl)benzenemethanol	115-32-2	Pepper (green chilli)	Capsicum annuum L.	India	Fruit	O	F	1.84	2.03	1.94	Vijayalakshmi K.; Kuttalam S.; Chandrasekaran S.; Regupathy A. Dissipation of Dicofol on Green Chillies. Pesticide Research Journal, 1998, 10(1), 98-100.
223	Dicofol	4-chloro-alpha-(4-chlorophenyl)-alpha-(trichloromethyl)benzenemethanol	115-32-2	Pepper	Capsicum annuum L.	India	Fruit	I	F	2.24	2.97	2.61	Pal R.; Das P.; Das C.; Sarkar M.A.; Chowdhury A. Degradation and kinetics safety constants of a new formulation of dicofol in Chilli. Pestology, 2005, 29(1), 6-8.
223	Dicofol	4-chloro-alpha-(4-chlorophenyl)-alpha-(trichloromethyl)benzenemethanol	115-32-2	Tea	Camellia sinensis L. cv. TV1, S3A3	India	Shoots	I	X (under tree shade)	2.7	2.7	2.7	Barooah A.K.; Borthakur M. Dissipation of Pesticides in Tea Shoots and the Effect of Washing. Pesticide Research Journal, 2008, 20(1), 121-124.
223	Dicofol	4-chloro-alpha-(4-chlorophenyl)-alpha-(trichloromethyl)benzenemethanol	115-32-2	Tea	Camellia sinensis L.	China	Leaves	O	F	3.85	3.85	3.85	Zongmao C.; Haibin W. Degradation of Pesticides on Plant Surfaces and its Prediction - A Case Study on Tea Plant. Environmental Monitoring and Assessment, 1997, 44(1-3), 303-313.
224	Dicrotophos	(1E)-3-(dimethylamino)-1-methyl-3-oxo-1-propenyl dimethyl phosphate	141-66-2	Cotton	Gossypium hirsutum L.	*	Leaves	O	F	1	1	1	Bull D.L.; Lindquist D.A. Insecicide metabolism. Metabolism of 3-hydroxy-N,N-dimethylcrotonamide dimethyl phosphate by cotton plants, insects and rats. Journal of Agricultural and Food Chemistry, 1964, 12, 310–317.
226	Dieldrin	(1aR,2R,2aS,3S,6R,6aR,7S,7aS)-rel-3,4,5,6,9,9-hexachloro-1a,2,2a,3,6,6a,7,7a-octahydro-2,7:3,6-dimethanonaphth(2,3-b)oxirene	60-57-1	Alfalfa	Medicago sativa	NC, USA	Leaves	I	F	4.2	6.8	5.5	Willis G.H.; McDowell L.L. Pesticide persistence on foliage. Reviews of Environmental Contamination and Toxicology, 1987, 100, 23-73.
226	Dieldrin	(1aR,2R,2aS,3S,6R,6aR,7S,7aS)-rel-3,4,5,6,9,9-hexachloro-1a,2,2a,3,6,6a,7,7a-octahydro-2,7:3,6-dimethanonaphth(2,3-b)oxirene	60-57-1	Apple	Malus pumila Mill.	*	Leaves	I	F	10	10	10	Gunther F.A.; Blinn R.C. Persisting Insecticide Residues in Plant Materials. Annual Review of Entomology, 1956, 1, 167-180.
226	Dieldrin	(1aR,2R,2aS,3S,6R,6aR,7S,7aS)-rel-3,4,5,6,9,9-hexachloro-1a,2,2a,3,6,6a,7,7a-octahydro-2,7:3,6-dimethanonaphth(2,3-b)oxirene	60-57-1	Apple	Malus pumila Mill. cv. Cox's Orange Pippin	UK	Leaves	O	F	7	7	7	Harrison R.B.; Holmes D.C.; Roburn J.; Tatton J.O.G. The fate of some organochlorine pesticides on leaves. Journal of the Science of Food and Agriculture, 1967, 18, 10–15.
226	Dieldrin	(1aR,2R,2aS,3S,6R,6aR,7S,7aS)-rel-3,4,5,6,9,9-hexachloro-1a,2,2a,3,6,6a,7,7a-octahydro-2,7:3,6-dimethanonaphth(2,3-b)oxirene	60-57-1	Clover	Trifolium spp.	*	Leaves	I	F	6	6	6	Gunther F.A.; Blinn R.C. Persisting Insecticide Residues in Plant Materials. Annual Review of Entomology, 1956, 1, 167-180.
226	Dieldrin	(1aR,2R,2aS,3S,6R,6aR,7S,7aS)-rel-3,4,5,6,9,9-hexachloro-1a,2,2a,3,6,6a,7,7a-octahydro-2,7:3,6-dimethanonaphth(2,3-b)oxirene	60-57-1	Lemon	Citrus x limon	CA, USA	Peel	I	F	6.5	6.5	6.5	Blinn R.C.; Carman G.E.; Ewart W.H.; Gunther F.A.. Residual Behavior of Various Insecticides on and in Lemons and Oranges. Journal of Economic Entomology, 1959, 52(1), 42-44.
226	Dieldrin	(1aR,2R,2aS,3S,6R,6aR,7S,7aS)-rel-3,4,5,6,9,9-hexachloro-1a,2,2a,3,6,6a,7,7a-octahydro-2,7:3,6-dimethanonaphth(2,3-b)oxirene	60-57-1	Orange	Citrus x sinensis	CA, USA	Fruit	I	F	2	2	2	Ewart W.H.; Gunther F.A.; Barkley J.H.; Elmer H.S. Control of citrus thrips with dieldrin. Journal of Economic Entomology, 1952, 45(4), 578-593.
226	Dieldrin	(1aR,2R,2aS,3S,6R,6aR,7S,7aS)-rel-3,4,5,6,9,9-hexachloro-1a,2,2a,3,6,6a,7,7a-octahydro-2,7:3,6-dimethanonaphth(2,3-b)oxirene	60-57-1	Orchard grass	*	MD, USA	Blades	I	F	2.7	2.7	2.7	Willis G.H.; McDowell L.L. Pesticide persistence on foliage. Reviews of Environmental Contamination and Toxicology, 1987, 100, 23-73.
226	Dieldrin	(1aR,2R,2aS,3S,6R,6aR,7S,7aS)-rel-3,4,5,6,9,9-hexachloro-1a,2,2a,3,6,6a,7,7a-octahydro-2,7:3,6-dimethanonaphth(2,3-b)oxirene	60-57-1	Peach	Prunus persica	IL, USA	Leaves	O	F	6.5	6.5	6.5	Willis G.H.; McDowell L.L. Pesticide persistence on foliage. Reviews of Environmental Contamination and Toxicology, 1987, 100, 23-73.
226	Dieldrin	(1aR,2R,2aS,3S,6R,6aR,7S,7aS)-rel-3,4,5,6,9,9-hexachloro-1a,2,2a,3,6,6a,7,7a-octahydro-2,7:3,6-dimethanonaphth(2,3-b)oxirene	60-57-1	Peach	Prunus persica	*	Leaves	I	F	7	7	7	Weinman C.J. Effect of early season sprays against plum curculio on peaches. Journal of Economic Entomology, 1952, 45(4), 646-651
226	Dieldrin	(1aR,2R,2aS,3S,6R,6aR,7S,7aS)-rel-3,4,5,6,9,9-hexachloro-1a,2,2a,3,6,6a,7,7a-octahydro-2,7:3,6-dimethanonaphth(2,3-b)oxirene	60-57-1	Peach	Prunus persica	*	Fruit	I	F	8	8	8	Weinman C.J. Effect of early season sprays against plum curculio on peaches. Journal of Economic Entomology, 1952, 45(4), 646-651
228	Diethofencarb	1-methylethyl (3,4-diethoxyphenyl)carbamate	87130-20-9	Spring onion	Allium fistulosum L.	China	Whole plant	I	F	3.1	3.1	3.1	Cui S.-H.; Wang K.-Y.; Qian J.-l.; Zhang L.-D.; Liu J.-F.; Xu M.-l. Field residue decline study of pyrimethanil and diethofencarb in welsh onion. Chinese Journal of Pesticide Science, 2010, 12(2), 195-200.
230	Difenoconazole	1-(2-(2-chloro-4-(4-chlorophenoxy)phenyl)-4-methyl-1,3-dioxolan-2-ylmethyl)-1H-1,2,4-triazole	119446-68-3	Apple	Malus pumila Mill. var. Changfu4, Red fuji, Golden delicious & Red star	China	Fruit	I	F	6.3	11.4	8.85	Guo C.; Li J.-Z.; Guo B.-Y.; Wang H.-l. Determination and Safety Evaluation of Difenoconazole Residues in Apples and Soils. Bulletin of Environmental Contamination and Toxicology, 2010, 85(4), 427-431.
230	Difenoconazole	1-(2-(2-chloro-4-(4-chlorophenoxy)phenyl)-4-methyl-1,3-dioxolan-2-ylmethyl)-1H-1,2,4-triazole	119446-68-3	Apple	Malus pumila Mill. var. Starkrimson	India	Fruit	I	F	6.09	6.09	6.09	Bhat M.; Wani A.A.; Mukhtar M.; Sherwani A.; Bhat A.H.; Showkat A. Dissipation patterns of the fungicide difenoconazole (25% EC) in apples grown in Kashmir, India. Environmental Monitoring and Assessment, 2015, 187(7), 398.
230	Difenoconazole	1-(2-(2-chloro-4-(4-chlorophenoxy)phenyl)-4-methyl-1,3-dioxolan-2-ylmethyl)-1H-1,2,4-triazole	119446-68-3	Apple	Malus pumila Mill. var. Golden delicious	India	Fruit	I	F	6.7	6.7	6.7	Bhat M.; Wani A.A.; Mukhtar M.; Sherwani A.; Bhat A.H.; Showkat A. Dissipation patterns of the fungicide difenoconazole (25% EC) in apples grown in Kashmir, India. Environmental Monitoring and Assessment, 2015, 187(7), 398.
230	Difenoconazole	1-(2-(2-chloro-4-(4-chlorophenoxy)phenyl)-4-methyl-1,3-dioxolan-2-ylmethyl)-1H-1,2,4-triazole	119446-68-3	Apple	Malus pumila Mill. Var. Jonagold Decosta, Gala & Idared	Poland	Fruit	I	F	12	21	16.5	Szpyrka E.; Walorczyk S. Dissipation of difenoconazole in apples used for production of baby food. Journal of Environmental Science and Health, Part B, 2017, 52(2), 131-137.
230	Difenoconazole	1-(2-(2-chloro-4-(4-chlorophenoxy)phenyl)-4-methyl-1,3-dioxolan-2-ylmethyl)-1H-1,2,4-triazole	119446-68-3	Apple	Malus pumila Mill.	China	Fruit	I	X (post harvest, unbagged)	12.8	15.5	14.2	Qui W.; Wang Y.N.; Wei T.; Liu Y.; Zhang Y.; Cao K. Residue and dissipation dynamics of difenoconazole in bagged and non-bagged apples. Chinese Journal of Pesticide Science, 2013, 4, 019.
230	Difenoconazole	1-(2-(2-chloro-4-(4-chlorophenoxy)phenyl)-4-methyl-1,3-dioxolan-2-ylmethyl)-1H-1,2,4-triazole	119446-68-3	Apple	Malus pumila Mill.	China	Fruit	I	X (post harvest, bagged)	31.9	31.9	31.9	Qui W.; Wang Y.N.; Wei T.; Liu Y.; Zhang Y.; Cao K. Residue and dissipation dynamics of difenoconazole in bagged and non-bagged apples. Chinese Journal of Pesticide Science, 2013, 4, 019.
230	Difenoconazole	1-(2-(2-chloro-4-(4-chlorophenoxy)phenyl)-4-methyl-1,3-dioxolan-2-ylmethyl)-1H-1,2,4-triazole	119446-68-3	Banana	Musa spp.	China	Whole fruit	I	F	8.4	10.7	9.6	Huan Z.; Xu Z.; Lv D.; Xie D.; Luo J. Dissipation and residues of difenoconazole and azoxystrobin in bananas and soil in two agro-climatic zones of China. Bulletin of Environmental Contamination and Toxicology, 2013, 91(6), 734-738.
230	Difenoconazole	1-(2-(2-chloro-4-(4-chlorophenoxy)phenyl)-4-methyl-1,3-dioxolan-2-ylmethyl)-1H-1,2,4-triazole	119446-68-3	Chinese cabbage	Brassica rapa subsp. pekinensis	China	Leaves	I	F	6.6	7.8	7.2	Wang Z.H.; Yang T.; Qin D.M.; Gong Y. Ji Y. Determination and dynamics of difenoconazole residues in Chinese cabbage and soil. Chinese Chemical Letters, 2008, 19(8), 969-972.
230	Difenoconazole	1-(2-(2-chloro-4-(4-chlorophenoxy)phenyl)-4-methyl-1,3-dioxolan-2-ylmethyl)-1H-1,2,4-triazole	119446-68-3	Gojiberry	Lycium barbarum	China	Fruit	I	F	3.4	3.4	3.4	Fu Y.; Yang T.; Zhao J.; Zhang L.; Chen R.; Wu Y. Determination of eight pesticides in Lycium barbarum by LC-MS/MS and dietary risk assessment. Food Chemistry, 2017, 218, 192-198.
230	Difenoconazole	1-(2-(2-chloro-4-(4-chlorophenoxy)phenyl)-4-methyl-1,3-dioxolan-2-ylmethyl)-1H-1,2,4-triazole	119446-68-3	Grape	Vitis vinifera L. cv. Thompson Seedless	India	Fruit	I	F	4.4	5.5	4.9	Banerjee K.; Oulkar D.P.; Patil S.H.; Dasgupta S.; Adsule P.G. Degradation kinetics and safety evaluation of tetraconazole and difenoconazole residues in grape. Pest Management Science, 2008, 64(3), 283-289.
230	Difenoconazole	1-(2-(2-chloro-4-(4-chlorophenoxy)phenyl)-4-methyl-1,3-dioxolan-2-ylmethyl)-1H-1,2,4-triazole	119446-68-3	Grape	Vitis vinifera L. cv. Thompson Seedless	India	Fruit	I	F	4.5	5.5	5	Gao C.; Zhang X.X.; Qin H.L.; Li X.S.; Zeng D.Q.; Tan H.H. The Residues and Dissipation of Difenoconazole in Grape. Agrochemicals, 2013, 3, 015
230	Difenoconazole	1-(2-(2-chloro-4-(4-chlorophenoxy)phenyl)-4-methyl-1,3-dioxolan-2-ylmethyl)-1H-1,2,4-triazole	119446-68-3	Lemon	Citrus x limon	China	Peel	I	F	7.95	12.65	10.3	Wang J.; Wen J.-J.; Bian X.-l.; Hua R.-M. Study on Residue Dynamics of Difenoconazole in Citrus and Soil and Its Safety Evaluation. Southwest China Journal of Agricultural Sciences, 2009, 22(3), 644-647.
230	Difenoconazole	1-(2-(2-chloro-4-(4-chlorophenoxy)phenyl)-4-methyl-1,3-dioxolan-2-ylmethyl)-1H-1,2,4-triazole	119446-68-3	Lemon	Citrus x limon	China	Pulp	I	F	8.16	12.16	10.16	Wang J.; Wen J.-J.; Bian X.-l.; Hua R.-M. Study on Residue Dynamics of Difenoconazole in Citrus and Soil and Its Safety Evaluation. Southwest China Journal of Agricultural Sciences, 2009, 22(3), 644-647.
230	Difenoconazole	1-(2-(2-chloro-4-(4-chlorophenoxy)phenyl)-4-methyl-1,3-dioxolan-2-ylmethyl)-1H-1,2,4-triazole	119446-68-3	Lemon	Citrus x limon	China	Fruit	I	F	8.88	12.24	10.56	Wang J.; Wen J.-J.; Bian X.-l.; Hua R.-M. Study on Residue Dynamics of Difenoconazole in Citrus and Soil and Its Safety Evaluation. Southwest China Journal of Agricultural Sciences, 2009, 22(3), 644-647.
230	Difenoconazole	1-(2-(2-chloro-4-(4-chlorophenoxy)phenyl)-4-methyl-1,3-dioxolan-2-ylmethyl)-1H-1,2,4-triazole	119446-68-3	Passion fruit (yellow)	Passiflora edulis f. flavicarpa Degener	Columbia	Fruit	I	F	9.5	9.5	9.5	Juraske R.; Fantke P.; Romero Ramírez A.C.; González A. Pesticide residue dynamics in passion fruits: Comparing field trial and modeling results. Chemosphere, 2012, 89, 850-855.
230	Difenoconazole	1-(2-(2-chloro-4-(4-chlorophenoxy)phenyl)-4-methyl-1,3-dioxolan-2-ylmethyl)-1H-1,2,4-triazole	119446-68-3	Pear	Pyrus communis	China	Fruit	I	F	5.66	7.27	6.47	Wang J.; Hua R.M.; Wen J.J.; Jiang H. Residuedynamics of difenoconazole in pear and soil and its safety evaluation. Agrochemicals, 2008, 47(8), 601-603.
230	Difenoconazole	1-(2-(2-chloro-4-(4-chlorophenoxy)phenyl)-4-methyl-1,3-dioxolan-2-ylmethyl)-1H-1,2,4-triazole	119446-68-3	Pepper (chilli)	Capsicum annuum	India	Fruit	I	F	2.12	2.32	2.21	Mukhopadhyay S.; Das S.; Bhattacharyya A.; Pal S. Dissipation Study of Difenoconazole in/on Chili Fruit and Soil in India. Bulletin of Environmental Contamination and Toxicology, 2001, 87(1), 54-57.
230	Difenoconazole	1-(2-(2-chloro-4-(4-chlorophenoxy)phenyl)-4-methyl-1,3-dioxolan-2-ylmethyl)-1H-1,2,4-triazole	119446-68-3	Perilla	Perilla frutescens	China	Leaves	I	U	1.21	1.21	1.065	Sun C.; Zhang H.; Tang T.; Qian M.; Yuan Y.; Zhang Z. Comparison of Greenhouse and Field Degradation Behaviour of Isoprocarb, Hexaflumuron and Difenoconazole in Perilla frutescens. Bulletin of Environmental Contamination and Toxicology, 2012, 89(4), 868-872.
230	Difenoconazole	1-(2-(2-chloro-4-(4-chlorophenoxy)phenyl)-4-methyl-1,3-dioxolan-2-ylmethyl)-1H-1,2,4-triazole	119446-68-3	Perilla	Perilla frutescens	China	Leaves	I	F	0.92	0.92	0.9	Sun C.; Zhang H.; Tang T.; Qian M.; Yuan Y.; Zhang Z. Comparison of Greenhouse and Field Degradation Behaviour of Isoprocarb, Hexaflumuron and Difenoconazole in Perilla frutescens. Bulletin of Environmental Contamination and Toxicology, 2012, 89(4), 868-872.
230	Difenoconazole	1-(2-(2-chloro-4-(4-chlorophenoxy)phenyl)-4-methyl-1,3-dioxolan-2-ylmethyl)-1H-1,2,4-triazole	119446-68-3	Pomegranate	Punica granatum L. cv. Bhagwa	India	Fruit	I	F	4	16	20	Utture, S. C., Banerjee, K., Dasgupta, S., Patil, S. H., Jadhav, M. R., Wagh, S. S., ... & Adsule, P. G. (2011). Dissipation and distribution behavior of azoxystrobin, carbendazim, and difenoconazole in pomegranate fruits. Journal of Agricultural and Food Chemistry, 59(14), 7866-7873.
230	Difenoconazole	1-(2-(2-chloro-4-(4-chlorophenoxy)phenyl)-4-methyl-1,3-dioxolan-2-ylmethyl)-1H-1,2,4-triazole	119446-68-3	Pomegranate	Punica granatum	India	Fruit	O	F	6.4	8.4	7.4	Mohapatra S. (2016). Dynamics of difenoconazole and propiconazole residues on pomegranate over 2 years under field conditions. Environmental Science and Pollution Research, 23(6), 5795-5806.
230	Difenoconazole	1-(2-(2-chloro-4-(4-chlorophenoxy)phenyl)-4-methyl-1,3-dioxolan-2-ylmethyl)-1H-1,2,4-triazole	119446-68-3	Rice	Oryza sativa	China	Whole plant	I	F	4.08	4.08	4.08	Hu R.; Gong D.; Shen F.; Li J. Residue Dynamics of difenoconazole and propiconazole in Paddy Field. Pesticide Science and Administration, 2010, 31(5), 30-34.
230	Difenoconazole	1-(2-(2-chloro-4-(4-chlorophenoxy)phenyl)-4-methyl-1,3-dioxolan-2-ylmethyl)-1H-1,2,4-triazole	119446-68-3	Tomato	Lycopersicon esculentum Mill.	China	Fruit	I	F	3.3	3.8	3.55	An J.-J.; Liu X.-G.; Dong F.-S.; Wang X.; Zheng Y.-Q. Dynamic analysis of difenoconazole residue in tomatoes and soil. Research of Environmental Sciences, 2009, 22(7), 868-872.
230	Difenoconazole	1-(2-(2-chloro-4-(4-chlorophenoxy)phenyl)-4-methyl-1,3-dioxolan-2-ylmethyl)-1H-1,2,4-triazole	119446-68-3	Wheat	Triticum aestivum L.	China	Straw	I	F	3.6	5.5	4.55	Zhang Z.; Jiang W.; Jian Q.; Song W.; Zheng Z.; Wang D.; Liu X. Residues and dissipation kinetics of triazole fungicides difenoconazole and propiconazole in wheat and soil in Chinese fields. Food Chemistry, 2015, 168, 396-403
234	Diflubenzuron	N-(((4-chlorophenyl)amino)carbonyl)-2,6-difluorobenzamide	35367-38-5	Cotton	Gossypium hirsutum L. var. Stoneville 213	TX, USA	Leaves	O	F	12.4	35	23.7	Bull D.L.; Ivie G.W. Fate of diflubenzuron in cotton, soil, and rotational crops. Journal of Agricultural and Food Chemistry, 1978, 26(3), 515-520.
234	Diflubenzuron	N-(((4-chlorophenyl)amino)carbonyl)-2,6-difluorobenzamide	35367-38-5	Orange	Citrus x sinensis	FL, USA	Leaves	I	F	18	18	18	Nigg H.N.; Cannizzaro R.D.; Stamper J.H. Diflubenzuron surface residues in florida citrus. Bulletin of Environmental Contamination and Toxicology, 1986, 36(1), 833-838.
234	Diflubenzuron	N-(((4-chlorophenyl)amino)carbonyl)-2,6-difluorobenzamide	35367-38-5	Pepper	Capsicum annuum	Spain	Fruit	I	U	2.35	7.56	4.96	López‐López T.; Martínez‐Vidal J.L.; Gil‐García M.D.; Martínez‐Galera M.; Rodríguez‐Lallena J.A. Benzoylphenylurea residues in peppers and zucchinis grown in greenhouses: determination of decline times and pre‐harvest intervals by modelling. Pest Management Science, 2004, 60(2), 183-190.
234	Diflubenzuron	N-(((4-chlorophenyl)amino)carbonyl)-2,6-difluorobenzamide	35367-38-5	Pine	Pinus nigra laricio, P. pinaster, P. radiata & P. sylvestri	Spain	Leaves	I	F	21	21	21	Rodríguez E.; de Balugera Z.G.; Sampedro M.C.; Goicolea M.A.; Barrio R.J. Persistence of Diflubenzuron on Conifer Forest Foliage in a Mediterranean-Climate Ecosystem Following Aerial Application. International Journal of Environmental and Analytical Chemistry, 2003, 83(5), 433-442. Calculated.
234	Diflubenzuron	N-(((4-chlorophenyl)amino)carbonyl)-2,6-difluorobenzamide	35367-38-5	White spruce	Picea glauca	Canada	Leaves	O	F	9.3	12.8	11.05	Sundaram K.M.S. Initial deposits, persistence and degradation kinetics of the insect growth regulator, diflubenzuron, in some terrestrial matrices following simulated aerial application. Journal of Environmental Science and Health, 1996, 31(2), 135-163.
234	Diflubenzuron	N-(((4-chlorophenyl)amino)carbonyl)-2,6-difluorobenzamide	35367-38-5	White spruce	Picea glauca	Canada	Leaf litter	O	F	7.34	8.36	7.85	Sundaram K.M.S. Initial deposits, persistence and degradation kinetics of the insect growth regulator, diflubenzuron, in some terrestrial matrices following simulated aerial application. Journal of Environmental Science and Health, 1996, 31(2), 135-163.
234	Diflubenzuron	N-(((4-chlorophenyl)amino)carbonyl)-2,6-difluorobenzamide	35367-38-5	Zucchini	Cucurbita pepo var. Cylindrica	Spain	Fruit	I	U	2.78	2.78	2.78	López‐López T.; Martínez‐Vidal J.L.; Gil‐García M.D.; Martínez‐Galera M.; Rodríguez‐Lallena J.A. Benzoylphenylurea residues in peppers and zucchinis grown in greenhouses: determination of decline times and pre‐harvest intervals by modelling. Pest Management Science, 2004, 60(2), 183-190.
236	Dimefox	tetramethylphosphorodiamidic fluoride	115-26-4	Hop	Humulus lupulus var. Northern Brewer	Belgium	Leaves	I	F	12.38	15.4	13.89	Dejonckheere W.; Steurbaut W.; Dynoodt; R.; Kips R.H. Uptake and translocation of dimefox and schradan in hops. Pesticide Science, 1974, 5(5), 549-554. Calculated.
3023	Dimetachlone	1-(3,5-dichlorophenyl)-2,5-pyrrolidinedione	24096-53-5	Tobacco	Nicotiana tabacum	*	Leaves	I	F	3.21	8.77	6.1	Zhang Y.; He K.-J.; Liu W.; Xue Z.-J. Residue Analysis Methods and Degradation Regularity of Dimethachlon in Tobacco Leaves and Soils. Agrochemicals, 2009, 48(9), 677-679. Calculated.
244	Dimethoate	O,O-dimethyl S-(2-(methylamino)-2-oxoethyl) phosphorodithioate	60-51-5	Alfalfa	Medicago sativa	MA, USA	Leaves	*	F	1.4	1.4	1.4	Willis G.H.; McDowell L.L. Pesticide persistence on foliage. Reviews of Environmental Contamination and Toxicology, 1987, 100, 23-73.
244	Dimethoate	O,O-dimethyl S-(2-(methylamino)-2-oxoethyl) phosphorodithioate	60-51-5	Apple	Malus pumila Mill.	Canada	Leaves	I	F	2.6	7.2	4.9	Willis G.H.; McDowell L.L. Pesticide persistence on foliage. Reviews of Environmental Contamination and Toxicology, 1987, 100, 23-73.
244	Dimethoate	O,O-dimethyl S-(2-(methylamino)-2-oxoethyl) phosphorodithioate	60-51-5	Apricot	Prunus armeniaca L. cv. Boccuccia	Italy	Fruit	I	F	9	9	9	Cabras P.; Angioni A.; Garau V.L.; Minelli E.V.; Cabitza F.; Cubeddu M. Residues of Some Pesticides in Fresh and Dried Apricots. Journal of Agricultural and Food Chemistry, 1997, 45(8), 3221-3222.
244	Dimethoate	O,O-dimethyl S-(2-(methylamino)-2-oxoethyl) phosphorodithioate	60-51-5	Artichoke	Cynara scolymus L. cv. Masedu	Italy	Heart	O	F	3.4	3.4	3.4	Cabras P.; Angioni A.; Garau V.L.; Melis M.; Pirisi F.M.; Cabitza F.; Cubeddu M.; Minelli E. Pesticide residues in artichokes: Effect of different head shape. Journal of Environmental Science and Health, 1996, 31(6), 1189-1199. Calcuated.
244	Dimethoate	O,O-dimethyl S-(2-(methylamino)-2-oxoethyl) phosphorodithioate	60-51-5	Artichoke	Cynara scolymus L. cv. Spinoso sardo	Italy	Head	O	F	5	5	5	Cabras P.; Angioni A.; Garau V.L.; Melis M.; Pirisi F.M.; Cabitza F.; Cubeddu M.; Minelli E. Pesticide residues in artichokes: Effect of different head shape. Journal of Environmental Science and Health, 1996, 31(6), 1189-1199. Calcuated.
244	Dimethoate	O,O-dimethyl S-(2-(methylamino)-2-oxoethyl) phosphorodithioate	60-51-5	Beetroot	Beta vulgaris	CA, USA	Leaves	O	F	2.5	2.5	2.5	Vail P.V.; Stone M.W.; Maitlen J.C.; George D.A.; Butler L.I. Performance of insecticides against cabbage and green peach aphids on leafy vegetables and persistence of residues during cool weather. Journal of Economic Entomolology, 1967, 60, 537-541.
244	Dimethoate	O,O-dimethyl S-(2-(methylamino)-2-oxoethyl) phosphorodithioate	60-51-5	Bermuda grass (coastal)	Cynodon dactylon	Ga, USA	Leaves	I	F	3.1	3.1	3.1	Willis G.H.; McDowell L.L. Pesticide persistence on foliage. Reviews of Environmental Contamination and Toxicology, 1987, 100, 23-73.
244	Dimethoate	O,O-dimethyl S-(2-(methylamino)-2-oxoethyl) phosphorodithioate	60-51-5	Birdsfoot trefoil	Lotus corniculatus	MA, USA	Leaves	O	F	2.1	2.1	2.1	Willis G.H.; McDowell L.L. Pesticide persistence on foliage. Reviews of Environmental Contamination and Toxicology, 1987, 100, 23-73.
244	Dimethoate	O,O-dimethyl S-(2-(methylamino)-2-oxoethyl) phosphorodithioate	60-51-5	Broccoli	Brassica oleracea var. Italica	MD, USA	Leaves	I	F	3	3	3	Nelson K.A.; Menzer R.E.; Ditman L.P. Dimethoate residues in leafy crops. Journal of Economic Entomology, 1966, 59(2), 404-406.
244	Dimethoate	O,O-dimethyl S-(2-(methylamino)-2-oxoethyl) phosphorodithioate	60-51-5	Cabbage (spring)	Brassica oleracea capitata	China	Leaves	I	F	1.6	1.6	1.6	Zhang Z.-Y.; Liu X.-J.; Yu X.-Y.; Zhang C.-Z.; Hon X.-Y. Pesticide residues in the spring cabbage (Brassica oleracea L. var. capitata) grown in open field. Food Control, 2007, 18(6), 723-730.
244	Dimethoate	O,O-dimethyl S-(2-(methylamino)-2-oxoethyl) phosphorodithioate	60-51-5	Chinese cabbage	Brassica rapa subsp. pekinensis	China	Leaves	I	F	5.3	5.3	5.3	Zhang Z.Y.; Zhang C.Z.; Liu X.J.; Hong X.Y. Dynamics of pesticide residues in the autumn Chinese cabbage (Brassica chinensis L.) grown in open fields. Pest Management Science, 2006, 62(4), 350-355.
244	Dimethoate	O,O-dimethyl S-(2-(methylamino)-2-oxoethyl) phosphorodithioate	60-51-5	Cabbage	Brassica oleracea capitata	MD, USA	Leaves	I	F	1.7	1.7	1.7	Nelson K.A.; Menzer R.E.; Ditman L.P. Dimethoate residues in leafy crops. Journal of Economic Entomology, 1966, 59(2), 404-406.
244	Dimethoate	O,O-dimethyl S-(2-(methylamino)-2-oxoethyl) phosphorodithioate	60-51-5	Cabbage	Brassica oleracea capitata	*	Leaves	O	F	2.95	2.95	2.95	El-Sebae, A.H., 1989. Fate and undesirable effects of pesticides in Egypt. In: P. Bourdeau, J.A. Haines, W. Klein, a., Murti, C.R.K. (Eds.). Ecotoxicology and Climate. John Wiley and Sons, Chichester, pp. 359-371.
244	Dimethoate	O,O-dimethyl S-(2-(methylamino)-2-oxoethyl) phosphorodithioate	60-51-5	Cabbage	Brassica oleracea capitata	China	Head	I	F	2	2	2	Jiang H.-M.; Sun H.; Gu H.-H.; Fa, C.-M.; Zhuang B.-Q. Residues and Degradation Dynamics of Dimethoate 40% EC in Cabbage and Soils. Agrochemicals, 2007, 46(4), 245-255, 257.
244	Dimethoate	O,O-dimethyl S-(2-(methylamino)-2-oxoethyl) phosphorodithioate	60-51-5	Chard	Beta vulgaris subsp. Vulgaris	MD, USA	Leaves	I	F	2.6	2.6	2.6	Nelson K.A.; Menzer R.E.; Ditman L.P. Dimethoate residues in leafy crops. Journal of Economic Entomology, 1966, 59(2), 404-406.
244	Dimethoate	O,O-dimethyl S-(2-(methylamino)-2-oxoethyl) phosphorodithioate	60-51-5	Chinese cabbage	Brassica rapa subsp. pekinensis	China	Leaves	I	F	5.3	5.3	5.3	Zhang Z.-Y.; Zhang C.-Z.; Liu X.-J.; Hong X.-Y. Dynamics of pesticide residues in the autumn Chinese cabbage (Brassica chinensis L.) grown in open fields. Pest Management Science, 2006, 62(4), 350-355.
244	Dimethoate	O,O-dimethyl S-(2-(methylamino)-2-oxoethyl) phosphorodithioate	60-51-5	Citrus	Citrus spp.	Finland	Leaves	O	U	2.6	2.6	2.6	Liesivuori J.; Liukkonen S.; Pirhonen P. Reentry intervals after pesticide application in greenhouses. Scandinavian Journal of Work, Environment & Health, 1988, 14(suppl 1), 35-36.
244	Dimethoate	O,O-dimethyl S-(2-(methylamino)-2-oxoethyl) phosphorodithioate	60-51-5	Clover	Trifolium repens	MA, USA	Leaves	O	F	1.8	1.8	1.8	Willis G.H.; McDowell L.L. Pesticide persistence on foliage. Reviews of Environmental Contamination and Toxicology, 1987, 100, 23-73.
244	Dimethoate	O,O-dimethyl S-(2-(methylamino)-2-oxoethyl) phosphorodithioate	60-51-5	Collard	Brassica oleracea L.	USA	Leaves	I	F	2.6	2.6	2.6	Nelson K.A.; Menzer R.E.; Ditman L.P. Dimethoate residues in leafy crops. Journal of Economic Entomology, 1966, 59(2), 404-406.
244	Dimethoate	O,O-dimethyl S-(2-(methylamino)-2-oxoethyl) phosphorodithioate	60-51-5	Cotton	Gossypium hirsutum L.	Egypy	Leaves	I	F	3.3	3.3	3.3	Willis G.H.; McDowell L.L. Pesticide persistence on foliage. Reviews of Environmental Contamination and Toxicology, 1987, 100, 23-73.
244	Dimethoate	O,O-dimethyl S-(2-(methylamino)-2-oxoethyl) phosphorodithioate	60-51-5	Cotton	Gossypium hirsutum L. var. Lankart 55	USA	Leaves	I	F	11.18	11.18	11.18	Dauterman W.C.; Viado G.B.; Casida J.E.; O'Brien, R.D. Insecticide Residues, Persistence of Dimethoate and Metabolites Following Foliar Application to Plants. Journal of Agricultural and Food Chemistry, 1960, 8(2), 115-119. Calculated.
244	Dimethoate	O,O-dimethyl S-(2-(methylamino)-2-oxoethyl) phosphorodithioate	60-51-5	Cotton	Gossypium hirsutum L.	Egypt	Leaves	I	F	3.3	3.3	3.3	Belal M.H.; Gomaa E.A.A. Determination of dimethoate residue in some vegetables and cotton plants. Bulletin of Environmental Contamination and Toxicology, 1979, 22(1), 726-730.
244	Dimethoate	O,O-dimethyl S-(2-(methylamino)-2-oxoethyl) phosphorodithioate	60-51-5	Cucumber	Cucumis sativus L.	Egypt	Fruit	I	F	3.8	3.8	3.8	Belal M.H.; Gomaa E.A.A. Determination of dimethoate residue in some vegetables and cotton plants. Bulletin of Environmental Contamination and Toxicology, 1979, 22(1), 726-730.
244	Dimethoate	O,O-dimethyl S-(2-(methylamino)-2-oxoethyl) phosphorodithioate	60-51-5	Cucumber	Cucumis sativus L.	*	Fruit	O	U	2.7	2.7	2.7	Goedicke H.J. Rückstandstoxicologische Bewertungen des Einsetzes von Pflanzenschutzmittelen und Mitteln zur Steurung Biologische Prozesse in Gemüse unter Glas und Plasten [Residue based toxicological considerations for the use of pesticides in greenhouse crops] Die Nahrung, 1988, 32, 565-570.
244	Dimethoate	O,O-dimethyl S-(2-(methylamino)-2-oxoethyl) phosphorodithioate	60-51-5	Cucumber	Cucumis sativus L.	Egypt	Leaves	O	F	3.8	3.8	3.8	Belal M.H.; Gomaa E.A.A. Determination of dimethoate residue in some vegetables and cotton plants. Bulletin of Environmental Contamination and Toxicology, 1979, 22(1), 726-730.
244	Dimethoate	O,O-dimethyl S-(2-(methylamino)-2-oxoethyl) phosphorodithioate	60-51-5	Green bean	Phaseolus vulgaris	USA	Leaves	I	F	2.6	4.3	3.45	Willis G.H.; McDowell L.L. Pesticide persistence on foliage. Reviews of Environmental Contamination and Toxicology, 1987, 100, 23-73.
244	Dimethoate	O,O-dimethyl S-(2-(methylamino)-2-oxoethyl) phosphorodithioate	60-51-5	Green bean	Phaseolus vulgaris L. var. Ohnegleichen	Switzerland	Leaves	O	U	3.1	3.1	3.1	Sauer H.H. Fate of formothion on bean plants in the greenhouse. Journal of Agricultural and Food Chemistry, 1972, 20(3), 578-583.
244	Dimethoate	O,O-dimethyl S-(2-(methylamino)-2-oxoethyl) phosphorodithioate	60-51-5	Green bean	Phaseolus vulgaris L.	Egypt	Fruit	O	F	4.3	4.3	4.3	Belal M.H.; Gomaa E.A.A. Determination of dimethoate residue in some vegetables and cotton plants. Bulletin of Environmental Contamination and Toxicology, 1979, 22(1), 726-730.
244	Dimethoate	O,O-dimethyl S-(2-(methylamino)-2-oxoethyl) phosphorodithioate	60-51-5	Green bean	Phaseolus vulgaris L. var. Ohnegleichen	Egypt	Leaves	O	F	4.3	4.3	4.3	Belal M.H.; Gomaa E.A.A. Determination of dimethoate residue in some vegetables and cotton plants. Bulletin of Environmental Contamination and Toxicology, 1979, 22(1), 726-730.
244	Dimethoate	O,O-dimethyl S-(2-(methylamino)-2-oxoethyl) phosphorodithioate	60-51-5	Guava	Psidium guajava	Pakistan	Fruit	O	F	2.8	7.52	5.24	Khan B.A. Studies on the Residues of Commonly Used Insecticides on Fruits and Vegetables Grown in NWFP-Pakistan. Department of Agricultural Chemistry. NWFP Agricultural University Peshawar, Pakistan, 2005, p. 193.
244	Dimethoate	O,O-dimethyl S-(2-(methylamino)-2-oxoethyl) phosphorodithioate	60-51-5	Guava	Psidium guajava L.	India	Fruit	I	F	6.72	8.15	7.44	Devi M.; Duhan A.; Kumari B.; Yadav G.S. Determination of dimethoate, lambda-cyhalothrin and malathion residues in guava fruits using GCMS-tandem mass spectrometry. The Horticultural Society of India (Regd.), 2016, 73(2), 197-201.
244	Dimethoate	O,O-dimethyl S-(2-(methylamino)-2-oxoethyl) phosphorodithioate	60-51-5	Lemon	Citrus x limon	CA, USA	Leaves	O	F	2.2	2.2	2.2	Willis G.H.; McDowell L.L. Pesticide persistence on foliage. Reviews of Environmental Contamination and Toxicology, 1987, 100, 23-73.
244	Dimethoate	O,O-dimethyl S-(2-(methylamino)-2-oxoethyl) phosphorodithioate	60-51-5	Lemon	Citrus x limon	*	Leaves	I	F	2.6	2.6	2.6	Iwata Y.; Duesch M.E.; Carman G.E.; Gunther F.A. Worker environment research: residues from carbaryl, chlorobenzilate, dimethoate, and trichlorfon applied to citrus trees. Journal of Agricultural and Food Chemistry, 1979, 27(6), 1141-1145.
244	Dimethoate	O,O-dimethyl S-(2-(methylamino)-2-oxoethyl) phosphorodithioate	60-51-5	Lettuce	Lactuca sativa	CA, USA	Head	O	F	2.8	2.8	2.8	Vail P.V.; Stone M.W.; Maitlen J.C.; George D.A.; Butler L.I. Performance of insecticides against cabbage and green peach aphids on leafy vegetables and persistence of residues during cool weather. Journal of Economic Entomology, 1967, 60(2), 537-541.
244	Dimethoate	O,O-dimethyl S-(2-(methylamino)-2-oxoethyl) phosphorodithioate	60-51-5	Lima bean	Phaseolus lunatus	MD, USA	Leaves	I	F	2.2	2.2	2.2	Willis G.H.; McDowell L.L. Pesticide persistence on foliage. Reviews of Environmental Contamination and Toxicology, 1987, 100, 23-73.
244	Dimethoate	O,O-dimethyl S-(2-(methylamino)-2-oxoethyl) phosphorodithioate	60-51-5	Maize	Zea mays L. var. 1512	USA	Leaves	O	F	2.51	2.51	2.51	Dauterman W.C.; Viado G.B.; Casida J.E.; O'Brien R.D. Insecticide Residues, Persistence of Dimethoate and Metabolites Following Foliar Application to Plants. Journal of Agricultural and Food Chemistry, 1960, 8(2), 115-119.
244	Dimethoate	O,O-dimethyl S-(2-(methylamino)-2-oxoethyl) phosphorodithioate	60-51-5	Maize	Zea mays L.	GA, USA	Leaves	I	F	2.7	2.7	2.7	Willis G.H.; McDowell L.L. Pesticide persistence on foliage. Reviews of Environmental Contamination and Toxicology, 1987, 100, 23-73.
244	Dimethoate	O,O-dimethyl S-(2-(methylamino)-2-oxoethyl) phosphorodithioate	60-51-5	Mango	Mangifera indica L.	India	Fruit	I	F	2.6	2.6	2.6	Regupathy A.; Habeebullah B.; Kuttalam S.; Balasubramanian M.; Manavalan R.S.A. Dissipation of dimethoate, methyl demeton and fenthion in mango fruits. International Journal of Entomology, India, 1982, 1(1), 7-9
244	Dimethoate	O,O-dimethyl S-(2-(methylamino)-2-oxoethyl) phosphorodithioate	60-51-5	Mango	Mangifera indica	India	Fruit	O	F	3.1	3.1	3.1	Awasthi M.D.; Ahuja A.K. Evaluation of the persistence and dissipation pattern of dimethoate and fenthion residues on mango fruits for their safe waiting periods. Indian Journal of Horticulture, 1991, 48(3), 243-246.
244	Dimethoate	O,O-dimethyl S-(2-(methylamino)-2-oxoethyl) phosphorodithioate	60-51-5	Okra	Abelmoschus esculentus L.	India	Fruit	I	F	5.21	5.21	5.21	Waghulde P.N.; Khatik M.K.; Patil V.T.; Patil P.R. Persistence and Dissipation of Pesticides in Chilly and Okra at North Maharashtra Region. Pesticide Research Journal, 2011, 23(1), 23-26.
244	Dimethoate	O,O-dimethyl S-(2-(methylamino)-2-oxoethyl) phosphorodithioate	60-51-5	Olive	Olea europaea cv. Yacouti	Italy	Fruit	I	F	4.3	4.3	4.3	Cabras P.; Angioni A.; Garau V.L.; Melis M.; Pirisi F.M.; Karim M.; Minelli E.V. Persistence of Insecticide Residues in Olives and Olive Oil. Journal of Agricultural and Food Chemistry, 1997, 45(6), 2244-2247.
244	Dimethoate	O,O-dimethyl S-(2-(methylamino)-2-oxoethyl) phosphorodithioate	60-51-5	Olive	Olea europaea	Portugal	Fruit	I	F	6.13	6.13	6.13	Ferreira J.R.; Taínha A.M. Organophosphorus insecticide residues in olives and olive oil. Pesticide Science, 1983, 14(2), 167-172. Calculated.
244	Dimethoate	O,O-dimethyl S-(2-(methylamino)-2-oxoethyl) phosphorodithioate	60-51-5	Onion	Allium cepa L.	India	Bulb	I	F	2	2	2	Srinivas S.P.; Banerjee K.; Jadhav M.R.; Ghaste M.S.; Lawande K.E. Bioefficacy, dissipation kinetics and safety evaluation of selected insecticides in Allium cepa L. Journal of Environmental Science and Health, 2012, 47(7), 700-709.
244	Dimethoate	O,O-dimethyl S-(2-(methylamino)-2-oxoethyl) phosphorodithioate	60-51-5	Orange	Citrus x sinensis	Greece	Leaves	O	F	7	7	7	Hadjidemetriou D.G.; Iwata Y.; Gunther F.A. Analysis and dissipation of dislodgable residues of acephate, dimethoate and formetanate hydrochloride on citrus foliage. Pesticide Science, 1985, 16(3), 302-310.
244	Dimethoate	O,O-dimethyl S-(2-(methylamino)-2-oxoethyl) phosphorodithioate	60-51-5	Orange	Citrus x sinensis	USA	Leaves	O	U	2.6	2.6	2.6	Liesivuori J.; Liukkonen S.; Pirhonen P. Reentry intervals after pesticide application in greenhouses. Scandinavian Journal of Work, Environment & Health, 1988, 14(suppl 1), 35-36.
244	Dimethoate	O,O-dimethyl S-(2-(methylamino)-2-oxoethyl) phosphorodithioate	60-51-5	Pea	Pisum sativum L. var. Perfection 15	USA	Leaves	O	F	6.24	6.24	6.24	Dauterman W.C.; Viado G.B.; Casida J.E.; O'Brien R.D. Insecticide Residues, Persistence of Dimethoate and Metabolites Following Foliar Application to Plants. Journal of Agricultural and Food Chemistry, 1960, 8(2), 115-119. Calcuated.
244	Dimethoate	O,O-dimethyl S-(2-(methylamino)-2-oxoethyl) phosphorodithioate	60-51-5	Pea	Pisum sativum L. var. Perfection 15	Kenya	Leaves	O	U	13	13	13	Getenga Z.M.; Jondiko J.I.O.; Wandiga S.O.; Beck E. The dissipation of malathion and dimethoate from the pea plants (Pisum sativum) under controlled conditions. Toxicological and Environmental Chemistry, 2000, 77(3-4), 219-228.
244	Dimethoate	O,O-dimethyl S-(2-(methylamino)-2-oxoethyl) phosphorodithioate	60-51-5	Pea	Pisum sativum L. var. Perfection 15	Kenya	Leaves	I	U	29	29	29	Getenga Z.M.; Jondiko J.I.O.; Wandiga S.O.; Beck E. The dissipation of malathion and dimethoate from the pea plants (Pisum sativum) under controlled conditions. Toxicological and Environmental Chemistry, 2000, 77(3-4), 219-228.
244	Dimethoate	O,O-dimethyl S-(2-(methylamino)-2-oxoethyl) phosphorodithioate	60-51-5	Peach	Prunus persica	Brazil	Fruit	I	F	12	12	12	Minelli E.V.; Angioni A.; Cabras P.; Garau V.L.; Melis M.; Pirisi F.M.; Cabitza F.; Cubeddu M. Persistence of some pesticides in peach fruit. Italian Journal of Food Science, 1996, 8(1), 57-62.
244	Dimethoate	O,O-dimethyl S-(2-(methylamino)-2-oxoethyl) phosphorodithioate	60-51-5	Pepper (chilli)	Capsicum annuum L.	India	Fruit	I	F	1.94	1.94	1.94	Varghese T.S.; Mathew T.B.; George T.; Beevi S.N.; Xavier G. Dissipation study of dimethoate, ethion and oxydemeton methyl in chilli. Pesticide Research Journal, 2011, 23(1), 68-73.
244	Dimethoate	O,O-dimethyl S-(2-(methylamino)-2-oxoethyl) phosphorodithioate	60-51-5	Pepper (chilli)	Capsicum annuum L.	India	Fruit	O	F	4.2	4.4	4.3	Chinniah C.; Kuttalam S.; Santharama G.; Rabindra R.J. Dissipation of Dimethoate Residues on Chillies. Pesticide Research Journal, 2000, 12(2), 245-247.
244	Dimethoate	O,O-dimethyl S-(2-(methylamino)-2-oxoethyl) phosphorodithioate	60-51-5	Pepper (chilli)	Capsicum annuum L.	India	Fruit	I	F	4.7	4.7	4.7	Waghulde P.N.; Khatik M.K.; Patil V.T.; Patil P.R. Persistence and Dissipation of Pesticides in Chilly and Okra at North Maharashtra Region. Pesticide Research Journal, 2011, 23(1), 23-26.
244	Dimethoate	O,O-dimethyl S-(2-(methylamino)-2-oxoethyl) phosphorodithioate	60-51-5	Pomegranate	Punica granatum L. cv. Bhagwa	India	Fruit	I	F	5.75	7.5	6.31	Utture S.C.; Banerjee K.; Kolekar S.S.; Dasgupta S.; Oulkar D.P.; Patil S. H.; ... Anuse M.A. Food safety evaluation of buprofezin, dimethoate and imidacloprid residues in pomegranate. Food chemistry, 2012, 131(3), 787-795.
244	Dimethoate	O,O-dimethyl S-(2-(methylamino)-2-oxoethyl) phosphorodithioate	60-51-5	Potato	Solanum tuberosum L. var. Irish cobbler	USA	Leaves	O	F	6.8	6.8	6.8	Dauterman W.C.; Viado G.B.; Casida J.E.; O'Brien R.D. Insecticide Residues, Persistence of Dimethoate and Metabolites Following Foliar Application to Plants. Journal of Agricultural and Food Chemistry, 1960, 8(2), 115-119. Calcuated.
244	Dimethoate	O,O-dimethyl S-(2-(methylamino)-2-oxoethyl) phosphorodithioate	60-51-5	Rose	Rosa spp.	USA	Leaves	I	U	0.88	0.88	0.88	Liesivuori J.; Liukkonen S.; Pirhonen P. Reentry intervals after pesticide application in greenhouses. Scandinavian Journal of Work, Environment & Health , 1988, 14(suppl 1), 35-36.
244	Dimethoate	O,O-dimethyl S-(2-(methylamino)-2-oxoethyl) phosphorodithioate	60-51-5	Rose	Rosa spp.	*	Leaves	O	U	0.88	0.88	0.88	Liesivuori J; Liukkonen S.; Pirhonen P. Reentry intervals after pesticide application in greenhouses. Scandinavian Journal of Work, Environment & Health, 1988, 14(suppl 1), 35-36.
244	Dimethoate	O,O-dimethyl S-(2-(methylamino)-2-oxoethyl) phosphorodithioate	60-51-5	Snowpea	Pisum sativum Saccharatum Cv. Ho Lohn Dow	Canada	Fruit	I	F	2.4	2.4	2.4	Ripley B.D.; Ritcey G.M.; Harris C.R.; Denommé M.A.; Lissemore L.I. Comparative Persistence of Pesticides on Selected Cultivars of Speciality Vegetables. Journal of Agricultural and Food Chemistry, 2003, 51(5), 1328-1335.
244	Dimethoate	O,O-dimethyl S-(2-(methylamino)-2-oxoethyl) phosphorodithioate	60-51-5	Sorghum	Sorghum bicolor	TX, USA	Leaves	I	F	4	4	4	Willis G.H.; McDowell L.L. Pesticide persistence on foliage. Reviews of Environmental Contamination and Toxicology, 1987, 100, 23-73.
244	Dimethoate	O,O-dimethyl S-(2-(methylamino)-2-oxoethyl) phosphorodithioate	60-51-5	Soybean	Glycine max	GA, USA	Leaves	I	F	0.9	0.9	0.9	Willis G.H.; McDowell L.L. Pesticide persistence on foliage. Reviews of Environmental Contamination and Toxicology, 1987, 100, 23-73.
244	Dimethoate	O,O-dimethyl S-(2-(methylamino)-2-oxoethyl) phosphorodithioate	60-51-5	Soybean	Glycine max	MD, USA	Leaves	I	F	1.2	1.2	1.2	Willis G.H.; McDowell L.L. Pesticide persistence on foliage. Reviews of Environmental Contamination and Toxicology, 1987, 100, 23-73.
244	Dimethoate	O,O-dimethyl S-(2-(methylamino)-2-oxoethyl) phosphorodithioate	60-51-5	Soybean	Glycine max var. Jackson	USA	Leaves	O	F	0.9	0.9	0.9	Beck E.W.; Dawsey L.H.; Woodham D.W.; Leuck D.B. Dimethoate residues on soybean, corn, and grass forage. Journal of Economic Entomology, 1966, 59(1), 78-82.
244	Dimethoate	O,O-dimethyl S-(2-(methylamino)-2-oxoethyl) phosphorodithioate	60-51-5	Sugar beet	Beta vulgaris subsp. vulgaris convar. vulgaris var. Altissima	CA, USA	Leaves	*	F	2.5	2.5	2.5	Willis G.H.; McDowell L.L. Pesticide persistence on foliage. Reviews of Environmental Contamination and Toxicology, 1987, 100, 23-73.
244	Dimethoate	O,O-dimethyl S-(2-(methylamino)-2-oxoethyl) phosphorodithioate	60-51-5	Tea	Camellia sinensis L.	China	Leaves	O	F	0.95	0.95	0.95	Zongmao C.; Haibin W. Degradation of Pesticides on Plant Surfaces and its Prediction - A Case Study on Tea Plant. Environmental Monitoring and Assessment, 1997, 44(1-3), 303-313.
244	Dimethoate	O,O-dimethyl S-(2-(methylamino)-2-oxoethyl) phosphorodithioate	60-51-5	Tea	Camellia sinensis L. O. Kuntze	India	Leaves	I	F	3.38	3.38	3.38	Baruah A.A.L.H.; Devee A.; Choudhury K. Dissipation Studies of Bifenthrin and Dimethoate in Tea [Camellia sinensis (L.) O. Kuntze]. Pesticide Research Journal, 2010, 22(2), 195-197.
244	Dimethoate	O,O-dimethyl S-(2-(methylamino)-2-oxoethyl) phosphorodithioate	60-51-5	Tomato	Lycopersicon esculentum Mill.	*	Fruit	O	F	2.4	2.4	2.4	El-Sebae A.H. Fate and undesirable effects of pesticides in Egypt. In: P. Bourdeau, J.A. Haines, W. Klein, a., Murti, C.R.K. (Eds.). Ecotoxicology and Climate. 1989, John Wiley and Sons, Chichester, pp. 359-371.
244	Dimethoate	O,O-dimethyl S-(2-(methylamino)-2-oxoethyl) phosphorodithioate	60-51-5	Tomato	Lycopersicon esculentum Mill.	*	Leaves	O	F	3.4	3.4	3.4	El-Sebae A.H. Fate and undesirable effects of pesticides in Egypt. In: P. Bourdeau, J.A. Haines, W. Klein, a., Murti, C.R.K. (Eds.). Ecotoxicology and Climate. 1989, John Wiley and Sons, Chichester, pp. 359-371.
244	Dimethoate	O,O-dimethyl S-(2-(methylamino)-2-oxoethyl) phosphorodithioate	60-51-5	Tomato	Lycopersicon esculentum Mill.	Egypt	Leaves	I	F	6	6	6	Belal M.H.; Gomaa E.A.A. Determination of dimethoate residue in some vegetables and cotton plants. Bulletin of Environmental Contamination and Toxicology, 1979, 22(1), 726-730.
244	Dimethoate	O,O-dimethyl S-(2-(methylamino)-2-oxoethyl) phosphorodithioate	60-51-5	Turnip	Brassica rapa subsp. Rapa	USA	Leaves	I	F	3.1	3.2	3.15	Willis G.H.; McDowell L.L. Pesticide persistence on foliage. Reviews of Environmental Contamination and Toxicology, 1987, 100, 23-73.
244	Dimethoate	O,O-dimethyl S-(2-(methylamino)-2-oxoethyl) phosphorodithioate	60-51-5	Wheat	Triticum aestivum L.	Canda	Leaves	I	F	2.5	2.5	2.5	Willis G.H.; McDowell L.L. Pesticide persistence on foliage. Reviews of Environmental Contamination and Toxicology, 1987, 100, 23-73.
245	Dimethomorph	4-(3-(4-chlorophenyl)-3-(3,4-dimethoxyphenyl)-1-oxo-2-propenyl)morpholine	110488-70-5	Grape	Vitis vinifera	China	Fruit	I	F	12.4	17.1	14.75	Fan D.-S. Dimethomorph Residues and Dissipation in Grape. Agrochemicals, 2009, 48(9), 675-676,682.
245	Dimethomorph	4-(3-(4-chlorophenyl)-3-(3,4-dimethoxyphenyl)-1-oxo-2-propenyl)morpholine	110488-70-5	Litchi	Litchi chinensis	China	Skin	I	F	3.5	3.5	3.5	Lu Z.-X.; Lin M.-Z.; Huang H.-Y.; Li X.-S. Residual Dynamics of Acrobat in Lichee and Soil. Modern Agrochemicals, 2006, 5(3), 7-12.
245	Dimethomorph	4-(3-(4-chlorophenyl)-3-(3,4-dimethoxyphenyl)-1-oxo-2-propenyl)morpholine	110488-70-5	Pepper	Capsicum annuum L.	China	Fruit	I	F	1.7	3.8	2.75	Liang H.; Li L.; Li W.; Wu Y.; Zhou Z.; Liu F. Dissipation and residue of dimethomorph in pepper and soil under field conditions. Ecotoxicology and Environmental Safety, 2011, 74(5), 1331-1335.
245	Dimethomorph	4-(3-(4-chlorophenyl)-3-(3,4-dimethoxyphenyl)-1-oxo-2-propenyl)morpholine	110488-70-5	Pepper (chilli)	Capsicum annuum L. var. Chilgok-gun	Republic of Korea	Fruit	I	U	2.5	2.6	2.55	Kwon C.H.; Lee Y.D. Distribution and dissipation of deltamethrin, dimethomorph, imidacloprid, mepanipyrim, and metalaxyl applied to chili peppers. Journal of the Korean Society for Applied Biological Chemistry, 2015, 58(6), 821-829
245	Dimethomorph	4-(3-(4-chlorophenyl)-3-(3,4-dimethoxyphenyl)-1-oxo-2-propenyl)morpholine	110488-70-5	Spring onion	Allium fistulosum	China	Whole plant	I	F	3.5	3.5	3.5	Cui S.-H.; Wang K.-Y.; Qian J.-L.; Zhang L.-D.; Liu J.-F.; Wu G.-M. Residue Dynamics of Dimethomorph in Scallion. Agrochemicals, 2010, 49(1), 47-49,52.
247	Diniconazole	(betaE)-beta-[(2,4-dichlorophenyl)methylene]-alpha-(1,1-dimethylethyl)-1H-1,2,4-triazole-1-ethanol	83657-24-3	Broad bean	Vicia faba L. cv. Nobaria 1	Egypt	Pods	I	F	2.46	2.46	2.46	Din S.E.; Azab M.M.; El-Zaher T.R.A.; Mahmoud H.A.; Sleem F.M. Persistence of diniconazole and etoxazole in broad bean pods, peel, seeds and planted soil. Journal of Plant Protection and Pathology, 2015, 6(5), 859 - 870
247	Diniconazole	(betaE)-beta-[(2,4-dichlorophenyl)methylene]-alpha-(1,1-dimethylethyl)-1H-1,2,4-triazole-1-ethanol	83657-24-3	Broad bean	Vicia faba L. cv. Nobaria 1	Egypt	Peel	I	F	2.29	2.29	2.29	Din S.E.; Azab M.M.; El-Zaher T.R.A.; Mahmoud H.A.; Sleem F.M. Persistence of diniconazole and etoxazole in broad bean pods, peel, seeds and planted soil. Journal of Plant Protection and Pathology, 2015, 6(5), 859 - 870
247	Diniconazole	(betaE)-beta-[(2,4-dichlorophenyl)methylene]-alpha-(1,1-dimethylethyl)-1H-1,2,4-triazole-1-ethanol	83657-24-3	Broad bean	Vicia faba L. cv. Nobaria 1	Egypt	Seed	I	F	5.25	5.25	5.25	Din S.E.; Azab M.M.; El-Zaher T.R.A.; Mahmoud H.A.; Sleem F.M. Persistence of diniconazole and etoxazole in broad bean pods, peel, seeds and planted soil. Journal of Plant Protection and Pathology, 2015, 6(5), 859 - 870
247	Diniconazole	(betaE)-beta-[(2,4-dichlorophenyl)methylene]-alpha-(1,1-dimethylethyl)-1H-1,2,4-triazole-1-ethanol	83657-24-3	Cucumber	Cucumis sativus L.	Egypt	Fruit	I	U	3.1	3.1	3.1	Mahmoud H.A.; Eissa F.I. Diniconazole residues in field-sprayed and household processed cucumber and pepper fruits. Annals of Agricultural Science (Cairo), 2007, 52(1), 253-260.
247	Diniconazole	(betaE)-beta-[(2,4-dichlorophenyl)methylene]-alpha-(1,1-dimethylethyl)-1H-1,2,4-triazole-1-ethanol	83657-24-3	Grape	Vitis vinifera	China	Fruit	I	F	5.42	5.42	5.42	Wang W.; Xu Y.; Huang Y.; Sun Y.; Liu L.; Sun Y. Residue Dynamics of Diniconazol in Grapes and Soil. Modern Scientific Instruments, 2007, 1, 58-60.
247	Diniconazole	(betaE)-beta-[(2,4-dichlorophenyl)methylene]-alpha-(1,1-dimethylethyl)-1H-1,2,4-triazole-1-ethanol	83657-24-3	Grape	Vitis vinifera	Egypt	Fruit	I	F	6	6	6	Lotfy H.M.; Abdel-Aleem A.A.A.; Monir H.H. Determination of diniconazole fungicide residues in grapes and zucchini by capillary gas chromatography. Analytical Chemistry: An Indian Journal, 2012, 11(4), 131-136.
247	Diniconazole	(betaE)-beta-[(2,4-dichlorophenyl)methylene]-alpha-(1,1-dimethylethyl)-1H-1,2,4-triazole-1-ethanol	83657-24-3	Green bean	Phaseolus vulgaris L.	Egypt	Fruit	I	F	3.01	3.01	3.01	Amer M.M.; Shehata M.A.; Lotfy H.M.; Monir H.H. Determination of tetraconazole and diniconazole fungicide residues in tomatoes and green beans by capillary gas chromatography, Yakugaku Zasshi, 2007, 127(6), 993-999.
247	Diniconazole	(betaE)-beta-[(2,4-dichlorophenyl)methylene]-alpha-(1,1-dimethylethyl)-1H-1,2,4-triazole-1-ethanol	83657-24-3	Pear	Pyrus communis	*	Fruit	I	F	5.3	11.3	8.3	Feng X. A Study on the Dissipation and Residue of Diniconazole in Pears and Soils. Pesticides, 1997, (2), 23-25.
247	Diniconazole	(betaE)-beta-[(2,4-dichlorophenyl)methylene]-alpha-(1,1-dimethylethyl)-1H-1,2,4-triazole-1-ethanol	83657-24-3	Pepper	Capsicum annuum L.	Egypt	Fruit	I	U	0.9	0.9	0.9	Mahmoud H.A.; Eissa, F. I. Diniconazole residues in field-sprayed and household processed cucumber and pepper fruits. Annals of Agricultural Science (Cairo), 2007, 52(1), 253-260.
247	Diniconazole	(betaE)-beta-[(2,4-dichlorophenyl)methylene]-alpha-(1,1-dimethylethyl)-1H-1,2,4-triazole-1-ethanol	83657-24-3	Tomato	Lycopersicon esculentum Mill.	Egypt	Fruit	I	F	2.66	2.66	2.66	Amer M.M.; Shehata M.A.; Lotfy H.M.; Monir H.H. Determination of tetraconazole and diniconazole fungicide residues in tomatoes and green beans by capillary gas chromatography, Yakugaku Zasshi, 2007, 127(6), 993-999.
247	Diniconazole	(betaE)-beta-[(2,4-dichlorophenyl)methylene]-alpha-(1,1-dimethylethyl)-1H-1,2,4-triazole-1-ethanol	83657-24-3	Zucchini	Cucurbita pepo var. Cylindrica	Egypt	Fruit	I	F	2	2	2	Lotfy H.M.; Abdel-Aleem A.A.A.; Monir H.H. Determination of diniconazole fungicide residues in grapes and zucchini by capillary gas chromatography. Analytical Chemistry: An Indian Journal, 2012, 11(4), 131-136.
249	Dinobuton	1-methylethyl 2-(1-methylpropyl)-4,6-dinitrophenyl carbonate	973-21-7	Green bean	Phaseolus vulgaris L.	*	Leaves	I	U	2.8	2.8	2.8	Bandal S.K.; Casida J.E. Metabolism and photoalteration of 2-sec-butyl-4,6-dinitrophenol (DNBP herbicide) and its isopropyl carbonate derivative (dinobuton acaricide). Journal of Agricultural and Food Chemistry, 1972, 20, 1235–1245.
250	Dinocap	(RS)-2,6-dinitro-4-octylphenyl crotonates and (RS)-2,4-dinitro-6-octylphenyl crotonates	131-72-6	Cucumber	Cucumis sativus L. cv. Harliton Seedless	Canada	Fruit	I	U	3.54	8.06	5.8	Ripley B.D.; Frank R.; Jarvis W.R.; Fisher J.C. Residues of Ethylenebisdithiocarbamates (EBDC) and Dinocap in Greenhouse Cucumber Fruits. Canadian Journal of Plant Science, 1985, 65(1), 229-232.
250	Dinocap	(RS)-2,6-dinitro-4-octylphenyl crotonates and (RS)-2,4-dinitro-6-octylphenyl crotonates	131-72-6	Grape	Vitis vinifera L. var. Concord	Canada	Fruit	I	U	13.3	15.4	14.4	Ripley B.D.; Cox D.F.; Wiebe J.; Frank R. Residues of Dikar and ethylenethiourea in treated grapes and commercial grape products. Journal of Agricultural and Food Chemistry, 1978, 26(1), 134-136.
1195	Dinotefuran	N-methyl-N'-nitro-N''-((tetrahydro-3-furanyl)methyl)guanidine	165252-70-0	Pepper	Capsicum annuum L.	Republic of Korea	Fruit	I	U	8.84	9.67	9.26	Hem L.; Shin E.-H.; Khay S.; Park J.-H.; Park J.-Y.; Shim J.-H. Dissipation Patterns of Acrinathrin, Dinotefuran, Fenhexamid, Methoxyfenozide and Tetradifon in Pepper Grown under Greenhouse Conditions. Chonnam National University, South Korea, 2008
1195	Dinotefuran	N-methyl-N'-nitro-N''-((tetrahydro-3-furanyl)methyl)guanidine	165252-70-0	Rice	Oryza sativa	China	Whole plant	I	F	0.5	2.3	1.27	Li R.; Liu T.; Cui S.; Zhang S.; Yu J.; Song G. Residue behaviors and dietary risk assessment of dinotefuran and its metabolites in Oryza sativa by a new HPLC–MS/MS method. Food Chemistry, 2017, 235, 188-193.
1195	Dinotefuran	N-methyl-N'-nitro-N''-((tetrahydro-3-furanyl)methyl)guanidine	165252-70-0	Spinach	Spinacia oleracea L. var. Bloomsdale	CA, USA	Leaves	I	F	10	10	10	Ford K.A.; Casida J.E. Comparative Metabolism and Pharmacokinetics of Seven Neonicotinoid Insecticides in Spinach. Journal of Agricultural and Food Chemistry, 2008, 56(21), 10168-10175.
3024	Dioctyldiethylenetriamine	N1-octyl-N2-(2-(octylamino)ethyl)-1,2-ethanediamine	57413-95-3	Rice	Oryza sativa	China	Whole plant	I	F	6.2	12	9.1	Li X.; Jiang Y.; Shan W.; Pan C. Dissipation and Residues Detection of Dioctyldiethylenetriamine Aetate in Rice Plant and Environment by QuEChERS Method and Liquid Chromatography/Electrospray Tandem Mass Spectrometry. Bulletin of Environmental Contamination and Toxicology, 2010, 84(5), 596-601.
1595	Dioxabenzophos	2-methoxy-4H-1,3,2-benzodioxaphosphorin 2-sulfide	3811-49-2	Green bean	Phaseolus vulgaris L.	Japan	Leaves	O	F	1	1	1	Willis G.H.; McDowell L.L. Pesticide persistence on foliage. Reviews of Environmental Contamination and Toxicology, 1987, 100, 23-73.
1595	Dioxabenzophos	2-methoxy-4H-1,3,2-benzodioxaphosphorin 2-sulfide	3811-49-2	Rice	Oryza sativa	Japan	Leaves	O	F	1	1	1	Willis G.H.; McDowell L.L. Pesticide persistence on foliage. Reviews of Environmental Contamination and Toxicology, 1987, 100, 23-73.
1100	Dioxathion	S,S'-1,4-dioxane-2,3-diyl bis(O,O-diethyl phosphorodithioate)	78-34-2	Orange	Citrus x sinensis	Florida, USA	Leaves	O	F	3.14	9.12	6.13	Thompson N.P.; Brooks R.F. Disappearance of dislodgable residues of five organophosphate pesticides on citrus leaves and fruit during dry and wet weather in Florida. Archives of Environmental Contamination and Toxicology, 1977, 5(1), 55-61. Calculated.
258	Dithianon	5,10-dihydro-5,10-dioxonaphtho(2,3-b)-1,4-dithiin-2,3-dicarbonitrile	3347-22-6	Apple	Malus pumila Mill. cv. Gold delicions	Italy	Fruit	O	F	21.4	21.4	21.4	Passarella,I.; Elia I.; Guarino B.; Bourlot G.; Nègre M. Evaluation of the field dissipation of fungicides and insecticides used on fruit bearing trees in northern Italy. Journal of Environmental Science and Health, 2009, 44(2), 137-143.
258	Dithianon	5,10-dihydro-5,10-dioxonaphtho(2,3-b)-1,4-dithiin-2,3-dicarbonitrile	3347-22-6	Nectarine	Prunus persica var. nucipersica	Italy	Fruit	O	F	18.5	18.5	18.5	Passarella,I.; Elia I.; Guarino B.; Bourlot G.; Nègre M. Evaluation of the field dissipation of fungicides and insecticides used on fruit bearing trees in northern Italy. Journal of Environmental Science and Health, 2009, 44(2), 137-143.
258	Dithianon	5,10-dihydro-5,10-dioxonaphtho(2,3-b)-1,4-dithiin-2,3-dicarbonitrile	3347-22-6	Pear	Pyrus communis L. cv. Conference	Italy	Fruit	O	F	8.3	21.4	14.9	Passarella I.; Elia I.; Guarino B.; Bourlot G.; Nègre M. Evaluation of the field dissipation of fungicides and insecticides used on fruit bearing trees in northern Italy. Journal of Environmental Science and Health, 2009, 44(2), 137-143.
259	Dithiopyr	S,S'-dimethyl 2-(difluoromethyl)-4-(2-methylpropyl)-6-(trifluoromethyl)-3,5-pyridinedicarbothioate	97886-45-8	Perennial ryegrass	Lolium perenne L.	NE, USA	Blades	I	F	0.3	7.4	3.85	Schleicher L.C.; Shea P.J.; Stougaard R.N.; Tupy D.R. Efficacy and dissipation of dithiopyr and pendimethalin in perennial ryegrass (Lolium perenne) turf. Weed Science, 1995, 140-148.
259	Dithiopyr	S,S'-dimethyl 2-(difluoromethyl)-4-(2-methylpropyl)-6-(trifluoromethyl)-3,5-pyridinedicarbothioate	97886-45-8	Turfgrass	*	USA	Blades	O	F	0.9	6.3	3.6	Cowell J.E.; Adams S.A.; Kunstman J.L.; Mueth M.G. Comparison of foliar dissipation and turf dislodgeable residue sampling techniques. In ACS Symposium series-American Chemical Society (USA), 1993, Chapter 10, pp 100–112
263	Dodine	dodecylguanidine monoacetate	2439-10-3	Apple	Malus pumila Mill.	China	Fruit	I	F	2.6	4.6	3.6	Sharma I.D.; Nath A.; Patyal S.K. Estimation of N-Dodecylaguanidine acetate (Dodine) Residues in Apple (Malus domestica). Pesticide Research Journal, 1996, 8(2), 191-194.
263	Dodine	dodecylguanidine monoacetate	2439-10-3	Apple	Malus pumila Mill.	China	Leaves	I	F	4	4.9	4.45	Sharma I.D.; Nath A.; Patyal S.K. Estimation of N-Dodecylaguanidine acetate (Dodine) Residues in Apple (Mains domestica). Pesticide Research Journal, 1996, 8(2), 191-194.
1205	Edifenphos	O-ethyl S,S-diphenyl phosphorodithioate	17109-49-8	Rice	Oryza sativa L. var. Hatsuhinode & Jukkoku	Japan	Leaves	I	U	5	5	5	Ishizuka K.; Takase I.; Ei-Tan K.; Mitsui S. Absorption and translocation of Oethyl S,S-diphenyl phosphorodithioate (Hinosan) in rice plants. Agricultural and Biological Chemistry, 1973, 37, 1307–1316.
1326	Emamectin benzoate	(4R)-5-O-demethyl-4-deoxy-4-(methylamino)avermectin A1a + (4R)-5-Odemethyl-25-de(1-methylpropyl)-4-deoxy-4-(methylamino)-25-(1-methylethyl)avermectin A1a (9:1)	155569-91-8	Alfalfa	Medicago sativa	CA, USA	Leaves	O	F	0.42	0.42	0.42	Chukwudebe A.C.; Cox D.L.; Palmer S.J.; Morneweck L.A.; Payne L.D.; Dunbar D.M.; Wislocki P.G. Toxicity of emamectin benzoate foliar dislodgeable residues to two beneficial insects. Journal of Agricultural and Food Chemistry, 1997, 45(9), 3689-3693.
1326	Emamectin benzoate	(4R)-5-O-demethyl-4-deoxy-4-(methylamino)avermectin A1a + (4R)-5-Odemethyl-25-de(1-methylpropyl)-4-deoxy-4-(methylamino)-25-(1-methylethyl)avermectin A1a (9:1)	155569-91-8	Celery	Apium graveolens	CA, USA	Leaves	O	F	0.63	0.63	0.63	Chukwudebe A.C.; Cox D.L.; Palmer S.J.; Morneweck L.A.; Payne L.D.; Dunbar D.M.; Wislocki P.G. Toxicity of emamectin benzoate foliar dislodgeable residues to two beneficial insects. Journal of Agricultural and Food Chemistry, 1997, 45(9), 3689-3693.
[truncated: 1,616 more rows]
